# Supplementary material for: Enhanced crystallinity of tetrahalopyridyl (THP) derivatized compounds
Source: Royal Society of Chemistry journal article supplement (doi:10.1039/d6sc01377e), 2026-04-20
Supplement: d6sc01377e1.pdf [file d6sc01377e1.pdf]

## Supporting Information

### Enhanced Crystallinity of Tetrahalopyridyl (THP) Derivatized Compounds

Callum S. Begg,<sup>a</sup> Viktoriya G. Dragomanova,<sup>a</sup> Dmitry S. Yufit,<sup>a</sup> Toby J. Blundell,<sup>a</sup> Steven L. Cobb,<sup>a</sup> Mark A. Fox,<sup>\*a</sup> Matthew O. Kitching,<sup>\*a</sup> and William D. G. Brittain<sup>\*a</sup>

<sup>a</sup>Department of Chemistry, Durham University, South Road, Durham, DH1 3LE, United Kingdom

\*Corresponding Author emails: [m.a.fox@durham.ac.uk](mailto:m.a.fox@durham.ac.uk), [matthew.o.kitching@durham.ac.uk](mailto:matthew.o.kitching@durham.ac.uk),  
[william.d.brittain@durham.ac.uk](mailto:william.d.brittain@durham.ac.uk)

#### Contents

|                                         |       |
|-----------------------------------------|-------|
| General Experimental.....               | S-2   |
| General Procedures.....                 | S-3   |
| Characterization Data.....              | S-4   |
| NMR Data for Synthesized Compounds..... | S-29  |
| CSD Search Parameters.....              | S-145 |
| Crystallographic Information.....       | S-151 |
| Computational Data.....                 | S-194 |
| References.....                         | S-256 |

## General Experimental

All starting materials and reagents were purchased from commercial sources and used as received. All reactions were conducted under an atmosphere of air.  $^1\text{H}$  NMR spectra were recorded at 400 or 600 MHz using Bruker Avance III or Varian VNMRS-600 spectrometers respectively.  $^{13}\text{C}\{^1\text{H}\}$  NMR spectra were recorded at 100 or 151 MHz using a Bruker Avance III or Varian VNMRS-600 respectively.  $^{19}\text{F}\{^1\text{H}\}$  NMR spectra were recorded at 376 MHz using a Bruker Avance III spectrometer. All coupling constants are reported in Hertz (Hz). In cases where it was required, 2D NMR techniques were used to confirm compound identity. Chemical shifts are reported in ppm and are referenced to residual solvent peaks;  $\text{CHCl}_3$  ( $^1\text{H}$  7.26 ppm,  $^{13}\text{C}$  77.0 ppm),  $\text{CH}_3\text{CN}$  ( $^1\text{H}$  1.94 ppm,  $^{13}\text{C}$  1.89 ppm) or DMSO ( $^1\text{H}$  2.50 ppm,  $^{13}\text{C}$  39.5 ppm). Mass spectra were collected either using ESI-LC or GCMS. ESI-LC in MeCN were collected using a Waters TQD mass spectrometer with a Acquity UPLC BEH C18 1.7  $\mu\text{m}$  (2.1 mm x 50 mm). ESI-LC was collected using water containing formic acid (0.1% v/v) and MeCN mixture in a 95:5 to 5:95 gradient over 5 min. GCMS experiments were carried out on a Shimadzu QP2010-Ultra with a Rxi-5Sil MS (0.15 $\mu\text{m}$  x 10m x 0.15 mm). Helium was employed as the carrier gas (0.41 mL/min). EI is carried at 70 eV and the working mass range is 35 – 650 au for all GCMS experiments. ASAP samples were run isothermally at 350 °C vaporizing the sample to enable atmospheric pressure chemical ionization. Melting points are uncorrected and were carried out in triplicate, and an average of the values taken and reported as a range using a Stuart SMP10 or Gallenkamp MDP 350 melting point apparatus. Compounds **6**, **27**, **29** and **34** have been previously reported with their corresponding crystal structures.<sup>[1][2]</sup> For the sake of completeness, the characterization data for all compounds are given in full here.

### General Procedure for the Synthesis of Tetrafluoropyridyl Ethers

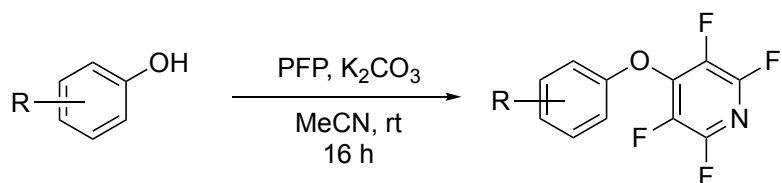

To a stirred solution of phenol (1.00 equiv.) in acetonitrile (10 mL) was added pentafluoropyridine (1.05 equiv.) and potassium carbonate (1.05 equiv.). The reaction mixture was stirred at room temperature for 16 h. After this time the reaction mixture was filtered and concentrated under reduced pressure. The resulting residue was passed through a short silica plug (100% EtOAc), concentrated and then purified directly by flash column chromatography if required.

### General Procedure for the Synthesis of Tetrafluoropyridyl Thioethers

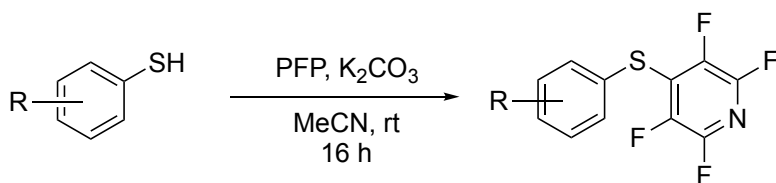

To a stirred solution of thiophenol (1.00 equiv.) in acetonitrile (10 mL) was added pentafluoropyridine (1.05 equiv.) and potassium carbonate (1.05 equiv.). The reaction mixture was stirred at room temperature for 4 h. After this time the resulting solution was filtered and concentrated under reduced pressure. The resulting residue was passed through a short silica plug (100% EtOAc), concentrated, and then purified directly by flash column chromatography if required.

### General Procedure for the Synthesis of Tetrachloropyridyl Ethers

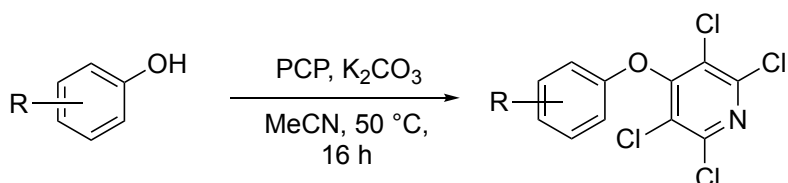

To a stirred solution of phenol (1.00 equiv.) in acetonitrile (10 mL) was added pentachloropyridine (1.00 equiv.) and potassium carbonate (1.05 equiv.). The reaction mixture was stirred at 50 °C for 16

h. After this time the resulting solution was filtered and concentrated under reduced pressure the recovered residue was then directly subjected to flash column chromatography.

### General Procedure for the Synthesis of Tetrachloropyridyl Thioethers

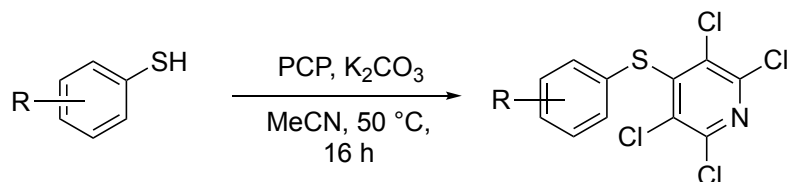

To a stirred solution of thiophenol (1.00 equiv.) in acetonitrile (10 mL) was added pentachloropyridine (1.00 equiv.) and potassium carbonate (1.05 equiv.). The reaction mixture was stirred at 50 °C for 16 h. After this time the resulting solution was filtered and concentrated under reduced pressure the recovered residue was then directly subjected to flash column chromatography.

### Synthesis of 2,3,5,6-tetrafluoro-4-(*p*-tolylthio)pyridine (1)

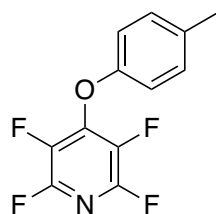

The title compound was synthesized according to the general procedure for the synthesis of tetrafluoropyridyl ethers from 4.63 mmol of the corresponding phenol as a clear crystalline solid (1.13 g) in 95% yield.

$^1\text{H}$  NMR (400 MHz,  $\text{CDCl}_3$ )  $\delta$  7.25 – 7.11 (m, 2H, ArH), 6.98 (app. d,  $J$  = 8.6, 2H, ArH), 2.38 (s, 3H,  $\text{CH}_3$ ).

$^{19}\text{F}\{^1\text{H}\}$  NMR (376 MHz,  $\text{CDCl}_3$ )  $\delta$  -88.46 – -89.71 (m), -154.17 – -155.60 (m).

$^{13}\text{C}\{^1\text{H}\}$  NMR (176 MHz,  $\text{CDCl}_3$ )  $\delta$  153.78, 145.04 – 144.57 (m), 143.86 – 143.04 (m), 137.16 – 136.45 (m), 135.55 – 135.17 (m), 134.90, 130.38, 116.56, 20.66.

HRMS  $\text{ESI}^-$  Calculated for  $[\text{M}-\text{H}]^- \text{C}_{12}\text{H}_6\text{NOF}_4^-$  = 256.0386. Found = 256.0376.

MP 52 – 53 °C.

### Synthesis of 2,3,5,6-tetrafluoro-4-(*p*-tolylthio)pyridine (2)

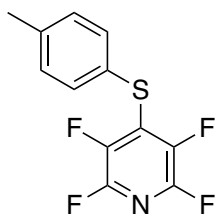

The title compound was synthesized according to the general procedure for the synthesis of tetrafluoropyridyl thioethers from 0.80 mmol of the corresponding thiophenol as a white solid (0.204 g) in 94% yield.

$^1\text{H}$  NMR (400 MHz,  $\text{CDCl}_3$ )  $\delta$  7.45 (d,  $J = 8.0$ , 2H, ArH), 7.20 (d,  $J = 8.0$ , 2H, ArH),

2.40 (s, 3H,  $\text{CH}_3$ ).

$^{19}\text{F}\{^1\text{H}\}$  NMR (376 MHz,  $\text{CDCl}_3$ )  $\delta$  -90.63 – -91.02 (m), -136.92 – -137.13 (m).

$^{13}\text{C}\{^1\text{H}\}$  NMR (101 MHz,  $\text{CDCl}_3$ )  $\delta$  144.96 – 144.41 (m), 142.53 – 141.84 (m), 140.12, 139.86 – 139.24 (m), 133.44, 131.95 – 131.29 (m), 130.41, 125.34, 21.26.

HRMS  $\text{AP}^+$  Calculated for  $[\text{M}+\text{H}]^+$   $\text{C}_{12}\text{H}_8\text{NF}_4\text{S}^+$  = 274.0314. Found= 274.0310.

MP 39 – 40 °C.

### Synthesis of 2,3,5,6-tetrachloro-4-(*p*-tolylthio)pyridine (3)

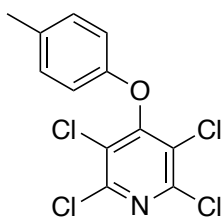

The title compound was synthesized according to the general procedure for the synthesis of tetrachloropyridyl ethers from 1.85 mmol of the corresponding phenol. Purified by flash column chromatography 100% hexanes to 90% hexanes 10% EtOAc. This gave the product as a white crystalline solid (0.424 g) in 71% yield.

$^1\text{H}$  NMR (400 MHz,  $\text{CDCl}_3$ )  $\delta$  7.18 – 7.13 (m, 2H, ArH), 6.76 (d,  $J = 8.6$ , 2H, ArH), 2.35 (s, 3H,  $\text{CH}_3$ ).

$^{13}\text{C}\{^1\text{H}\}$  NMR (101 MHz,  $\text{CDCl}_3$ )  $\delta$  157.61, 153.24, 147.18, 133.63, 130.47, 125.63, 115.24, 20.65.

HRMS  $\text{ESI}^+$  Calculated for  $[\text{M}+\text{H}]^+$   $\text{C}_{12}\text{H}_8\text{NOCl}_4^+$  = 321.9360. Found= 321.9357.

MP 106 – 107 °C.

### Synthesis of 2,3,5,6-tetrachloro-4-(*p*-tolylthio)pyridine (4)

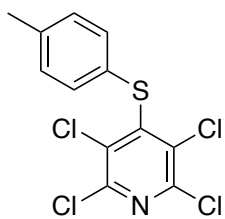

The title compound was synthesized according to the general procedure for the synthesis of tetrachloropyridyl ethers from 1.61 mmol of the corresponding thiophenol. Purified by flash column chromatography 100% hexanes to 90% hexanes 10% EtOAc. This gave the product as a white crystalline solid (0.382 g)

in 63% yield.

$^1\text{H}$  NMR (400 MHz,  $\text{CDCl}_3$ )  $\delta$  7.21 (d,  $J = 8.1$ , 2H, ArH), 7.15 (d,  $J = 8.1$ , 2H, ArH), 2.36 (s, 3H,  $\text{CH}_3$ ).

$^{13}\text{C}\{^1\text{H}\}$  NMR (101 MHz,  $\text{CDCl}_3$ )  $\delta$  148.35, 146.54, 138.76, 133.70, 131.17, 130.36, 128.32, 21.21.

HRMS ESI<sup>+</sup> Calculated for  $[\text{M}+\text{H}]^+$   $\text{C}_{12}\text{H}_8\text{NSCl}_4^+$  = 337.9132. Found = 337.9135.

MP 113 – 114 °C.

### Synthesis of 2,3,5,6-tetrafluoro-4-(4'-methoxyphenoxy)pyridine (5)

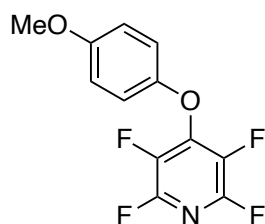

The title compound was synthesized according to the general procedure for the synthesis of tetrafluoropyridyl ethers from 1.61 mmol of the corresponding phenol as a white solid (0.394 g) in 90% yield.

$^1\text{H}$  NMR (400 MHz,  $\text{CDCl}_3$ )  $\delta$  7.05 (d,  $J = 9.2$ , 2H, ArH), 6.91 (d,  $J = 9.2$ , 2H, ArH),

3.83 (s, 3H,  $\text{CH}_3$ ).

$^{19}\text{F}\{^1\text{H}\}$  NMR (376 MHz,  $\text{CDCl}_3$ )  $\delta$  -88.94 – -89.22 (m), -154.98 – -155.18 (m).

$^{13}\text{C}\{^1\text{H}\}$  NMR (101 MHz,  $\text{CDCl}_3$ )  $\delta$  156.97, 149.70, 145.72 – 144.91 (m), 143.27 – 142.63 (m), 137.59 – 136.86 (m), 135.04 – 134.27 (m), 118.23, 114.89, 55.69.

HRMS ESI<sup>-</sup> Calculated for  $[\text{M}-\text{H}]^-$   $\text{C}_{12}\text{H}_6\text{NO}_2\text{F}_4^-$  = 272.0327. Found = 272.0335.

MP 76 – 78 °C.

### Synthesis of 2,3,5,6-tetrafluoro-4-phenoxy pyridine (6)

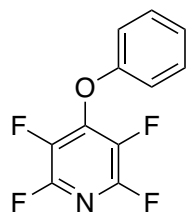

The title compound was synthesized according to the general procedure for the synthesis of tetrafluoropyridyl ethers from 1.06 mmol of the corresponding phenol as a white solid (0.257 g) in 99% yield.

$^1\text{H}$  NMR (400 MHz,  $\text{CDCl}_3$ )  $\delta$  7.47 – 7.37 (m, 2H, ArH), 7.31 – 7.21 (m, 1H, ArH), 7.09 (d,  $J$  = 8.1 Hz, 2H, ArH).

$^{19}\text{F}\{^1\text{H}\}$  NMR (376 MHz,  $\text{CDCl}_3$ )  $\delta$  -88.58 – -88.84 (m), -154.23 – -154.44 (m).

$^{13}\text{C}\{^1\text{H}\}$  NMR (101 MHz,  $\text{CDCl}_3$ )  $\delta$  155.82, 145.61 – 145.20 (m), 144.60 – 144.26 (m), 143.18 – 142.78 (m), 137.76 – 137.25 (m), 135.13 – 134.63 (m), 130.05, 125.17, 116.68.

HRMS  $\text{AP}^+$  Calculated for  $[\text{M}+\text{H}]^+$   $\text{C}_{11}\text{H}_6\text{NF}_4\text{O}^+$  = 244.0386. Found = 244.0378.

MP 32 – 33 °C.

### Synthesis of 2,3,5,6-tetrafluoro-4-(4'-bromophenoxy)pyridine (7)

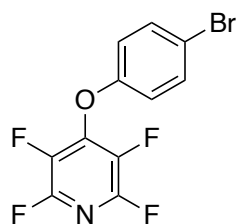

The title compound was synthesized according to the general procedure for the synthesis of tetrafluoropyridyl ethers from 4.62 mmol of 4-bromophenol, pentafluoropyridine (4.86 mmol) and  $\text{K}_2\text{CO}_3$  (4.86 mmol). The solution was passed through a short silica plug (100% EtOAc) to give the desired product as a

clear crystalline solid (1.12 g) in 76% yield.

$^1\text{H}$  NMR (400 MHz,  $\text{CDCl}_3$ )  $\delta$  7.53 (d,  $J$  = 9.0, 2H, ArH), 6.98 (d,  $J$  = 9.0, 2H, ArH).

$^{19}\text{F}\{^1\text{H}\}$  NMR (376 MHz,  $\text{CDCl}_3$ )  $\delta$  -87.90 – -88.43 (m), -153.93 – -154.20 (m).

$^{13}\text{C}\{^1\text{H}\}$  NMR (101 MHz,  $\text{CDCl}_3$ )  $\delta$  154.81, 145.68 – 145.08 (m), 144.25 – 143.67 (m), 143.20 – 142.60 (m), 137.72 – 137.04 (m), 135.05 – 134.38 (m), 133.05, 118.46, 117.98.

HRMS  $\text{ESI}^-$  Calculated for  $[\text{M}-\text{H}]^-$   $\text{C}_{11}\text{H}_3\text{NOF}_4\text{Br}^-$  = 319.9334. Found = 319.9312.

MP 61 – 62 °C.

### Synthesis of 2,3,5,6-tetrafluoro-4-(4'-chlorophenoxy)- pyridine (8)

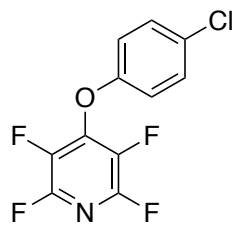

The title compound was synthesized according to the general procedure for the synthesis of tetrafluoropyridyl ethers from 3.89 mmol of 4-chlorophenol, pentafluoropyridine (4.09 mmol) and  $K_2CO_3$  (4.09 mmol). The solution was passed through a short silica plug (100% EtOAc) to give the desired product as a clear crystalline solid (0.795 g) in 74% yield.

$^1H$  NMR (400 MHz,  $CDCl_3$ )  $\delta$  7.38 (d,  $J = 9.1$ , 2H, ArH), 7.04 (d,  $J = 9.1$ , 2H, ArH).

$^{19}F\{^1H\}$  NMR (376 MHz,  $CDCl_3$ )  $\delta$  -87.99 – -88.29 (m), -154.04 – -154.24 (m).

$^{13}C\{^1H\}$  NMR (101 MHz,  $CDCl_3$ )  $\delta$  154.25, 145.65 – 145.09 (m), 144.29 – 143.84 (m), 143.19 – 142.70 (m), 137.63 – 137.09 (m), 135.05 – 134.49 (m), 130.54, 130.08, 118.09.

HRMS ESI<sup>-</sup> Calculated for  $[M-H]^-$   $C_{11}H_3NOF_4Cl^-$  = 275.9839. Found = 275.9820.

MP 31 – 32 °C.

### Synthesis of 2,3,5,6-tetrafluoro-4-(4'-nitrophenoxy)pyridine (9)

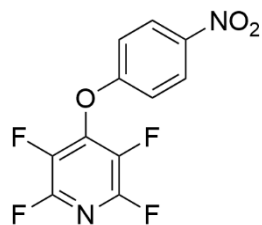

The title compound was synthesized according to the general procedure for the synthesis of tetrafluoropyridyl ethers from 3.60 mmol of the corresponding phenol as a white solid (1.01 g) in 97% yield.

$^1H$  NMR (400 MHz,  $CDCl_3$ )  $\delta$  8.33 (d,  $J = 9.2$ , 2H, ArH), 7.20 (d,  $J = 9.2$ , 2H, ArH).

$^{19}F\{^1H\}$  NMR (376 MHz,  $CDCl_3$ )  $\delta$  -85.75 – -87.34 (m), -152.80 – -154.91 (m).

$^{13}C\{^1H\}$  NMR (176 MHz,  $CDCl_3$ )  $\delta$  159.59, 145.01 – 144.75 (m), 144.66, 143.63 – 143.35 (m), 142.76 – 142.51 (m), 137.08 – 136.64 (m), 135.54 – 135.19 (m), 126.19, 116.69.

HRMS ESI<sup>-</sup> Calculated for  $[M-H]^-$   $C_{11}H_4N_2O_3F_4^-$  = 287.0080. Found = 287.0091.

MP 84 – 85 °C.

### Synthesis of 2,3,5,6-tetrafluoro-4-((4'-methoxyphenyl)thio)pyridine (10)

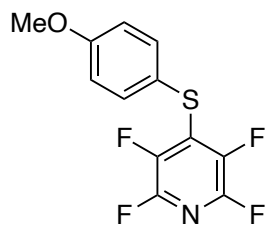

The title compound was synthesized according to the general procedure for the synthesis of tetrafluoropyridyl thioethers from 1.43 mmol of the corresponding thiophenol as a white crystalline solid (0.393 g) in 95% yield.

$^1\text{H}$  NMR (400 MHz,  $\text{CDCl}_3$ )  $\delta$  7.54 (d,  $J = 8.9$ , 2H, ArH), 6.92 (d,  $J = 8.9$ , 2H, ArH),

3.85 (s, 3H,  $\text{CH}_3$ ).

$^{19}\text{F}\{^1\text{H}\}$  (376 MHz,  $\text{CDCl}_3$ )  $\delta$  -90.94 – -91.11 (m), -137.83 – -138.01 (m).

$^{13}\text{C}\{^1\text{H}\}$  NMR (101 MHz,  $\text{CDCl}_3$ )  $\delta$  161.12, 145.01 – 144.31 (m), 142.58 – 141.61 (m), 139.66 – 139.05 (m), 136.01, 132.84 – 131.81 (m), 118.71, 115.17, 55.45.

HRMS  $\text{AP}^+$  Calculated for  $[\text{M}+\text{H}]^+$   $\text{C}_{12}\text{H}_8\text{NOF}_4\text{S}^+$  = 290.0247. Found = 290.0263.

MP 34 – 36 °C.

### Synthesis of 2,3,5,6-tetrafluoro-4-(phenylthio)pyridine (11)

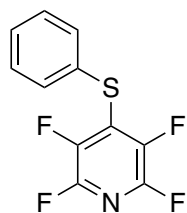

The title compound was synthesized according to the general procedure for the synthesis of tetrafluoropyridyl thioethers from 0.90 mmol of the corresponding phenol as a clear oil (0.232 g) in 99% yield. Crystals suitable for single crystal x-ray diffraction were obtained by cooling the material in a fridge.

$^1\text{H}$  NMR (400 MHz,  $\text{CDCl}_3$ )  $\delta$  7.61 – 7.48 (m, 2H, ArH), 7.46 – 7.36 (m, 3H, ArH).

$^{19}\text{F}\{^1\text{H}\}$  NMR (376 MHz,  $\text{CDCl}_3$ )  $\delta$  -90.35 – -90.63 (m), -136.35 – -136.54 (m).

$^{13}\text{C}\{^1\text{H}\}$  NMR (101 MHz,  $\text{CDCl}_3$ )  $\delta$  145.00 – 144.52 (m), 142.54 – 142.05 (m), 139.97 – 139.45 (m), 132.95, 131.20 – 130.76 (m), 129.66, 129.50, 129.18.

HRMS  $\text{AP}^+$  Calculated for  $[\text{M}+\text{H}]^+$   $\text{C}_{11}\text{H}_6\text{NF}_4\text{S}^+$  = 260.0157. Found = 260.0148.

MP 30 – 31 °C.

### Synthesis of 2,3,5,6-tetrafluoro-4-((4'-bromophenyl)thio)pyridine (12)

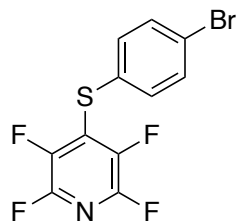

The title compound was synthesized according to the general procedure for the synthesis of tetrafluoropyridyl thioethers from 26.5 mmol of the corresponding thiophenol as pale yellow crystals (8.89 g) in 99% yield.

$^1\text{H}$  NMR (400 MHz,  $\text{CDCl}_3$ )  $\delta$  7.50 (d,  $J = 8.5$ , 2H, ArH), 7.38 (d,  $J = 8.5$ , 2H, ArH).

$^{19}\text{F}\{^1\text{H}\}$  NMR (376 MHz,  $\text{CDCl}_3$ )  $\delta$  -89.85 – -90.02 (m), -136.10 – -136.28 (m).

$^{13}\text{C}\{^1\text{H}\}$  NMR (101 MHz,  $\text{CDCl}_3$ )  $\delta$  144.98 – 144.54 (m), 142.52 – 142.01 (m), 139.93 – 139.47 (m), 134.42, 132.87, 132.23, 130.52 – 129.98 (m), 129.36, 128.22, 124.17.

ASAP MS:  $R_t = 0.65$  min;  $m/z$  ( $\text{Al}^+$ ): 339.9 ( $[\text{M}^{(81)\text{Br}}+\text{H}]^+$ , 99%), 337.9 ( $[\text{M}^{(79)\text{Br}}+\text{H}]^+$ , 100%).

HRMS  $\text{AP}^+$  Calculated for  $[\text{M}+\text{H}]^+ \text{C}_{11}\text{H}_5\text{BrF}_4\text{NS}^+ = 337.9262$ . Found = 337.9273.

$R_f = 0.48$  (0.5:9.5, EtOAc:Hexanes).

MP 55 – 56 °C.

### Synthesis of 2,3,5,6-tetrafluoro-4-(4'-chlorophenyl)thiopyridine (13)

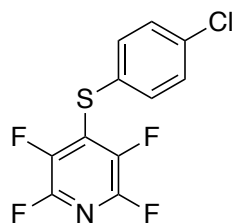

The title compound was synthesized according to the general procedure for the synthesis of tetrafluoropyridyl thioethers from 3.46 mmol of the corresponding thiophenol as pale yellow crystals (0.87 g) in 86% yield.

$^1\text{H}$  NMR (400 MHz,  $\text{CDCl}_3$ )  $\delta$  7.49 (d,  $J = 8.7$ , 2H, ArH), 7.38 (d,  $J = 8.7$ , 2H, ArH).

$^{19}\text{F}\{^1\text{H}\}$  NMR (376 MHz,  $\text{CDCl}_3$ )  $\delta$  -89.91 – -90.08 (m), -136.24 – -136.42 (m).

$^{13}\text{C}\{^1\text{H}\}$  NMR (101 MHz,  $\text{CDCl}_3$ )  $\delta$  145.03 – 144.49 (m), 142.49 – 142.02 (m), 139.94 – 139.39 (m), 136.09, 134.34, 130.69 – 130.22 (m), 129.91, 129.30 (d,  $J = 2.1$ ), 127.49 (t,  $J = 2.1$ ).

ASAP MS:  $R_t = 0.69$  min;  $m/z$  ( $\text{Al}^+$ ): 295.9 ( $[\text{M}^{(37)\text{Cl}}+\text{H}]^+$ , 45%), 293.9 ( $[\text{M}^{(35)\text{Cl}}+\text{H}]^+$ , 100%).

HRMS  $\text{AP}^+$  Calculated for  $[\text{M}+\text{H}]^+ \text{C}_{11}\text{H}_5\text{ClF}_4\text{NS}^+ = 293.9767$ . Found = 293.9754.

MP 52 – 53 °C.

### Synthesis of 2,3,5,6-tetrafluoro-4-(4'-nitrophenyl)thiopyridine (14)

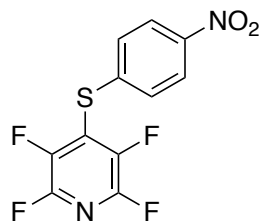

The title compound was synthesized according to the general procedure for the synthesis of tetrafluoropyridyl thioethers from 3.23 mmol of the corresponding thiophenol as bright yellow crystals (0.91 g) in 92% yield.

$^1\text{H}$  NMR (400 MHz,  $\text{CDCl}_3$ )  $\delta$  8.22 (d,  $J = 9.0$ , 2H, ArH), 7.54 (d,  $J = 9.0$ , 2H, ArH).

$^{19}\text{F}\{^1\text{H}\}$  NMR (376 MHz,  $\text{CDCl}_3$ )  $\delta$  -88.30 – -88.52 (m), -134.07 – -134.26 (m).

$^{13}\text{C}\{^1\text{H}\}$  NMR (101 MHz,  $\text{CDCl}_3$ )  $\delta$  147.65, 145.16 – 144.75 (m), 143.00 – 142.26 (m), 140.46 – 139.93 (m), 138.65, 130.93, 127.78 – 127.26 (m), 126.37, 124.64.

ASAP MS:  $R_t = 0.60$  min;  $m/z$  ( $\text{Al}^+$ ): 305.0 ( $[\text{M}+\text{H}]^+$ , 100%).

HRMS  $\text{AP}^+$  Calculated for  $[\text{M}+\text{H}]^+ \text{C}_{11}\text{H}_5\text{F}_4\text{N}_2\text{O}_2\text{S}^+$  = 305.0008. Found = 304.9999.

MP 96 – 97 °C.

### Synthesis of 2,3,5,6-tetrafluoro-4-(4'-iodophenoxy)pyridine (15)

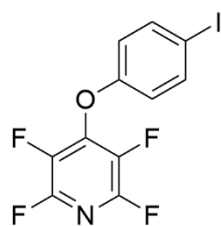

The title compound was synthesized according to the general procedure for the synthesis of tetrafluoropyridyl ethers from 2.27 mmol of the corresponding phenol as a white solid (0.835 g) in 99% yield.

$^1\text{H}$  NMR (400 MHz,  $\text{CDCl}_3$ )  $\delta$  7.71 (d,  $J = 9.0$ , 2H, ArH), 6.86 (d,  $J = 9.0$ , 2H, ArH).

$^{19}\text{F}\{^1\text{H}\}$  NMR (376 MHz,  $\text{CDCl}_3$ )  $\delta$  -87.54 – -88.84 (m), -153.20 – -154.50 (m).

$^{13}\text{C}\{^1\text{H}\}$  NMR (176 MHz,  $\text{CDCl}_3$ )  $\delta$  155.62, 144.98 – 144.70 (m), 143.95 – 143.66 (m), 143.57 – 143.31 (m), 138.99, 136.99 – 136.64 (m), 135.46 – 135.15 (m), 118.74, 88.39.

HRMS  $\text{ESI}^-$  Calculated for  $[\text{M}-\text{H}]^- \text{C}_{11}\text{H}_3\text{NOF}_4\text{I}^-$  = 367.9196. Found = 367.9203.

MP 86 – 87 °C.

### Synthesis of 2,3,5,6-tetrachloro-4-(4'-chlorophenoxy)pyridine (16)

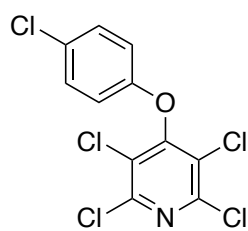

The title compound was synthesized according to the general procedure for the synthesis of tetrachloropyridyl ethers from 1.56 mmol of the corresponding phenol. Purified by flash column chromatography 100% hexanes to 90% hexanes 10% EtOAc. This gave the product as a white crystalline solid (0.426 g)

in 80% yield.

$^1\text{H NMR}$  (400 MHz,  $\text{CDCl}_3$ )  $\delta$  7.33 (d,  $J = 9.1$ , 2H, *ArH*), 6.82 (d,  $J = 9.1$ , 2H, *ArH*).

$^{13}\text{C}\{^1\text{H}\}$  NMR (101 MHz,  $\text{CDCl}_3$ )  $\delta$  156.99, 153.70, 147.36, 130.07, 129.33, 125.48, 116.80.

HRMS  $\text{ESI}^-$  Calculated for  $[\text{M}-\text{H}]^- \text{C}_{11}\text{H}_3\text{NOCl}_5^- = 339.8657$ . Found = 339.8656.

MP 125 – 126 °C.

### Synthesis of 2,3,5,6-tetrachloro-4-(4'-bromophenoxy)pyridine (17)

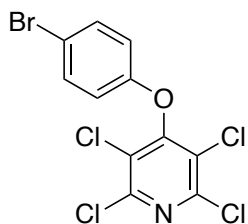

The title compound was synthesized according to the general procedure for the synthesis of tetrachloropyridyl ethers from 1.16 mmol of the corresponding phenol. Purified by flash column chromatography 100% hexanes to 90% hexanes 10% EtOAc. This gave the product as a white crystalline solid (0.391 g)

in 88% yield.

$^1\text{H NMR}$  (400 MHz,  $\text{CDCl}_3$ )  $\delta$  7.48 (d,  $J = 9.1$ , 2H, *ArH*), 6.76 (d,  $J = 9.1$ , 2H, *ArH*).

$^{13}\text{C}\{^1\text{H}\}$  NMR (101 MHz,  $\text{CDCl}_3$ )  $\delta$  156.90, 154.24, 147.36, 133.03, 125.47, 117.22, 116.71.

HRMS  $\text{AP}^+$  Calculated for  $[\text{M}+\text{H}]^+ \text{C}_{11}\text{H}_5\text{NOCl}_4\text{Br}^+ = 385.8309$ . Found = 385.8300.

MP 137 °C.

### Synthesis of 2,3,5,6-tetrachloro-4-(4'-nitrophenoxy)pyridine (18)

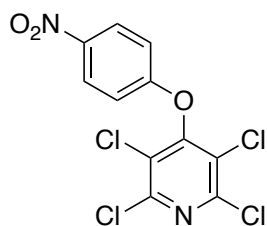

The title compound was synthesized according to the general procedure for the synthesis of tetrachloropyridyl ethers from 1.44 mmol of the corresponding phenol. Purified by flash column chromatography 100% hexanes to 90% hexanes 10% EtOAc. This gave the product as a white crystalline solid (0.426 g) in 46% yield.

$^1\text{H}$  NMR (400 MHz,  $\text{CDCl}_3$ )  $\delta$  8.29 (d,  $J = 9.3$ , 2H, ArH), 7.00 (d,  $J = 9.3$ , 2H, ArH). \*Note a small amount of an unknown impurity was observed in the spectra\*

$^{13}\text{C}\{^1\text{H}\}$  NMR (101 MHz,  $\text{CDCl}_3$ )  $\delta$  159.19, 155.96, 147.60, 144.07, 126.34, 125.28, 115.78.

HRMS ESI $^-$  Calculated for  $[\text{M}-\text{H}]^- \text{C}_{11}\text{H}_3\text{N}_2\text{O}_3\text{Cl}_4^- = 350.8898$ . Found = 350.8902.

MP 163 – 164  $^\circ\text{C}$ .

### Synthesis of 2,3,5,6-tetrachloro-4-(4'-methoxyphenoxy)pyridine (19)

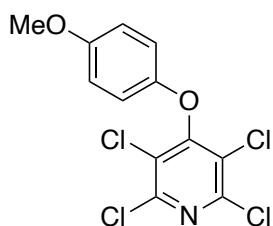

The title compound was synthesized according to the general procedure for the synthesis of tetrachloropyridyl ethers from 1.61 mmol of the corresponding phenol. Purified by flash column chromatography 100% hexanes to 90% hexanes 10% EtOAc. This gave the product as a white crystalline solid (0.431 g) in 79% yield.

$^1\text{H}$  NMR (400 MHz,  $\text{CDCl}_3$ )  $\delta$  6.88 (d,  $J = 9.3$ , 2H, ArH), 6.81 (d,  $J = 9.3$ , 2H, ArH), 3.81 (s, 3H,  $\text{CH}_3$ ).

$^{13}\text{C}\{^1\text{H}\}$  NMR (101 MHz,  $\text{CDCl}_3$ )  $\delta$  157.88, 156.03, 149.29, 147.21, 125.52, 116.59, 114.95, 55.70.

HRMS ESI $^+$  Calculated for  $[\text{M}+\text{H}]^+ \text{C}_{12}\text{H}_8\text{NO}_2\text{Cl}_4^+ = 337.9309$ . Found = 337.9317.

MP 138 – 139  $^\circ\text{C}$ .

### Synthesis of 2,3,5,6-tetrachloro-4-((4'-chlorophenyl)thio)pyridine (20)

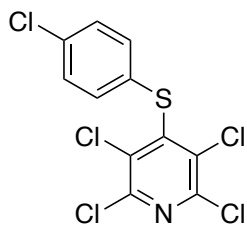

The title compound was synthesized according to the general procedure for the synthesis of tetrachloropyridyl ethers from 1.38 mmol of the corresponding thiophenol. Purified by flash column chromatography 100% hexanes to 90% hexanes 10% EtOAc. This gave the product as a white crystalline solid (0.080 g)

in 16% yield.

$^1\text{H}$  NMR (400 MHz,  $\text{CDCl}_3$ )  $\delta$  7.33 (d,  $J = 8.7$ , 2H, ArH), 7.23 (d,  $J = 8.7$ , 2H, ArH).

$^{13}\text{C}\{^1\text{H}\}$  NMR (101 MHz,  $\text{CDCl}_3$ )  $\delta$  147.25, 146.76, 134.62, 133.85, 131.95, 130.40, 129.84.

HRMS AP<sup>+</sup> Calculated for  $[\text{M}+\text{H}]^+$   $\text{C}_{11}\text{H}_5\text{NSCl}_5^+$  = 357.8585. Found = 357.8588.

MP 131 – 132 °C.

### Synthesis of 2,3,5,6-tetrachloro-4-((4'-bromophenyl)thio)pyridine (21)

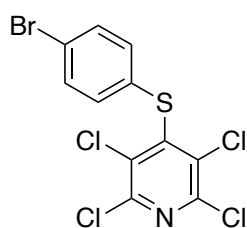

The title compound was synthesized according to the general procedure for the synthesis of tetrachloropyridyl ethers from 1.06 mmol of the corresponding thiophenol. Purified by flash column chromatography 100% hexanes to 90% hexanes 10% EtOAc. This gave the product as a white crystalline solid (0.092 g)

in 22% yield.

$^1\text{H}$  NMR (400 MHz,  $\text{CDCl}_3$ )  $\delta$  7.48 (d,  $J = 8.6$ , 2H, ArH), 7.16 (d,  $J = 8.6$ , 2H, ArH).

$^{13}\text{C}\{^1\text{H}\}$  NMR (101 MHz,  $\text{CDCl}_3$ )  $\delta$  147.09, 146.77, 133.89, 132.78, 132.04, 131.11, 122.58.

HRMS AP<sup>+</sup> Calculated for  $[\text{M}+\text{H}]^+$   $\text{C}_{11}\text{H}_5\text{NSCl}_4\text{Br}^+$  = 401.8080. Found = 401.8090.

MP 147 – 148 °C.

### Synthesis of 2,3,5,6-tetrachloro-4-((4'-methoxyphenyl)thio)pyridine (22)

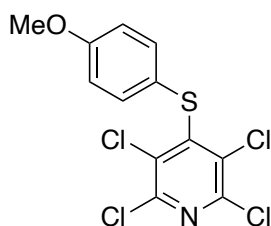

The title compound was synthesized according to the general procedure for the synthesis of tetrachloropyridyl ethers from 1.43 mmol of the corresponding thiophenol. Purified by flash column chromatography 100%

hexanes to 90% hexanes 10% EtOAc. This gave the product as a white crystalline solid (0.416 g) in 82% yield.

$^1\text{H}$  NMR (400 MHz,  $\text{CDCl}_3$ )  $\delta$  7.33 (d,  $J = 8.9$ , 2H, ArH), 6.87 (d,  $J = 8.9$ , 2H, ArH), 3.82 (s, 3H,  $\text{CH}_3$ ).

$^{13}\text{C}\{^1\text{H}\}$  NMR (101 MHz,  $\text{CDCl}_3$ )  $\delta$  160.28, 148.94, 146.51, 134.05, 133.28, 121.95, 115.15, 55.43.

HRMS ESI<sup>+</sup> Calculated for  $[\text{M}+\text{H}]^+$   $\text{C}_{12}\text{H}_8\text{NOSCl}_4^+$  = 353.9081. Found = 353.9089.

MP 128 – 129 °C.

### Synthesis of 2,3,5,6-tetrafluoro-*N*-(*p*-tolyl)pyridin-4-amine (23)

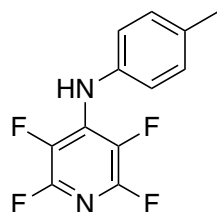

To a solution of 4-methylaniline (0.243 g, 2.27 mmol) in MeCN (3 mL) was added pentafluoropyridine (0.320 g, 1.89 mmol) and  $\text{K}_2\text{CO}_3$  (0.506 g, 4.54 mmol). The resulting solution was heated to reflux overnight. The solution was then filtered and concentrated under reduced pressure. The recovered material was purified

by flash column chromatography (100% hexanes to 90% hexanes 10% EtOAc. This gave the desired product as a brown crystalline solid (0.038 g) in 8% yield.

$^1\text{H}$  NMR (400 MHz,  $\text{CDCl}_3$ )  $\delta$  7.19 (d,  $J = 8.0$ , 2H, ArH), 7.05 (d,  $J = 8.0$ , 2H, ArH), 6.30 (brs, 1H, NH), 2.39 (s, 3H,  $\text{CH}_3$ ).

$^{19}\text{F}\{^1\text{H}\}$  NMR (376 MHz,  $\text{CDCl}_3$ )  $\delta$  -92.68 – -92.91 (m), -156.49 – -156.70 (m).

$^{13}\text{C}\{^1\text{H}\}$  NMR (101 MHz,  $\text{CDCl}_3$ )  $\delta$  145.73 – 145.12 (m), 143.45 – 142.67 (m), 135.71, 135.51, 134.98 – 134.38 (m), 133.91 – 133.13 (m), 131.45 – 130.69 (m), 129.67, 122.46 (t,  $J = 1.8$ ), 20.95.

HRMS ESI<sup>-</sup> Calculated for  $[\text{M}-\text{H}]^-$   $\text{C}_{12}\text{H}_7\text{N}_2\text{F}_4^-$  = 255.0545. Found = 255.0547.

MP 98 – 99 °C.

### Synthesis of 2,3,5,6-tetrachloro-*N*-(*p*-tolyl)pyridine-4-amine (24)

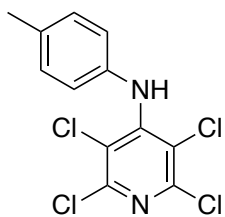

To a solution of 4-methylaniline (0.200 g, 1.87 mmol) and pentachloropyridine (0.373 g, 1.48 mmol) in MeCN (3 mL) in a sealed tube was added  $\text{Cs}_2\text{CO}_3$  (0.609 g, 1.87 mmol) and the tube heated to 100 °C for 16h. After this time the reaction mixture was filtered and concentrated under reduced pressure. The residue was then purified by flash column chromatography 100% hexanes to 100% EtOAc. This gave the product as a white crystalline solid (0.052 g) in 9% yield.

$^1\text{H}$  NMR (400 MHz,  $\text{CDCl}_3$ )  $\delta$  7.16 (d,  $J = 8.1$ , 2H, ArH), 6.90 (d,  $J = 8.1$ , 2H, ArH), 6.69 (brs, 1H, NH), 2.38 (s, 3H,  $\text{CH}_3$ ).

$^{13}\text{C}\{^1\text{H}\}$  NMR (101 MHz,  $\text{CDCl}_3$ )  $\delta$  147.62, 146.66, 136.45, 135.32, 129.58, 122.64, 118.17, 20.96.

HRMS ESI<sup>+</sup> Calculated for  $[\text{M}+\text{H}]^+$   $\text{C}_{12}\text{H}_9\text{N}_2\text{Cl}_4^+$  = 320.9520. Found = 320.9521.

MP 129 – 130 °C.

### Synthesis of 2,3,5,6-tetrafluoro-*N*-methyl-*N*-(*p*-tolyl)pyridine-4-amine (25)

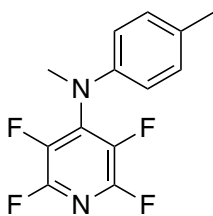

To a pressure tube was added *N*-methyl-*p*-toluidine (0.30 g, 2.48 mmol), pentafluoropyridine (0.440 g, 2.60 mmol) and  $\text{Cs}_2\text{CO}_3$  (0.889 g, 2.73 mmol) and MeCN (2 mL). The reaction mixture was heated at 120 °C for 16 h. After this time the reaction mixture was filtered, and the filtrate washed with MeCN (20 mL).

The solution was then concentrated to give the product as a yellow crystalline solid (0.421 g) in 63% yield.

$^1\text{H}$  NMR (400 MHz,  $\text{CDCl}_3$ )  $\delta$  7.16 (d,  $J = 8.2$ , 2H, ArH), 6.95 (d,  $J = 8.2$ , 2H, ArH), 3.51 (t,  $J = 2.0$ , 3H,  $\text{NCH}_3$ ), 2.36 (s, 3H,  $\text{ArCH}_3$ ).

$^{19}\text{F}\{^1\text{H}\}$  NMR (376 MHz,  $\text{CDCl}_3$ )  $\delta$  -92.02 – -92.26 (m), -148.52 – -148.73 (m).

$^{13}\text{C}\{^1\text{H}\}$  NMR (101 MHz,  $\text{CDCl}_3$ )  $\delta$  146.17 – 145.68 (m), 143.68, 143.60 – 143.33 (m), 138.31 – 137.81 (m), 135.77 – 135.22 (m), 133.43, 129.93, 119.21, 40.76 (t,  $J = 4.4$ ), 20.71.

HRMS ESI<sup>-</sup> Calculated for  $[\text{M}+\text{H}]^+$   $\text{C}_{13}\text{H}_{11}\text{N}_2\text{F}_4^+$  = 271.0858. Found = 271.0829.

### Synthesis of 2,3,5,6-tetrafluoro-4-(naphthalen-2'-yloxy)pyridine (26)

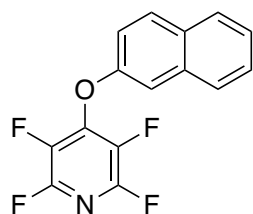

The title compound was synthesized according to the general procedure for the synthesis of tetrafluoropyridyl ethers from 3.47 mmol of the corresponding naphthol as a white crystalline solid (0.987 g) in 97% yield.

$^1\text{H}$  NMR (400 MHz,  $\text{CDCl}_3$ )  $\delta$  7.94 – 7.87 (m, 2H, ArH), 7.78 (App d,  $J = 8.1$ , 1H, ArH), 7.59 – 7.48 (m, 2H, ArH), 7.39 – 7.32 (m, 2H, ArH).

$^{19}\text{F}\{^1\text{H}\}$  NMR (376 MHz,  $\text{CDCl}_3$ )  $\delta$  -88.30 – -88.51 (m), -153.96 – -154.17 (m).

$^{13}\text{C}\{^1\text{H}\}$  NMR (176 MHz,  $\text{CDCl}_3$ )  $\delta$  153.53, 145.03 – 144.78 (m), 144.41 (dt,  $J = 10.7, 5.5$  Hz), 143.66 – 143.39 (m), 137.18 – 136.88 (m), 135.68 – 135.41 (m), 133.68, 130.86, 130.46, 127.87, 127.30, 127.24, 125.72, 117.20, 112.21.

IR  $\nu_{\text{max}}$  (ATR)/ $\text{cm}^{-1}$  1647, 1628, 1480, 1208, 1153, 1124, 1061, 976, 817, 747, 472.

HRMS  $\text{ESI}^-$  Calculated for  $[\text{M}-\text{H}]^- \text{C}_{15}\text{H}_6\text{NOF}_4^- = 292.0386$ . Found = 292.0376.

MP 94 – 95 °C.

### Synthesis of 2,3,5,6-tetrafluoro-4-[(1'-iodonaphthalen-2'-yl)oxy]pyridine (27)

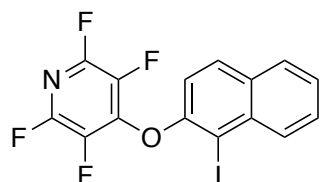

To a stirred solution of TFP ether (1.00 equiv.) in TFA (2 mL) was added NIS (1.10 equiv.) and the resulting solution stirred for 1 h at rt. After this time the reaction mixture was concentrated under reduced pressure.

The resulting residue was taken up in EtOAc (30 mL) and washed with 1 M sodium thiosulfate solution.

The organic fraction was then dried over  $\text{MgSO}_4$  and concentrated under reduced pressure. The residue was purified by flash column chromatography.

Iodination was carried out as detailed in the general procedure for iodination. Following flash column chromatography, the recovered solid was recrystallized from hexanes. The reaction was carried out on 0.68 mmol of the corresponding tetrafluoropyridyl phenol this gave the product as a white crystalline solid in a 62% (0.174 g) yield.

$^1\text{H}$  NMR (400 MHz,  $\text{CDCl}_3$ )  $\delta$  8.27 – 8.21 (m, 1H, ArH), 7.90 – 7.83 (m, 2H, ArH), 7.71 – 7.65 (m, 1H, ArH), 7.61 – 7.54 (m, 1H, ArH), 7.18 (d,  $J$  = 8.9, 1H, ArH).

$^{19}\text{F}\{^1\text{H}\}$  NMR (376 MHz,  $\text{CDCl}_3$ )  $\delta$  -88.40 – -88.61 (m), -155.17 – -155.37 (m).

$^{13}\text{C}\{^1\text{H}\}$  NMR (101 MHz,  $\text{CDCl}_3$ )  $\delta$  152.64, 145.69 – 145.17 (m), 144.50 – 144.01 (m), 143.28 – 142.77 (m), 137.72 – 137.25 (m), 136.09, 135.34, 135.10 – 134.64 (m), 132.45, 129.12, 127.69, 125.68, 121.75, 111.14, 94.38.

IR  $\nu_{\text{max}}$  (ATR)/ $\text{cm}^{-1}$  1642, 1473, 1203, 984, 961, 815, 762, 521.

HRMS  $\text{ESI}^-$  Calculated for  $[\text{M}-\text{H}]^- \text{C}_{15}\text{H}_5\text{NOF}_4^{127}\text{I}^-$  = 417.9352. Found = 417.9363.

MP 121 – 123  $^\circ\text{C}$ .

### Synthesis of 2'-((2,3,5,6-tetrafluoropyridin-4''-yl)oxy)-[1,1'-binaphthalen]-2-ol (28)

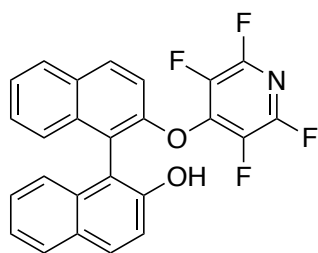

The title compound was synthesized according to the general procedure for the synthesis of tetrafluoropyridyl ethers from 1.75 mmol of *rac*-BINOL, pentafluoropyridine (1.57 mmol) and  $\text{K}_2\text{CO}_3$  (1.75 mmol). The recovered material was purified using flash column chromatography

(100% hexanes to 50% hexanes 50% toluene) as a clear crystalline solid (0.479 g) in 70% yield.

$^1\text{H}$  NMR (400 MHz,  $\text{CDCl}_3$ )  $\delta$  8.14 (d,  $J$  = 9.0, 1H, ArH), 8.04 (d,  $J$  = 8.3, 1H, ArH), 7.86 (d,  $J$  = 8.9, 1H, ArH), 7.81 (d,  $J$  = 7.9, 1H, ArH), 7.65 – 7.53 (m, 2H, ArH), 7.46 – 7.41 (m, 1H, ArH), 7.40 – 7.32 (m, 2H, ArH), 7.30 – 7.27 (m, 1H, ArH), 7.25 (d,  $J$  = 8.9, 1H, ArH), 7.03 (d,  $J$  = 8.3 Hz, 1H, ArH), 4.90 (brs, 1H, OH).

$^{19}\text{F}\{^1\text{H}\}$  NMR (376 MHz,  $\text{CDCl}_3$ )  $\delta$  -90.13 – -90.34 (m), -154.35 – -154.55 (m).

$^{13}\text{C}\{^1\text{H}\}$  NMR (101 MHz,  $\text{CDCl}_3$ )  $\delta$  152.84, 151.81, 144.90 – 144.28 (m), 142.42 – 141.88 (m), 136.54 – 135.98 (m), 133.94 – 133.40 (m), 132.94, 131.79, 131.64, 131.01, 128.62, 128.50, 128.15, 127.06, 126.52, 125.64, 123.95, 123.89, 119.10, 118.94, 117.36, 112.14.

HRMS  $\text{ESI}^-$  Calculated for  $[\text{M}-\text{H}]^- \text{C}_{25}\text{H}_{12}\text{NO}_2\text{F}_4^-$  = 434.0804. Found = 434.0783.

MP 154 – 155  $^\circ\text{C}$ .

### Synthesis of (S)-2,2'-bis((2',3',5',6'-tetrafluoropyridin-4''-yl)oxy)-1,1'-binaphthalene (29)

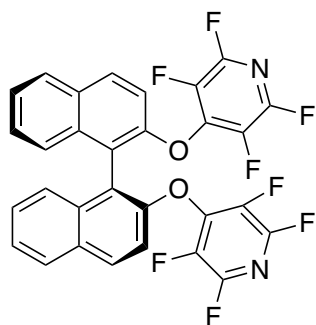

The title compound was synthesized according to the general procedure for the synthesis of tetrafluoropyridyl ethers from 0.70 mmol of (S)-BINOL, pentafluoropyridine (1.47 mmol) and  $K_2CO_3$  (1.47 mmol). The solution was then passed through a short silica plug (100% EtOAc) to give the desired product as a clear crystalline solid (0.397 g) in 97% yield.

$^1H$  NMR (400 MHz,  $CDCl_3$ )  $\delta$  8.02 (d,  $J = 9.0$ , 2H, ArH), 7.93 (d,  $J = 8.3$ , 2H, ArH), 7.50 (m, 4H, ArH), 7.40 – 7.34 (m, 2H, ArH), 7.23 (d,  $J = 8.3$ , 2H, ArH).

$^{19}F\{^1H\}$  NMR (376 MHz,  $CDCl_3$ )  $\delta$  -89.74 – -89.96 (m), -154.03 – -154.25 (m).

$^{13}C\{^1H\}$  NMR (101 MHz,  $CDCl_3$ )  $\delta$  152.25, 144.88 – 144.19 (m), 142.58 – 141.89 (m), 136.70 – 136.02 (m), 134.13 – 133.40 (m), 132.90, 131.28, 130.86, 128.30, 127.79, 126.26, 124.99, 119.36, 117.93.

HRMS ESI<sup>-</sup> Calculated for  $[M-H]^-$   $C_{30}H_{11}N_2O_2F_8^- = 583.0692$ . Found = 583.0606.

MP 210 – 211 °C.

### Synthesis of 1,4-bis((2,3,5,6-tetrafluoropyridin-4'-yl)oxy)benzene (30)

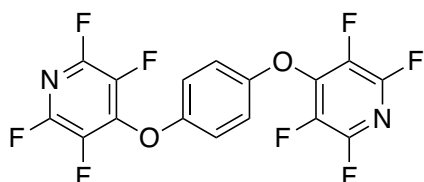

The title compound was synthesized according to the general procedure for the synthesis of tetrafluoropyridyl ethers from 2.50 mmol of hydroquinone, pentafluoropyridine (5.50 mmol)

and  $K_2CO_3$  (5.50 mmol) as a white crystalline solid (0.987 g) in 97% yield.

$^1H$  NMR (400 MHz,  $CDCl_3$ )  $\delta$  7.13 (s, 4H, ArH).

$^{19}F\{^1H\}$  NMR (376 MHz,  $CDCl_3$ )  $\delta$  -88.07 – -88.29 (m), -154.19 – -154.45 (m).

$^{13}C\{^1H\}$  NMR (101 MHz,  $CDCl_3$ )  $\delta$  152.65, 145.71 – 145.09 (m), 144.54 – 143.95 (m), 143.23 – 142.68 (m), 137.70 – 136.74 (m), 134.95 – 134.35 (m), 118.48.

HRMS ESI<sup>-</sup> Calculated for  $[M-H]^-$   $C_{16}H_3N_2O_2F_8^- = 407.0067$ . Found = 407.0075.

MP 128 – 129 °C.

### Synthesis of 2,3,5,6-tetrafluoro-4-({4''-methoxy-[1',1''-biphenyl]-3'-yl}oxy)pyridine (31)

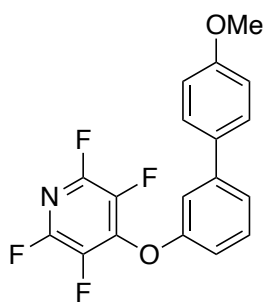

A solution of tetrafluoropyridyl-iodo-phenol (1.00 equiv.) and corresponding boronic acid were dissolved in 1,4-dioxane (10 mL) and the solution degassed by bubbling nitrogen for 1 h. At the same time a solution of  $K_2CO_3$  (3.00 equiv.) in water was also degassed by bubbling nitrogen for 1 h. After this time,  $Pd(PPh_3)_4$  (5 mol%) was added to the dioxane solution and the resulting mixture degassed for a further 10 min. The  $K_2CO_3$  water solution was then transferred *via* syringe to the dioxane solution and the resulting mixture was heated at reflux for 12 h. The reaction mixture was then cooled and concentrated under reduced pressure. The resulting residue was taken up in EtOAc (50 mL) and washed with  $H_2O$  (25 mL), the organic layer was dried over  $MgSO_4$ , filtered and concentrated. The recovered residue was then subjected to flash column chromatography (100% hexanes to 90% hexanes 20% EtOAc).

The title compound was synthesized according to the general procedure for the Suzuki-Miyaura cross-coupling from 0.27 mmol of the corresponding tetrafluoropyridyl phenol iodide as a white crystalline solid (0.085 g) in 91% yield.

$^1H$  NMR (400 MHz,  $CDCl_3$ )  $\delta$  7.52 (d,  $J = 8.9$ , 2H, ArH), 7.48 – 7.40 (m, 2H, ArH), 7.28 – 7.23 (m, 1H, ArH), 7.06 – 6.96 (m, 3H, ArH), 3.88 (s, 3H,  $CH_3$ ).

$^{19}F\{^1H\}$  NMR (376 MHz,  $CDCl_3$ )  $\delta$  -88.41 – -88.64 (m), -154.04 – -154.24 (m).

$^{13}C\{^1H\}$  NMR (176 MHz,  $CDCl_3$ )  $\delta$  159.70, 156.19, 144.99 – 144.76 (m), 144.51 – 144.31 (m), 143.60 – 143.37 (m), 143.25, 137.08 – 136.80 (m), 135.57 – 135.31 (m), 132.18, 130.20, 128.21, 123.50, 114.99, 114.53, 114.34, 55.36.

IR  $\nu_{max}$  (ATR)/ $cm^{-1}$  3034, 2844, 1603, 1581, 1462, 1282, 966, 837, 782.

HRMS ESI<sup>-</sup> Calculated for  $[M-H]^- C_{18}H_{10}NO_2F_4^- = 348.0648$ . Found = 348.0631.

MP 98 – 100 °C.

**Synthesis of 4,4'-((propane-2,2-diylbis(4,1-phenylene))bis(oxy))bis(2,3,5,6-tetrafluoropyridine) (32)**

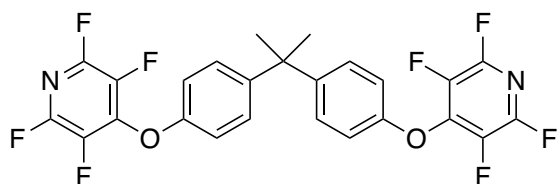

The title compound was synthesized according to the general procedure for the synthesis of tetrafluoropyridyl ethers from 13.2 mmol of bisphenol A, pentafluoropyridine (27.6 mmol) and  $K_2CO_3$  (27.6 mmol). The recovered material was purified using flash column chromatography (100% hexanes to 100% toluene) as a clear crystalline solid (6.60 g) in 95% yield.

$^1H$  NMR (400 MHz,  $CDCl_3$ )  $\delta$  7.25 (d,  $J = 8.9$ , 4H, ArH), 7.00 (d,  $J = 8.9$ , 4H, ArH), 1.71 (s, 6H,  $CH_3$ ).

$^{19}F\{^1H\}$  NMR (376 MHz,  $CDCl_3$ )  $\delta$  -88.21 – -89.29 (m), -153.66 – -155.02 (m).

$^{13}C\{^1H\}$  NMR (101 MHz,  $CDCl_3$ )  $\delta$  153.87, 147.24, 145.65 – 145.11 (m), 144.74 – 144.29 (m), 137.83 – 137.20 (m), 135.19 – 134.63 (m), 128.32, 116.27, 42.39, 30.89.

HRMS  $ESI^-$  Calculated for  $[M-H]^- C_{25}H_{13}N_2O_2F_8^- = 525.0849$ . Found = 525.0851.

MP 86 – 88 °C.

**Synthesis of 4,4'-((sulfonylbis(4,1-phenylene))bis(oxy))bis(2,3,5,6-tetrafluoropyridine) (33)**

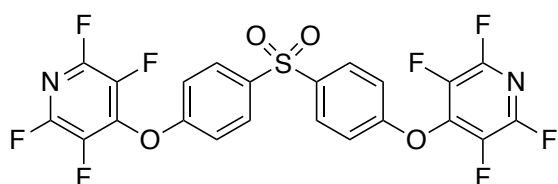

The title compound was synthesized according to the general procedure for the synthesis of tetrafluoropyridyl ethers from 0.4 mmol of 4,4'-sulfonyldiphenol, pentafluoropyridine (0.88 mmol) and  $K_2CO_3$  (0.88 mmol). This gave the desired product as a clear crystalline solid (0.199 g) in 91% yield.

$^1H$  NMR (400 MHz,  $CDCl_3$ )  $\delta$  8.00 (d,  $J = 8.9$ , 4H, ArH), 7.18 (d,  $J = 8.9$ , 4H, ArH).

$^{19}F\{^1H\}$  NMR (376 MHz,  $CDCl_3$ )  $\delta$  -86.87 – -87.08 (m), -152.92 – -153.13 (m).

$^{13}C\{^1H\}$  NMR (101 MHz,  $CDCl_3$ )  $\delta$  158.89, 145.68 – 145.03 (m), 143.23 – 142.40 (m), 137.84, 137.70 – 137.05 (m), 135.24 – 134.47 (m), 130.32, 117.06.

HRMS ESI<sup>-</sup> Calculated for [M-H]<sup>-</sup> C<sub>22</sub>H<sub>7</sub>N<sub>2</sub>O<sub>4</sub>F<sub>8</sub>S<sup>-</sup> = 546.9999. Found = 546.9976.

MP 181 – 182 °C.

### Synthesis of 2,6-diiodo-4-(2'-{4''-[(2''',3''',5''',6'''-tetrafluoropyridin-4''-yl)oxy]phenyl}propan-2'-yl)phenol (34)

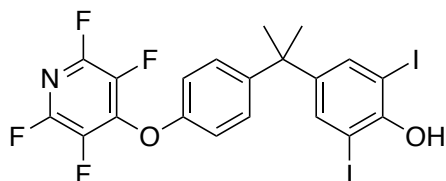

To a solution of 2-iodo-4-(2-{4-[(2,3,5,6-tetrafluoropyridin-4-yl)oxy]phenyl}propan-2-yl)phenol (0.600 g 1.19 mmol) in TFA (1 mL) was added NIS (0.295 g, 1.31 mmol) and the resulting

reaction mixture stirred at room temperature for 3 h. After this time the reaction mixture was concentrated under reduced pressure and then directly to flash column chromatography (100% hexanes to 100% toluene). This gave the target compound as a colorless crystalline solid (0.425 g) in a 57% yield.

<sup>1</sup>H NMR (400 MHz, CDCl<sub>3</sub>) δ 7.50 (s, 2H, ArH), 7.22 (d, *J* = 9.0, 2H, ArH), 7.00 (d, *J* = 9.0, 2H, ArH), 5.66 (brs, 1H, OH), 1.64 (s, 6H, CH<sub>3</sub>).

<sup>19</sup>F{<sup>1</sup>H} NMR (376 MHz, CDCl<sub>3</sub>) δ -88.50 – -88.71 (m), -154.09 – -154.30 (m).

<sup>13</sup>C{<sup>1</sup>H} NMR (176 MHz, CDCl<sub>3</sub>) δ 153.93, 151.66, 146.51, 146.40, 144.96 – 144.73 (m), 144.56 – 144.37 (m), 143.58 – 143.35 (m), 137.64, 137.03 – 136.77 (m), 135.53 – 135.28 (m), 128.19, 116.40, 82.11, 41.75, 30.81.

IR ν<sub>max</sub> (ATR)/cm<sup>-1</sup> 1643, 1591, 1489, 1248, 1076, 740.

HRMS ESI<sup>-</sup> Calculated for [M-H]<sup>-</sup> C<sub>20</sub>H<sub>12</sub>NO<sub>2</sub>F<sub>4</sub>I<sub>2</sub><sup>-</sup> = 627.8894. Found = 627.8912.

MP 141 – 143 °C.

### Synthesis of 2,3,5,6-tetrafluoro-4-(4'-isopropyl-2'-methylphenoxy)pyridine (35)

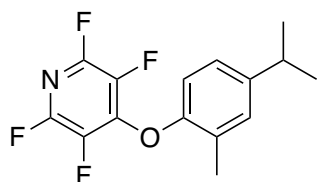

The title compound was synthesized according to the general procedure for the synthesis of tetrafluoropyridyl ethers from 1.33 mmol of carvacrol, pentafluoropyridine (1.40 mmol) and  $K_2CO_3$  (1.40 mmol). The solution was filtered and concentrated to give the desired product as a clear crystalline solid (0.392 g) in 99% yield.

$^1H$  NMR (400 MHz,  $CDCl_3$ )  $\delta$  7.21 (d,  $J = 7.8$ , 1H, ArH), 7.04 (dd,  $J = 7.8$ , 1.6, 1H, ArH), 6.72 (s, 1H, ArH), 2.87 (hept,  $J = 6.9$ , 1H, ArCH(CH<sub>3</sub>)<sub>2</sub>), 2.34 (s, 3H, ArCH<sub>3</sub>), 1.23 (d,  $J = 6.9$ , 6H, CH(CH<sub>3</sub>)<sub>2</sub>).

$^{19}F\{^1H\}$  NMR (376 MHz,  $CDCl_3$ )  $\delta$  -89.10 – -89.41 (m), -155.90 – -156.15 (m).

$^{13}C\{^1H\}$  NMR (101 MHz,  $CDCl_3$ )  $\delta$  154.13, 148.75, 145.67 – 145.10 (m), 143.30 – 142.76 (m), 137.32 – 136.74 (m), 134.76 – 134.12 (m), 131.53, 125.18, 123.33, 114.23, 33.71, 23.87, 15.48.

HRMS ESI<sup>-</sup> Calculated for [M-H]<sup>-</sup> C<sub>15</sub>H<sub>12</sub>NOF<sub>4</sub><sup>-</sup> = 298.0855. Found = 298.0845.

MP 71 – 72 °C.

### Synthesis of 2,3,5,6-tetrachloro-4-(4'-isopropyl-2'-methylphenoxy)pyridine (36)

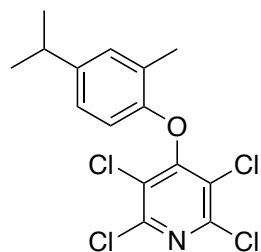

The title compound was synthesized according to the general procedure for the synthesis of tetrachloropyridyl ethers from 0.67 mmol of the corresponding phenol. Purified by flash column chromatography 100% hexanes to 90% hexanes 10% EtOAc. This gave the product as a clear crystalline solid (0.157 g) in 65% yield.

$^1H$  NMR (400 MHz,  $CDCl_3$ )  $\delta$  7.22 (d,  $J = 7.7$ , 1H, ArH), 6.96 (dd,  $J = 7.7$ , 1.5, 1H, ArH), 6.19 (d,  $J = 1.5$ , 1H, ArH), 2.78 (hept,  $J = 6.9$ , 1H, ArCH(CH<sub>3</sub>)<sub>2</sub>), 2.39 (s, 3H, ArCH<sub>3</sub>), 1.18 (d,  $J = 6.9$ , 6H, CH(CH<sub>3</sub>)<sub>2</sub>).

$^{13}C\{^1H\}$  NMR (101 MHz,  $CDCl_3$ )  $\delta$  158.11, 153.41, 148.50, 147.16, 131.63, 125.23, 124.43, 121.57, 111.47, 33.72, 23.92, 15.80.

HRMS ESI<sup>+</sup> Calculated for [M+H]<sup>+</sup> C<sub>15</sub>H<sub>14</sub>NOCl<sub>4</sub><sup>+</sup> = 363.9830. Found = 363.9832

MP 131 – 132 °C.

### Synthesis of 2-((perfluoropyridin-4'-yl)oxy)benzaldehyde (37)

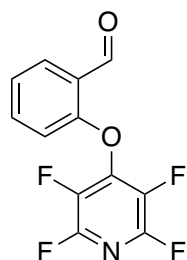

The title compound was synthesized according to the general procedure for the synthesis of tetrafluoropyridyl ethers from 1.64 mmol of salicylaldehyde, pentafluoropyridine (1.72 mmol) and  $K_2CO_3$  (1.72 mmol). The solution was filtered and concentrated to give the desired product as a white crystalline solid (0.426 g) in 96% yield.

$^1H$  NMR (400 MHz,  $CDCl_3$ )  $\delta$  10.51 (d,  $J = 0.6$ , 1H, ArC(O)H), 8.00 (dd,  $J = 7.7$ , 1.8, 1H, ArH), 7.63 (ddd,  $J = 8.3$ , 7.4, 1.8, 1H, ArH), 7.44 – 7.35 (m, 1H, ArH), 7.01 – 6.94 (m, 1H, ArH).

$^{19}F\{^1H\}$  NMR (376 MHz,  $CDCl_3$ )  $\delta$  -87.54 – -87.83 (m), -154.20 – -154.42 (m).

$^{13}C\{^1H\}$  NMR (101 MHz,  $CDCl_3$ )  $\delta$  187.70, 145.59 – 145.18 (m), 143.89 – 143.56 (m), 143.18 – 142.75 (m), 137.56 – 137.08 (m), 135.86, 134.93 – 134.44 (m), 130.29, 126.04, 125.72, 116.43.

HRMS ESI<sup>+</sup> Calculated for  $[M+H]^+$   $C_{12}H_6NO_2F_4^+$  = 272.0335. Found = 272.0324.

MP 105 – 106 °C.

### Synthesis of 2,3,5,6-tetrachloro-4-(3'-fluorophenoxy)pyridine (38)

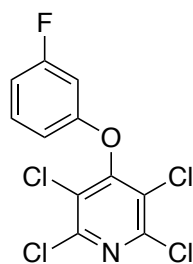

The title compound was synthesized according to the general procedure for the synthesis of tetrachloropyridyl ethers from 1.79 mmol of the corresponding phenol. Purified by flash column chromatography 100% hexanes to 90% hexanes 10% EtOAc. This gave the product as a brown crystalline solid (0.525 g) in 90% yield.

$^1H$  NMR (400 MHz,  $CDCl_3$ )  $\delta$  7.38 – 7.26 (m, 1H, ArH), 6.96 – 6.85 (m, 1H, ArH), 6.73 – 6.58 (m, 2H, ArH).

$^{19}F\{^1H\}$  NMR (376 MHz,  $CDCl_3$ )  $\delta$  -109.64 (s).

$^{13}C\{^1H\}$  NMR (101 MHz,  $CDCl_3$ )  $\delta$  163.54 (d,  $J = 248.6$ ), 156.79, 155.96 (d,  $J = 10.8$ ), 147.36, 130.95 (d,  $J = 9.6$ ), 125.53, 111.18 (d,  $J = 21.2$ ), 110.91 (d,  $J = 3.3$ ), 103.93 (d,  $J = 25.9$ ).

HRMS ESI<sup>+</sup> Calculated for  $[M+H]^+$   $C_{11}H_5NOFCl_4^+$  = 325.9109. Found = 325.9121.

MP 92 – 93 °C.

**Synthesis of (4*bR*,8*aS*,9*S*)-3,7-dimethoxy-11-methyl-4-((2',3',5',6'-tetrafluoropyridin-4'-yl)oxy)-9,10-dihydro-5*H*-9,4*b*-(epiminoethano)phenanthren-6(8*aH*)-one (39)**

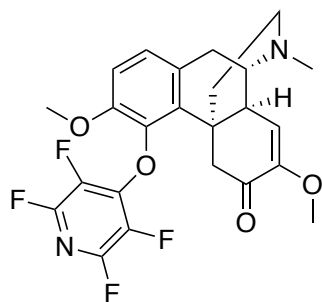

The title compound was synthesized according to the general procedure for the synthesis of tetrafluoropyridyl ethers from 0.054 mmol of sinomenine hydrochloride, pentafluoropyridine (0.060 mmol) and  $K_2CO_3$  (0.119 mmol). The solution was then passed through a short silica plug (100% EtOAc) to give the desired product as a clear crystalline solid

(0.026 g) in 99% yield.

$^1H$  NMR (700 MHz,  $CDCl_3$ )  $\delta$  6.89 (d,  $J = 8.4$ , 1H), 6.70 (d,  $J = 8.4$ , 1H), 5.42 (s, 1H), 3.61 (d,  $J = 16.1$ , 1H), 3.58 (s, 1H), 3.44 (s, 3H), 3.23 (brs, 1H), 3.08 (brs, 1H), 3.02 (d,  $J = 18.2$ , 1H), 2.78 (brd,  $J = 17.3$ , 1H), 2.60 (brs, 1H), 2.51 (d,  $J = 16.2$ , 1H), 2.44 (s, 2H), 2.06 (brt,  $J = 11.4$ , 1H), 2.00 – 1.93 (m, 1H), 1.77 (d,  $J = 12.6$ , 1H).

$^{19}F\{^1H\}$  NMR (376 MHz,  $CDCl_3$ )  $\delta$  -90.17 – -90.42 (m), -91.14 – -91.41 (m), -156.65 – -157.08 (m), -160.69 – -160.96 (m).

$^{13}C\{^1H\}$  NMR (101 MHz,  $CDCl_3$ )  $\delta$  191.98, 152.67, 142.76, 130.31, 128.67, 125.44, 114.69, 110.78, 56.36, 55.97, 54.97, 50.34, 46.74, 45.81, 42.69, 41.03, 36.90, 24.29, 22.87. Note: not all fluoropyridyl carbons could be observed due to their intensity.

HRMS ESI<sup>+</sup> Calculated for  $[M-H]^+ C_{24}H_{23}N_2O_4F_4^+ = 479.1594$ . Found = 479.1592.

MP 146 – 147 °C.

**Synthesis of (1S,10R,11S,15S)-15-methyl-5-[(2',3',5',6'-tetrafluoropyridin-4'-yl)oxy]tetracyclo[8.7.0.0<sup>2,7</sup>.0<sup>11,15</sup>]heptadeca-2(7),3,5-trien-14-one (40)**

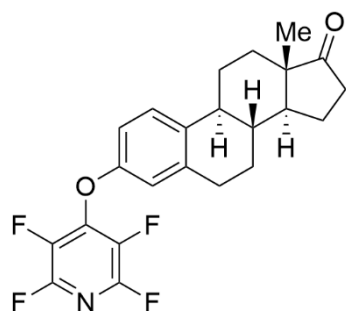

The title compound was synthesized according to the general procedure for the synthesis of tetrafluoropyridyl ethers from 1.85 mmol of estrone with the following modification. Due to the solubility of estrone in MeCN, 1 mL of DMF was added to the reaction mixture and the reaction mixture heated at 70 °C for 2 h. The reaction mixture was concentrated under reduced pressure and the residue purified by flash column chromatography (100% hexanes to 90% hexanes 10% EtOAc). This gave the title compound as a white crystalline solid (0.676 g) in 87% yield.

<sup>1</sup>H NMR (400 MHz, CDCl<sub>3</sub>) δ 7.30 (d, *J* = 8.6, 1H), 6.86 (dd, *J* = 8.6, 2.7, 1H), 6.80 (d, *J* = 2.7, 1H), 3.06 – 2.86 (m, 2H), 2.61 – 2.49 (m, 1H), 2.46 – 2.39 (m, 1H), 2.35 – 2.26 (m, 1H), 2.24 – 1.97 (m, 4H), 1.73 – 1.42 (m, 7H), 0.95 (s, 3H).

<sup>19</sup>F{<sup>1</sup>H} NMR (376 MHz, CDCl<sub>3</sub>) δ -88.67 – -88.96 (m), -154.29 – -154.48 (m).

<sup>13</sup>C{<sup>1</sup>H} NMR (176 MHz, CDCl<sub>3</sub>) δ 220.51, 153.85, 144.95 – 144.70 (m), 144.68 – 144.48 (m), 143.56 – 143.33 (m), 138.76, 137.08 – 136.83 (m), 136.73, 135.59 – 135.33 (m), 126.87, 116.52, 113.85, 50.38, 47.89, 44.00, 37.98, 35.80, 31.50, 29.45, 26.24, 25.77, 21.55, 13.81.

HRMS ESI<sup>-</sup> Calculated for [M-H]<sup>-</sup> C<sub>23</sub>H<sub>20</sub>NO<sub>2</sub>F<sub>4</sub><sup>-</sup> = 418.1430. Found = 418.1432.

MP 153 – 154 °C.

**Synthesis of (8R,9S,13S,14S)-13-methyl-3-((2',3',5',6'-tetrafluoropyridin-4'-yl)oxy)-6,7,8,9,11,12,13,14,15,16-decahydro-17H-cyclopenta[*a*]phenanthren-17-one (41)**

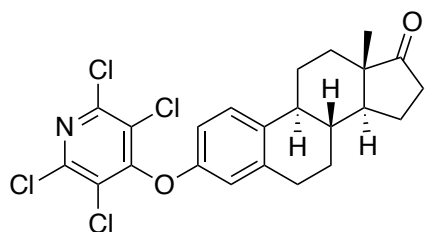

The title compound was synthesized according to the general procedure for the synthesis of tetrachloropyridyl ethers from 0.37 mmol of the corresponding phenol. Purified by flash

column chromatography 100% hexanes to 50% hexanes 50% EtOAc. This gave the product as a white crystalline solid (0.120 g) in 67% yield.

$^1\text{H}$  NMR (400 MHz,  $\text{CDCl}_3$ )  $\delta$  7.26 (d,  $J = 8.5$ , 1H), 6.64 (dd,  $J = 8.5$ , 2.8, 1H), 6.57 (d,  $J = 2.8$ , 1H), 2.94 – 2.86 (m, 2H), 2.53 (dd,  $J = 18.9$ , 8.5, 1H), 2.44 – 2.37 (m, 1H), 2.29 (td,  $J = 10.7$ , 4.4, 1H), 2.23 – 1.95 (m, 4H), 1.72 – 1.41 (m, 6H), 0.94 (s, 3H).

$^{13}\text{C}\{^1\text{H}\}$  NMR (101 MHz,  $\text{CDCl}_3$ )  $\delta$  157.50, 153.26, 147.16, 138.80, 135.59, 126.93, 125.71, 115.24, 112.68, 50.43, 47.95, 44.02, 38.05, 35.86, 31.55, 29.54, 26.32, 25.79, 21.60, 13.86.

HRMS ESI<sup>+</sup> Calculated for  $[\text{M}+\text{H}]^+$   $\text{C}_{23}\text{H}_{22}\text{NO}_2\text{Cl}_4^+$  = 484.0405. Found = 484.0409.

MP 211 – 213 °C.

### Synthesis of (1S,10R,11S,15S)-15-methyl-5-[(2',3',5',6'-tetrafluoropyridin-4'-yl)oxy]tetracyclo[8.7.0.0<sup>2,7</sup>.0<sup>11,15</sup>]heptadeca-2(7),3,5-trien-14-ol (42)

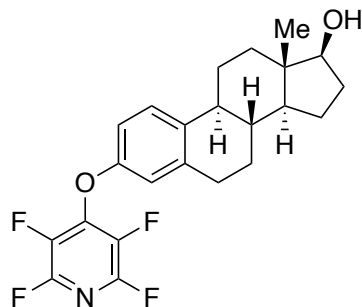

To a solution of TFP protected **40** (0.10 g, 0.24 mmol) in THF (10 mL) was added sodium borohydride (0.023 g, 0.60 mmol) and the reaction mixture stirred at rt for 24 h. The reaction mixture was quenched by the addition of water (5 mL) and then concentrated under reduced pressure. The recovered residue was taken up in

EtOAc (30 mL) and washed with water (30 mL) and then brine (30 mL). The organic fraction was dried over  $\text{MgSO}_4$ , filtered and concentrated under reduced pressure. This gave the title compound as a white crystalline solid (0.091 g) in 90% yield.

$^1\text{H}$  NMR (600 MHz,  $\text{CDCl}_3$ )  $\delta$  7.26 (d,  $J = 8.6$ , 1H, ArH), 6.80 (dd,  $J = 8.6$ , 2.8, 1H, ArH), 6.74 (d,  $J = 2.8$ , 1H, ArH), 3.73 (t,  $J = 8.5$  Hz, 1H, CH), 2.89 – 2.79 (m, 2H,  $\text{CH}_2$ ), 2.34 – 2.27 (m, 1H, CH), 2.25 – 2.17 (m, 1H, CH), 2.16 – 2.08 (m, 1H, CH), 1.96 (dt,  $J = 12.6$ , 3.4, 2H,  $\text{CH}_2$ ), 1.92 – 1.86 (m, 1H, CH), 1.75 – 1.65 (m, 1H, CH), 1.55 – 1.16 (m, 8H), 0.78 (s, 3H,  $\text{CH}_3$ ).

$^{19}\text{F}\{^1\text{H}\}$  NMR (376 MHz,  $\text{CDCl}_3$ )  $\delta$  -88.82 – -89.09 (m), -154.29 – -154.55 (m).

$^{13}\text{C}\{^1\text{H}\}$  NMR (151 MHz,  $\text{CDCl}_3$ )  $\delta$  153.72, 145.09 – 144.80 (m), 144.79 – 144.51 (m), 143.50 – 143.16 (m), 138.98, 137.35, 137.26 – 136.94 (m), 135.52 – 135.17 (m), 126.84, 116.47, 113.68, 81.78, 50.02, 43.98, 43.18, 38.45, 36.61, 30.55, 29.58, 26.93, 26.17, 23.09, 11.02.

HRMS  $\text{ESI}^-$  Calculated for  $[\text{M}-\text{H}]^- \text{C}_{23}\text{H}_{22}\text{NO}_2\text{F}_4^- = 420.1587$ . Found = 420.1585.

MP 99 – 101 °C.

### Synthesis of (8*R*,9*S*,13*S*,14*S*,17*S*)-13-methyl-3-((2',3',5',6'-tetrachloropyridin-4'-yl)oxy)-7,8,9,11,12,13,14,15,16,17-decahydro-6*H*-cyclopenta[*a*]phenanthren-17-ol (43)

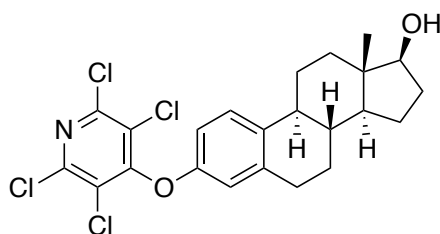

To a solution of compound **41** (0.023 g, 0.048 mmol) in THF (3 ml) was added  $\text{NaBH}_4$  (0.005 g, 0.12 mmol) and the resulting mixture stirred at RT for 5 h. After this time the reaction mixture was quenched by the addition of water (5 mL). The

resulting solution was concentrated under reduced pressure before being diluted with EtOAc (30 mL). This was then washed with water (50 mL) and brine (50 mL). The organic fraction was dried over  $\text{NaSO}_4$ , filtered, and then concentrated under reduced pressure to give the desired product as a white crystalline solid (0.021 g, 90%).

$^1\text{H}$  NMR (400 MHz,  $\text{CDCl}_3$ )  $\delta$  7.25 (d,  $J = 8.5$ , 1H), 6.62 (dd,  $J = 8.5, 2.8$ , 1H), 6.56 (d,  $J = 2.8$ , 1H), 3.76 (t,  $J = 8.5$ , 1H), 2.94 – 2.78 (m, 2H), 2.37 – 2.28 (m, 1H), 2.27 – 2.10 (m, 2H), 1.98 (dt,  $J = 12.5, 3.5$ , 1H), 1.94 – 1.87 (m, 1H), 1.79 – 1.65 (m, 1H), 1.58 – 1.18 (m, 8H), 0.81 (s, 3H).

$^{13}\text{C}\{^1\text{H}\}$  NMR (101 MHz,  $\text{CDCl}_3$ )  $\delta$  157.57, 153.13, 147.14, 139.03, 136.20, 126.90, 125.73, 115.21, 112.50, 81.84, 50.07, 44.00, 43.24, 38.53, 36.67, 30.60, 29.68, 27.02, 26.20, 23.14, 11.08.

HRMS  $\text{ESI}^+$  Calculated for  $[\text{M}+\text{H}]^+ \text{C}_{23}\text{H}_{24}\text{NO}_2\text{Cl}_4^+ = 486.0561$ . Found = 486.0551.

MP 204 – 206 °C.

# NMR Data for Synthesized Compounds

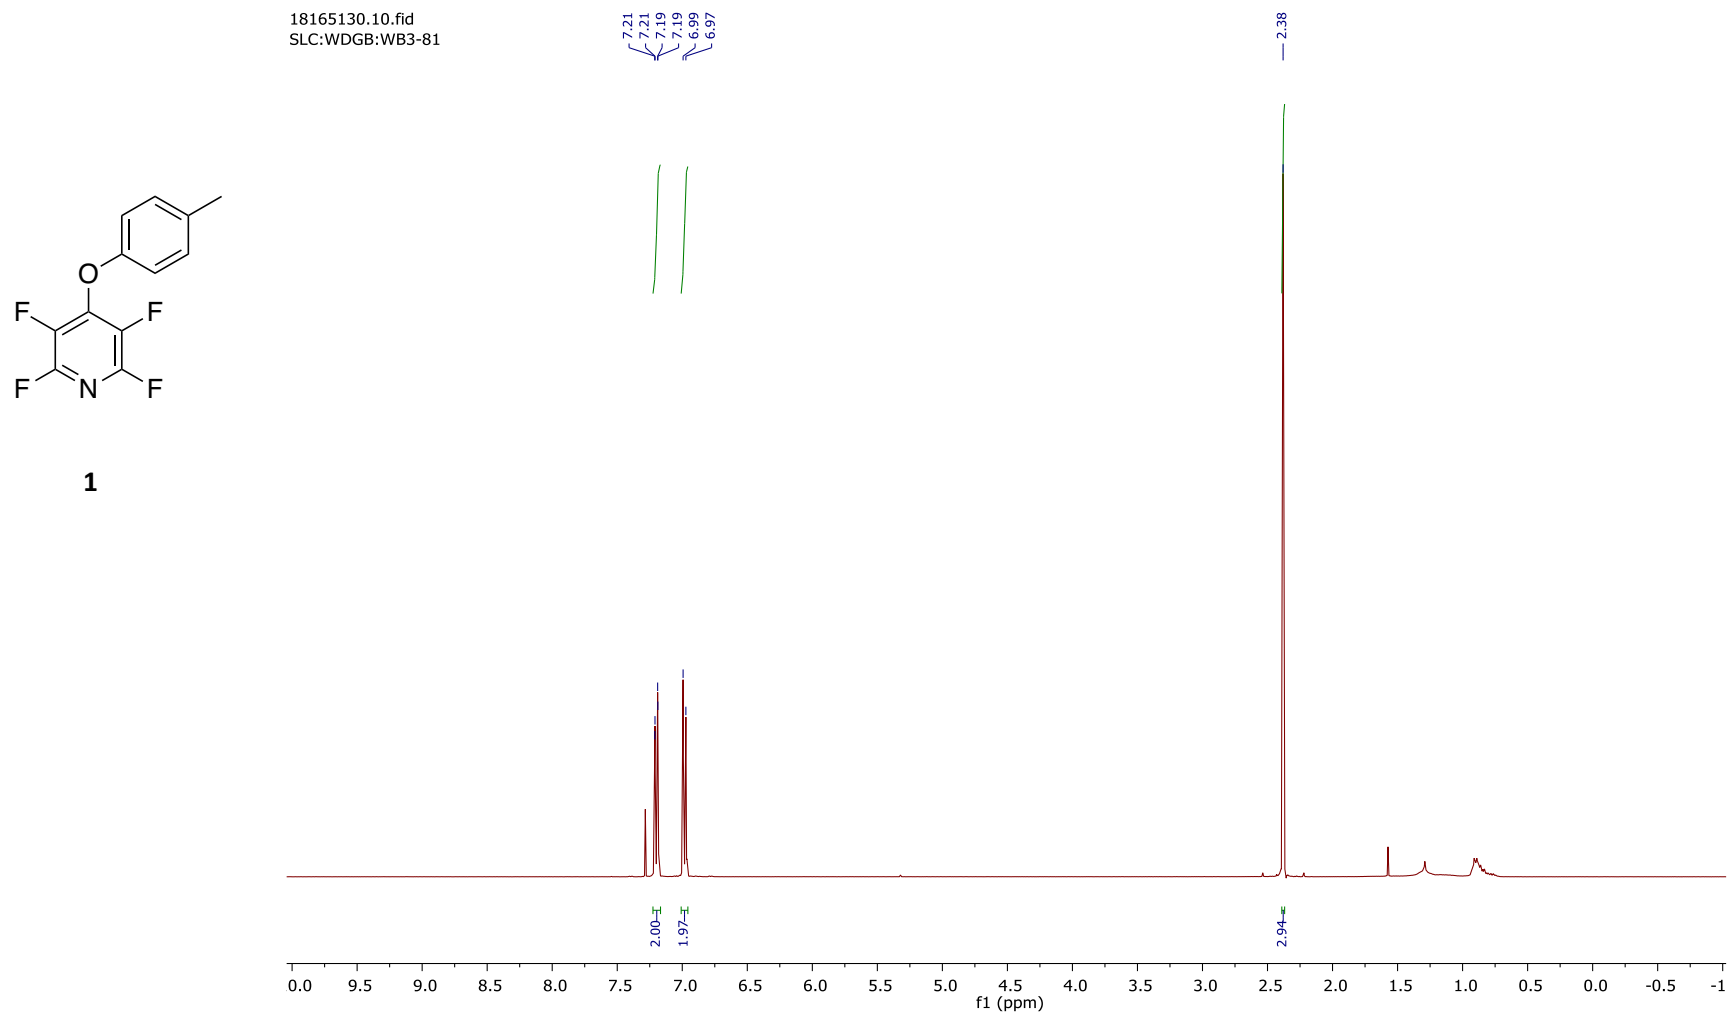

**Figure S1.**  $^1\text{H}$  NMR spectrum of **1** recorded at 400 MHz in  $\text{CDCl}_3$ . Peaks at 7.26 ppm and 1.56 ppm correspond to  $\text{CHCl}_3$  (in  $\text{CDCl}_3$ ) and water respectively.

18165130.13.fid  
SLC:WDGB:WB3-81

-88.89  
-88.93  
-88.97  
-88.98  
-89.02  
-89.06

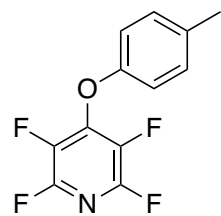

**1**

-154.57  
-154.61  
-154.65  
-154.70  
-154.74

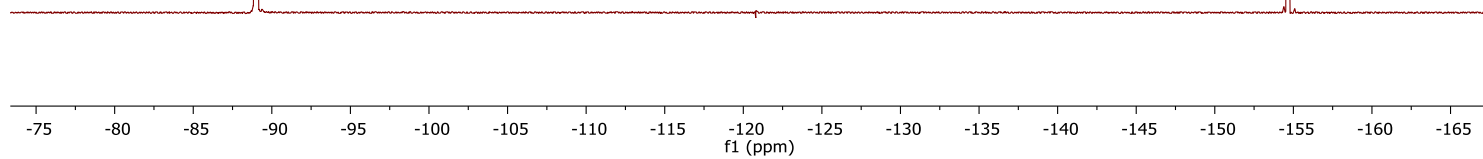

**Figure S2.**  $^{19}\text{F}\{^1\text{H}\}$  NMR spectrum of **1** recorded at 376 MHz in  $\text{CDCl}_3$ .

CARBON\_01  
SLC:WB:3-81

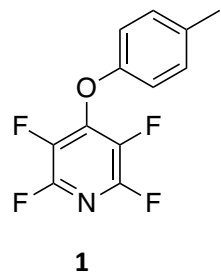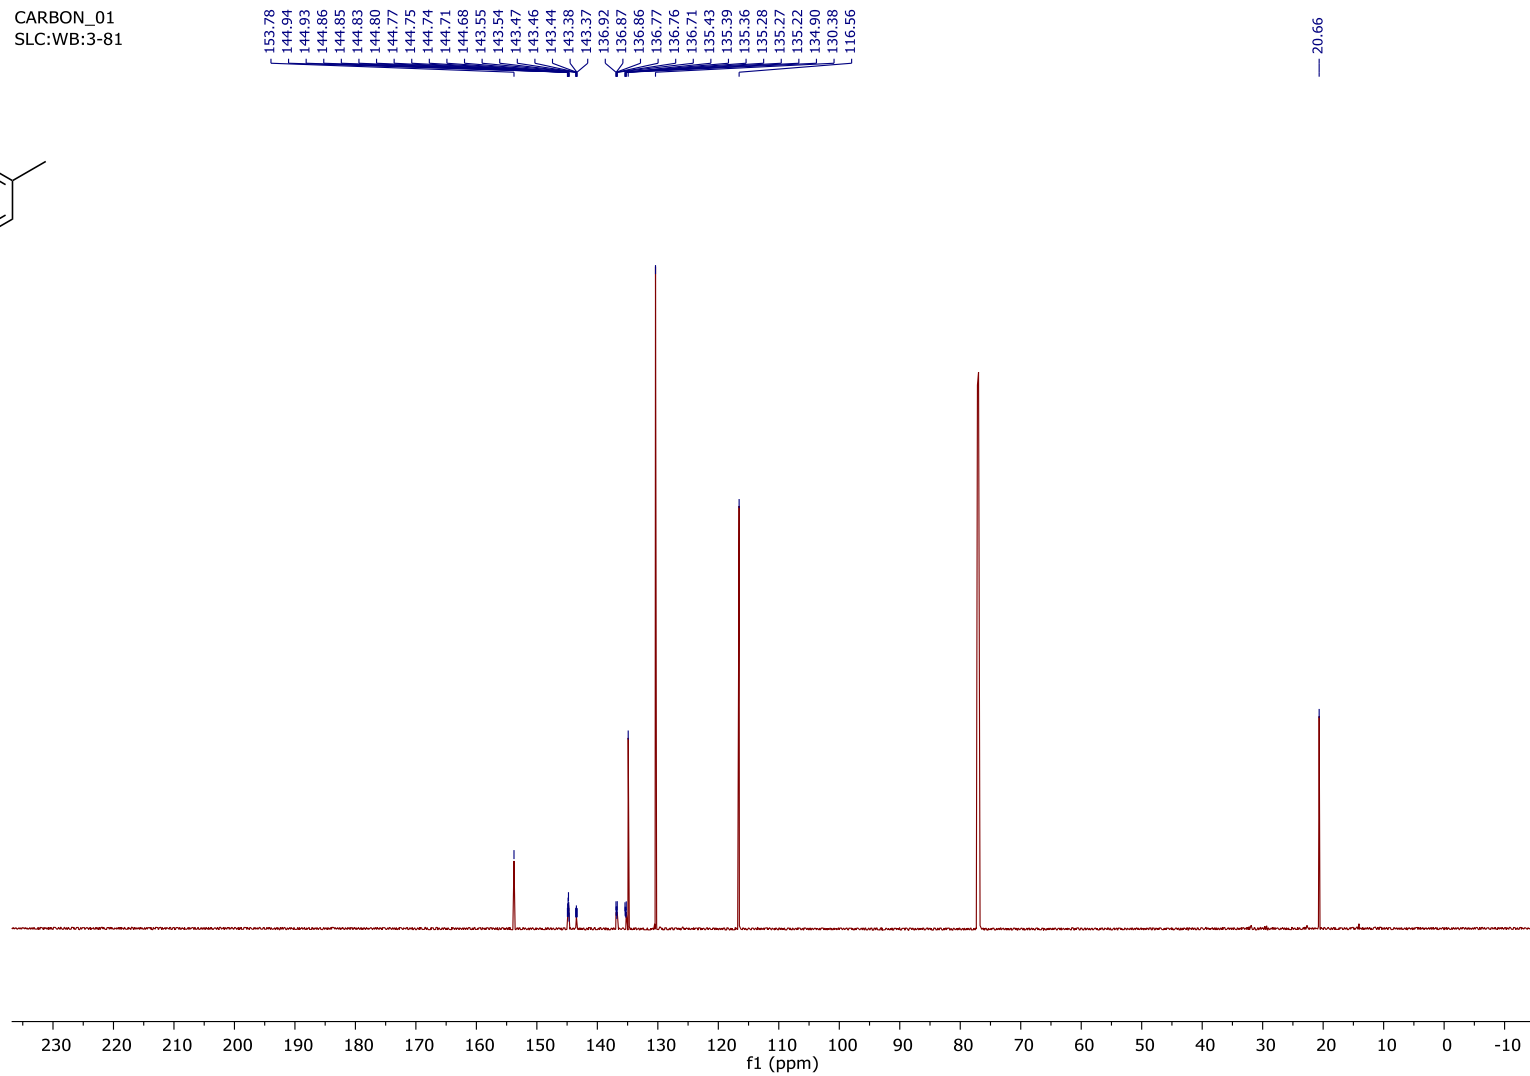

Figure S3.  $^{13}\text{C}\{^1\text{H}\}$  NMR spectrum of **1** recorded at 176 MHz in  $\text{CDCl}_3$ .

10120250.10.fid  
WDB-WDB-DEV-WB10-134  
Proton.dur CDCl3 /home/nmr/localdata walkup 46

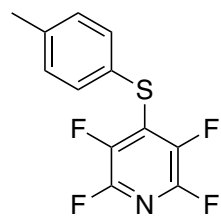

**2**

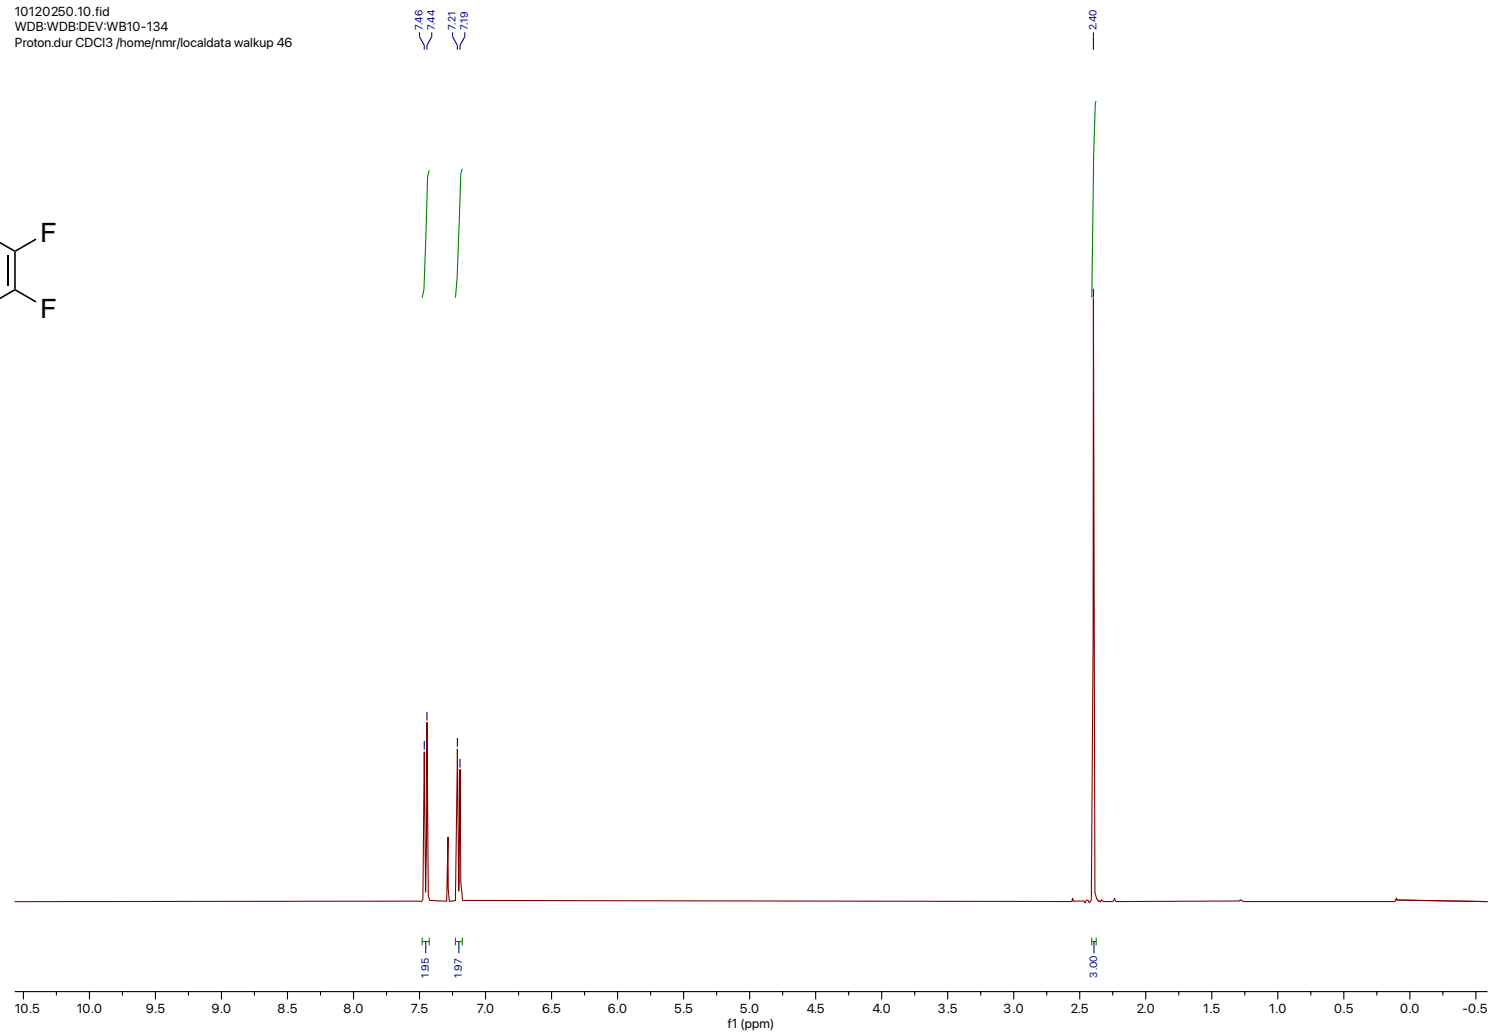

**Figure S4.** <sup>1</sup>H NMR spectrum of **2** recorded at 400 MHz in CDCl<sub>3</sub>.

10120250.13.fid  
WDB:WDB:DEV:WB10-134  
F19\_limits\_dec.dur CDCl3 /home/nmr/local/data/valkup/96

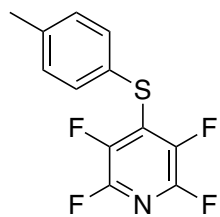

**2**

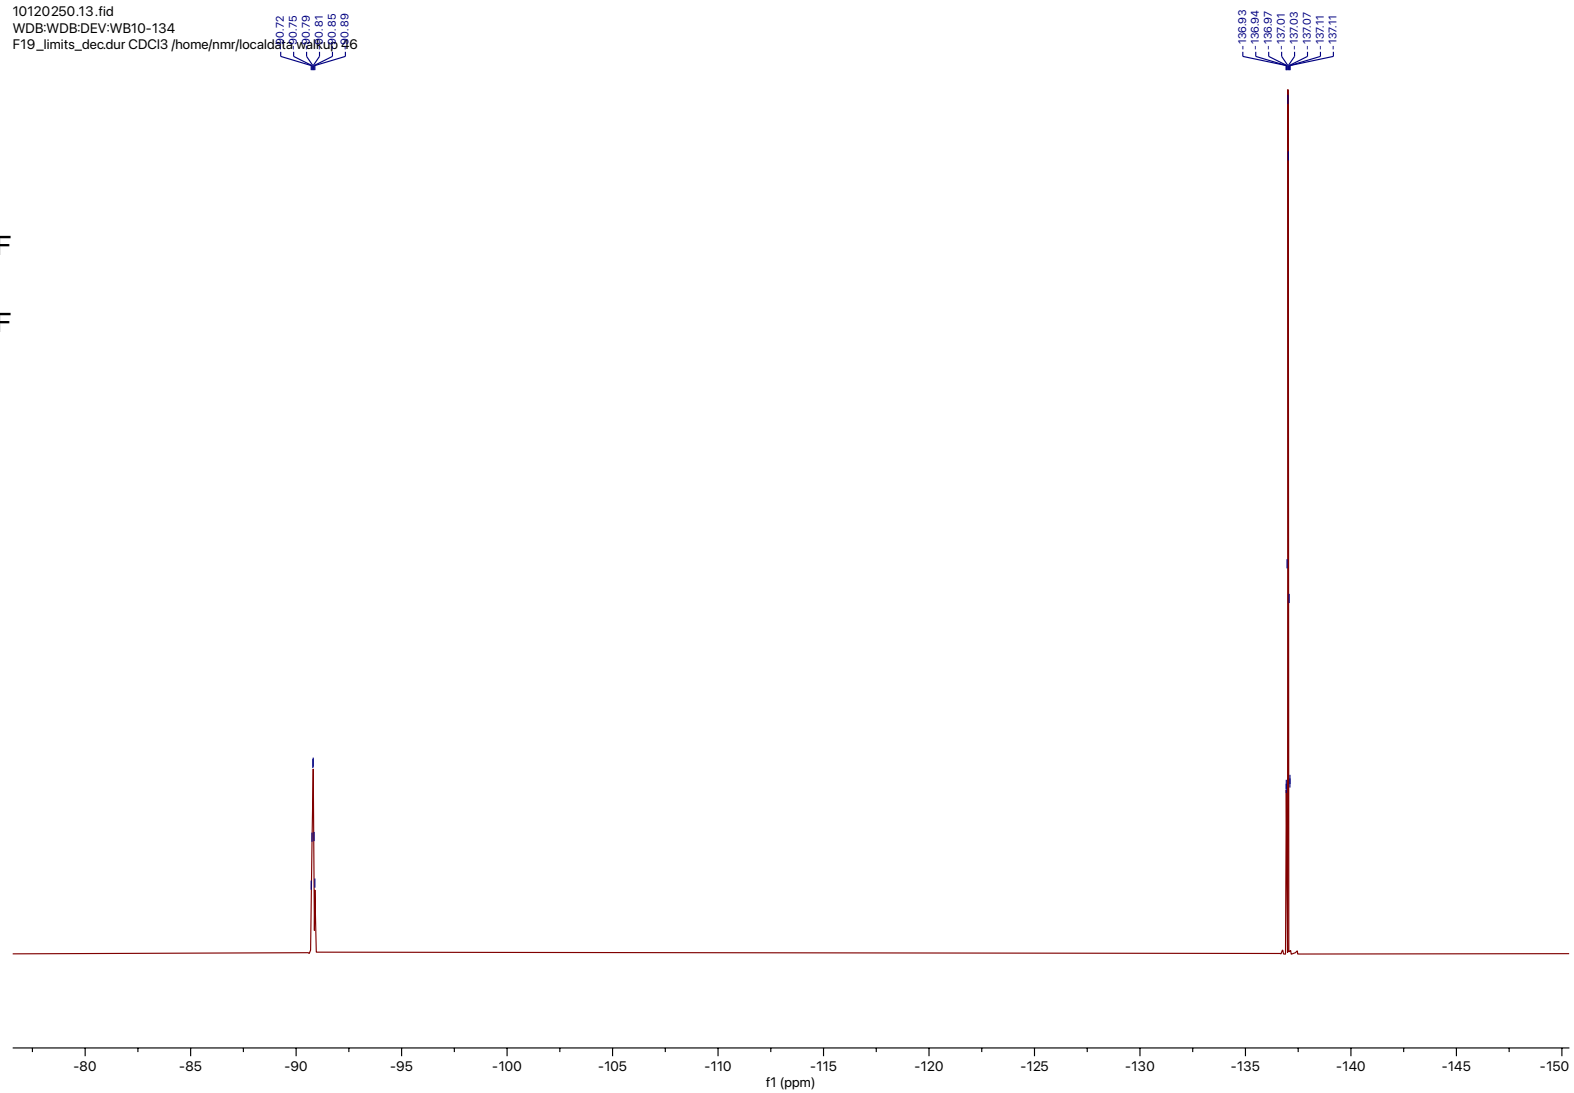

**Figure S5.**  $^{19}\text{F}\{^1\text{H}\}$  NMR spectrum of **2** recorded at 376 MHz in  $\text{CDCl}_3$ .

144.71  
142.27  
141.99  
140.12  
139.42  
138.84  
138.81  
131.81  
131.70  
131.67  
131.65  
131.54  
130.51  
126.34

77.34  
77.03  
76.71

21.26

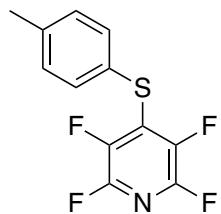

2

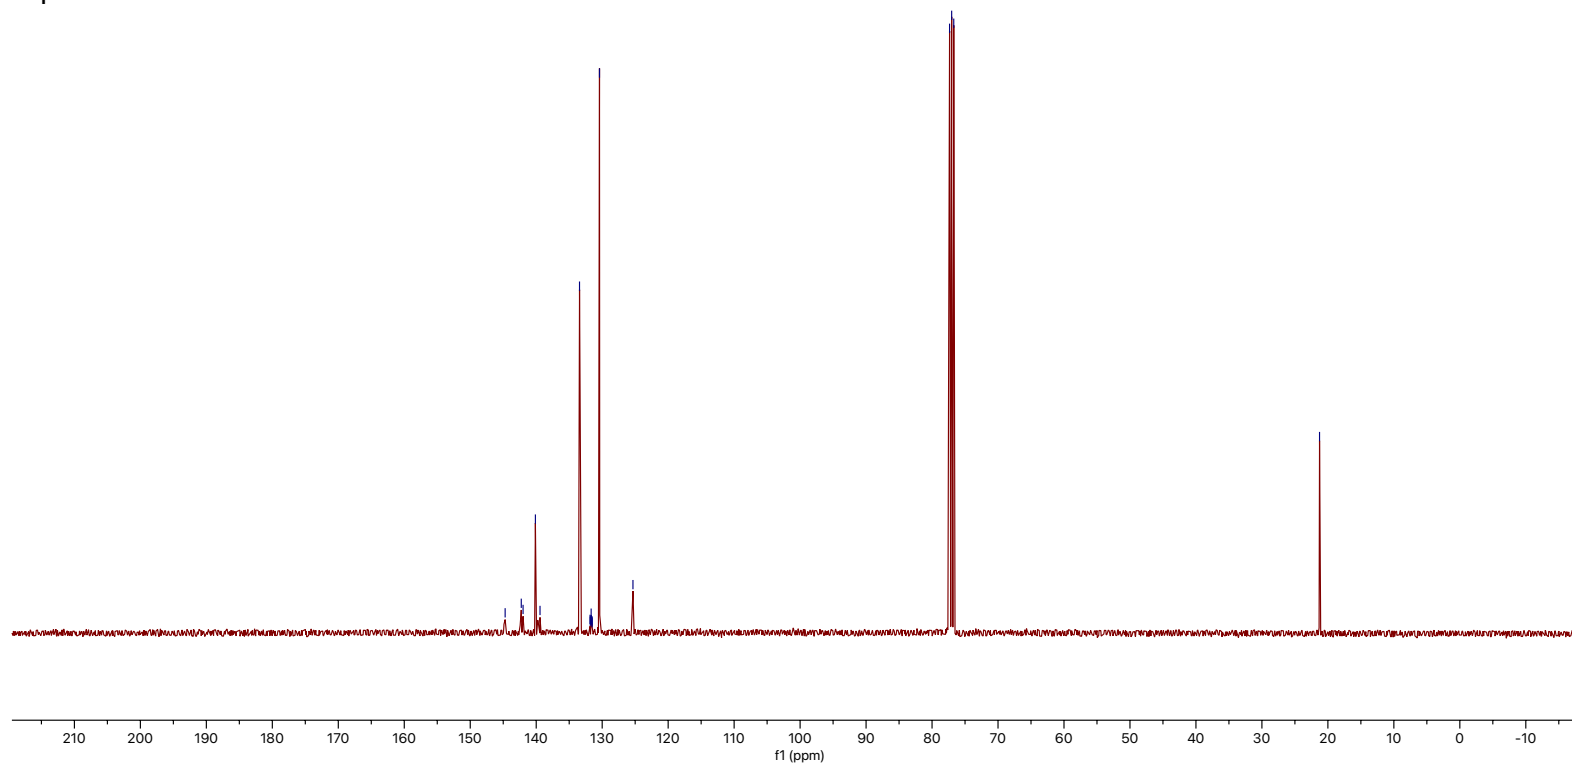

Figure S6.  $^{13}\text{C}\{^1\text{H}\}$  NMR spectrum of **2** recorded at 101 MHz in  $\text{CDCl}_3$ .

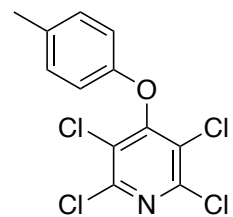

**3**

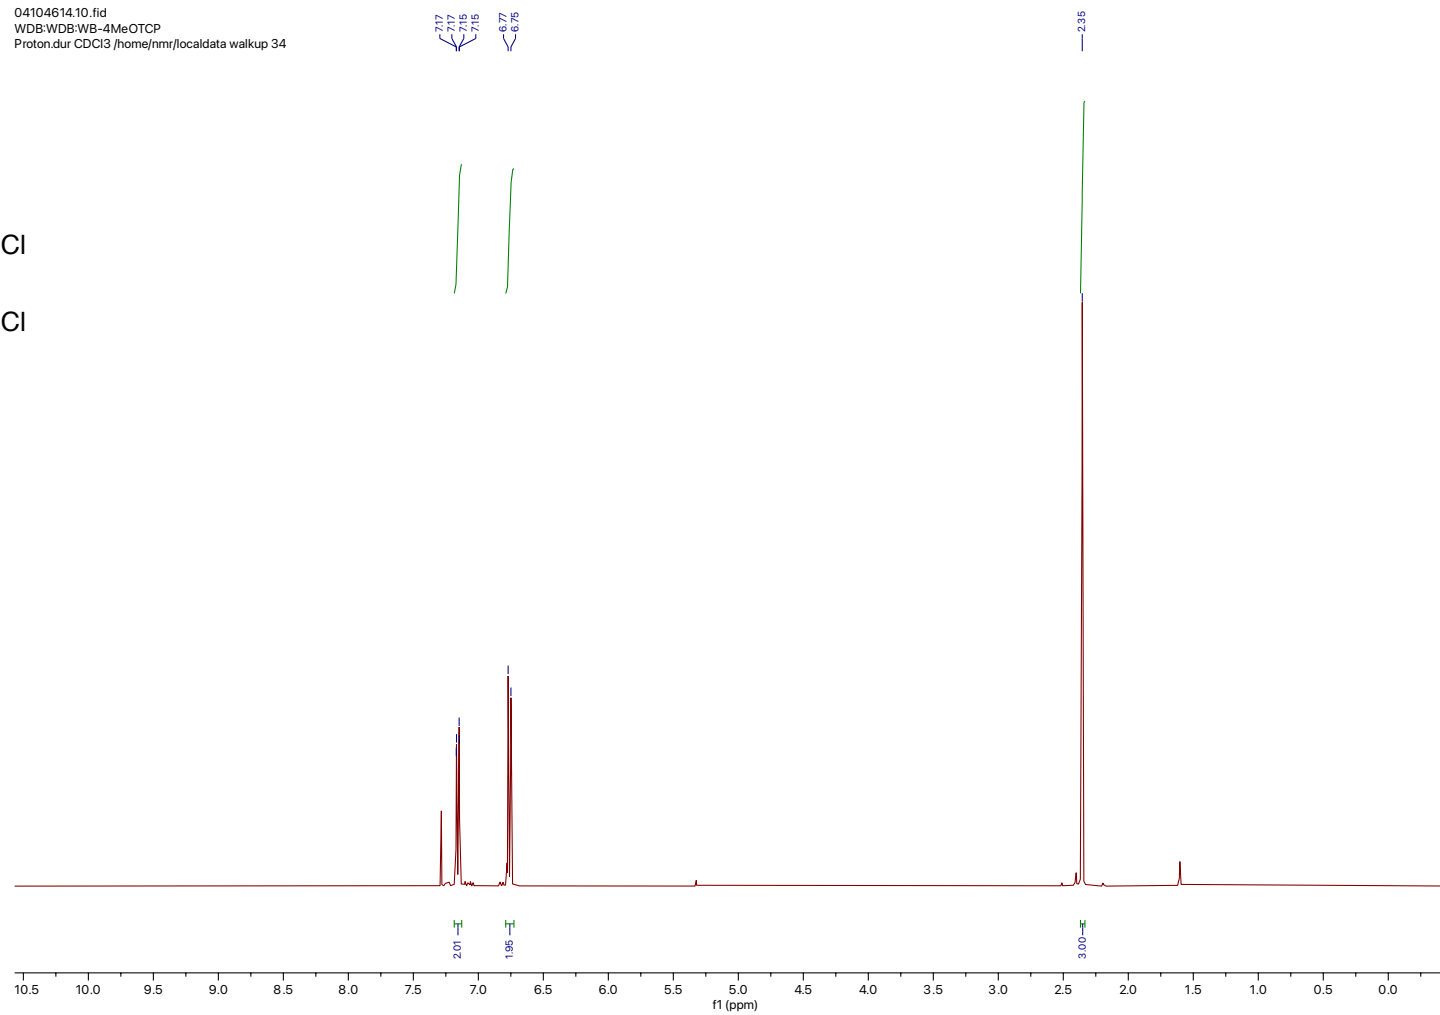

Figure S7.  $^1\text{H}$  NMR spectrum of **3** in  $\text{CDCl}_3$ .

04104614.11.fid  
WDB:WDB:WB-4MeOTCP  
Carbon.dur CDCl3 /home/nmr/localdata/walkup/34

157.61  
153.24  
147.18  
133.63  
130.47  
126.63  
115.24

20.65

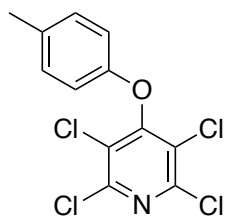

**3**

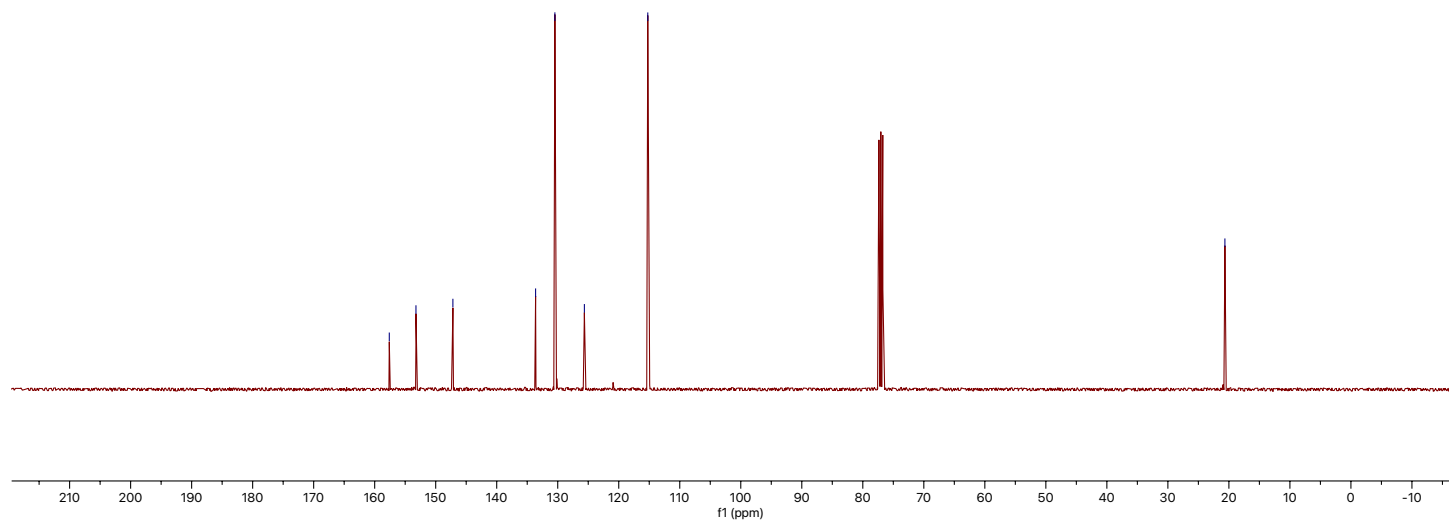

**Figure S8.**  $^{13}\text{C}\{^1\text{H}\}$  NMR spectrum of **3** recorded at 101 MHz in  $\text{CDCl}_3$ .

3114053210.fid  
WDB:WDB:WB-4MeSTCP  
Proton1.icon CDCl3 /home/nmr/localdata walkup 56

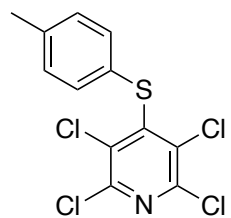

**4**

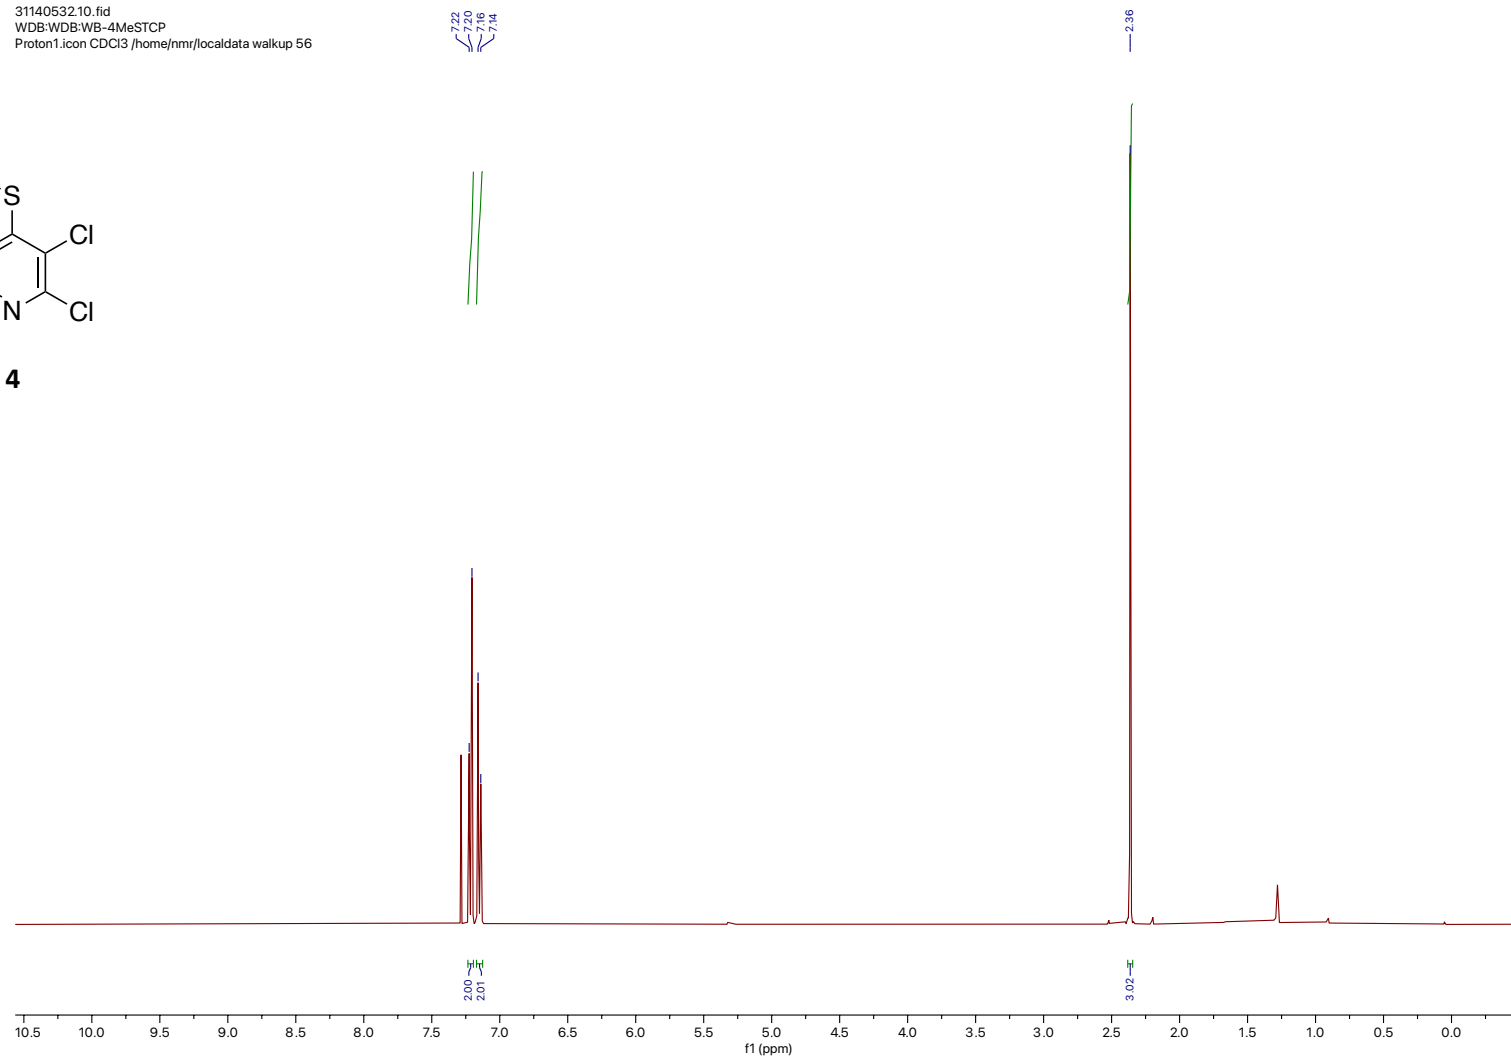

**Figure S9.**  $^1\text{H}$  NMR spectrum of **4** recorded at 400 MHz in  $\text{CDCl}_3$ .

31140532.11.fid  
WDB:WDB:WB-4MeSTCP  
Carbon.dur CDCl3 /home/nmr/localdata/walkup 56

148.25  
148.54  
138.76  
131.17  
133.70  
130.99  
128.92

21.21

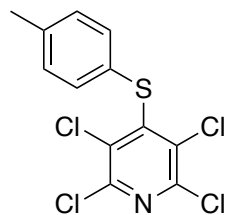

**4**

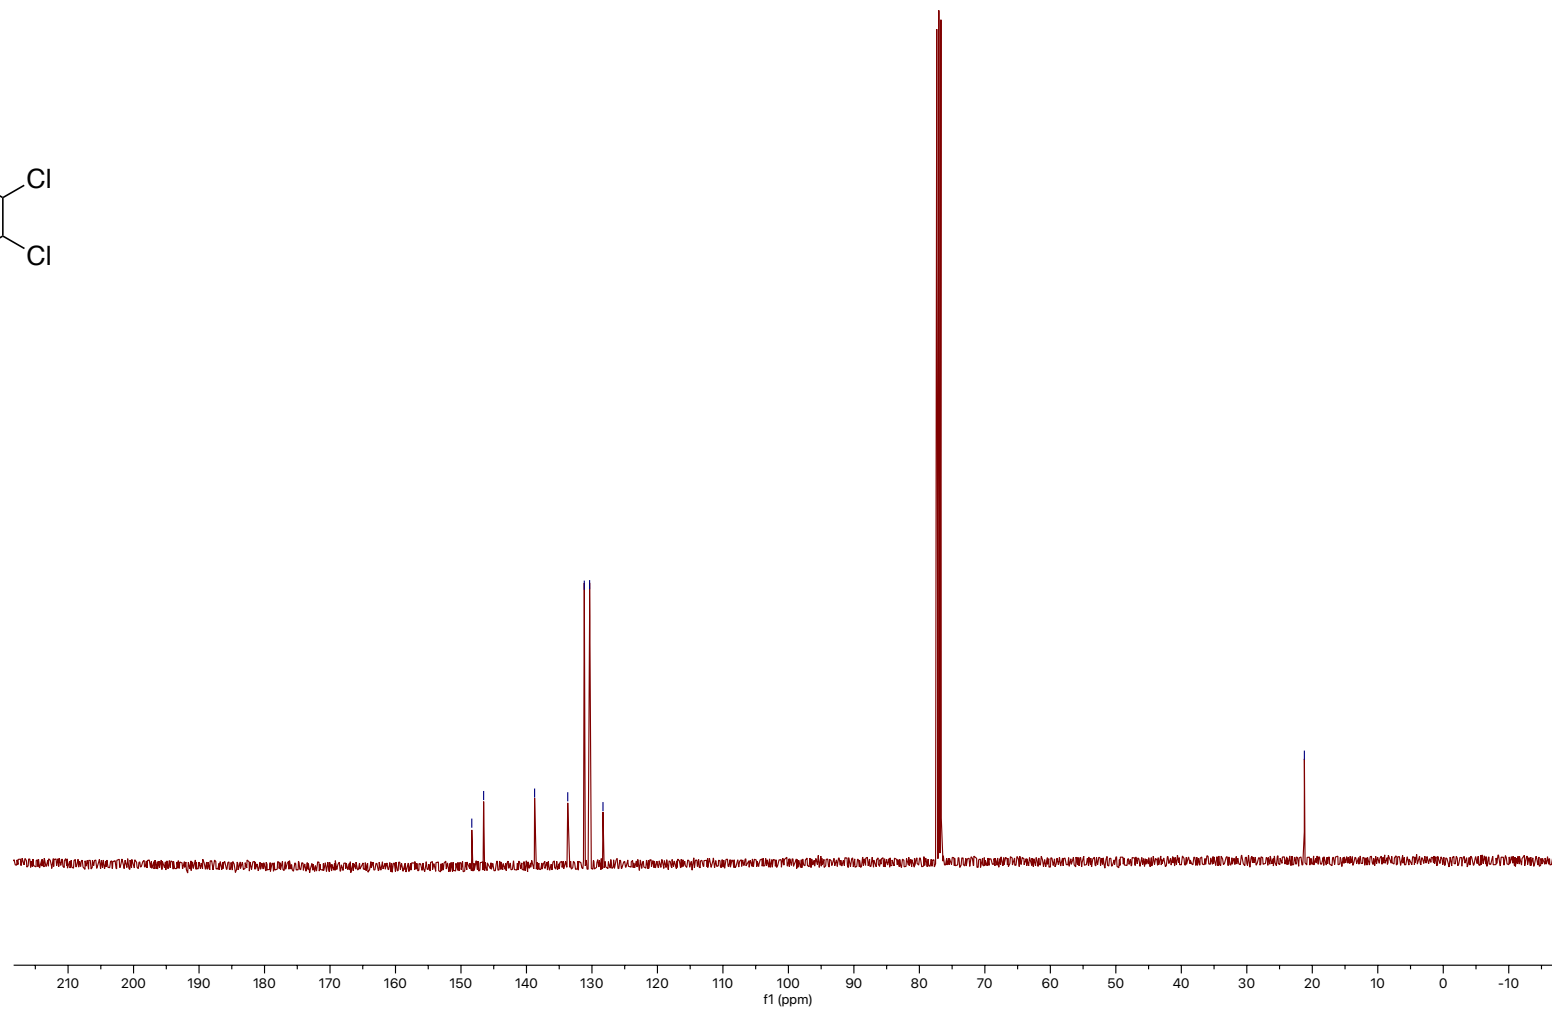

Figure S10.  $^{13}\text{C}\{^1\text{H}\}$  NMR spectrum of **4** recorded at 101 MHz in  $\text{CDCl}_3$ .

06154925.10.fid  
WDB:WDB:WB-4OMeOTFP  
Proton.dur CDCl3 /home/nmr/localdata/walkup/12

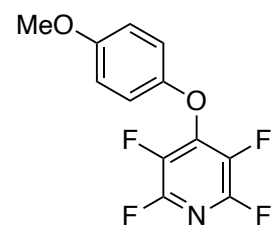

5

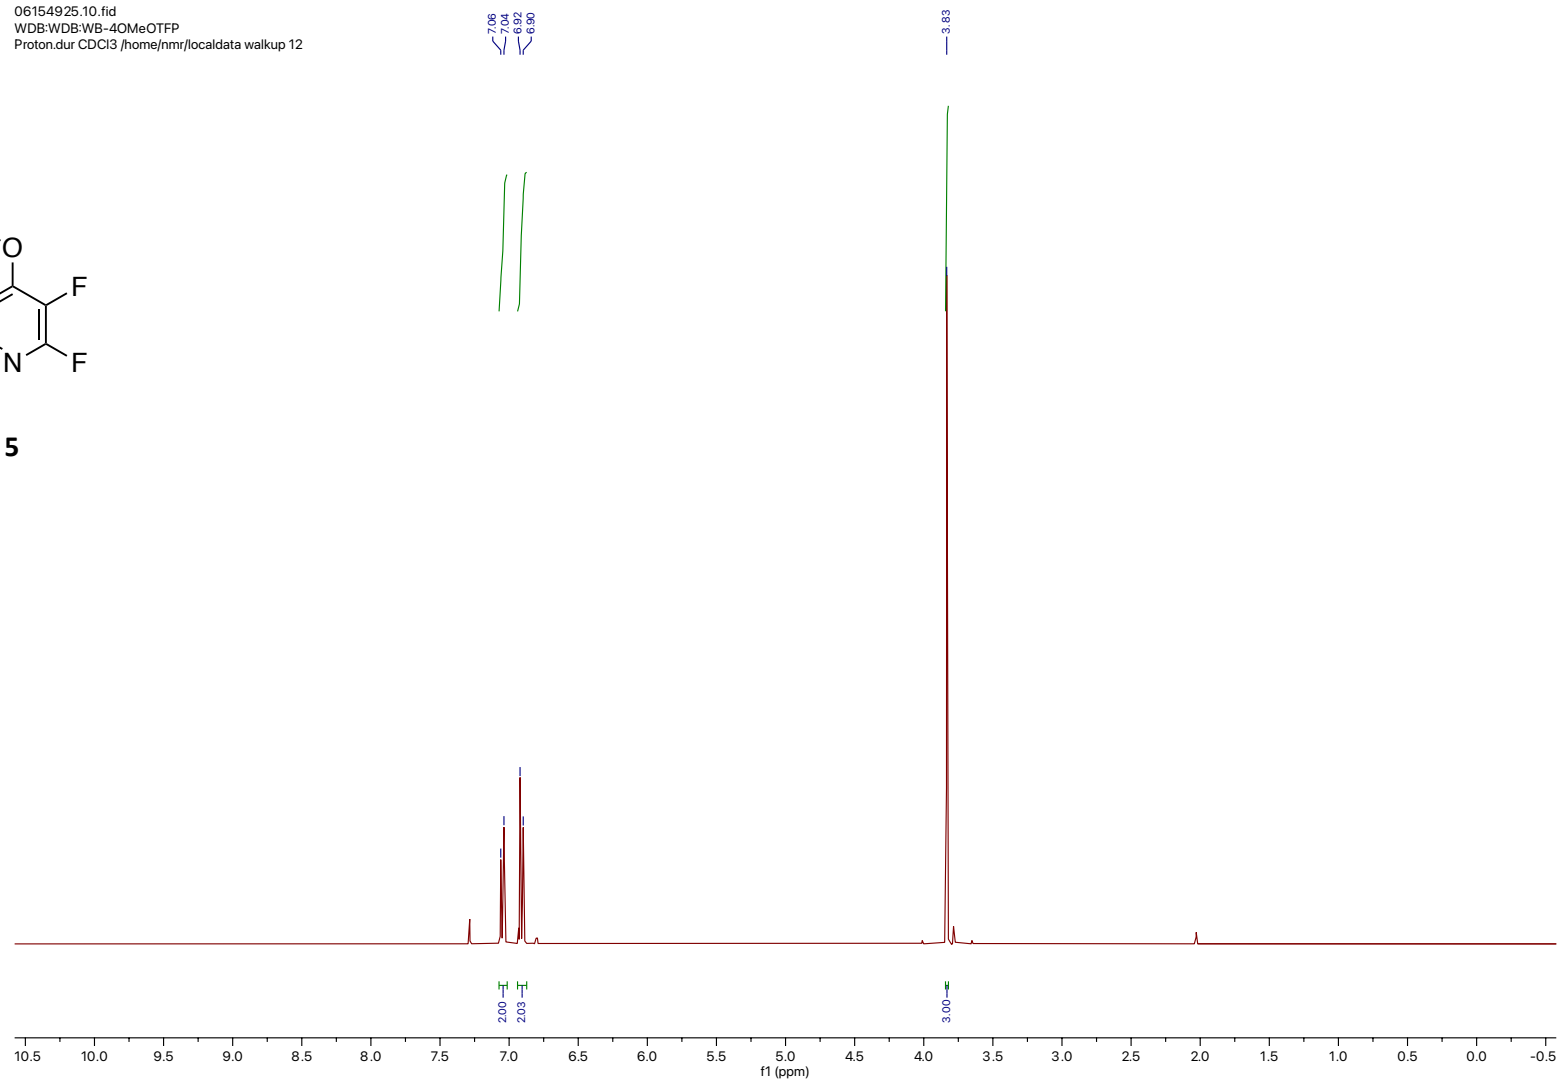

Figure S11.  $^1\text{H}$  NMR spectrum of **5** recorded at 400 MHz in  $\text{CDCl}_3$ .

06154925.13.fid  
WDB:WDB:WB-4OMeOTFP  
F19\_limits\_dec.dur CDCl3 /home/nmr/otc/data/Walkup 12

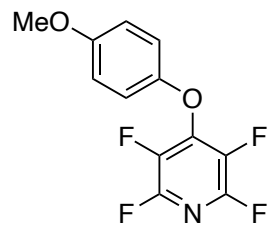

5

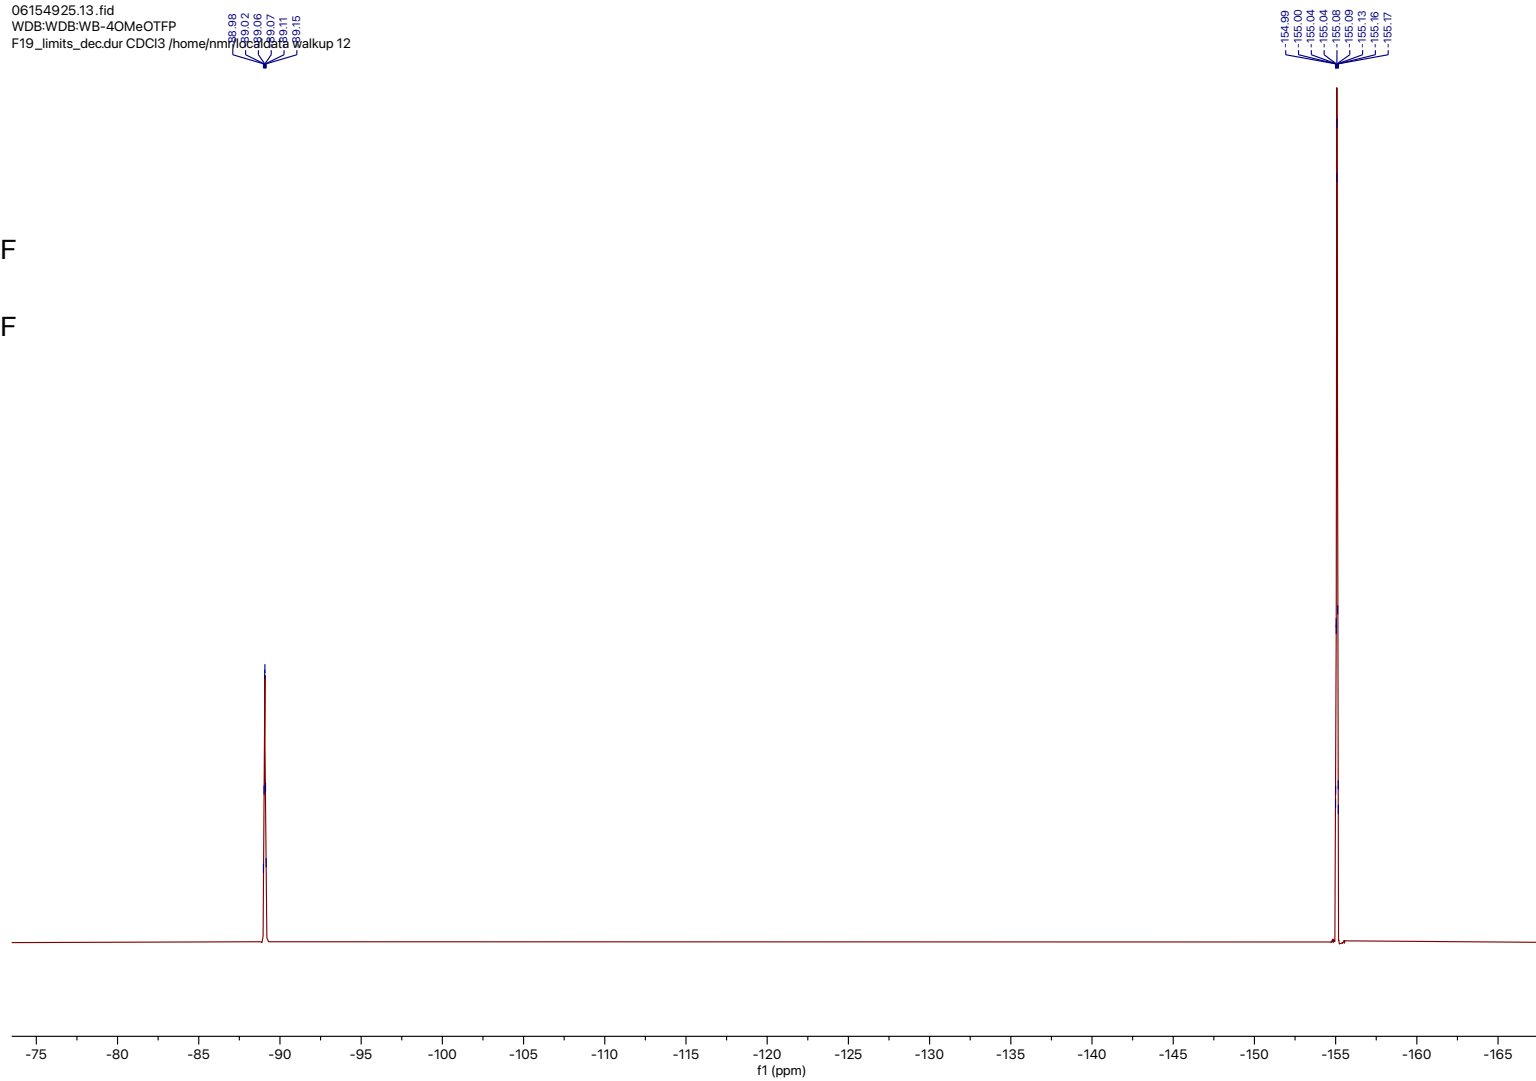

Figure S12.  $^{19}\text{F}\{^1\text{H}\}$  NMR spectrum of **5** recorded at 376 MHz in  $\text{CDCl}_3$ .

06154925.14.fid  
WDB:WDB:WB-4OMeOTFP  
Carbon.dur CDCl3 /home/nmr/localdata walkup 12

156.97  
149.70  
145.60  
145.57  
145.44  
145.41  
145.25  
145.20  
145.15  
145.10  
143.15  
143.04  
143.02  
142.99  
142.88  
142.85  
137.42  
137.33  
137.13  
134.81  
134.74  
134.61  
134.45  
118.23  
114.89

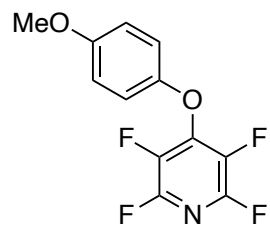

5

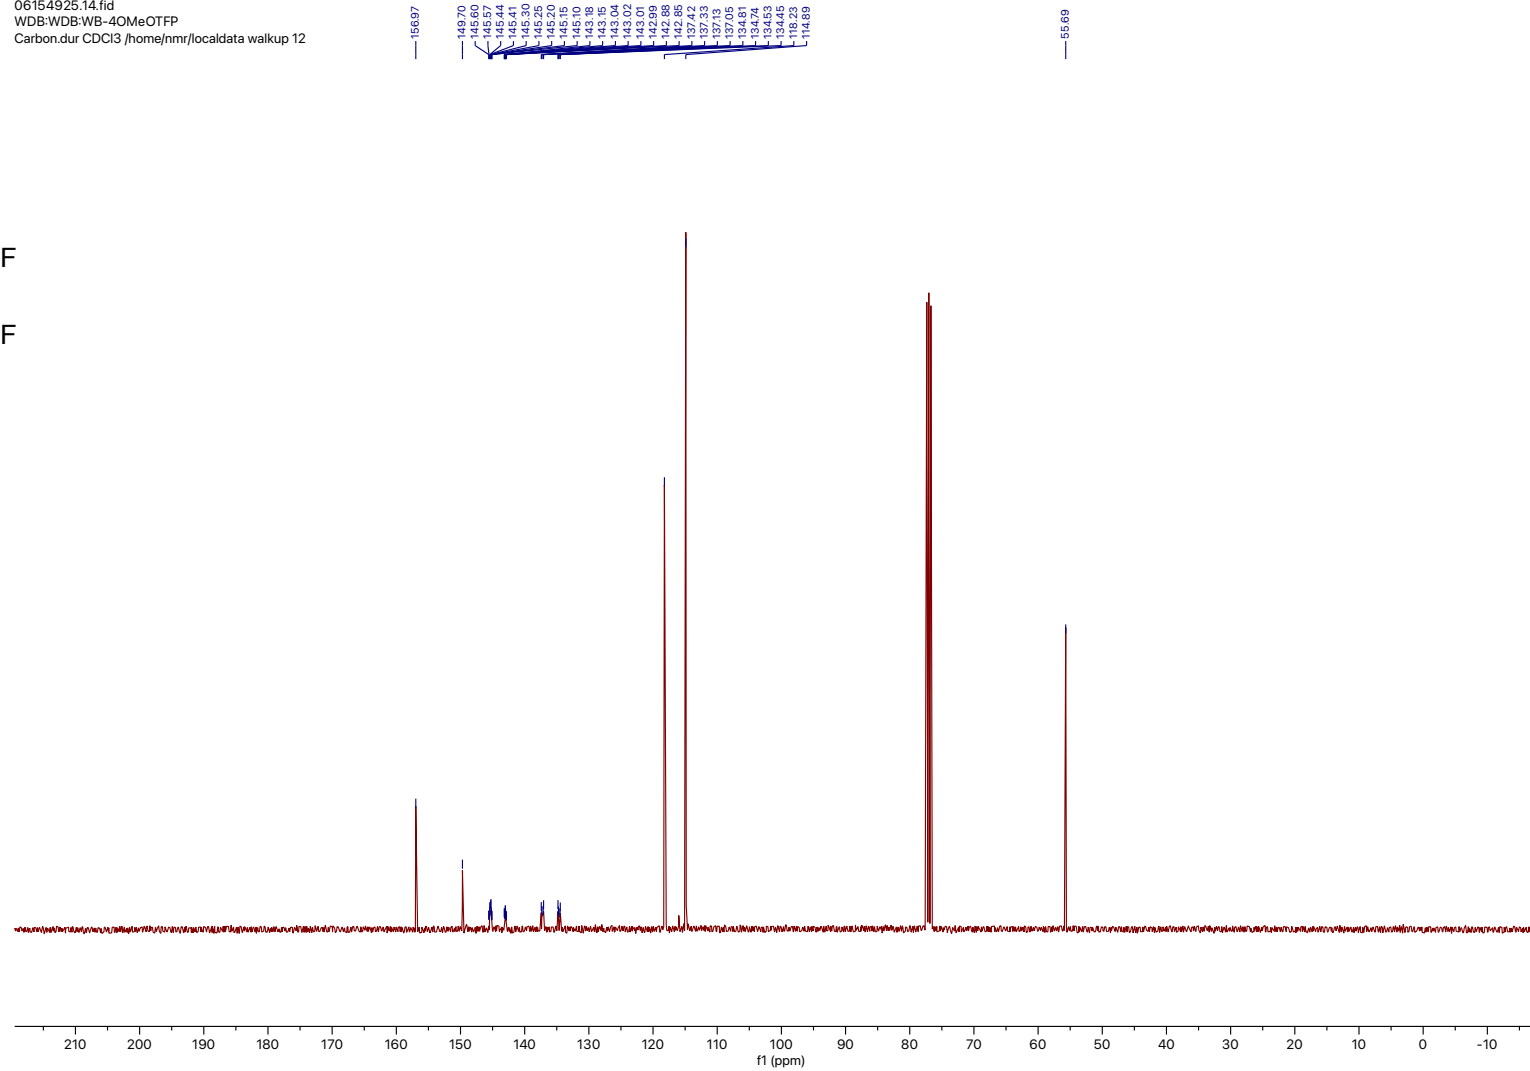

Figure S13.  $^{13}\text{C}\{^1\text{H}\}$  NMR spectrum of **5** recorded at 101 MHz in  $\text{CDCl}_3$ .

21120109.10.fid  
WDB:WDB:DEV:WB-WOLPEV  
Proton.dur CDCl3 /home/nmr/localdata/walkup/31

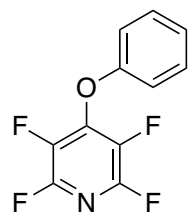

6

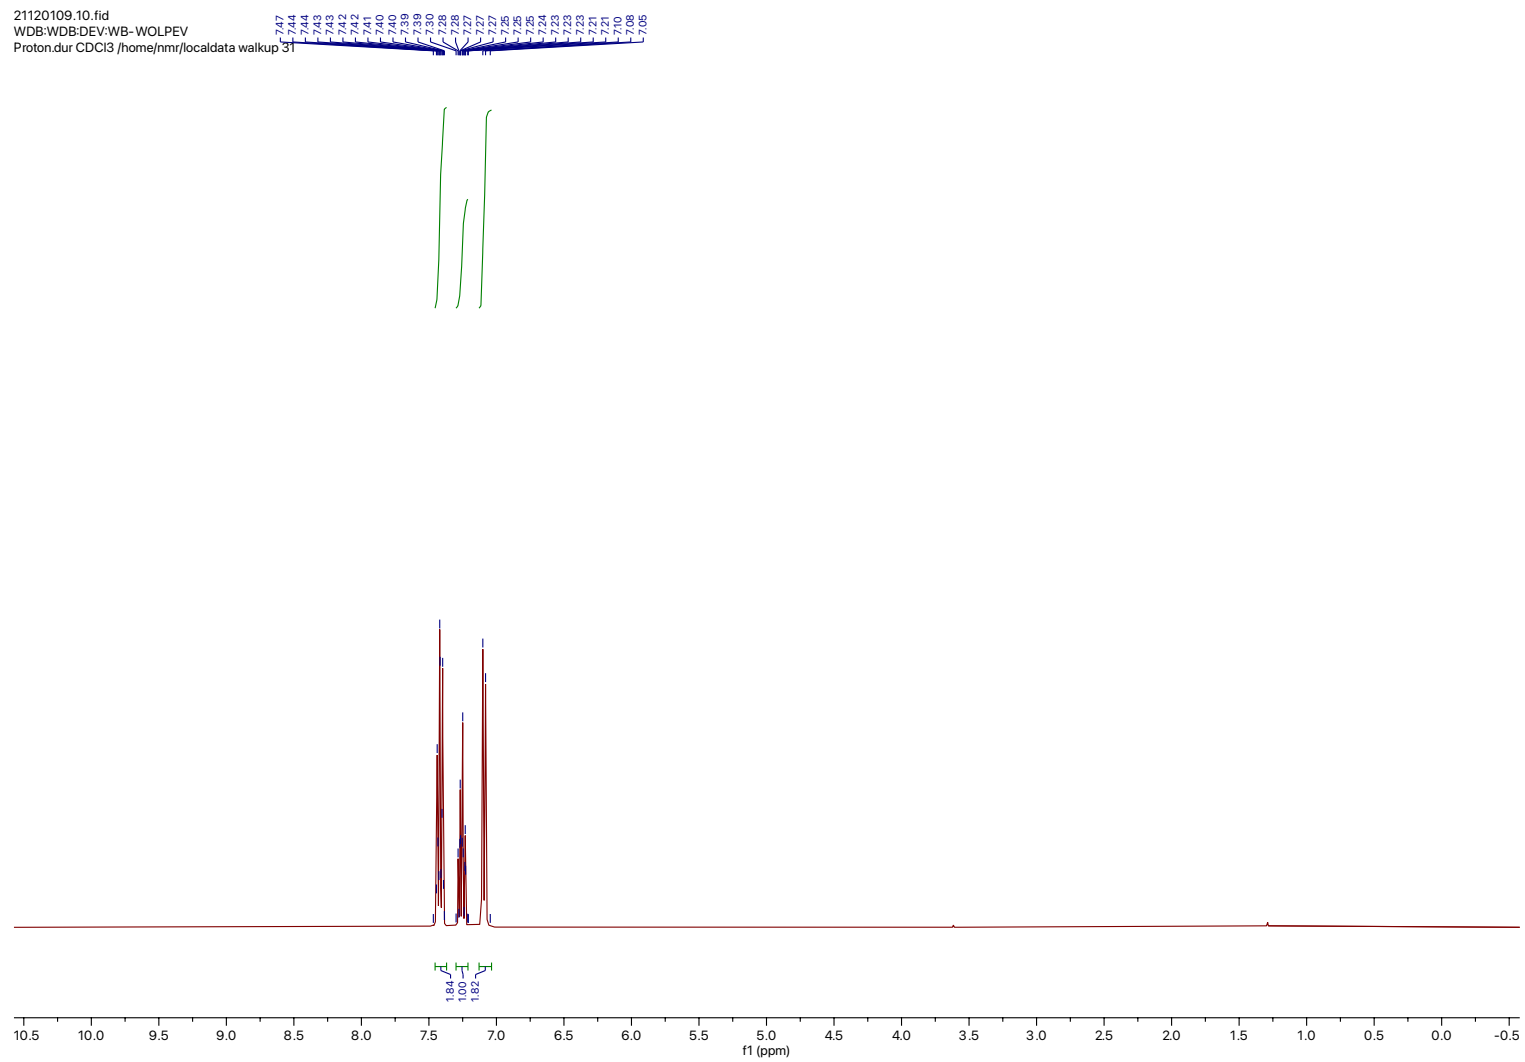

Figure S14.  $^1\text{H}$  NMR spectrum of **6** recorded at 400MHz in  $\text{CDCl}_3$ .

88.62  
88.66  
88.70  
88.74  
88.78  
88.82

154.25  
154.29  
154.33  
154.37  
154.41

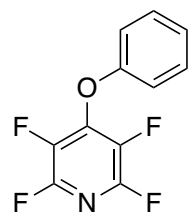

6

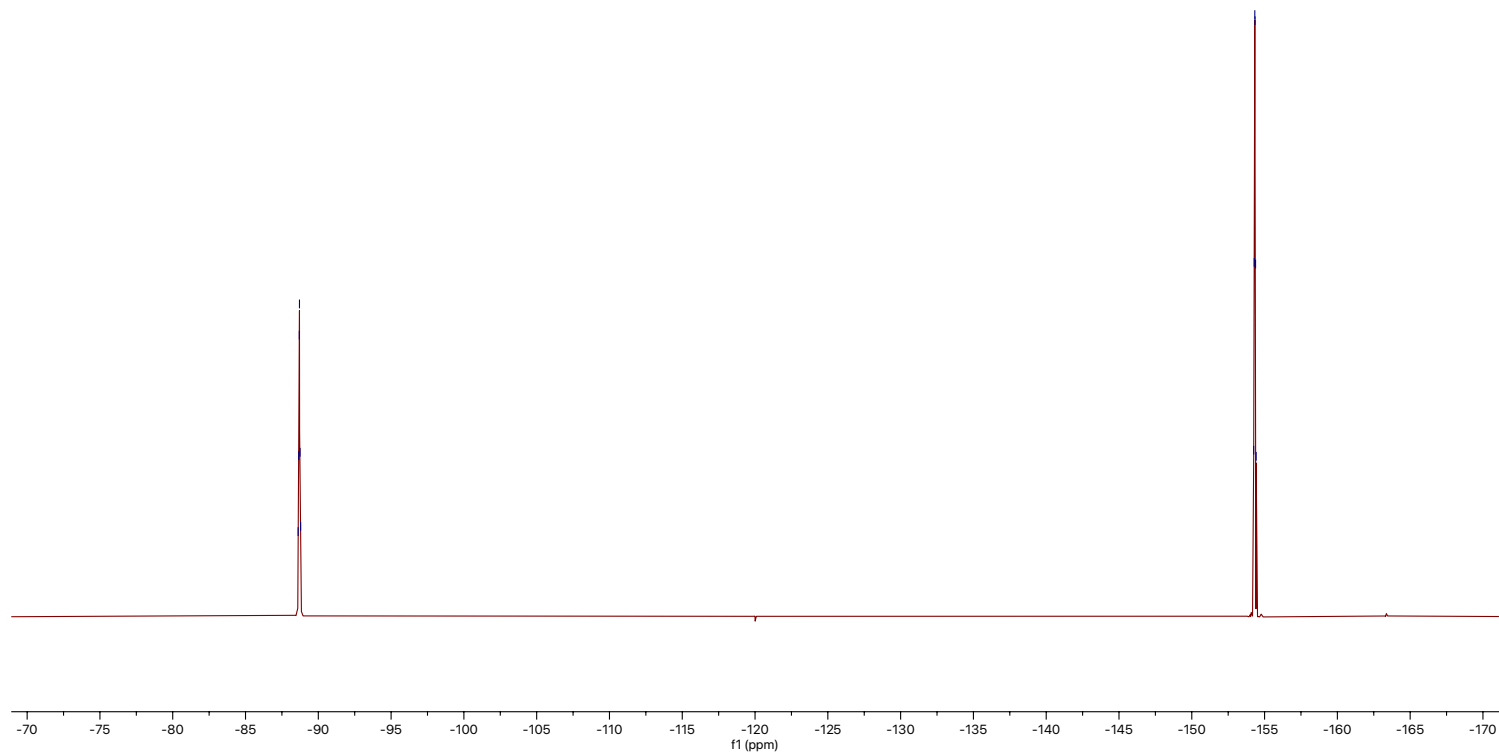

Figure S15.  $^{19}\text{F}\{^1\text{H}\}$  NMR spectrum of **5** recorded at 376 MHz in  $\text{CDCl}_3$ .

21120109.14.fid  
WDB:WDB:DEV:WB-WOLPEV  
Carbon.dur CDCl3 (/home/nmr/localdata/wolpev/21120109.14.fid)

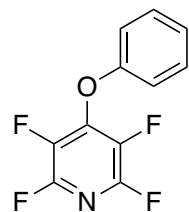

6

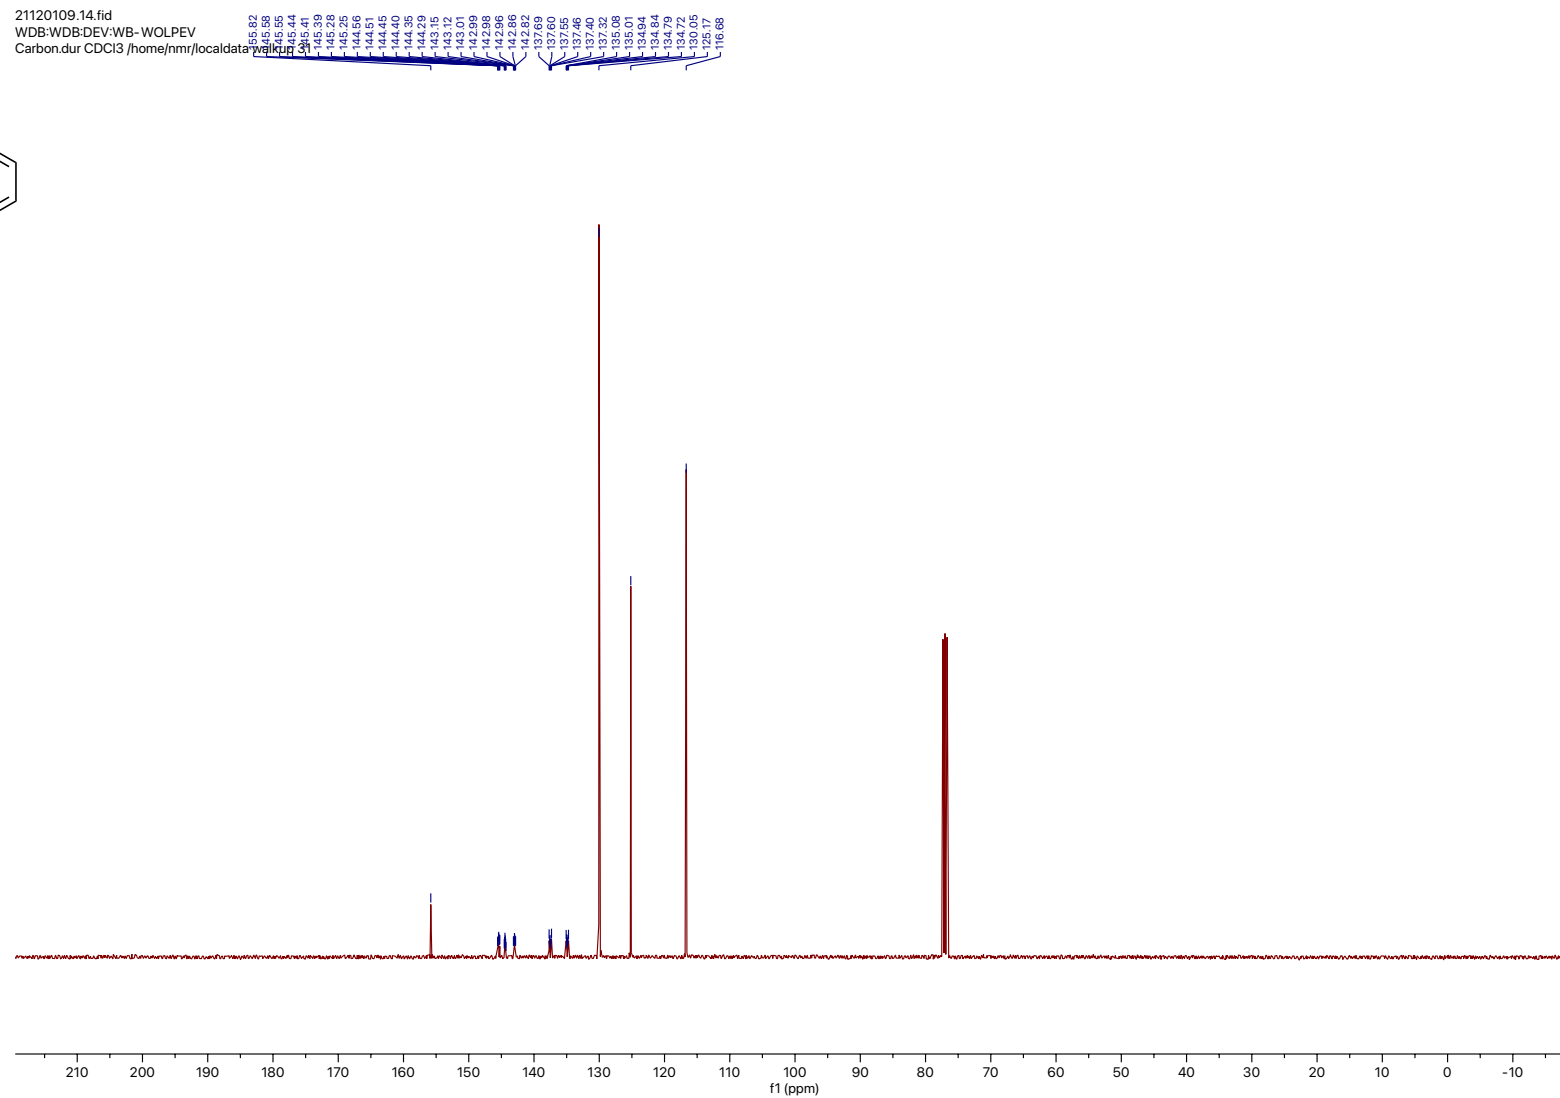

Figure S16.  $^{13}\text{C}\{^1\text{H}\}$  NMR spectrum of **6** recorded at 101 MHz in  $\text{CDCl}_3$ .

02180616.10.fid  
WDB:WDB:WB-TFP-6  
Proton.dur CDCl3 /home/nmr/localdata/walkup 56

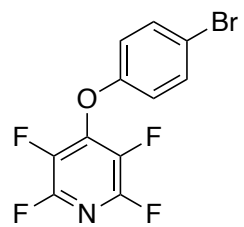

**7**

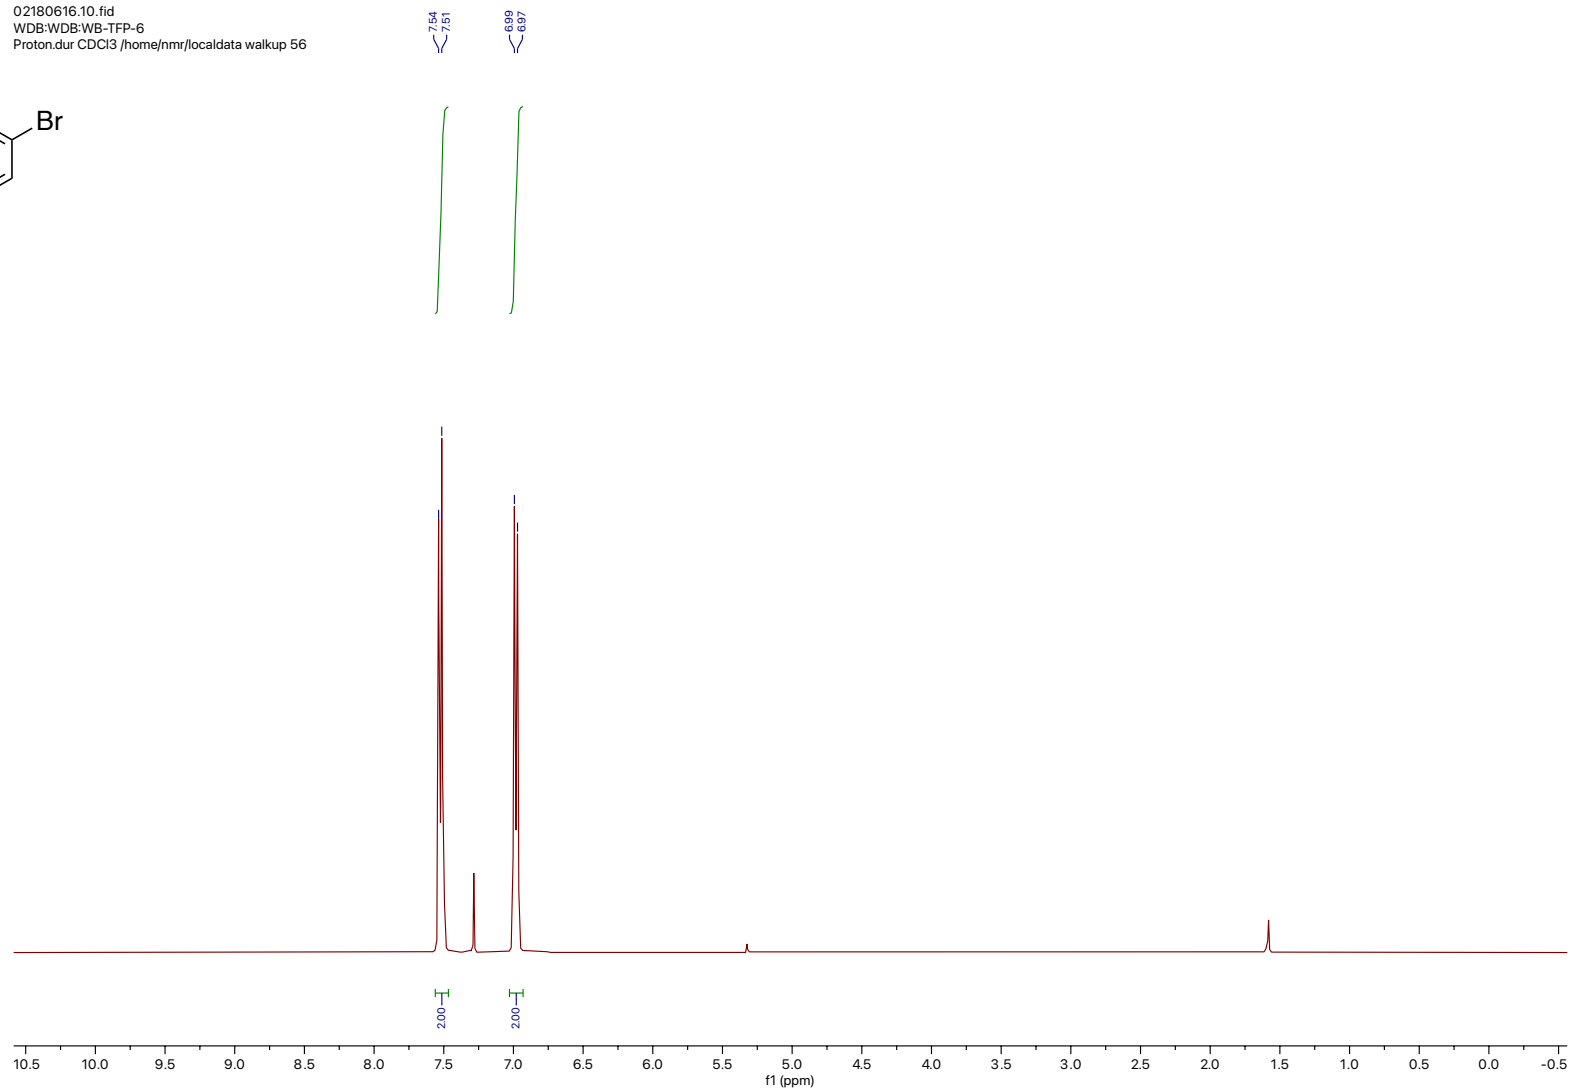

Figure S17. <sup>1</sup>H NMR spectrum of **7** recorded at 400 MHz in CDCl<sub>3</sub>.

02180616.12.fid  
WDB:WDB:WB-TFP-6  
F19\_limits.dur CDCl3 /home/nmr/localdata/walkup

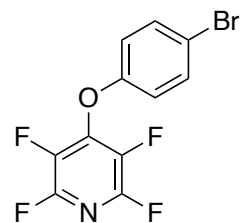

**7**

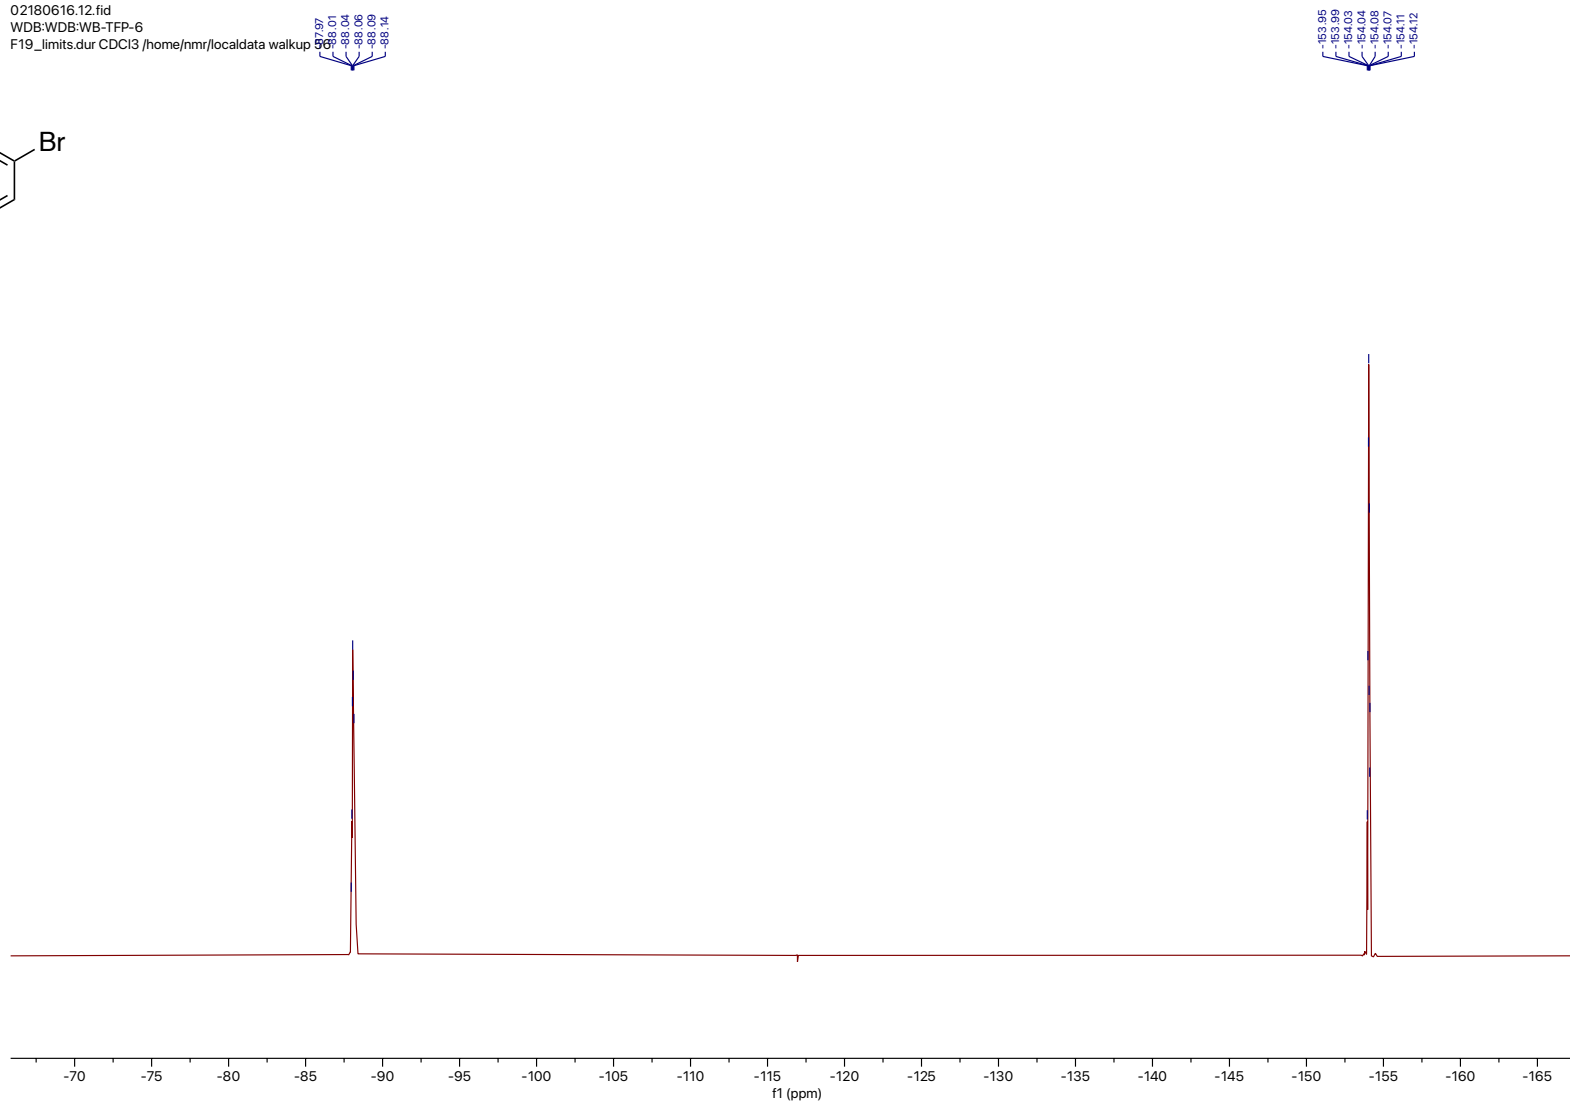

**Figure S18.**  $^{19}\text{F}\{^1\text{H}\}$  NMR spectrum of **7** recorded at 376 MHz in  $\text{CDCl}_3$ .

02180616.14.fid  
WDB:WDB:WB-TFP-6  
Carbon.dur CDCl3 /home/nmr/localdata walkup 56

154.81  
146.56  
146.53  
146.39  
146.37  
145.23  
144.06  
144.01  
143.96  
143.95  
143.85  
143.13  
143.09  
142.96  
142.63  
137.53  
137.47  
137.43  
137.33  
137.27  
134.95  
134.87  
134.80  
134.71  
134.65  
133.58  
133.05  
118.46  
117.98

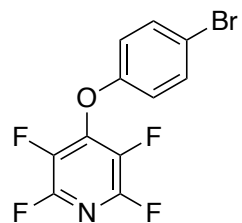

**7**

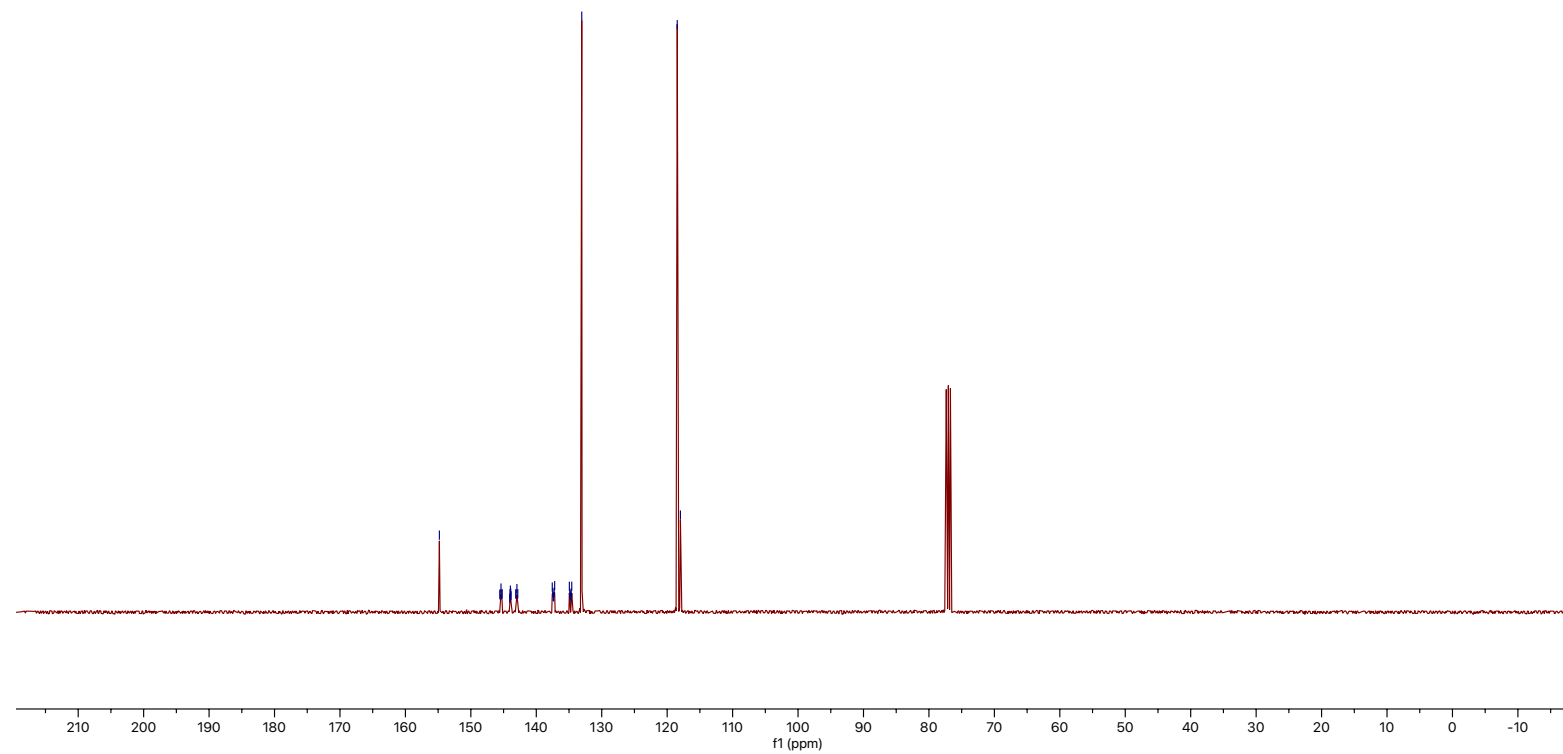

**Figure S19.**  $^{13}\text{C}\{^1\text{H}\}$  NMR spectrum of **7** recorded at 101 MHz in  $\text{CDCl}_3$ .

02180556.10.fid  
WDB:WDB:WB-TFP-5  
Proton.dur CDCl3 /home/nmr/localdata/walkup/55

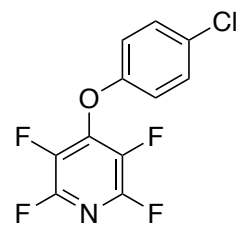

**8**

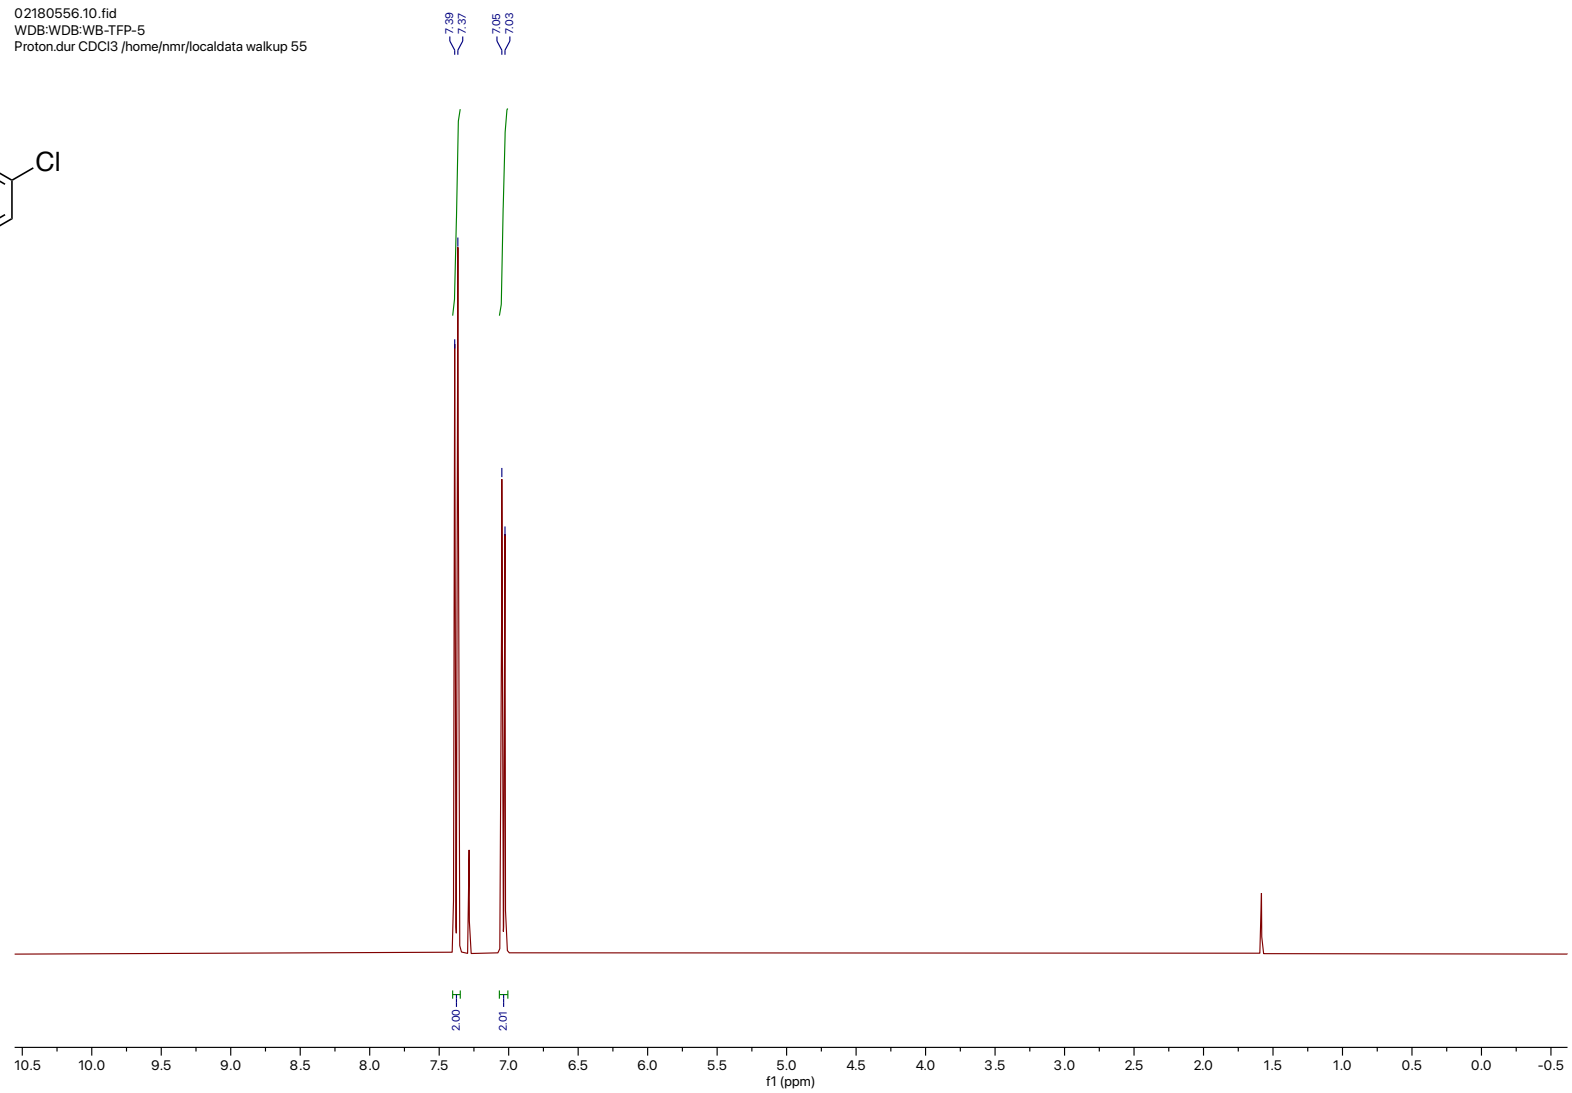

Figure S20.  $^1\text{H}$  NMR spectrum of **8** recorded at 400 MHz in  $\text{CDCl}_3$ .

02180556.13.fid  
WDB:WDB:WB-TFP-5  
F19\_limits\_dec.dur CDCl3 /home/nmr/localdata/wall

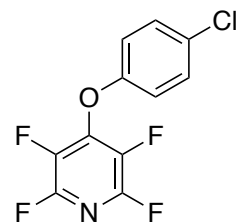

**8**

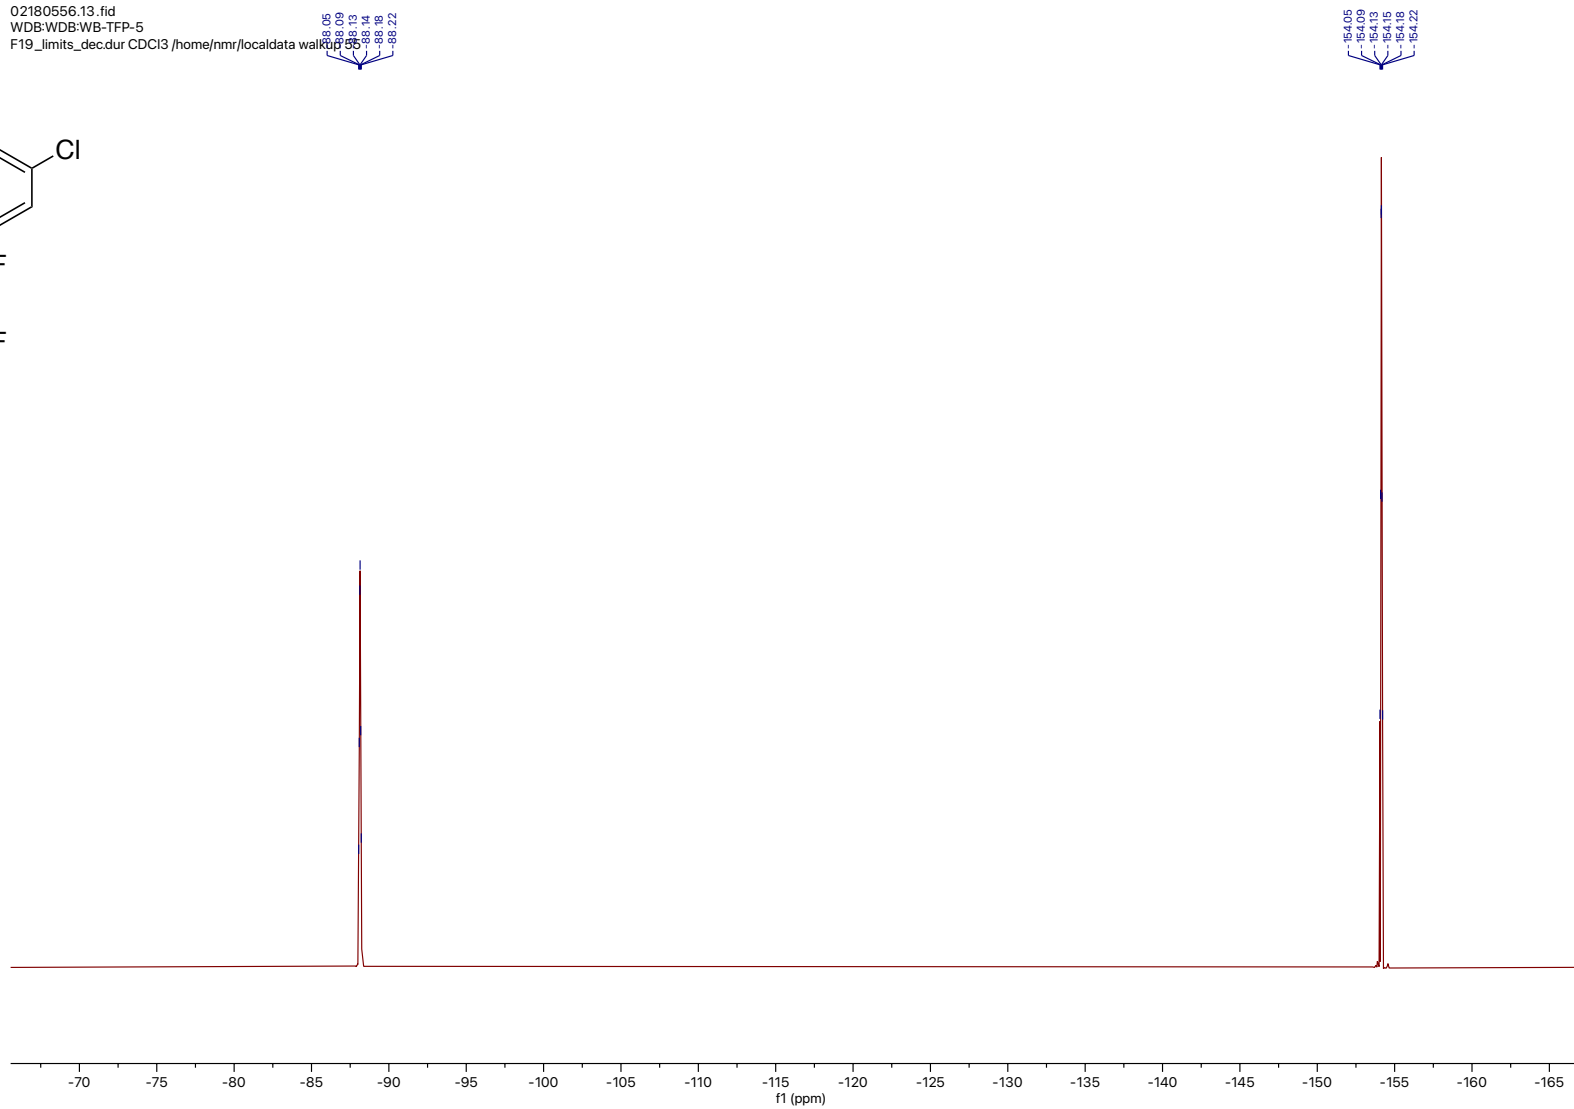

**Figure S21.**  $^{19}\text{F}\{^1\text{H}\}$  NMR spectrum of **8** recorded at 376 MHz in  $\text{CDCl}_3$ .

02180556.14.fid  
WDB:WDB:WB-TFP-5  
Carbon.dur CDCl3 /home/nmr/localdata/walkup 55

154.25  
146.57  
146.54  
145.40  
145.27  
144.74  
144.16  
144.12  
144.02  
143.97  
143.93  
142.97  
142.84  
142.80  
137.46  
137.42  
137.32  
137.26  
137.16  
134.93  
134.86  
134.79  
134.70  
134.65  
134.57  
130.54  
118.09

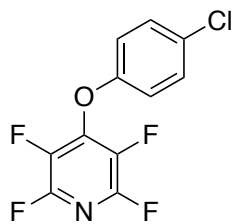

**8**

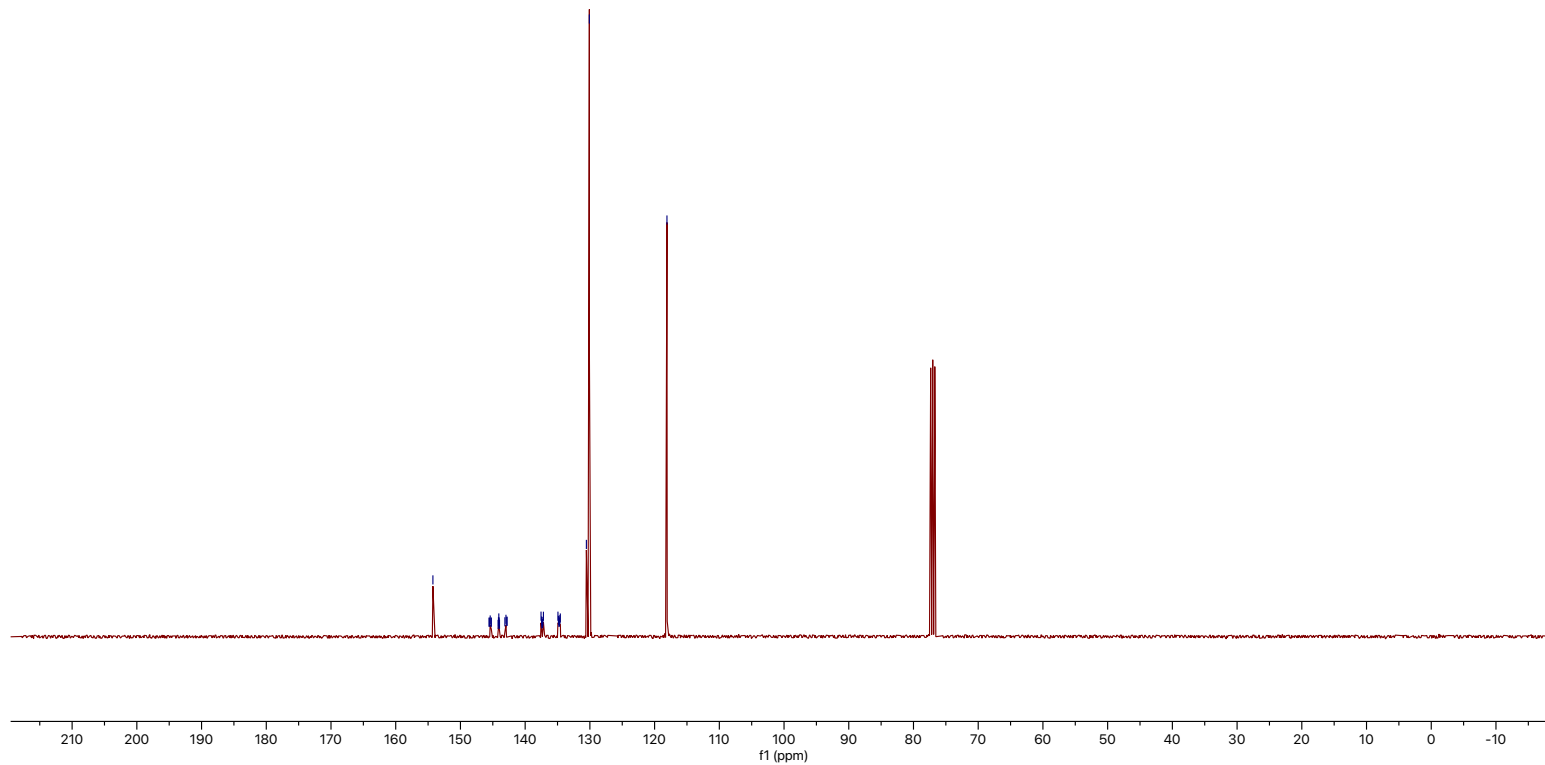

Figure S22.  $^{13}\text{C}\{^1\text{H}\}$  NMR spectrum of **8** recorded at 101 MHz in  $\text{CDCl}_3$ .

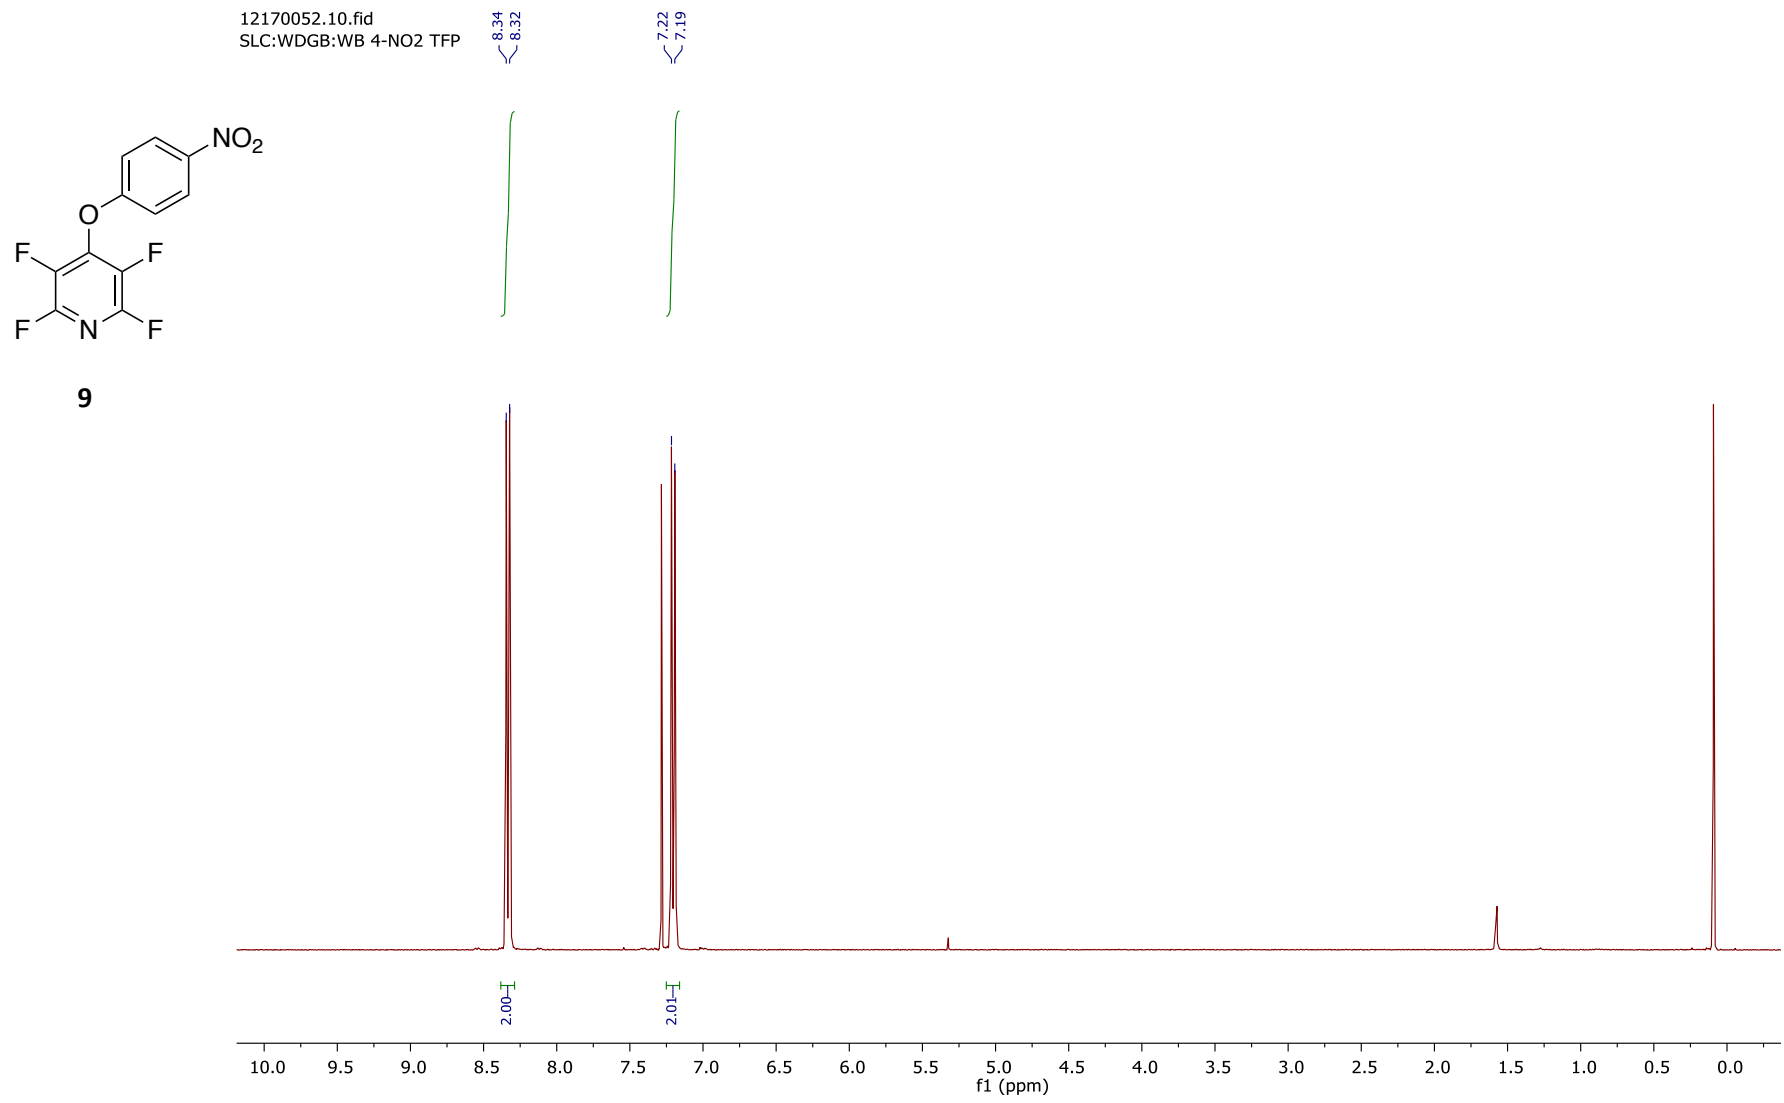

Figure S23.  $^1\text{H}$  NMR spectrum of **9** recorded at 400 MHz in  $\text{CDCl}_3$ .

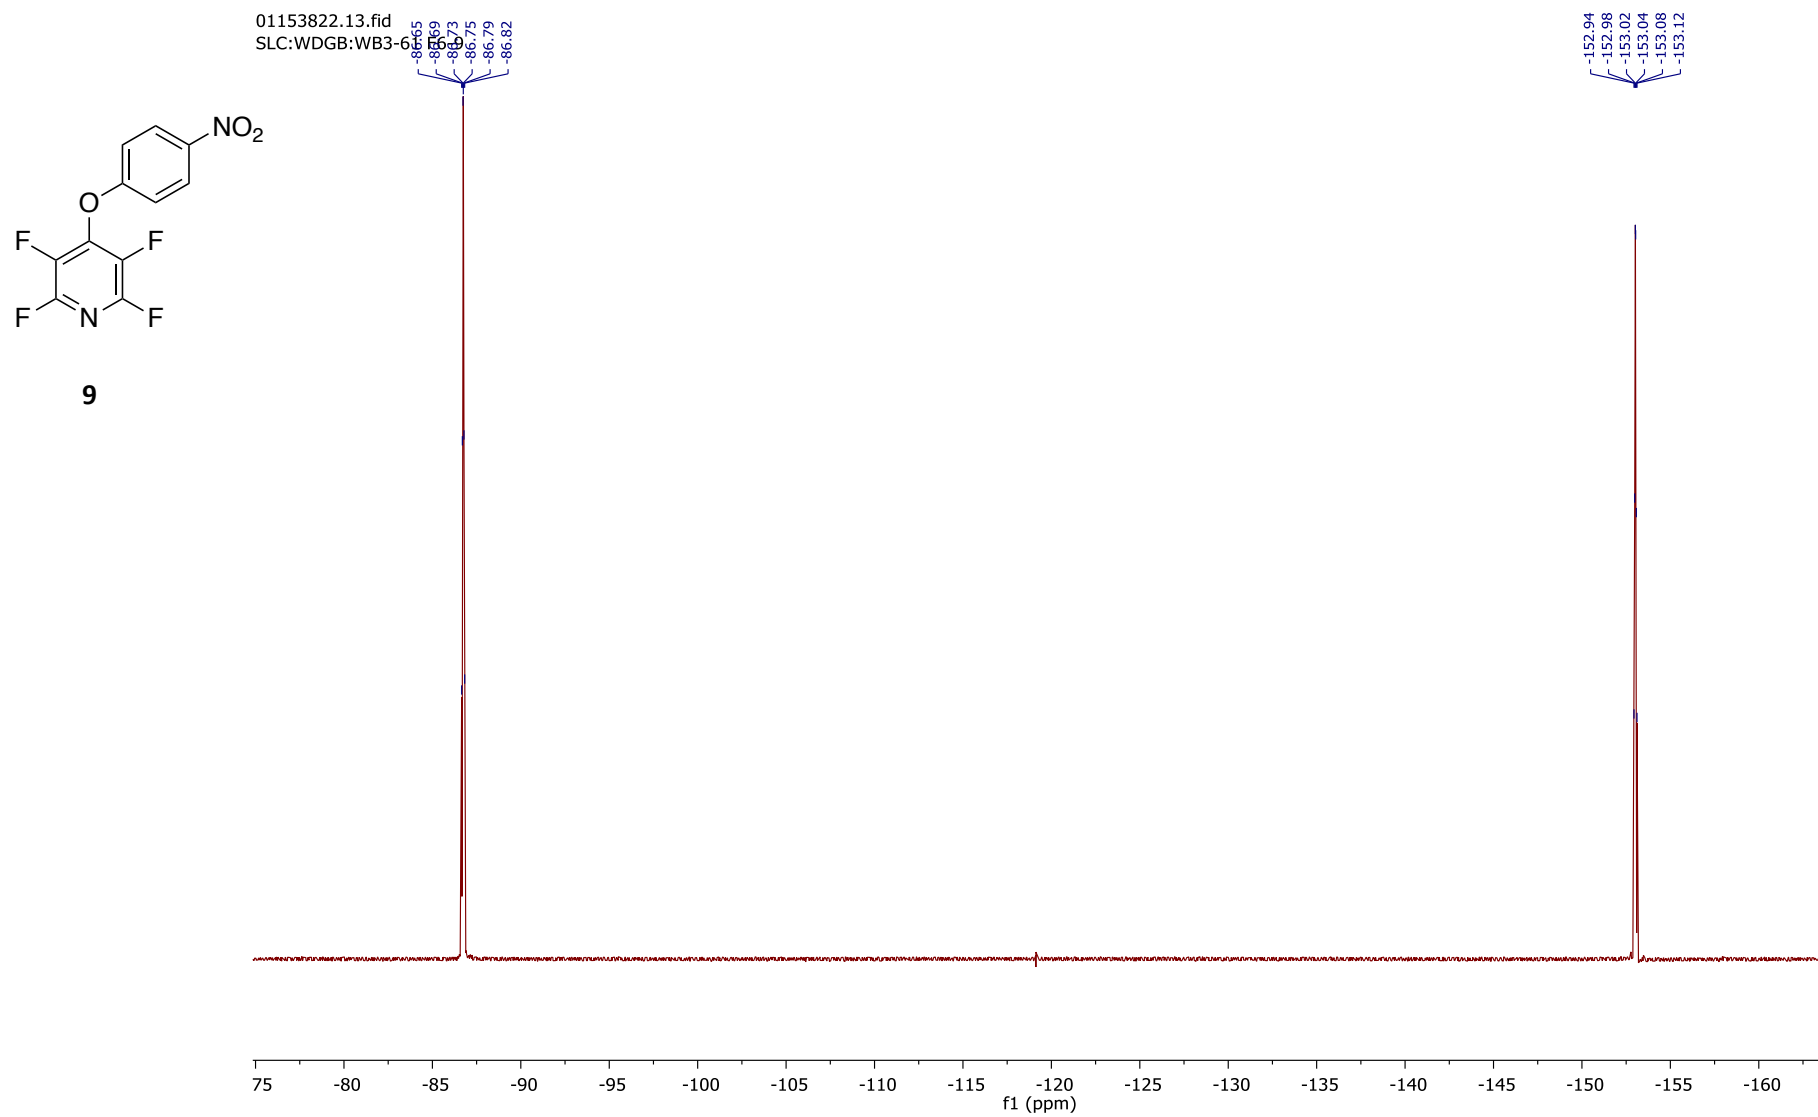

Figure S24.  $^{19}\text{F}\{^1\text{H}\}$  NMR spectrum of **9** recorded at 376 MHz in  $\text{CDCl}_3$ .

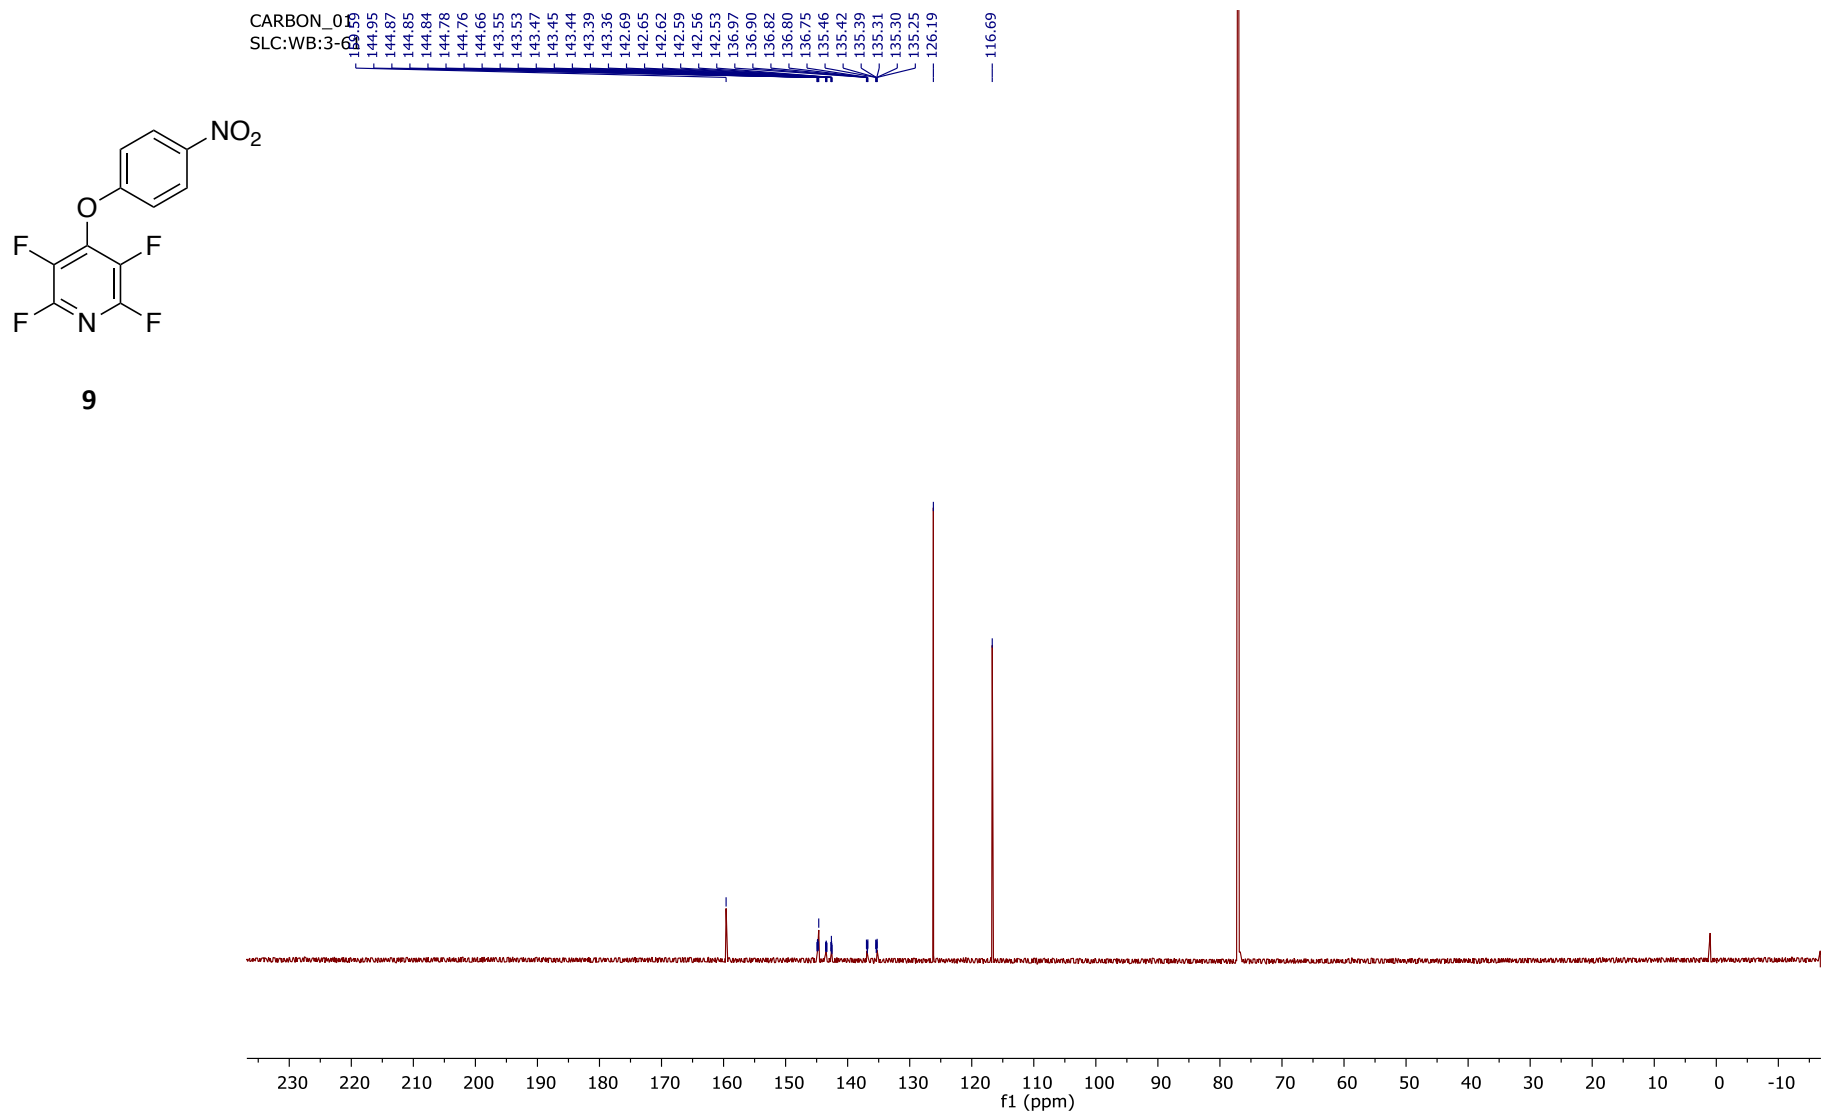

Figure S25.  $^{13}\text{C}\{^1\text{H}\}$  NMR spectrum of **9** recorded at 101 MHz in  $\text{CDCl}_3$ .

06155009.10.fid  
WDB:WDB:WB-4OMeSTFP  
Proton.dur CDCl3 /home/nmr/localdata/walkup/13

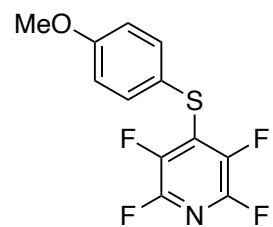

**10**

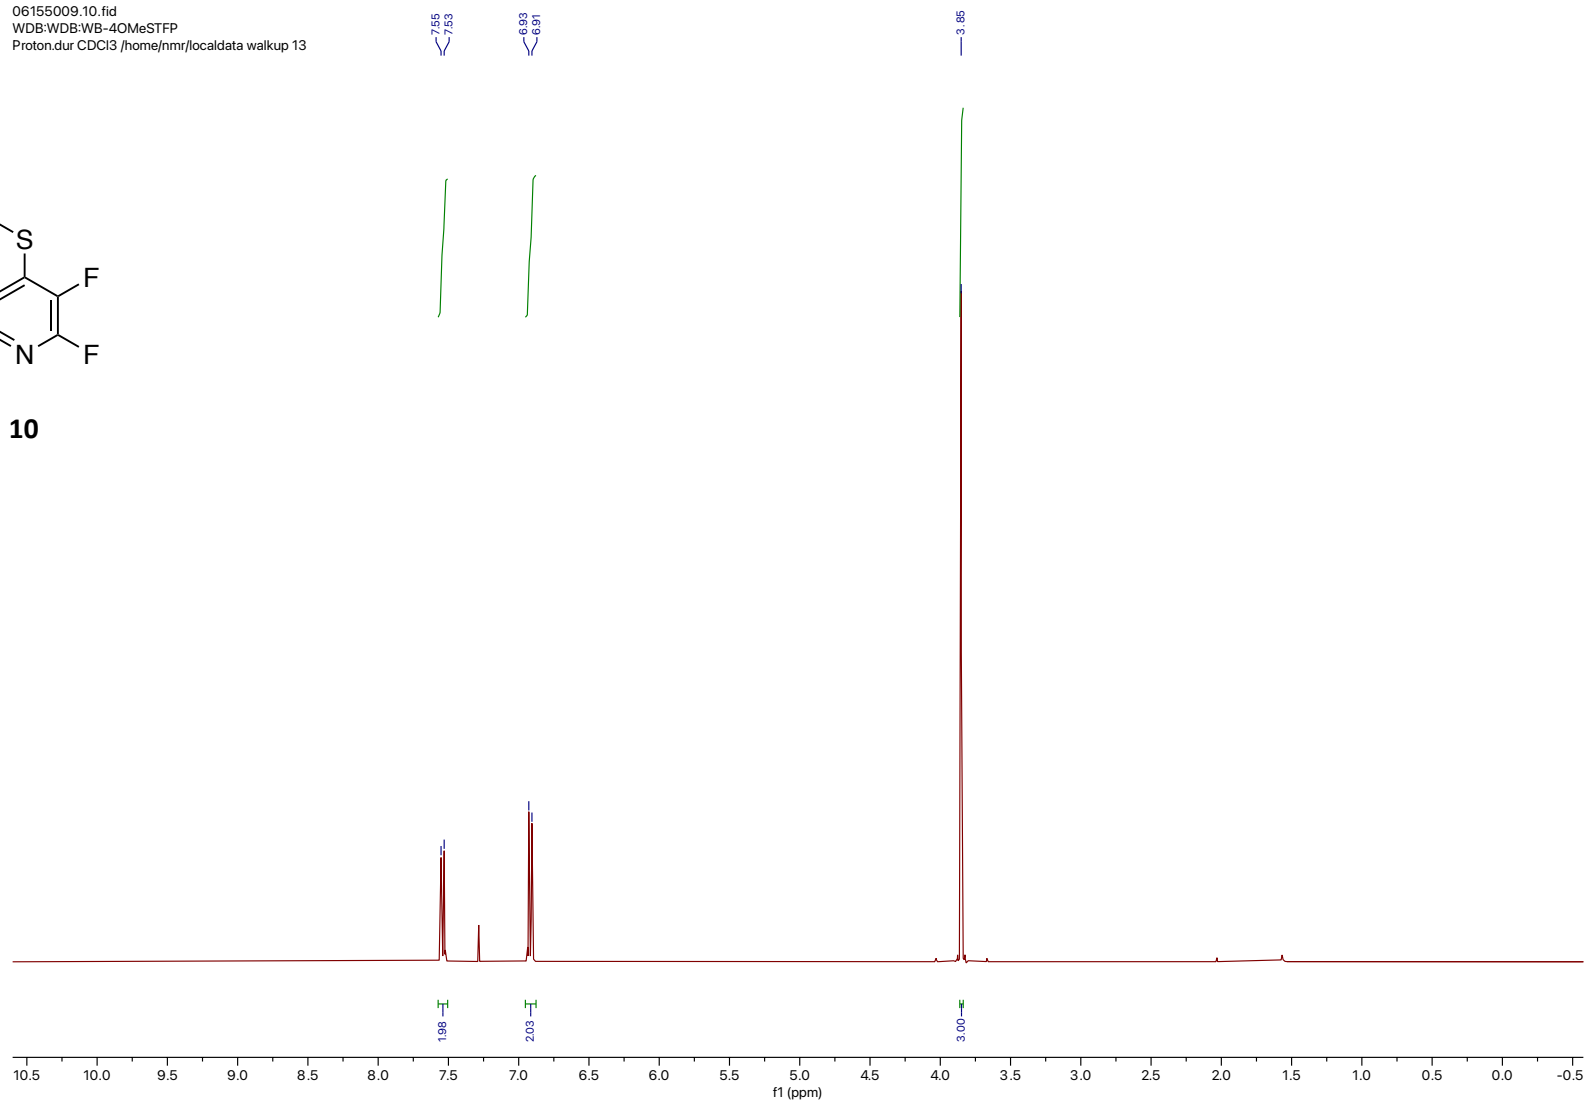

Figure S26.  $^1\text{H}$  NMR spectrum of **10** recorded at 400 MHz in  $\text{CDCl}_3$ .

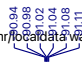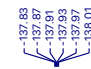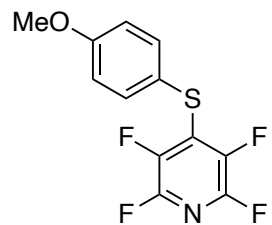

**10**

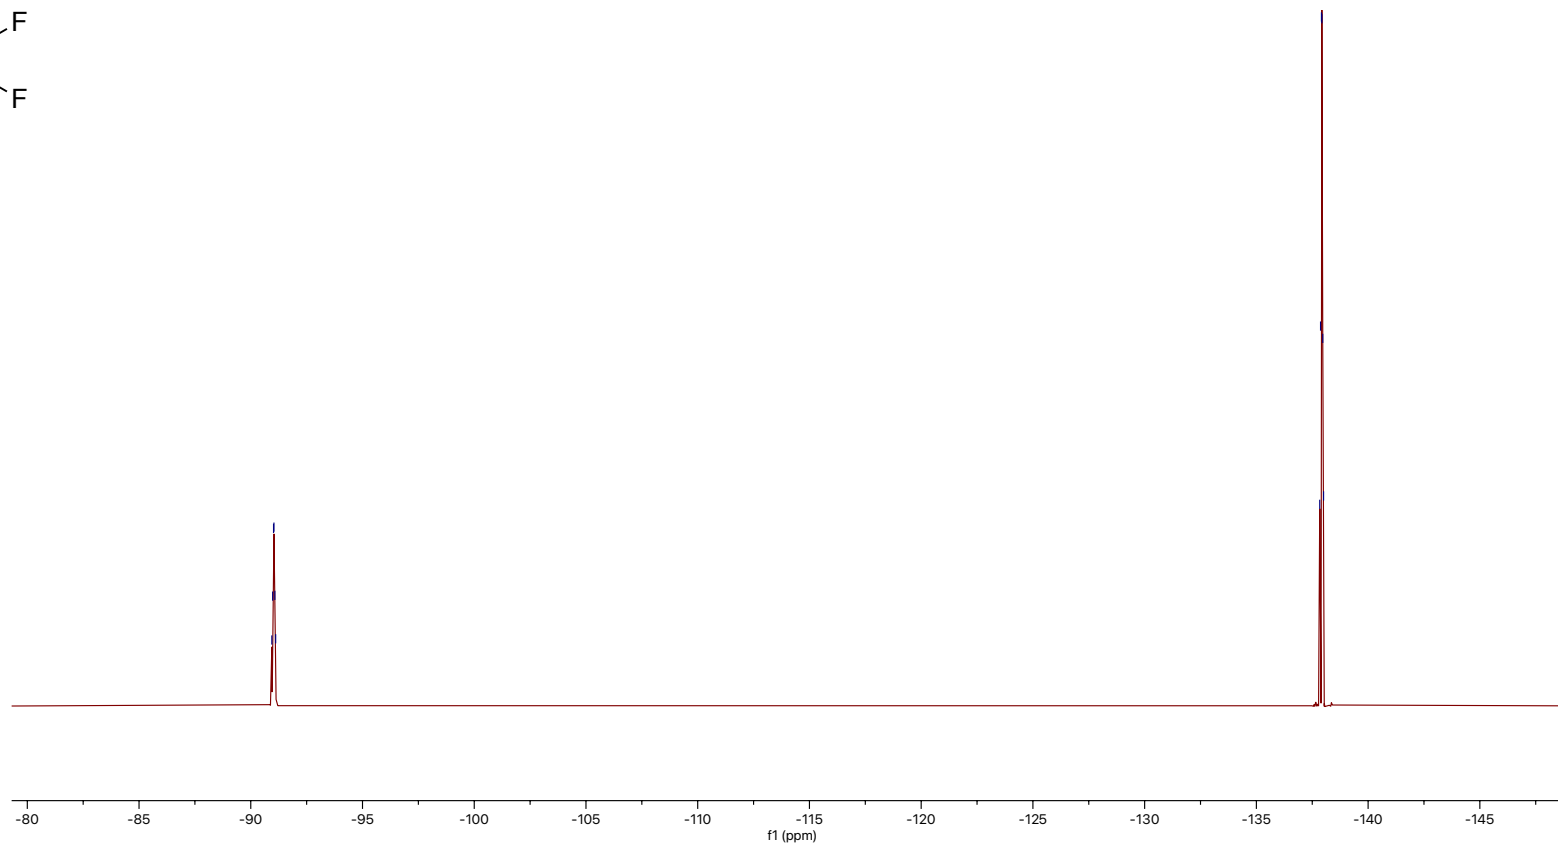

**Figure S27.**  $^{19}\text{F}\{^1\text{H}\}$  NMR spectrum of **10** recorded at 376MHz in  $\text{CDCl}_3$ .

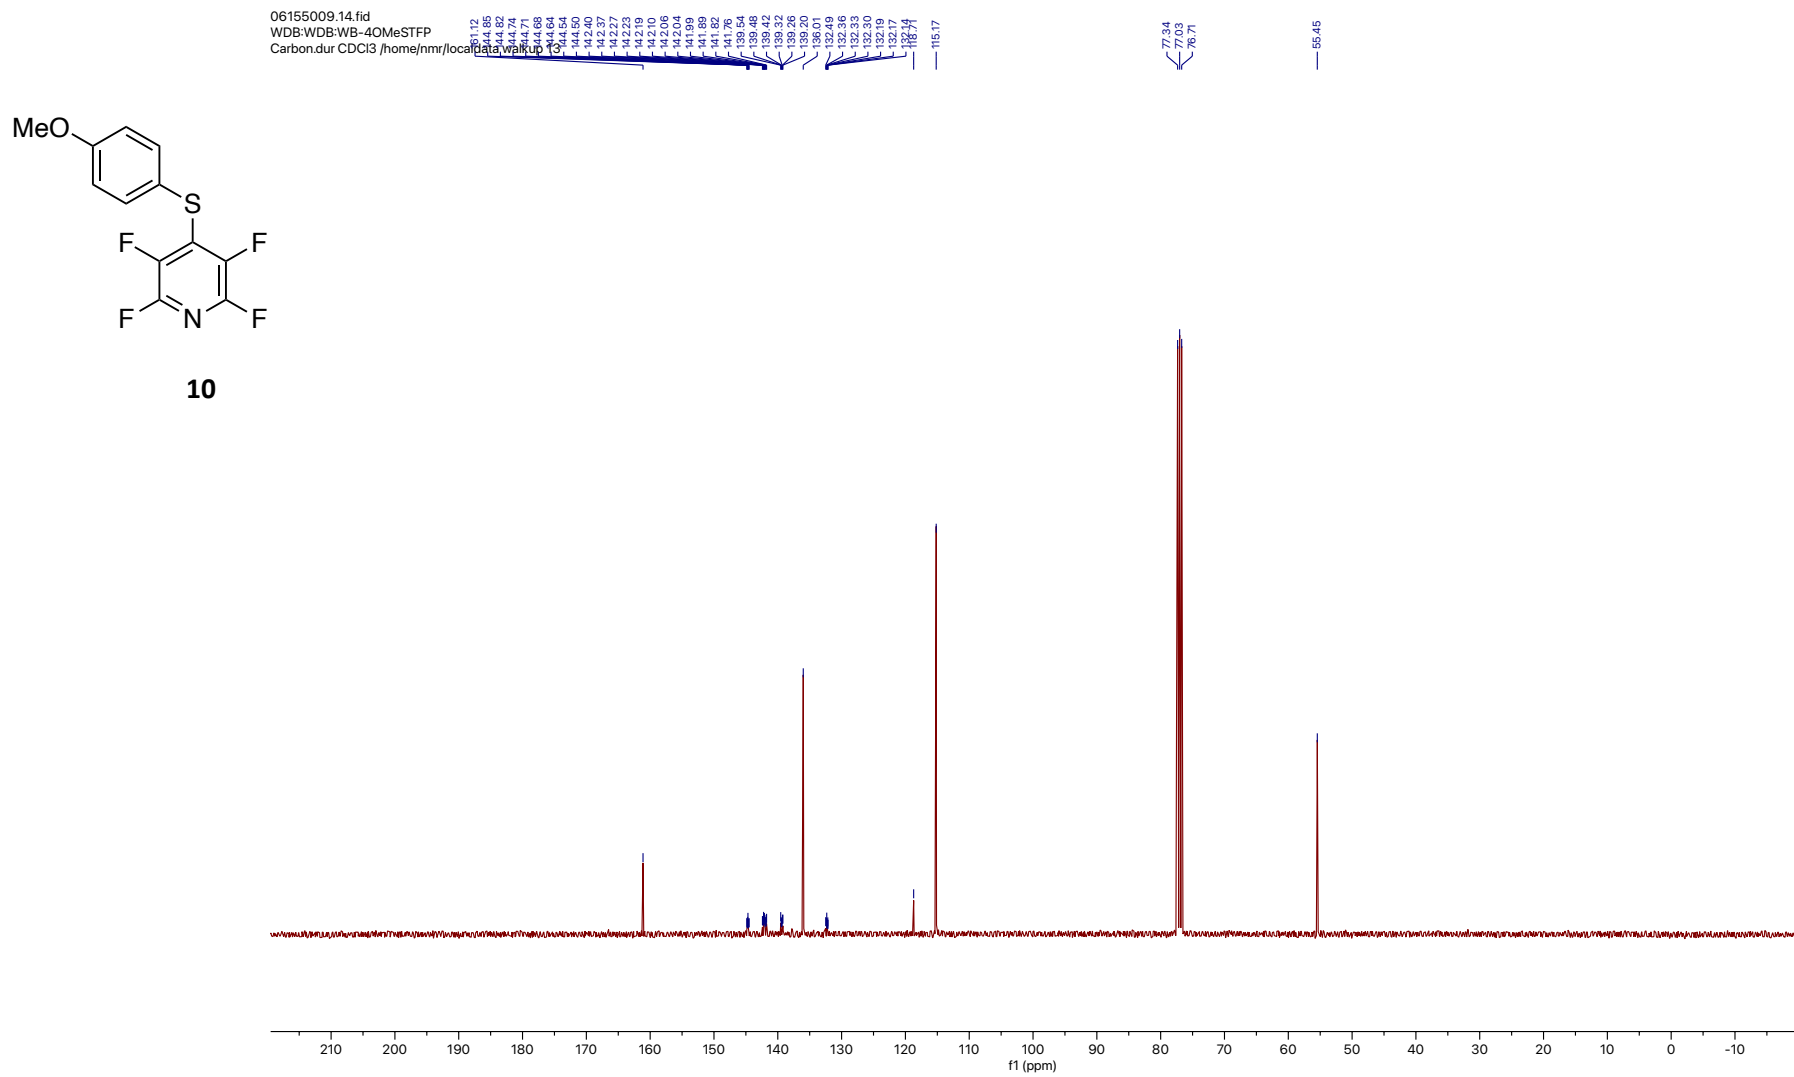

Figure S28.  $^{13}\text{C}\{^1\text{H}\}$  NMR spectrum of **10** recorded at 101 MHz in  $\text{CDCl}_3$ .

19133845.10.fid  
WDB:WDB:WB10-117  
Proton.dur CDCl3 /home/nmr/localdata/walkup/22

7.56  
7.56  
7.54  
7.44  
7.43  
7.43  
7.41  
7.41  
7.41  
7.40  
7.40  
7.39  
7.39  
7.38  
7.38  
7.37

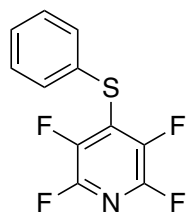

**11**

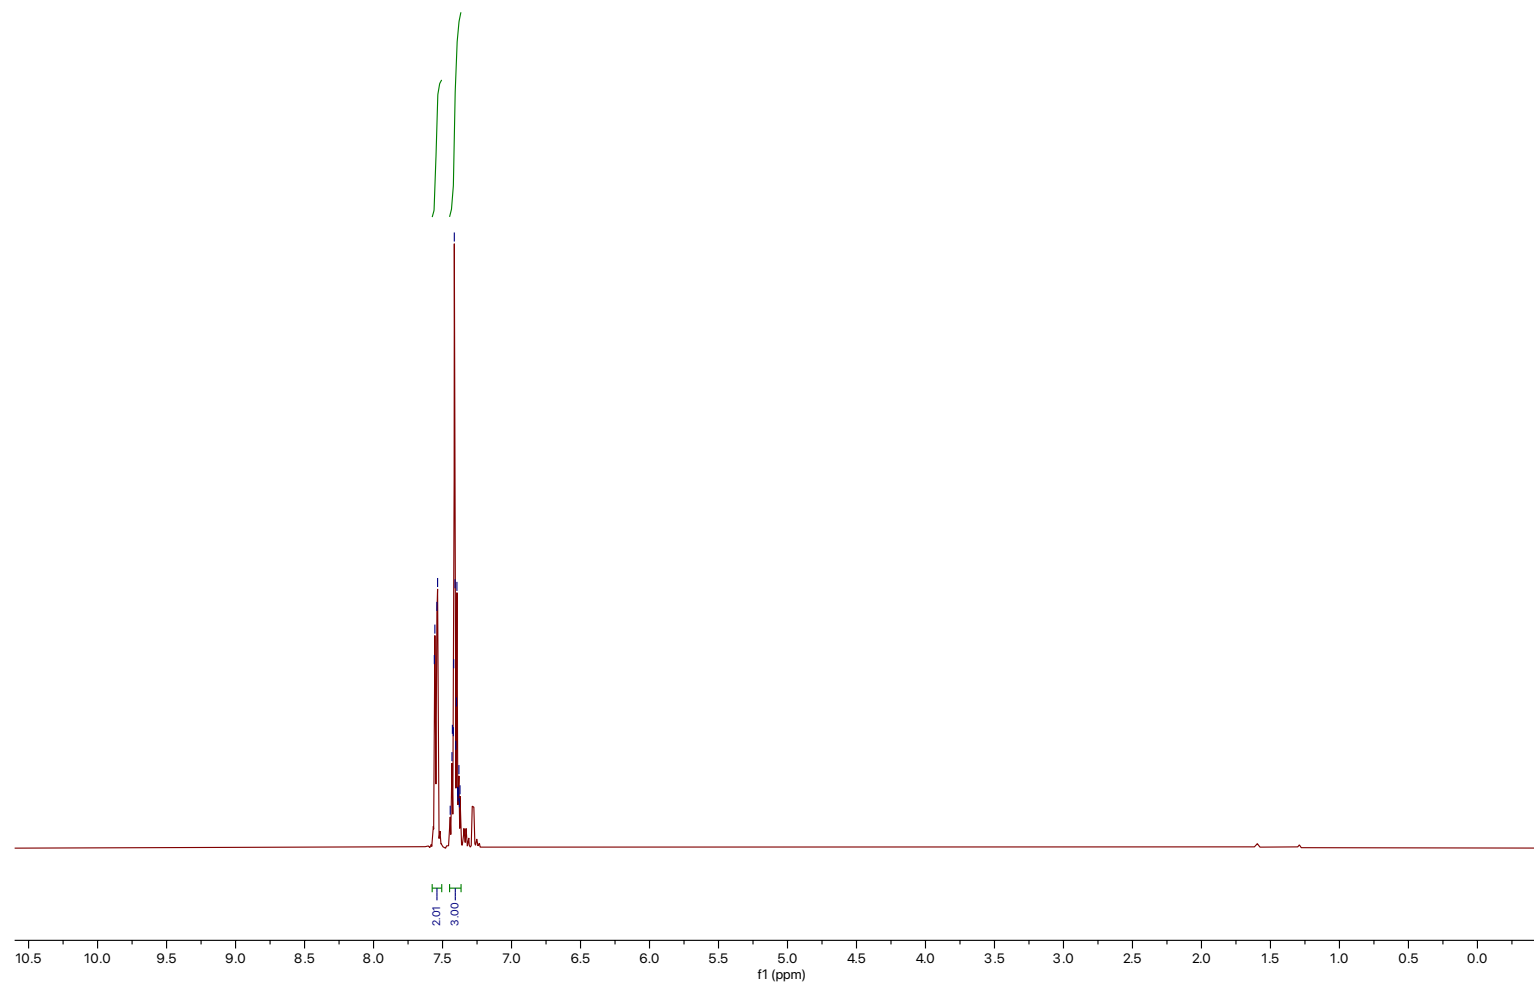

**Figure S29.** <sup>1</sup>H NMR spectrum of **11** recorded at 400 MHz in CDCl<sub>3</sub>.

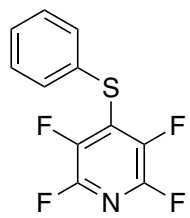

**11**

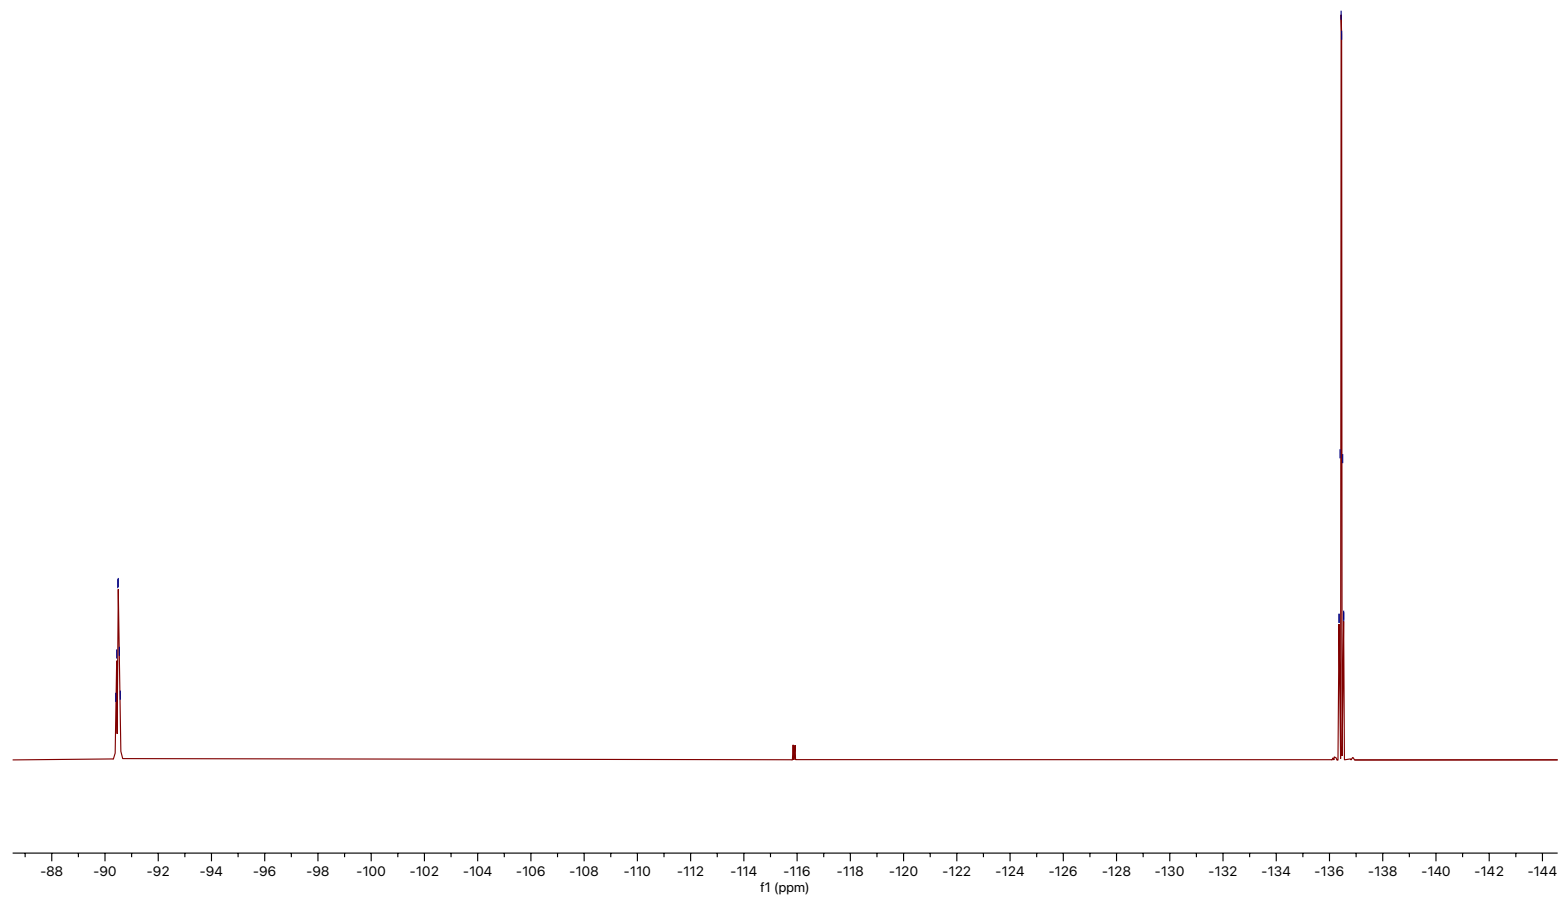

**Figure S30.**  $^{19}\text{F}\{^1\text{H}\}$  NMR spectrum of **11** recorded at 376 MHz in  $\text{CDCl}_3$ .

20173836.11.fid  
WDB:WDB:WB10-117  
Carbon.dur CDCl3 /home/nmr/localdata/walkup/88

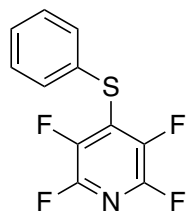

**11**

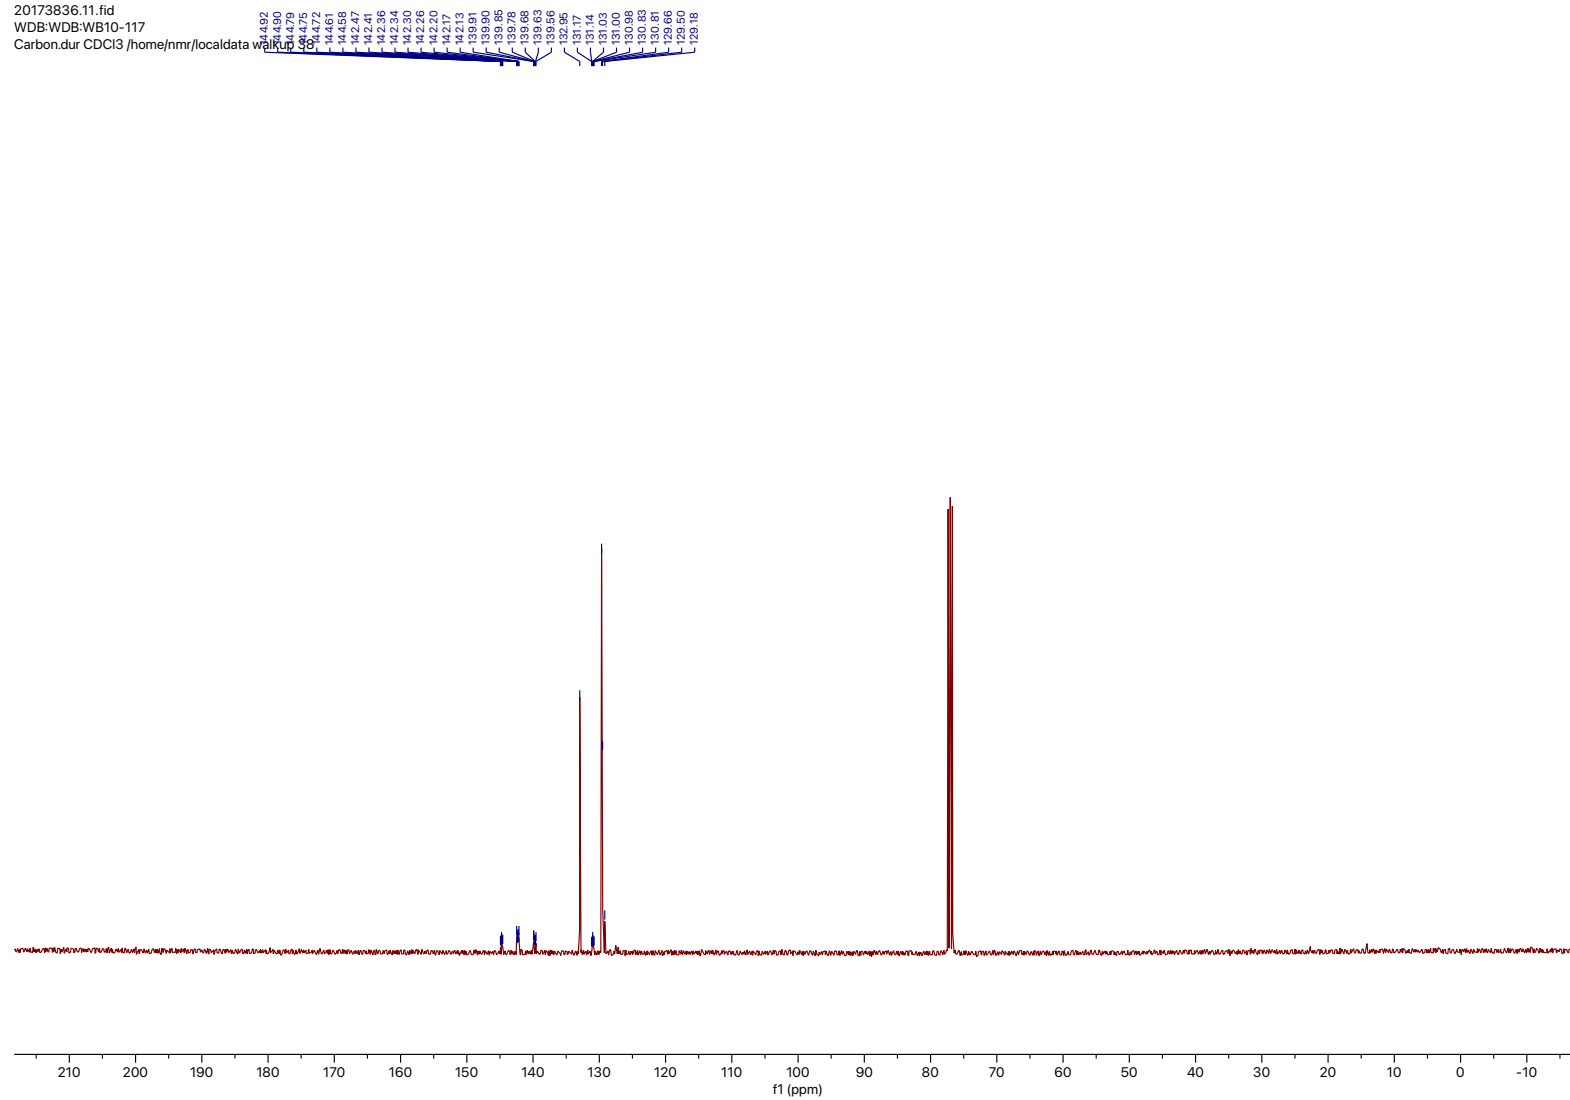

Figure S31.  $^{13}\text{C}\{^1\text{H}\}$  NMR spectrum of **11** recorded at 101 MHz in  $\text{CDCl}_3$ .

14145459.10.fid  
WDB:WDB:WB-4Br  
Proton1.icon CDCl3 /home/nmr/localdata/walkup 16

7.54  
7.52  
7.46  
7.40

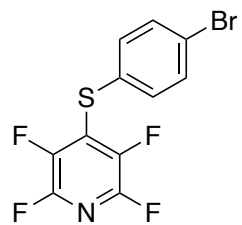

**12**

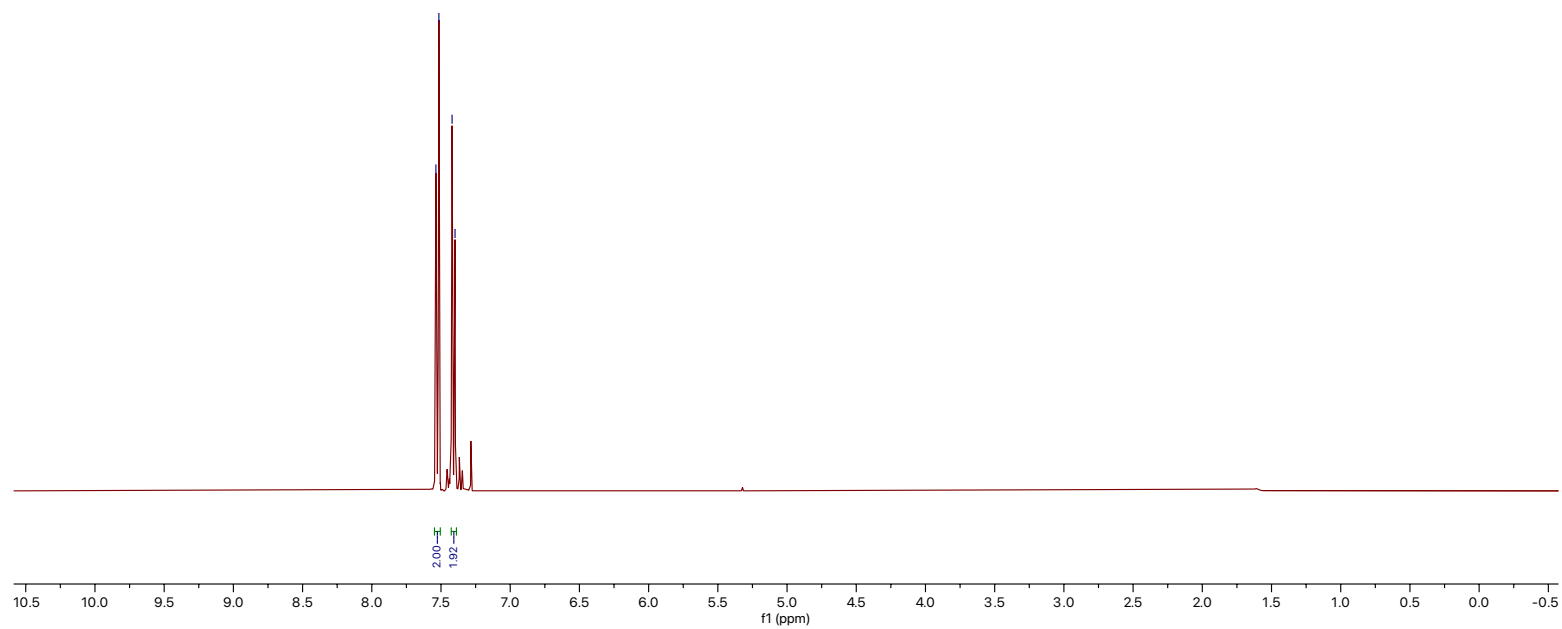

**Figure S32.**  $^1\text{H}$  NMR spectrum of **12** recorded at 400 MHz in  $\text{CDCl}_3$ .

17144533.72.fid  
WDB:VGD:VGD\_01\_02 F19\_4 bromothiophenol  
F19\_limits\_dec.dur CDC377rom9nmr/localdata/walkup 22

136.10  
136.10  
136.14  
136.14  
136.20  
136.24  
136.24  
136.27

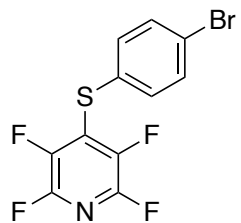

**12**

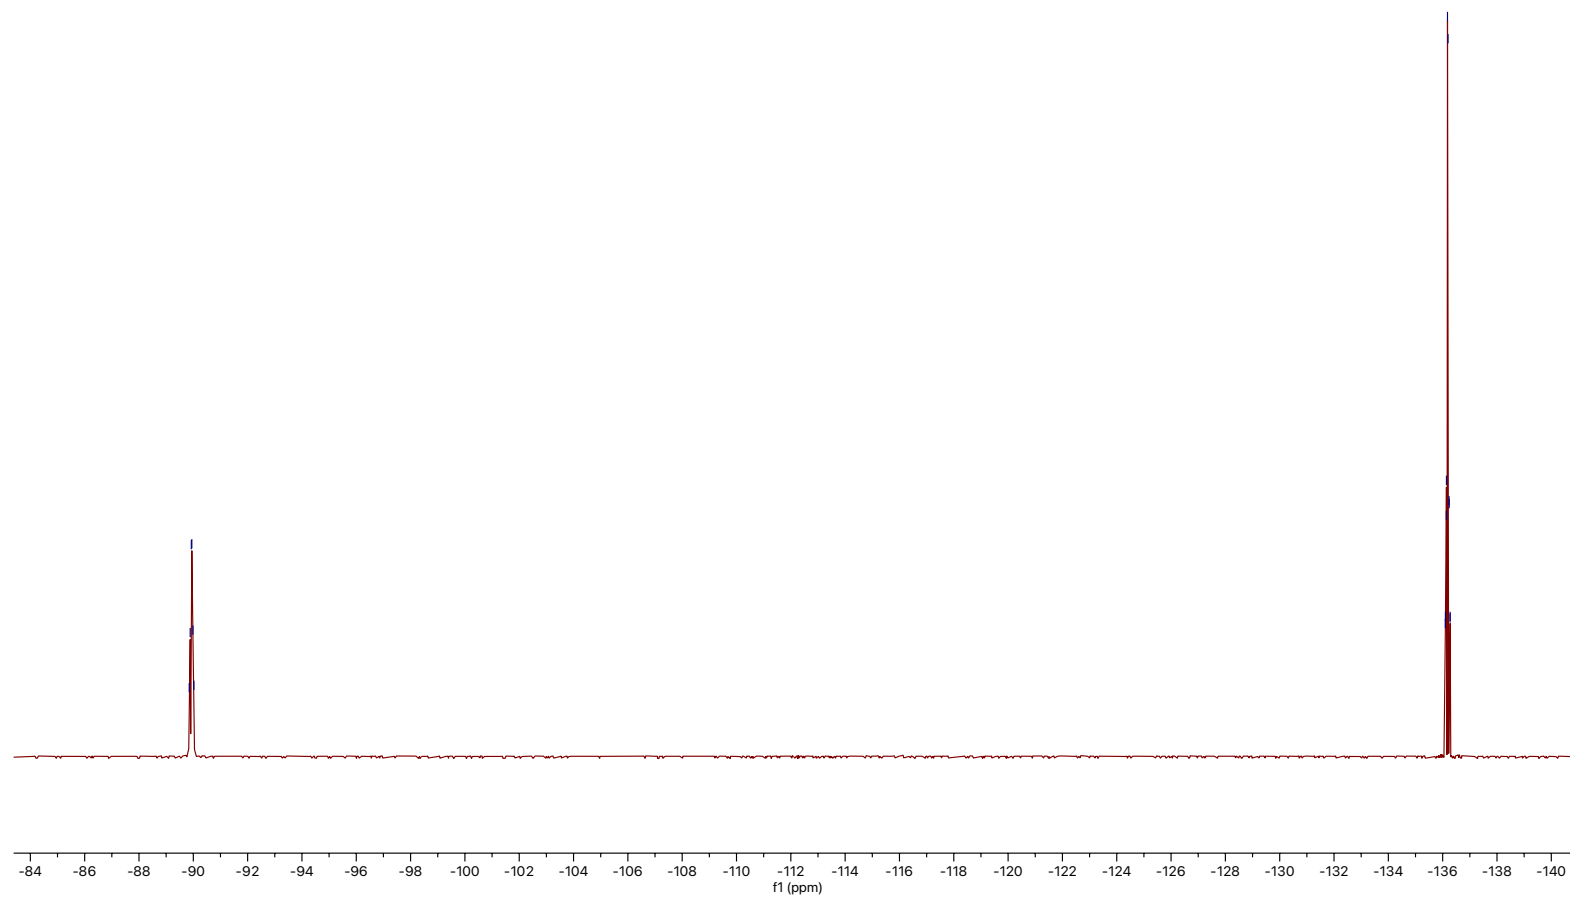

**Figure S33.**  $^{19}\text{F}\{^1\text{H}\}$  NMR spectrum of **12** recorded at 376 MHz in  $\text{CDCl}_3$ .

14145459.11.fid  
WDB:WDB-WB-4Br  
Carbon.dur CDCl3 /home/nmr/localdata/walkup

144.93  
144.76  
144.73  
144.59  
144.44  
142.37  
142.31  
142.22  
142.16  
142.16  
139.86  
139.80  
138.64  
138.59  
138.52  
138.42  
137.87  
133.23  
130.42  
130.25  
130.25  
130.08  
128.36  
128.22  
124.17

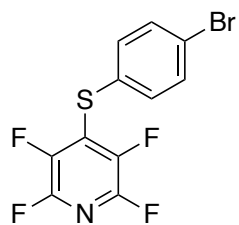

**12**

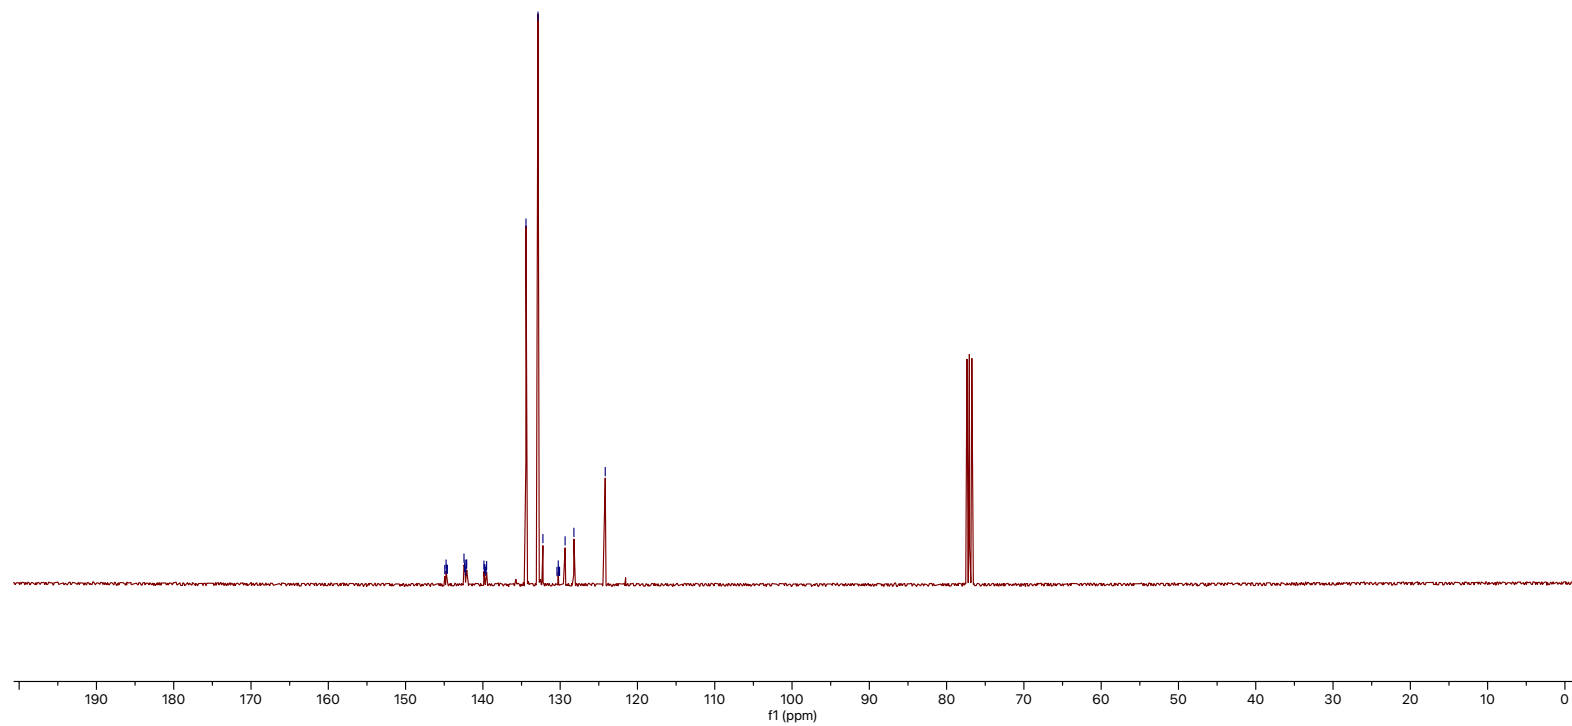

**Figure S34.**  $^{13}\text{C}\{^1\text{H}\}$  NMR spectrum of **12** recorded at 101 MHz in  $\text{CDCl}_3$ .

14145519.10.fid  
WDB:WDB:WB-4Cl  
Proton1.icon CDCl3 /home/nmr/localdata/walkup/17

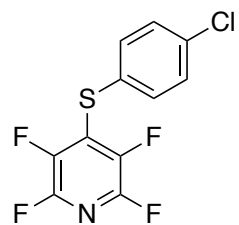

**13**

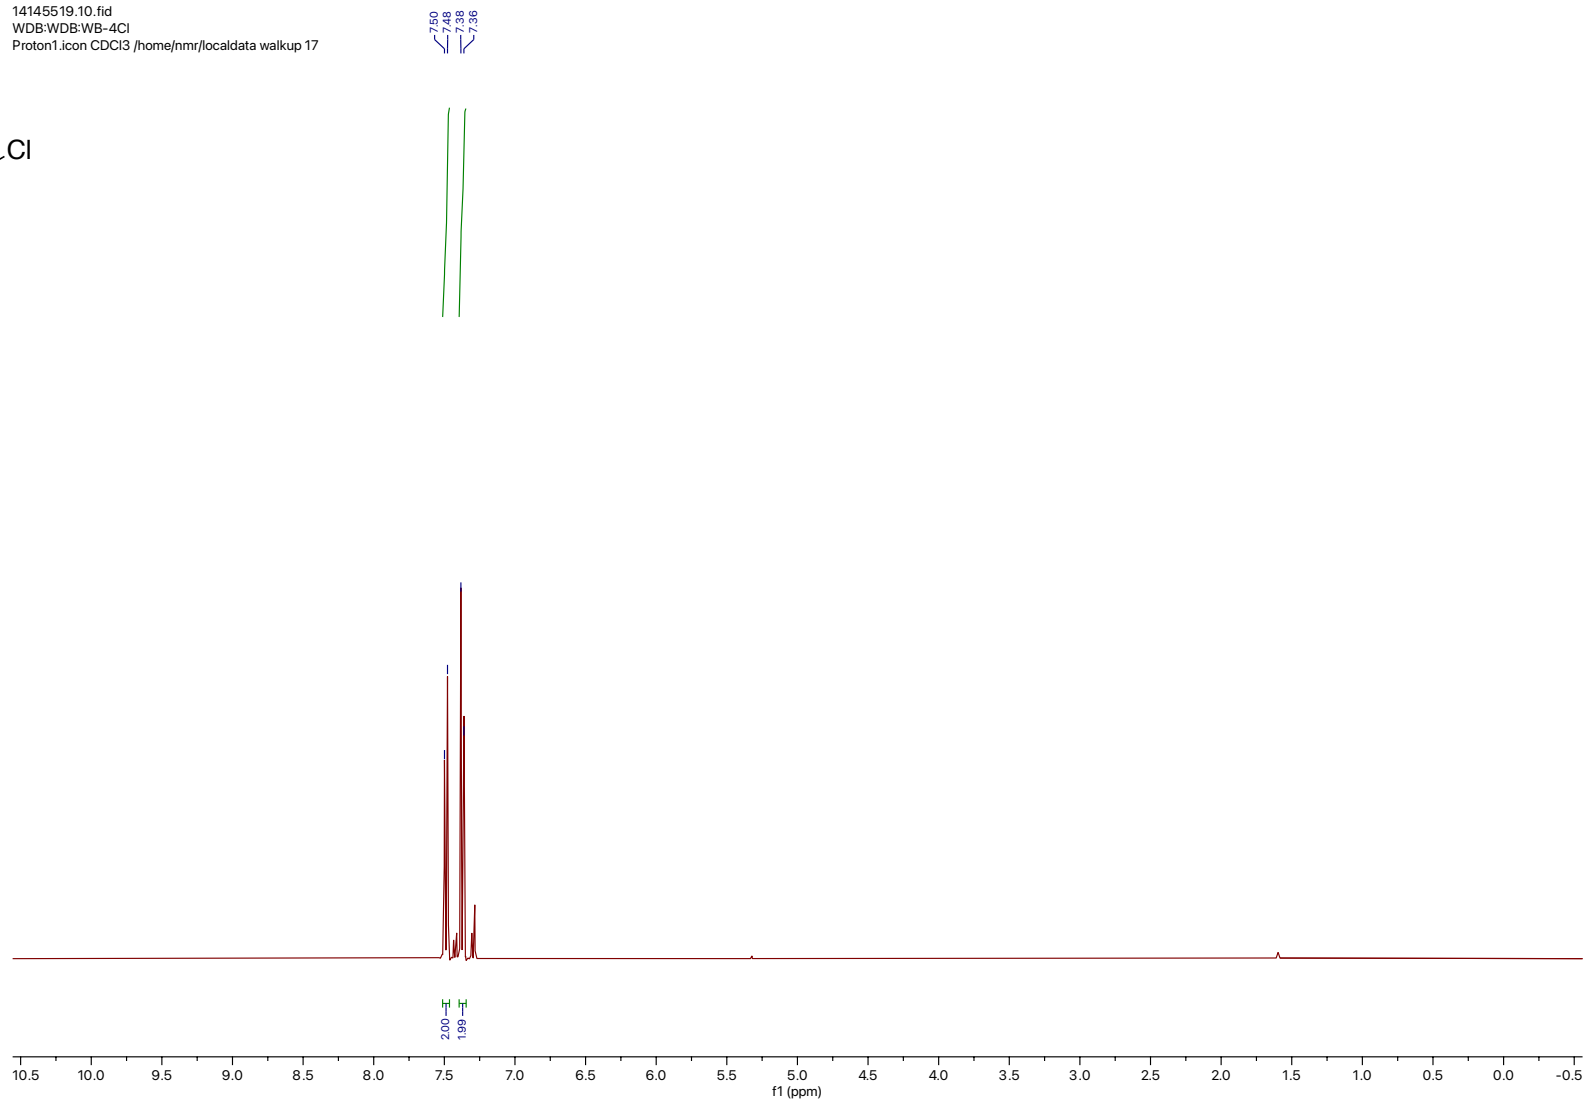

**Figure S35.**  $^1\text{H}$  NMR spectrum of **13** recorded at 400 MHz in  $\text{CDCl}_3$ .

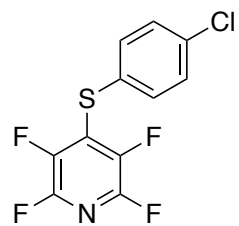

**13**

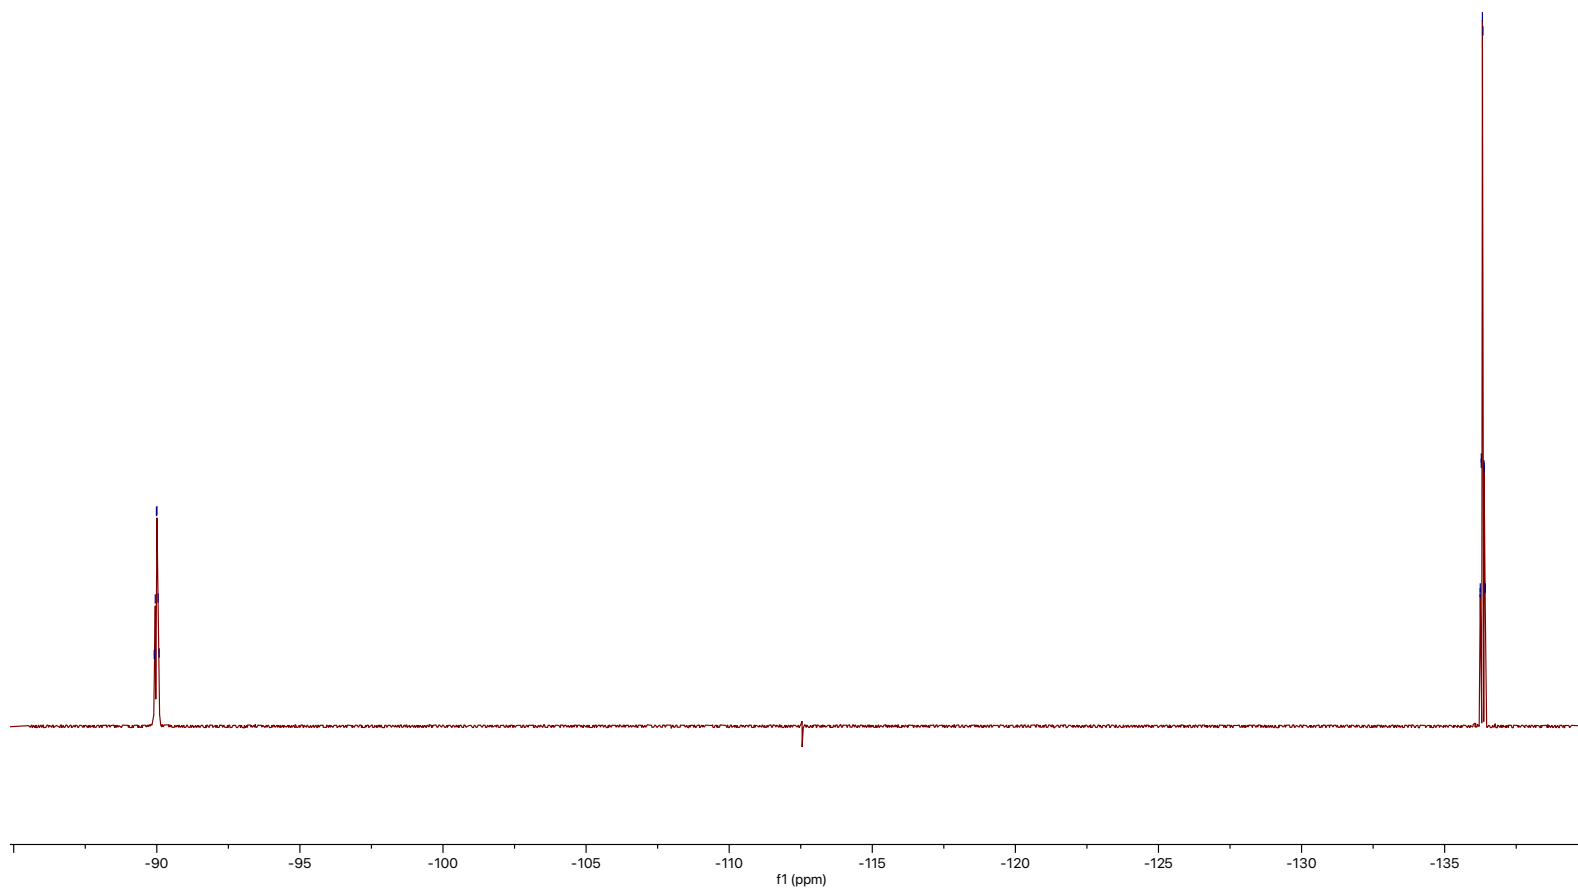

**Figure S36.**  $^{19}\text{F}\{^1\text{H}\}$  NMR spectrum of **13** recorded at 376 MHz in  $\text{CDCl}_3$ .

14145519.11.fid  
WDB:WDB-WB-4Cl  
Carbon.dur CDCl3 /home/nmr/localdata/wakeup

149.93  
149.90  
144.56  
144.50  
144.472  
144.59  
142.48  
142.41  
142.39  
142.30  
142.17  
142.19  
142.13  
142.06  
139.94  
139.77  
139.71  
139.61  
139.56  
139.48  
138.09  
134.34  
130.61  
130.44  
130.44  
130.28  
129.91  
129.31  
127.59  
127.49  
127.47

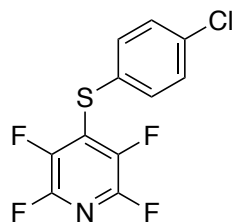

**13**

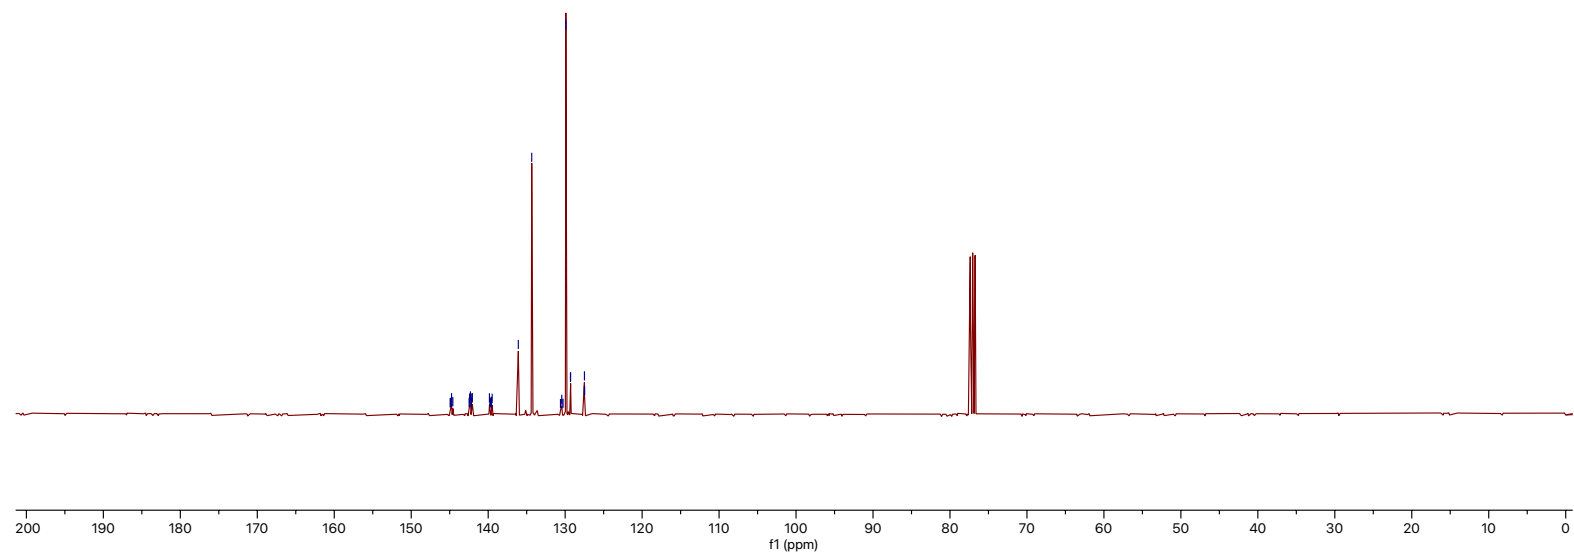

Figure S37.  $^{13}\text{C}\{^1\text{H}\}$  NMR spectrum of **13** recorded at 101 MHz in  $\text{CDCl}_3$ .

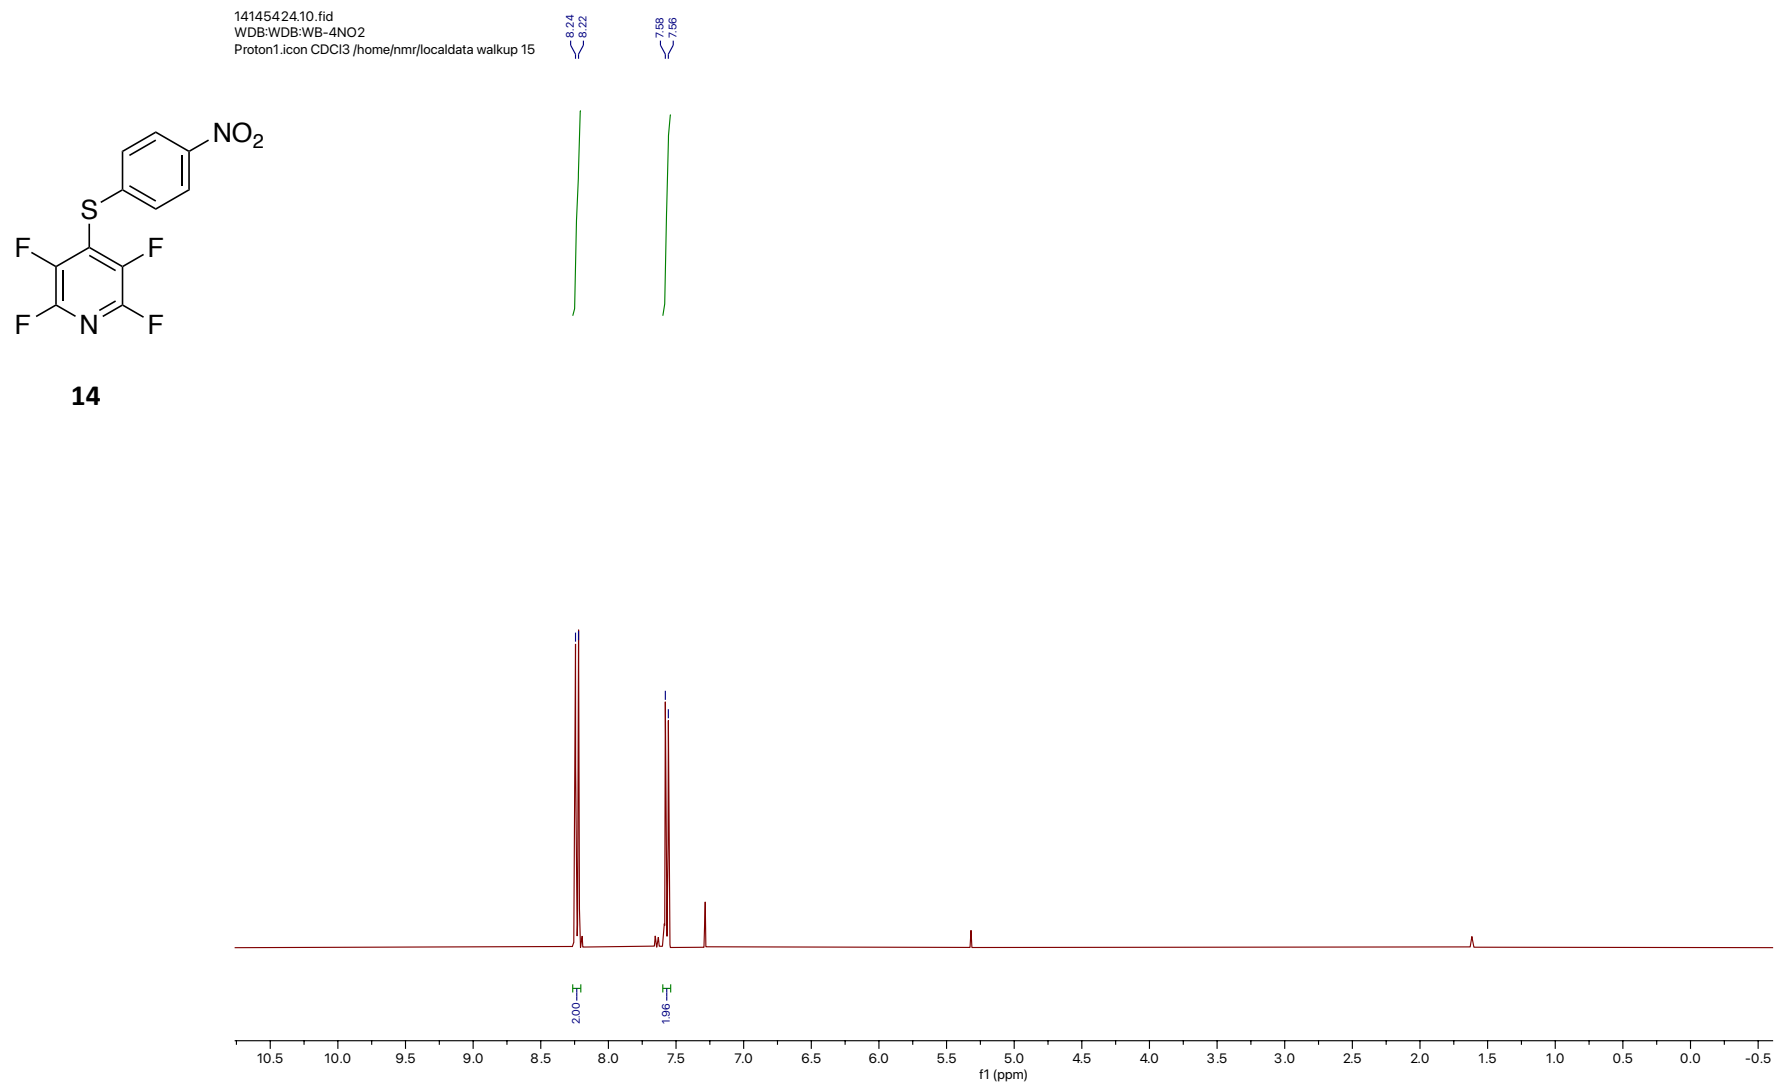

**Figure S38.**  $^1\text{H}$  NMR spectrum of **14** recorded at 400 MHz in  $\text{CDCl}_3$ .

05183255.53.fid  
WDB-VGD-VGD\_03\_01\_16\_24 Nitrothioether  
F19\_limits\_dec.dif C:\Users\jhmie\nmr\localdata\walkup 55

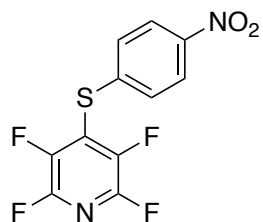

**14**

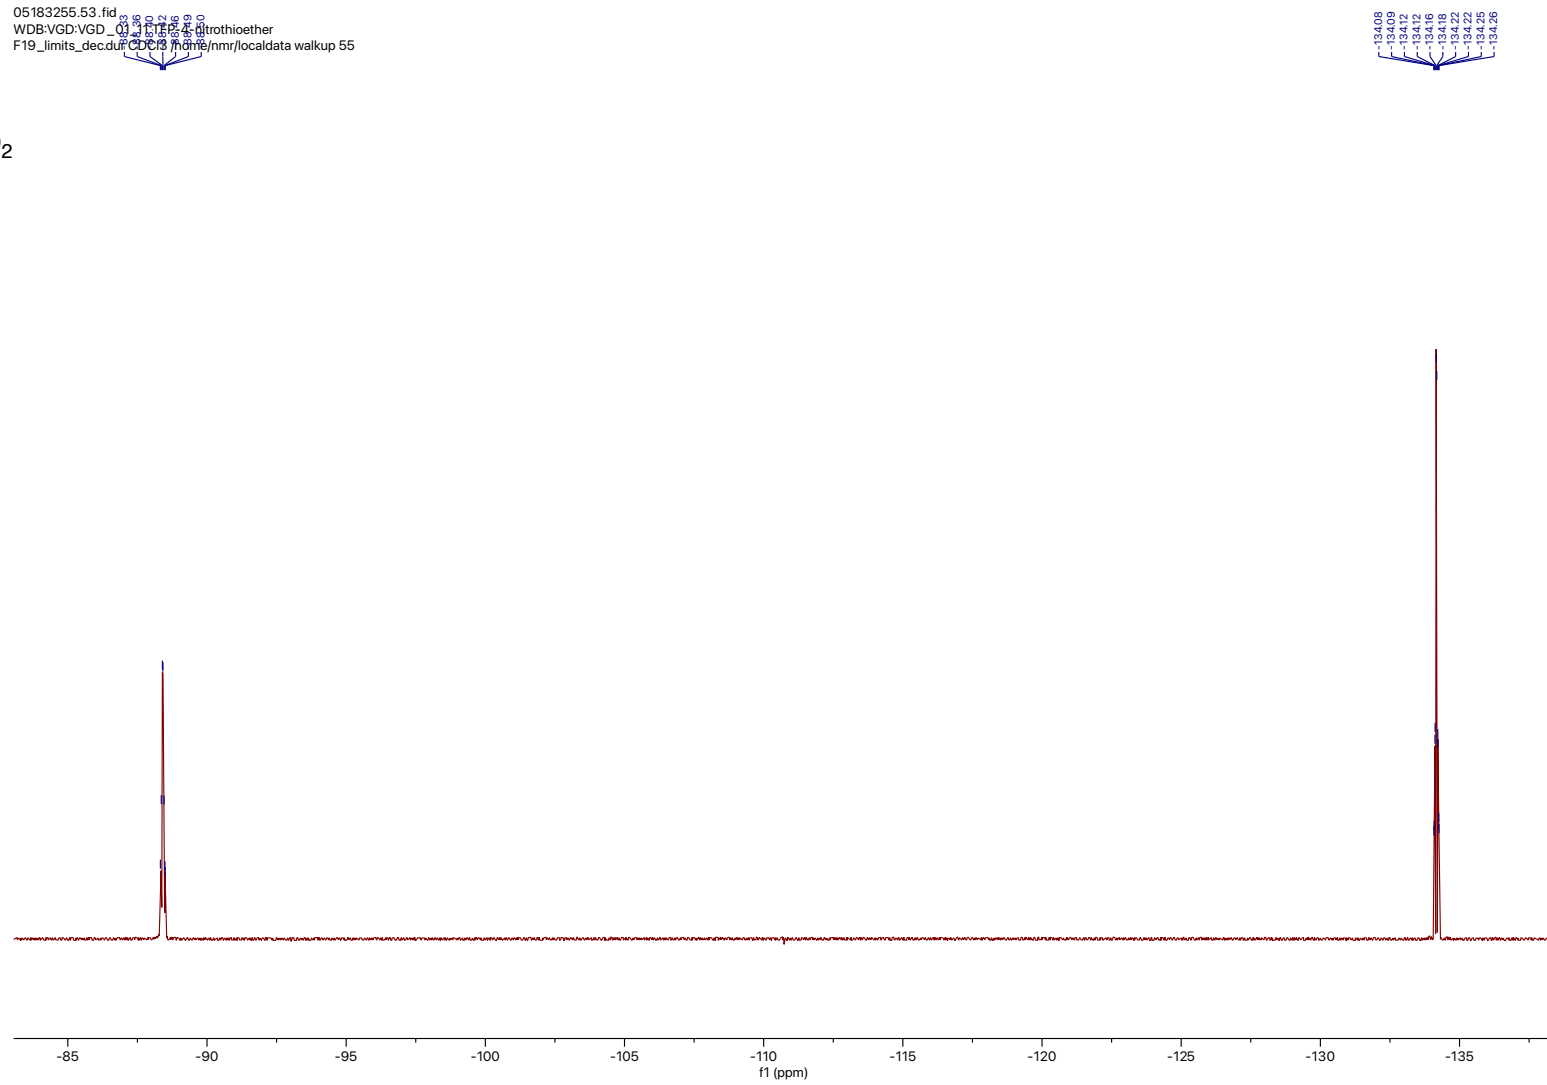

**Figure S39.**  $^{19}\text{F}\{^1\text{H}\}$  NMR spectrum of **14** recorded at 376 MHz in  $\text{CDCl}_3$ .

14145424.11.fid  
WDB:WDB:WB-4NO2  
Carbon.dur CDCl3 /home/nmr/localdata/walrus/19

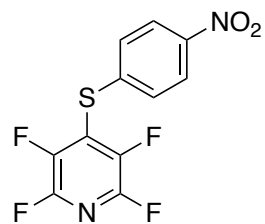

**14**

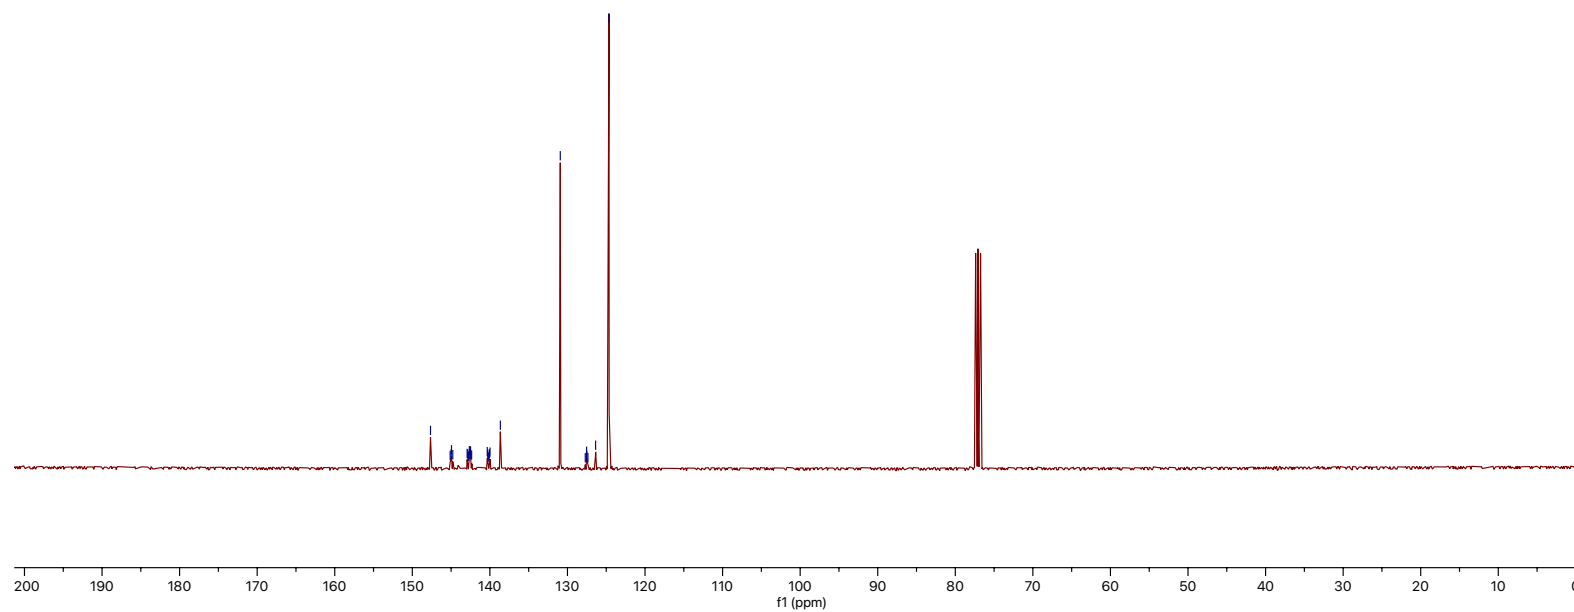

Figure S40.  $^{13}\text{C}\{^1\text{H}\}$  NMR spectrum of **14** recorded at 101 MHz in  $\text{CDCl}_3$ .

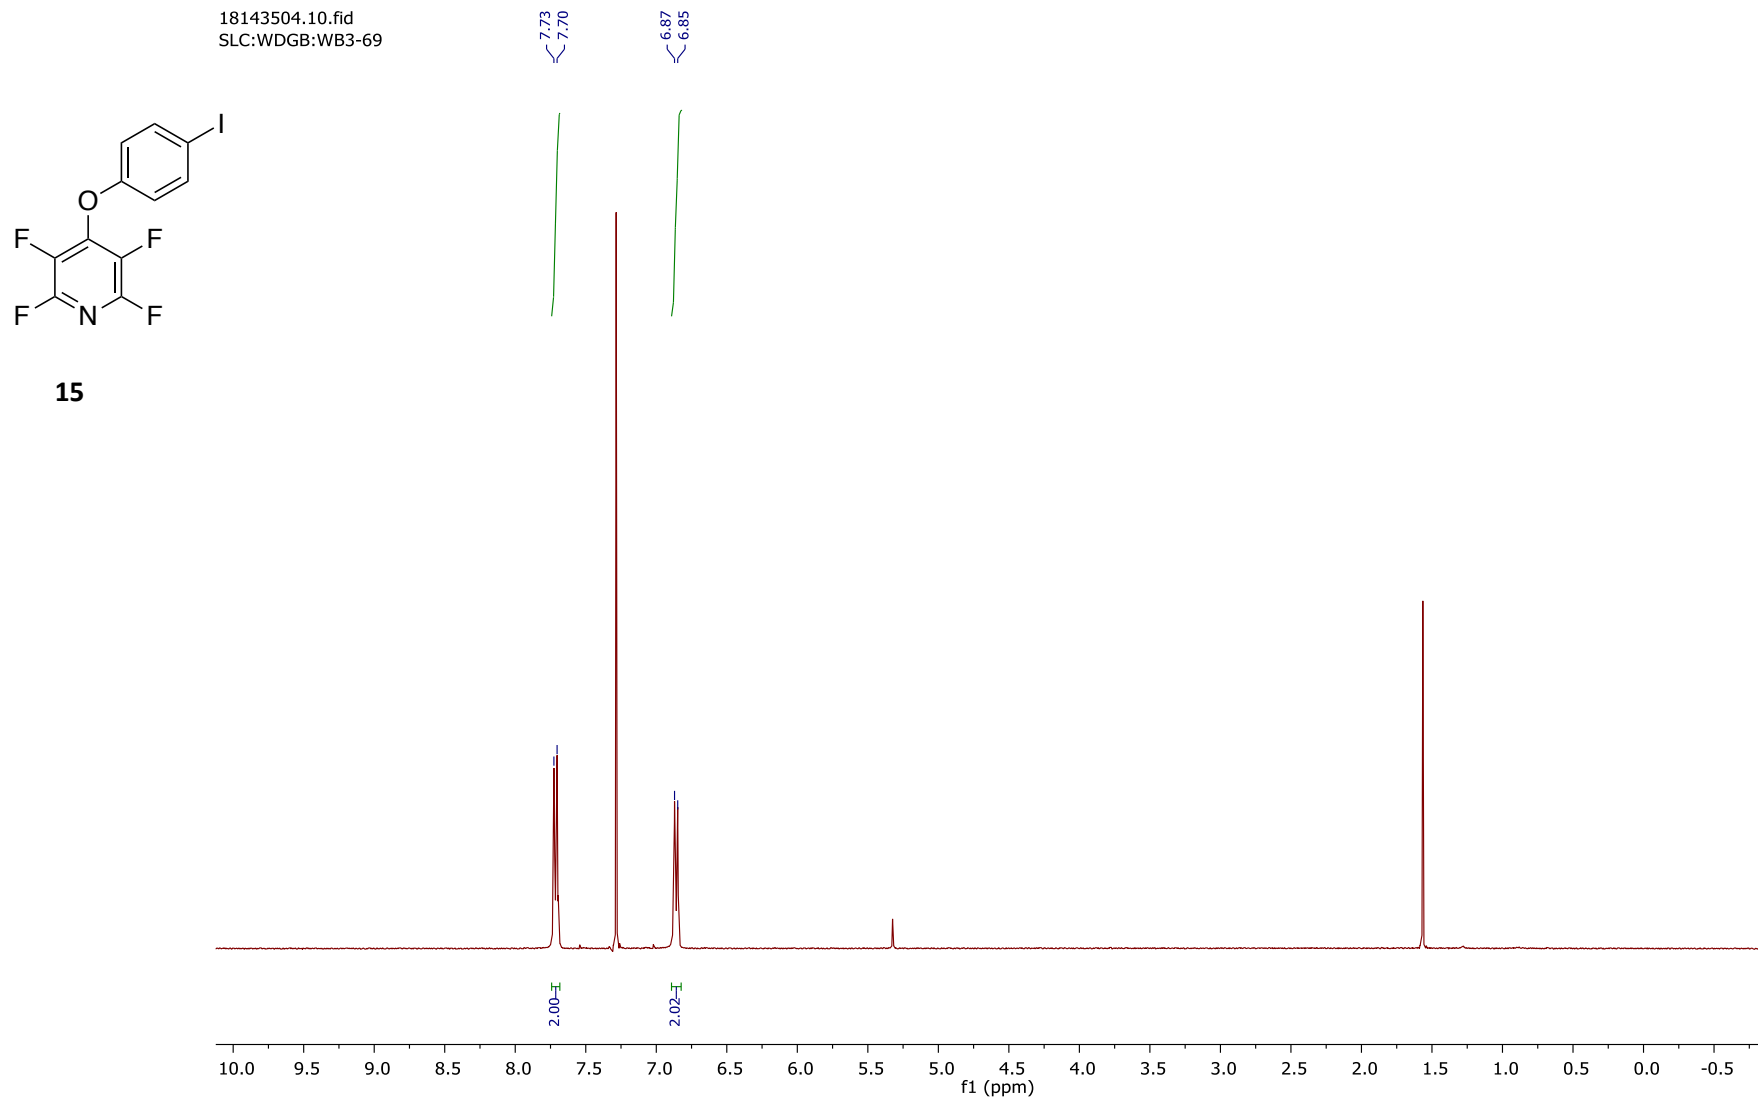

**Figure S41.**  $^1\text{H}$  NMR spectrum of **15** recorded at 400 MHz in  $\text{CDCl}_3$ .

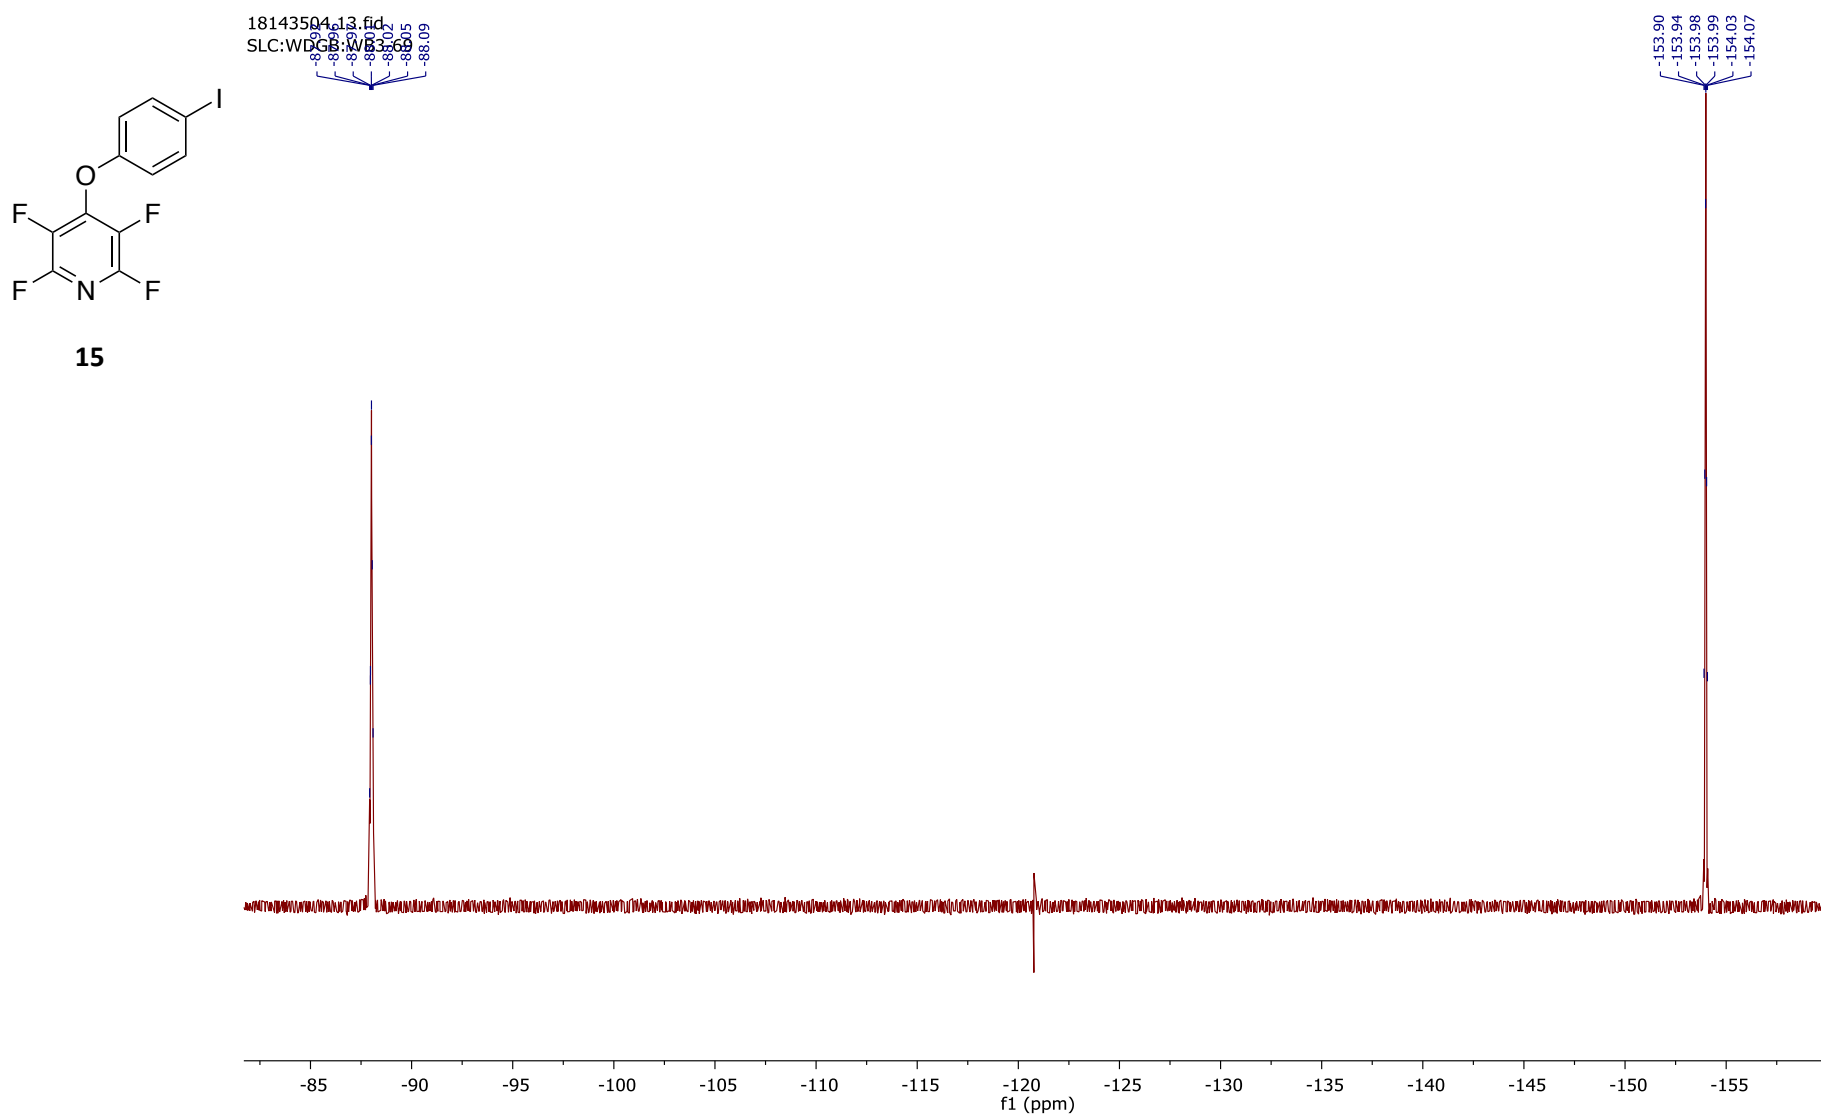

Figure S42.  $^{19}\text{F}\{^1\text{H}\}$  NMR spectrum of **15** recorded at 376 MHz in  $\text{CDCl}_3$ .

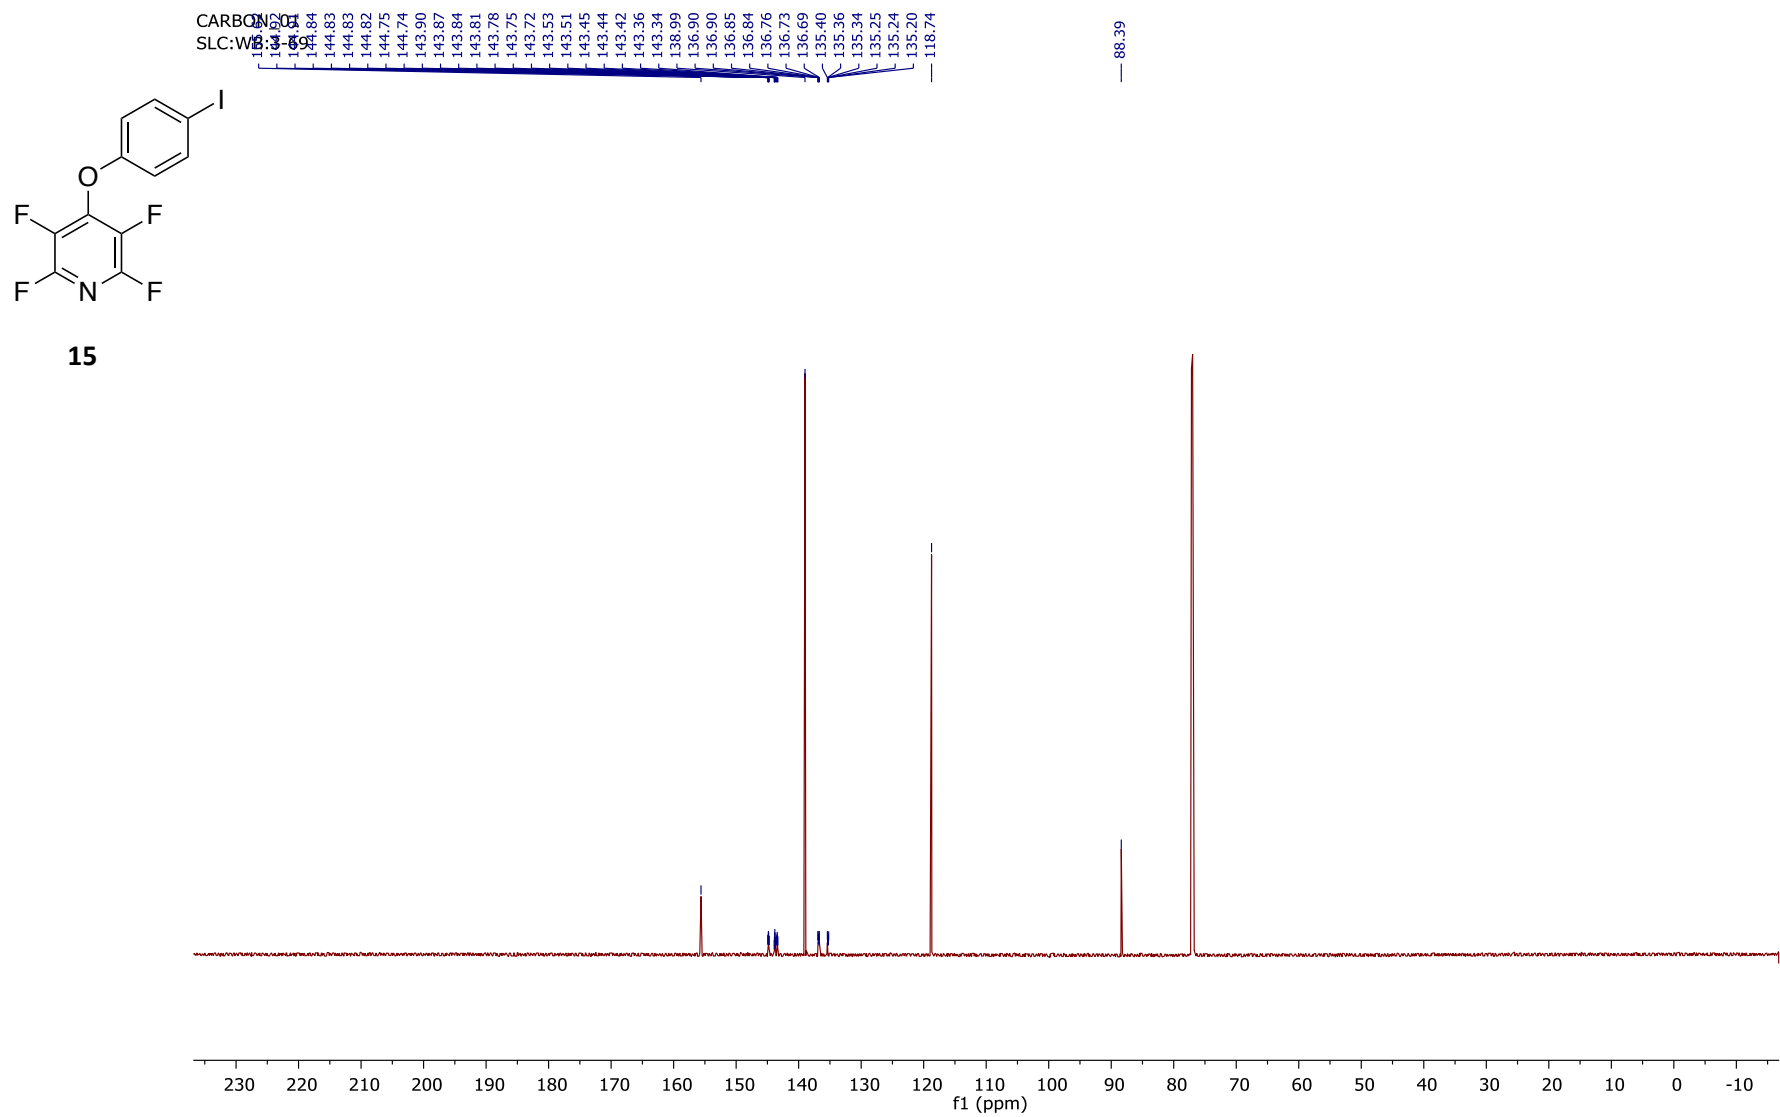

Figure S43.  $^{13}\text{C}\{^1\text{H}\}$  NMR spectrum of **15** recorded at 101 MHz in  $\text{CDCl}_3$ .

11134045.10.fid  
WDB:WDB:WB-4CIOTCP  
Proton.dur CDCl3 /home/hmr/localdata/walkup 19

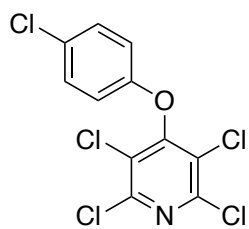

**16**

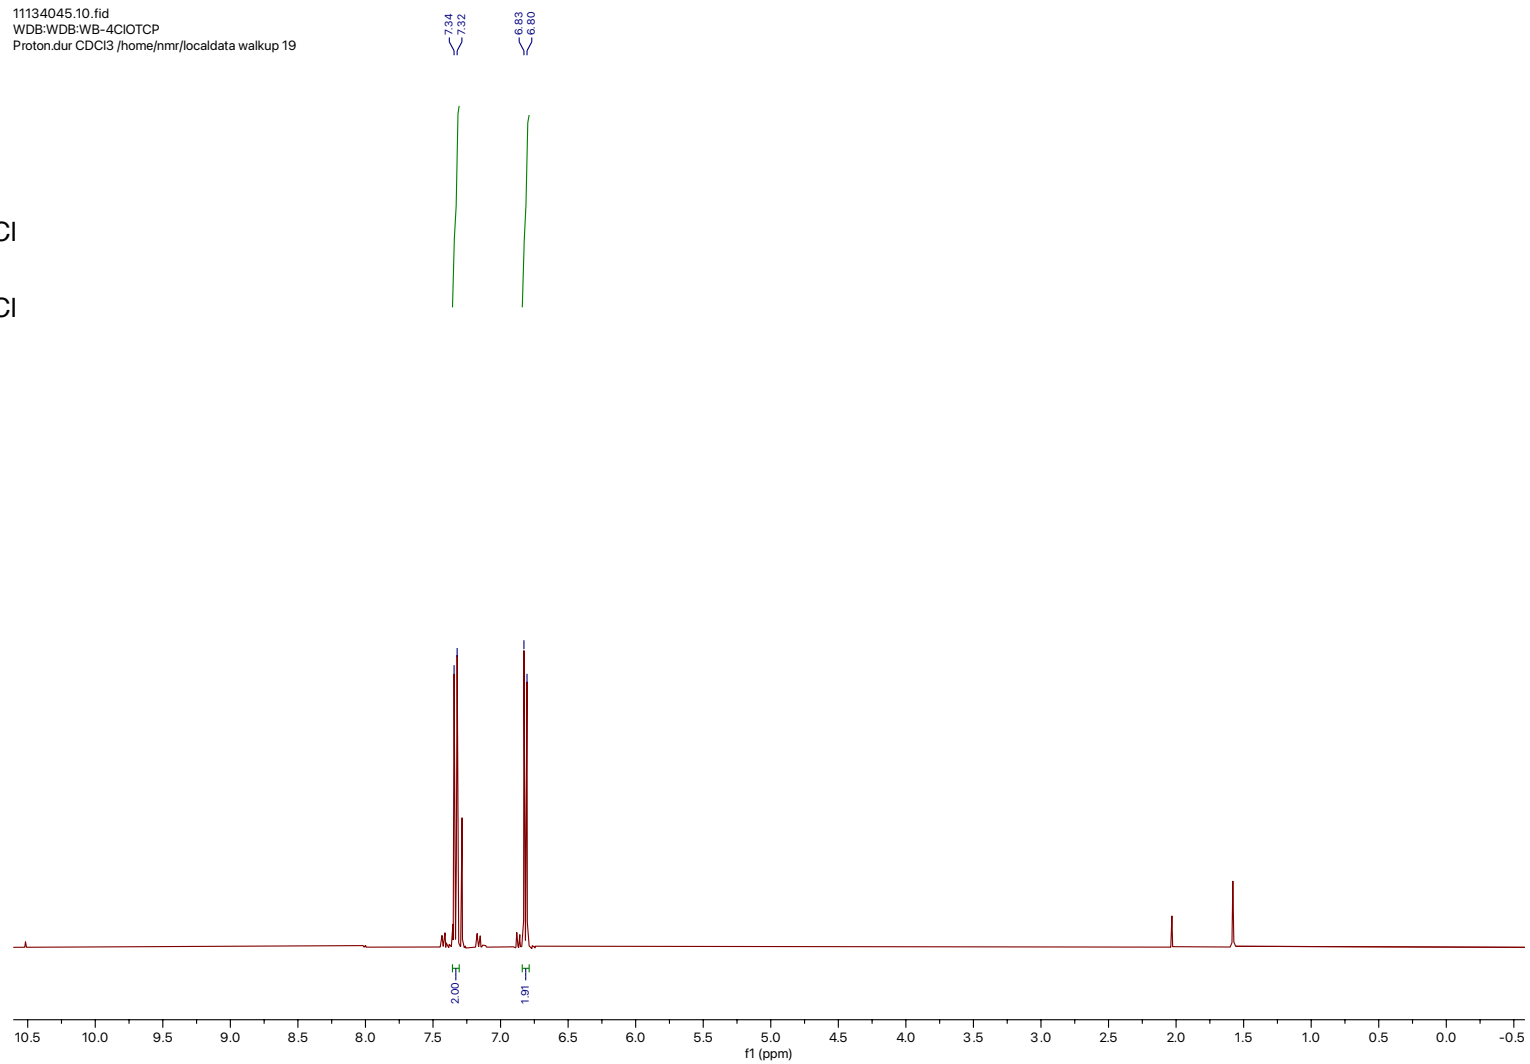

**Figure S44.**  $^1\text{H}$  NMR spectrum of **16** recorded at 400 MHz in  $\text{CDCl}_3$ .

11134045.11.fid  
WDB:WDB:WB-4CIOTCP  
Carbon.dur CDCl3 /home/nmr/localdata walkup 19

156.99  
153.70  
147.36  
130.97  
129.93  
125.48  
116.80

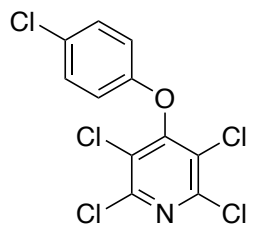

**16**

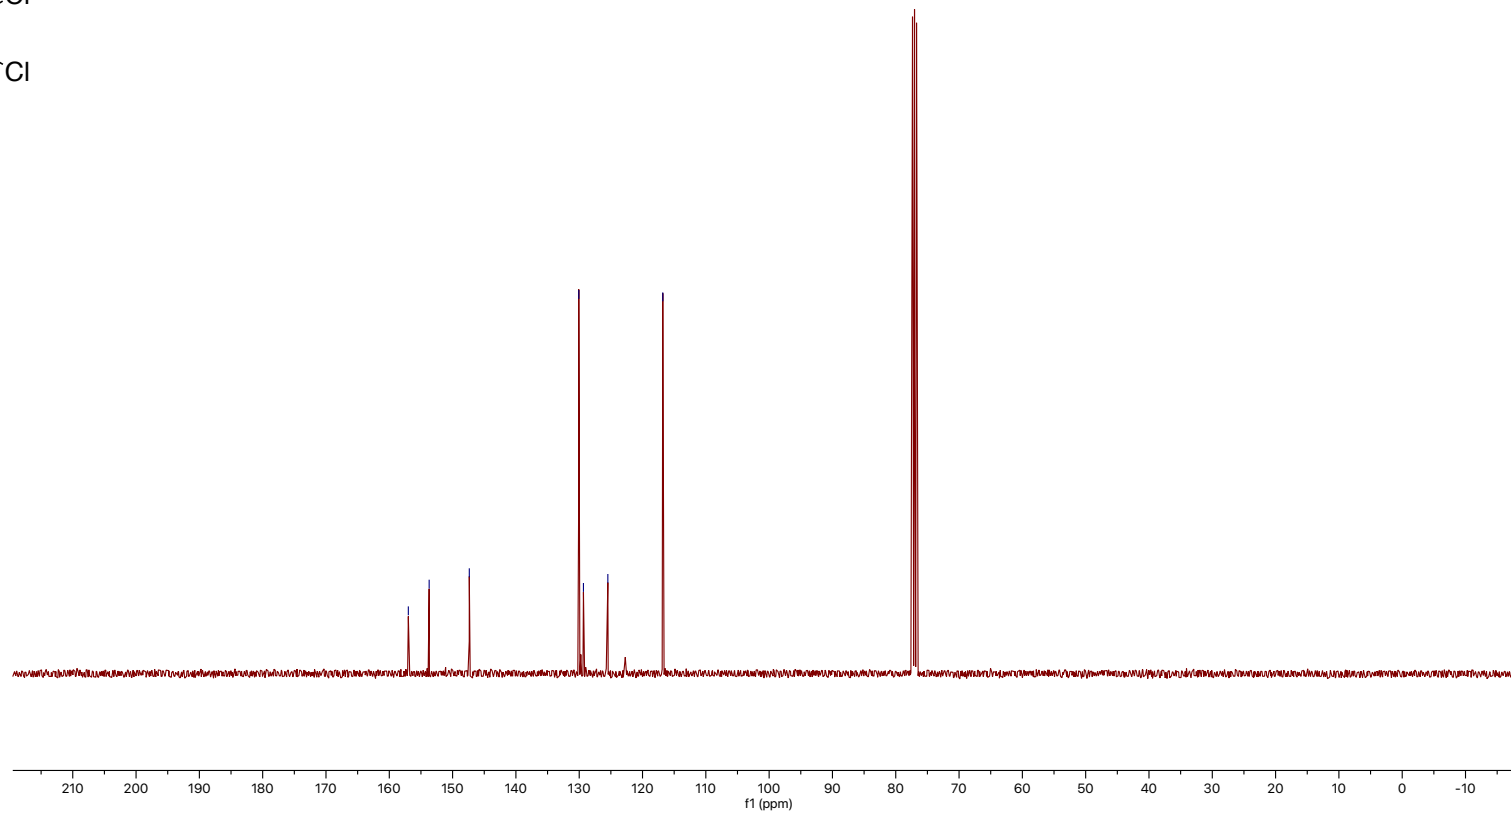

**Figure S45.**  $^{13}\text{C}\{^1\text{H}\}$  NMR spectrum of **16** recorded at 101 MHz in  $\text{CDCl}_3$ .

07114443.10.fid  
WDB:WDB:WB-4Br:OTCP  
Proton1.icon CDCl3 /home/nmr/localdata/walkup 3

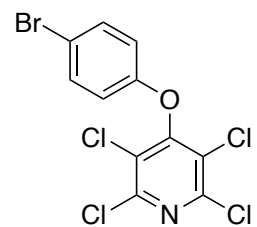

**17**

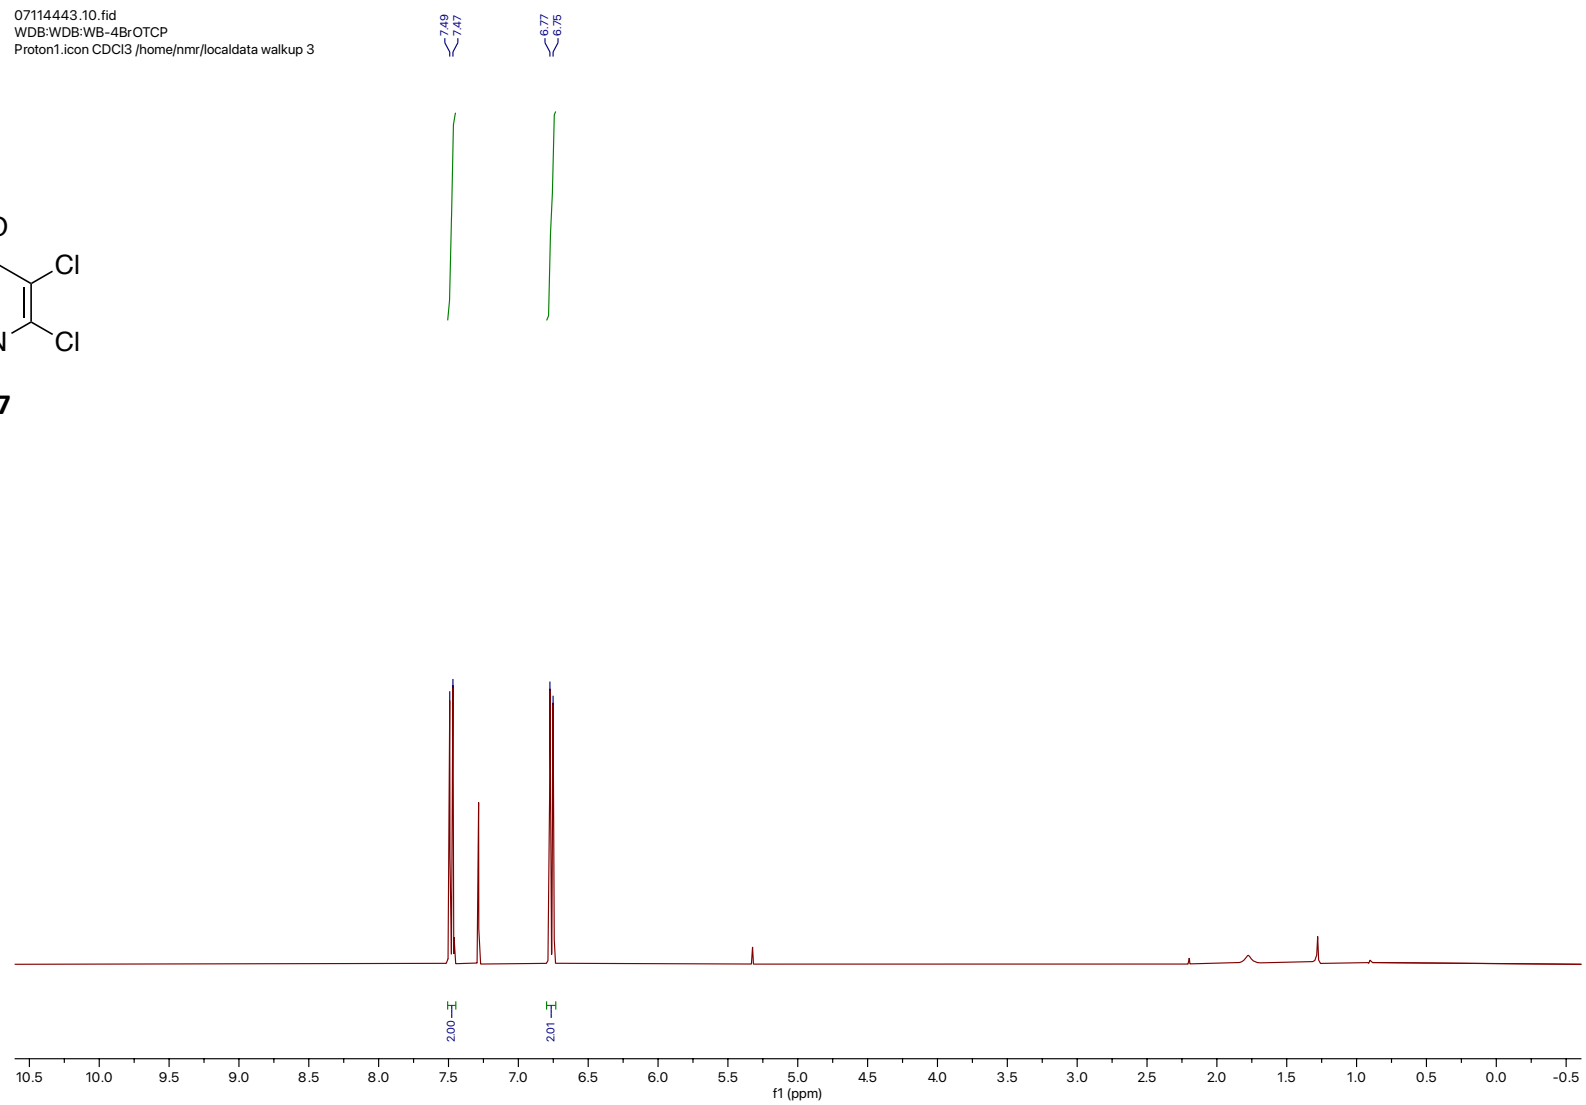

**Figure S46.**  $^1\text{H}$  NMR spectrum of **17** recorded at 400 MHz in  $\text{CDCl}_3$ .

07114443.11.fid  
WDB:WDB:WB-4BrOTCP  
Carbon.dur CDCl3 /home/nmr/localdata/walkup 3

156.90  
154.24  
147.36  
133.03  
125.47  
117.22  
116.71

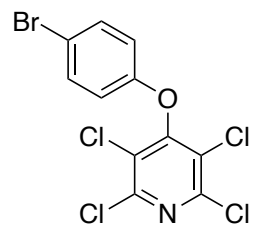

**17**

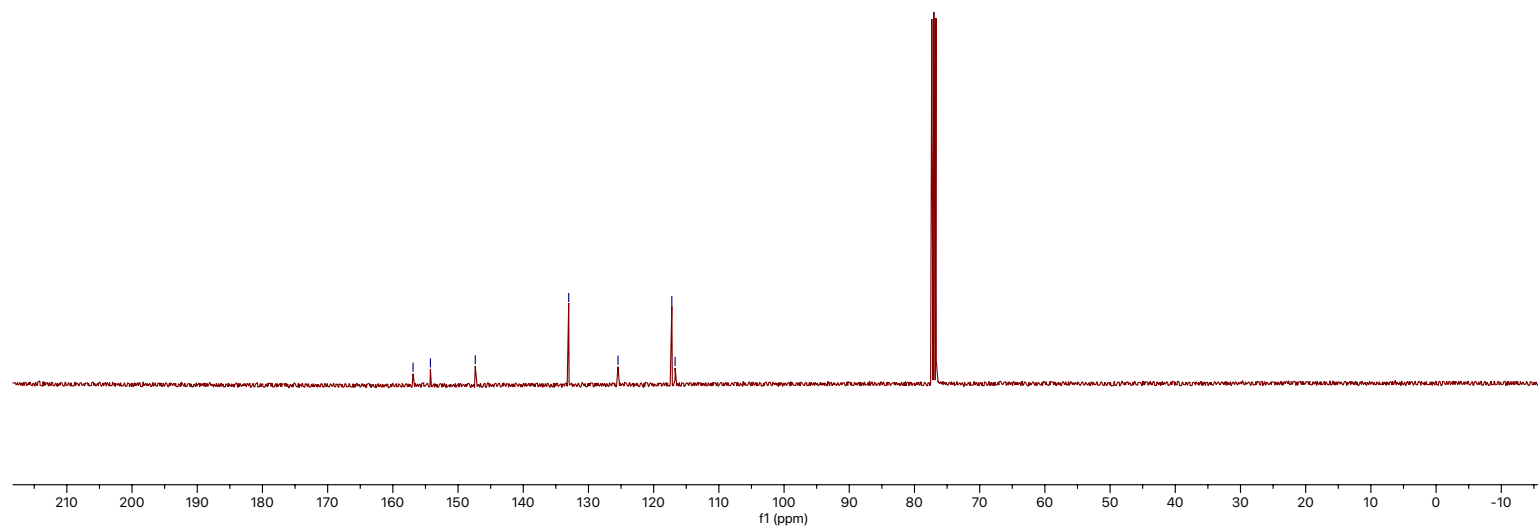

**Figure S47.**  $^{13}\text{C}\{^1\text{H}\}$  NMR spectrum of **17** recorded at 101 MHz in  $\text{CDCl}_3$ .

07114508.10.fid  
WDB:WDB:WB-4NO2OTCP  
Proton1.icon CDCl3 /home/nmr/localdata/walkup 4

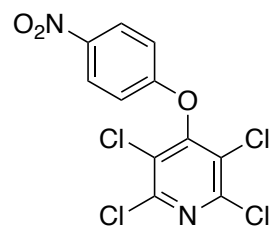

**18**

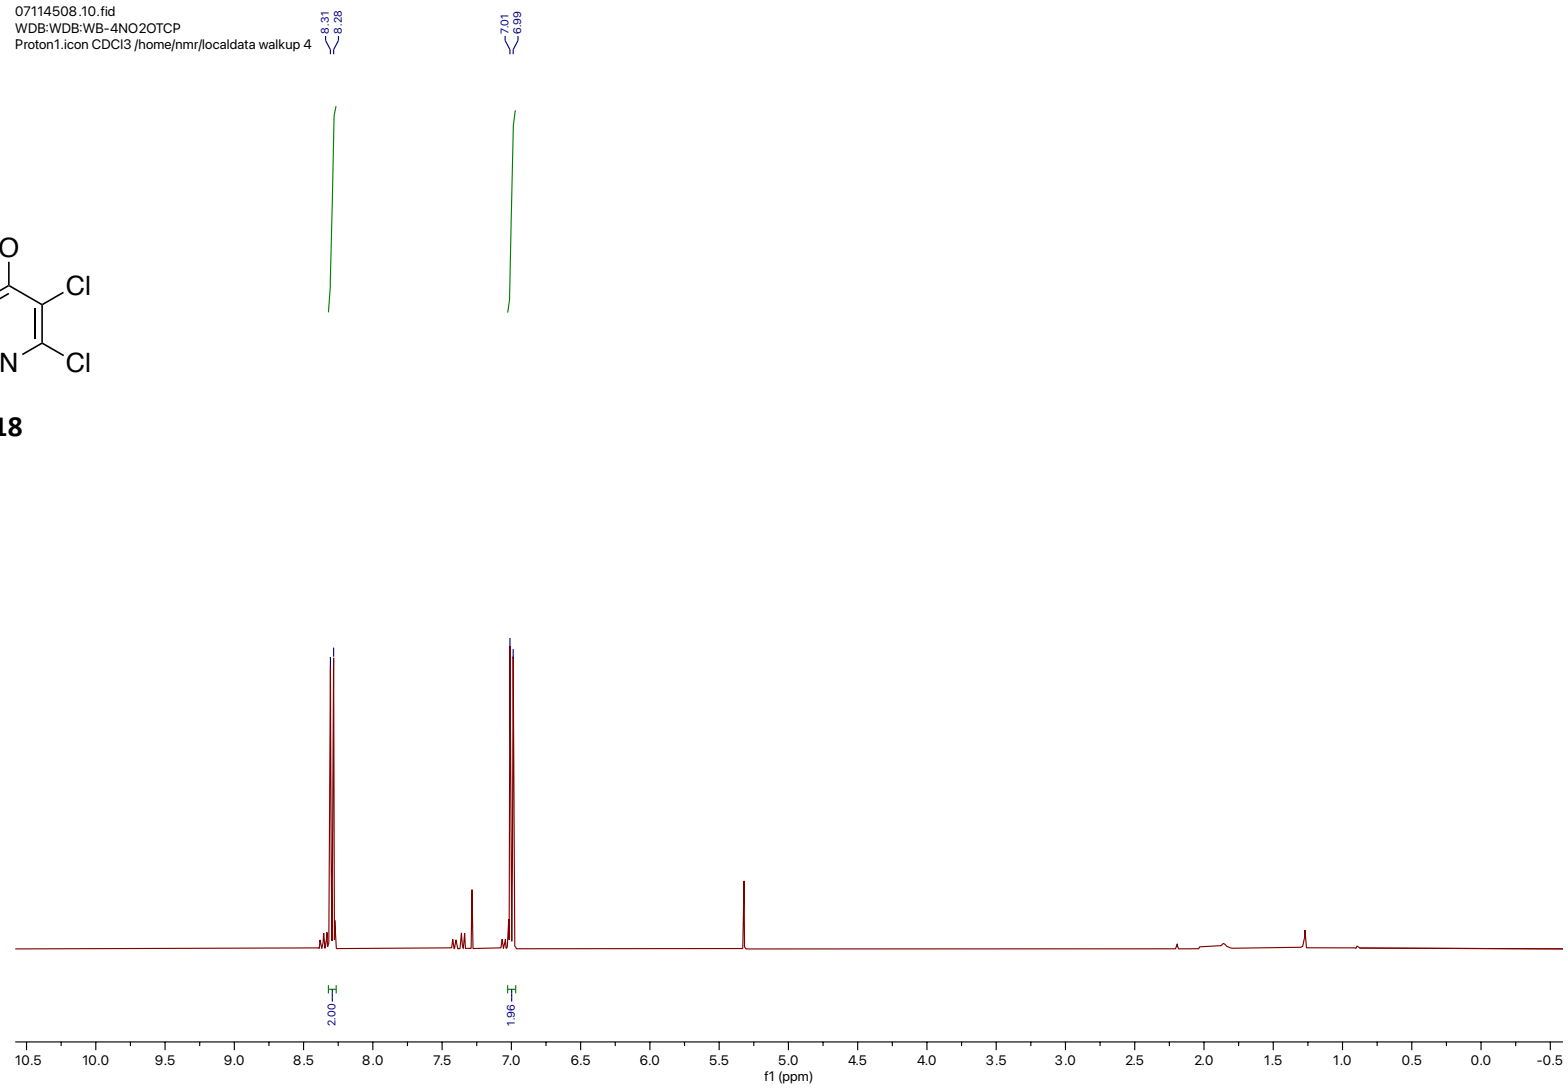

**Figure S48.**  $^1\text{H}$  NMR spectrum of **18** recorded at 400 MHz in  $\text{CDCl}_3$ .

07114508.11.fid  
WDB:WDB:WB-4NO2OTCP  
Carbon.dur CDCl3 /home/nmr/localdata walkup 4

159.19  
155.96  
147.60  
144.07  
126.34  
125.28  
115.78

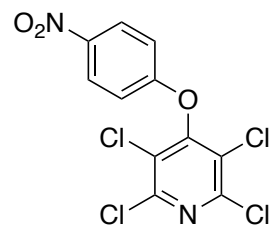

**18**

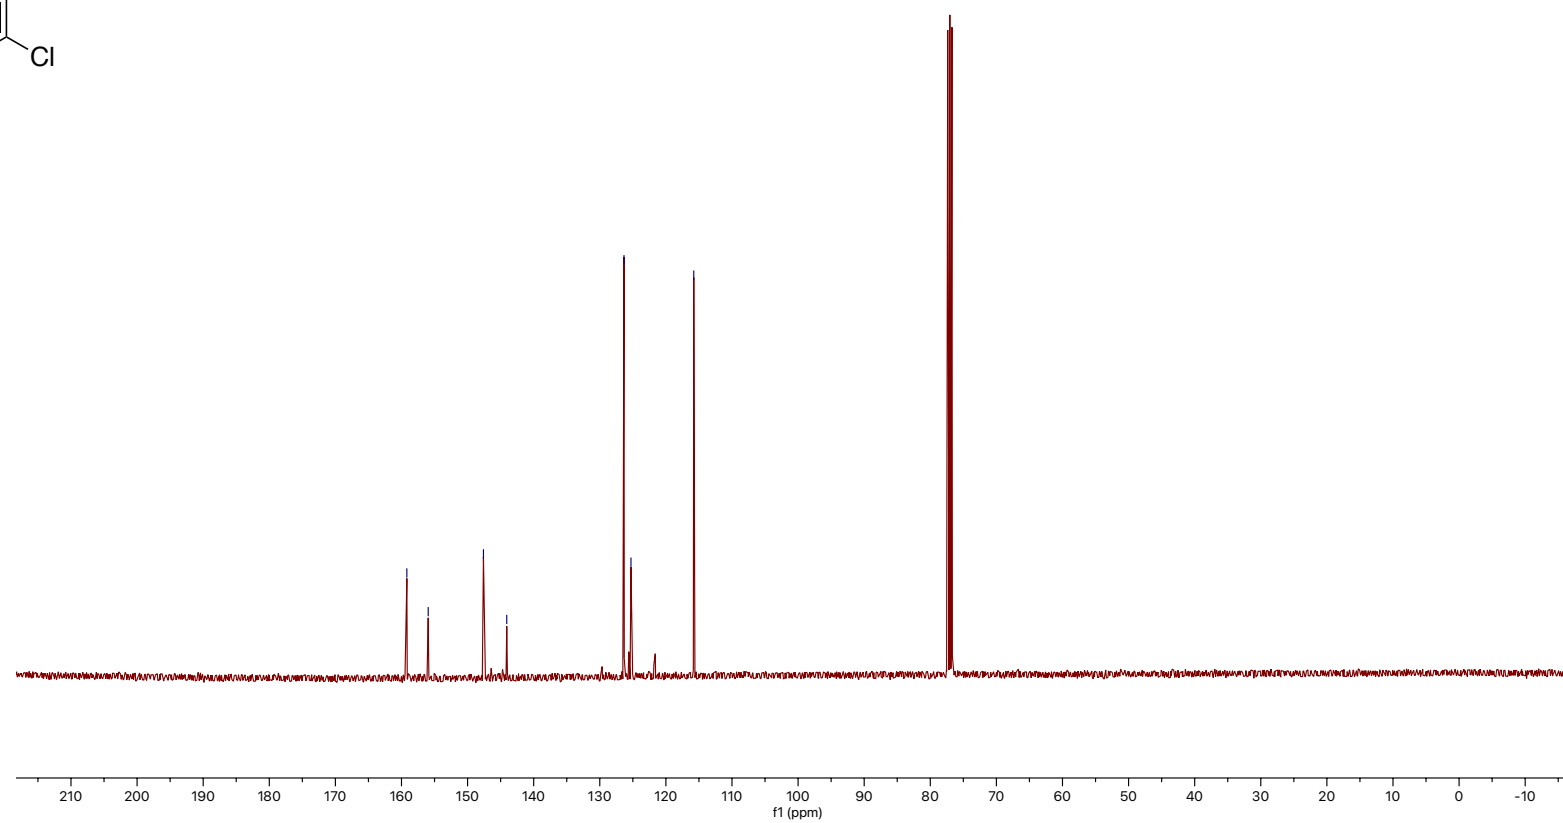

Figure S49.  $^{13}\text{C}\{^1\text{H}\}$  NMR spectrum of **18** recorded at 101 MHz in  $\text{CDCl}_3$ .

04104548.10.fid  
WDB:WDB:WB-4OMeOTCP  
Proton.dur CDCl3 /home/nmr/localdata walkup 33

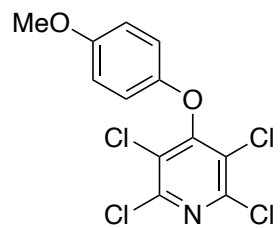

**19**

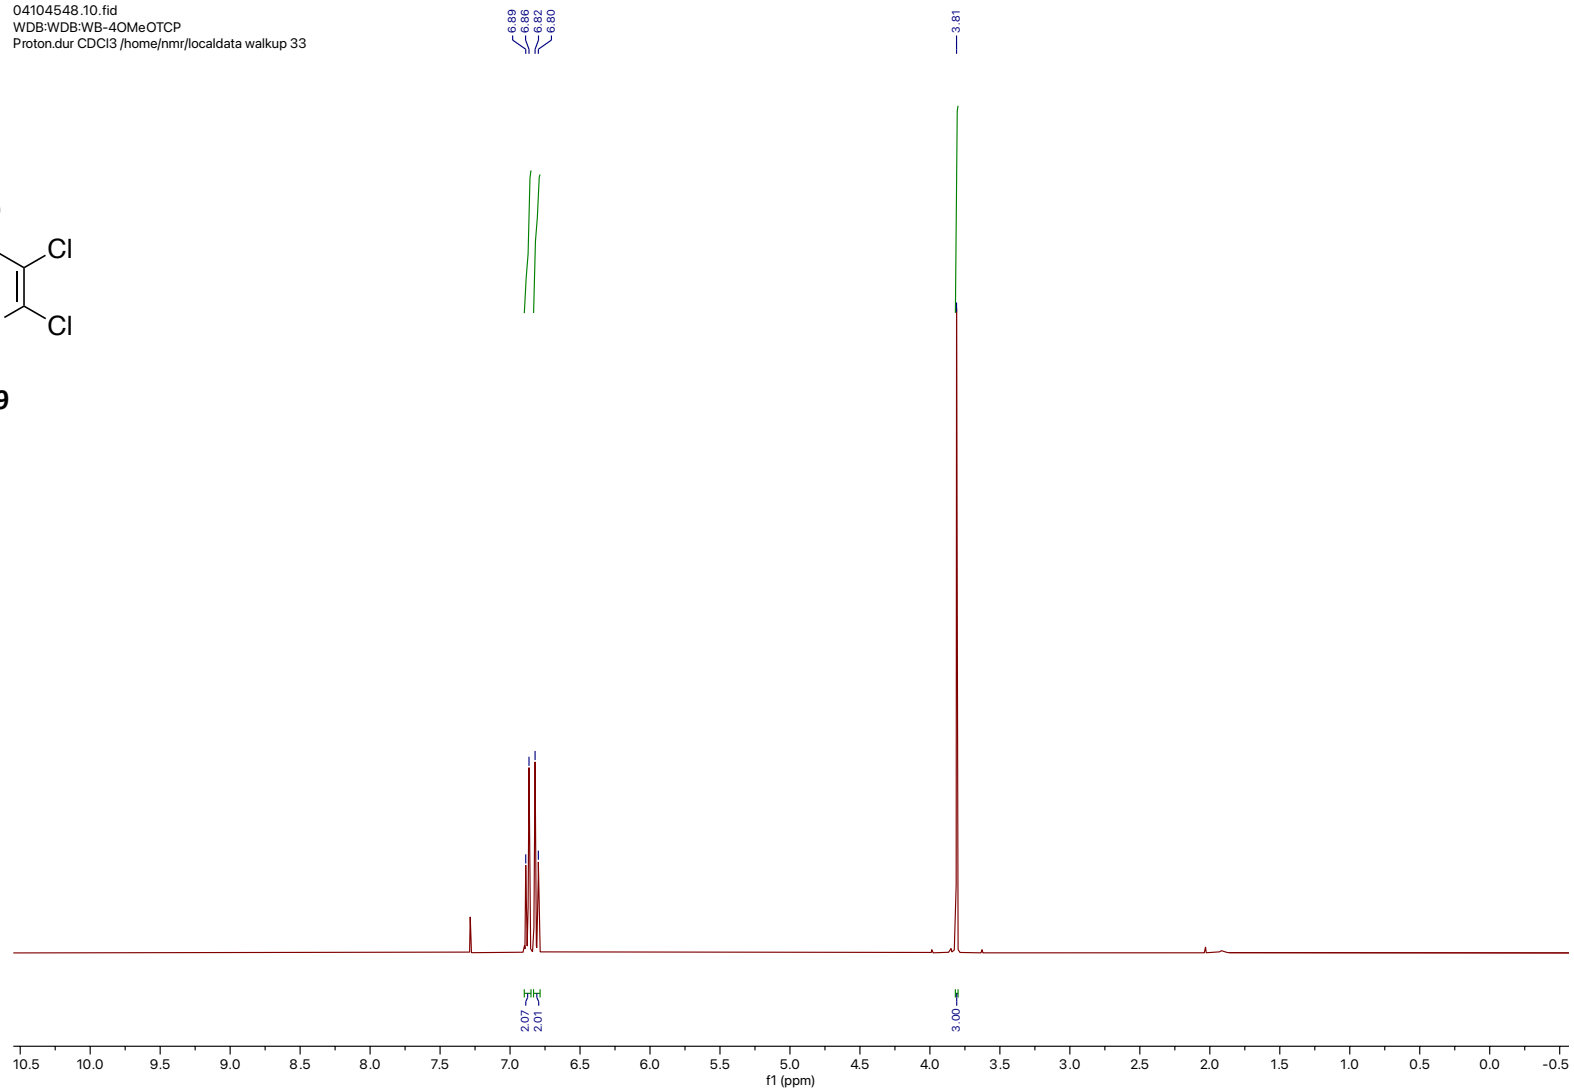

**Figure S50.**  $^1\text{H}$  NMR spectrum of **19** recorded at 400 MHz in  $\text{CDCl}_3$ .

04104548.11.fid  
WDB:WDB:WB-4OMeOTCP  
Carbon.dur CDCl3 /home/nmr/localdata/walkup/33

157.88  
156.03  
149.29  
147.21  
126.52  
116.59  
114.85  
55.70

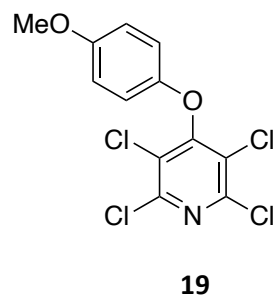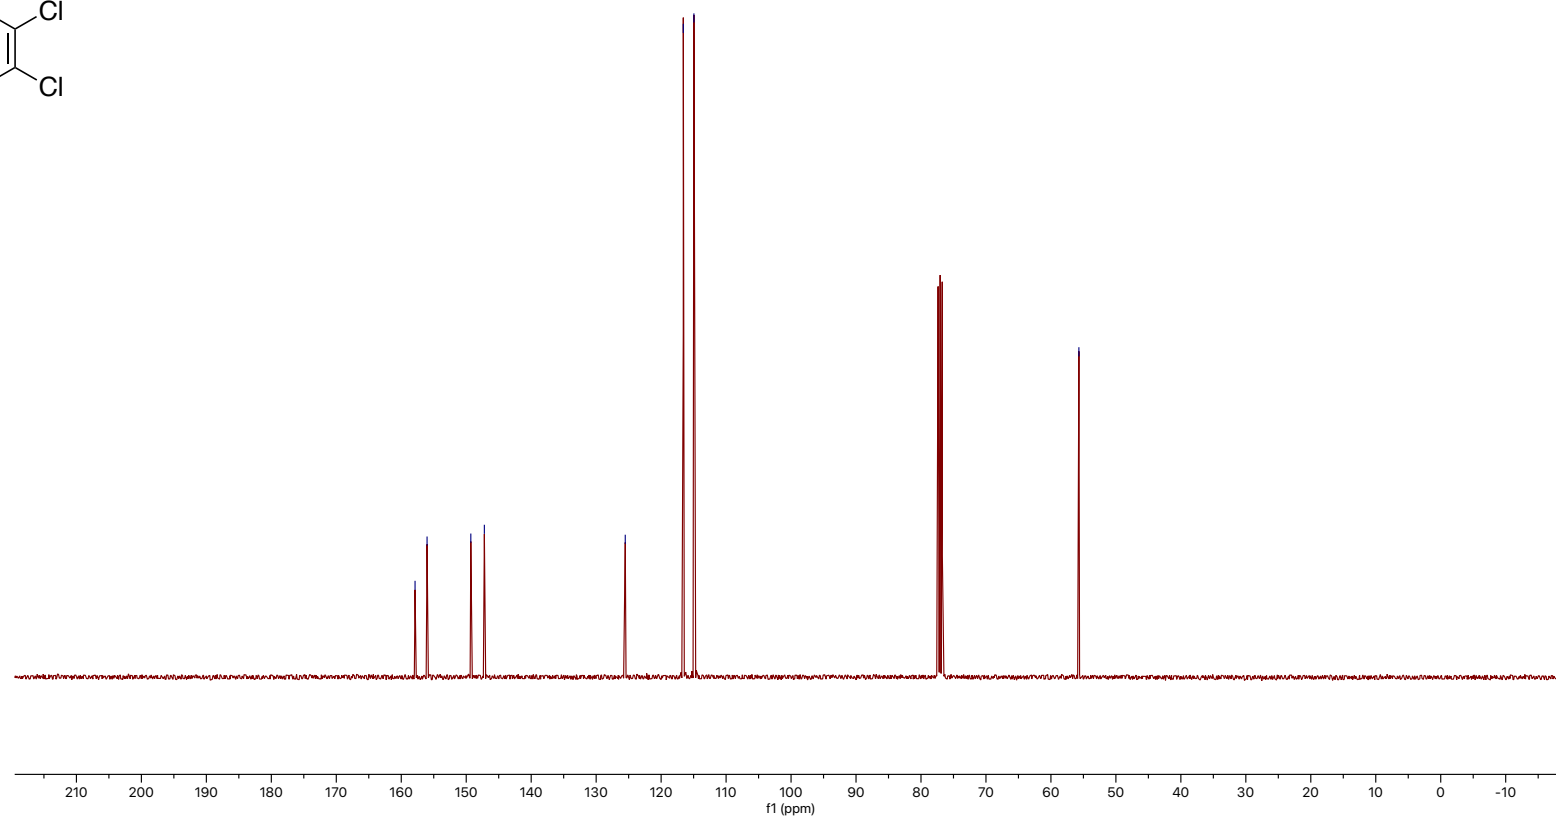

Figure S51.  $^{13}\text{C}\{^1\text{H}\}$  NMR spectrum of **19** recorded at 101 MHz in  $\text{CDCl}_3$ .

11134200.10.fid  
WDB:WDB:WB-4ClSTCP  
Proton1.icon CDCl3 /home/nmr/localdata/walkup 8

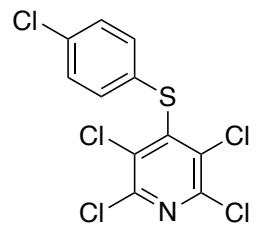

**20**

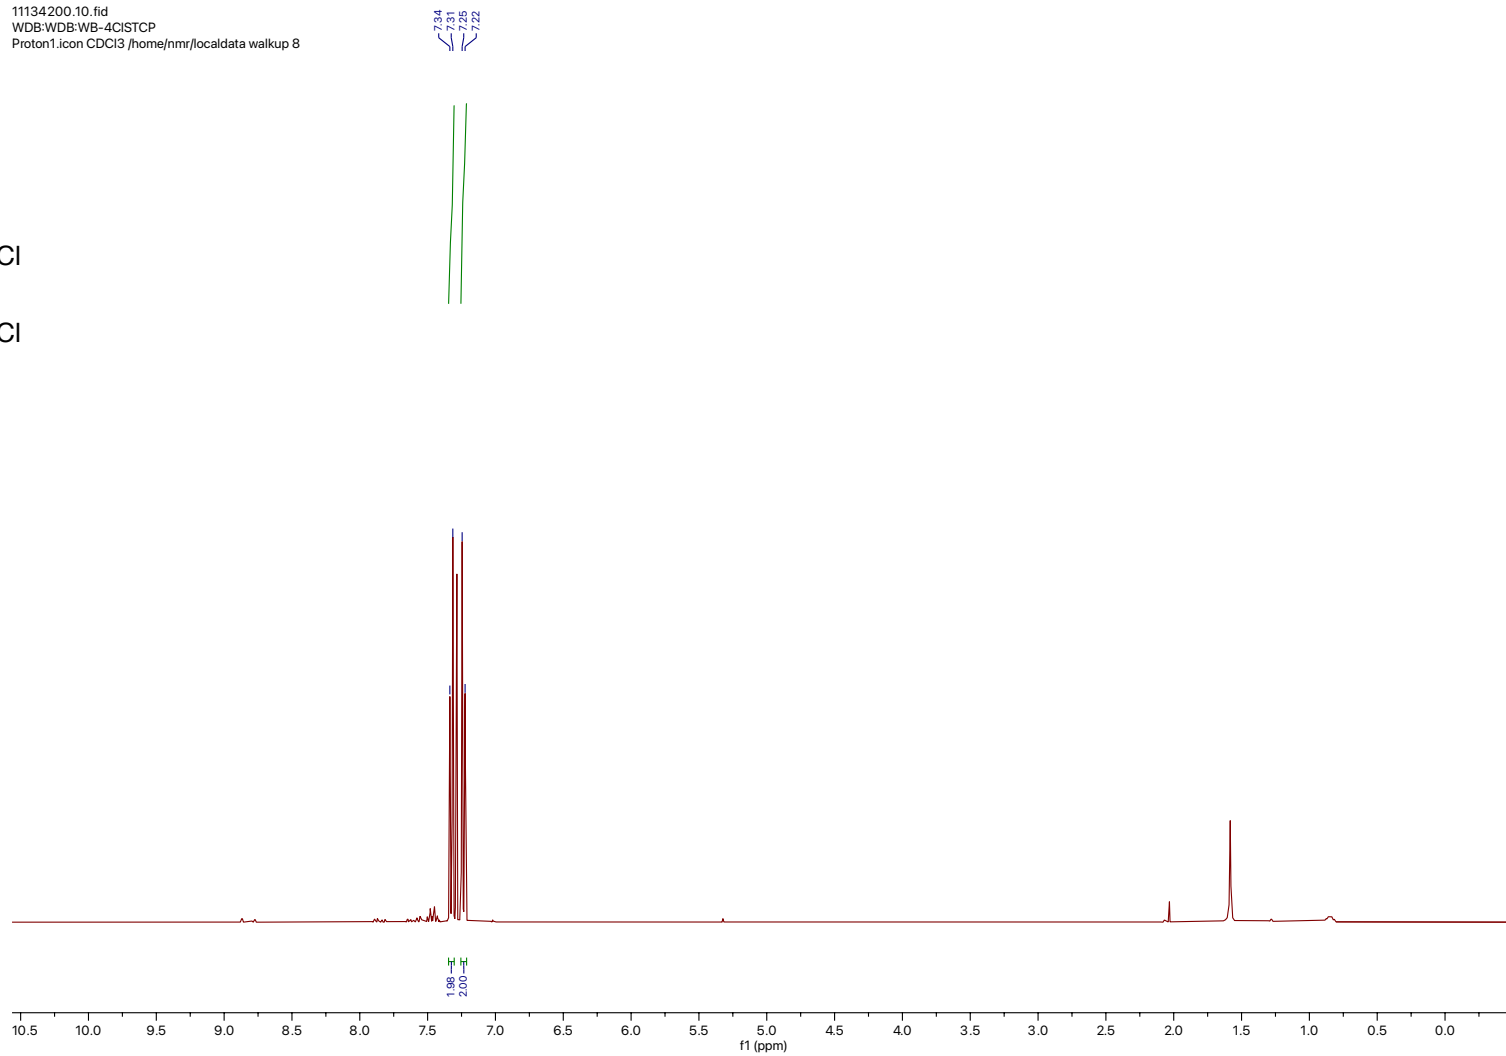

**Figure S52.**  $^1\text{H}$  NMR spectrum of **20** recorded at 400 MHz in  $\text{CDCl}_3$ .

11134200.11.fid  
WDB-WDB-WB-4ClISTCP  
Carbon.dur CDCl3 /home/nmr/localdata walkup 8

147.25  
146.76  
134.62  
133.65  
130.40  
129.84

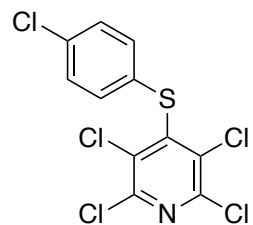

**20**

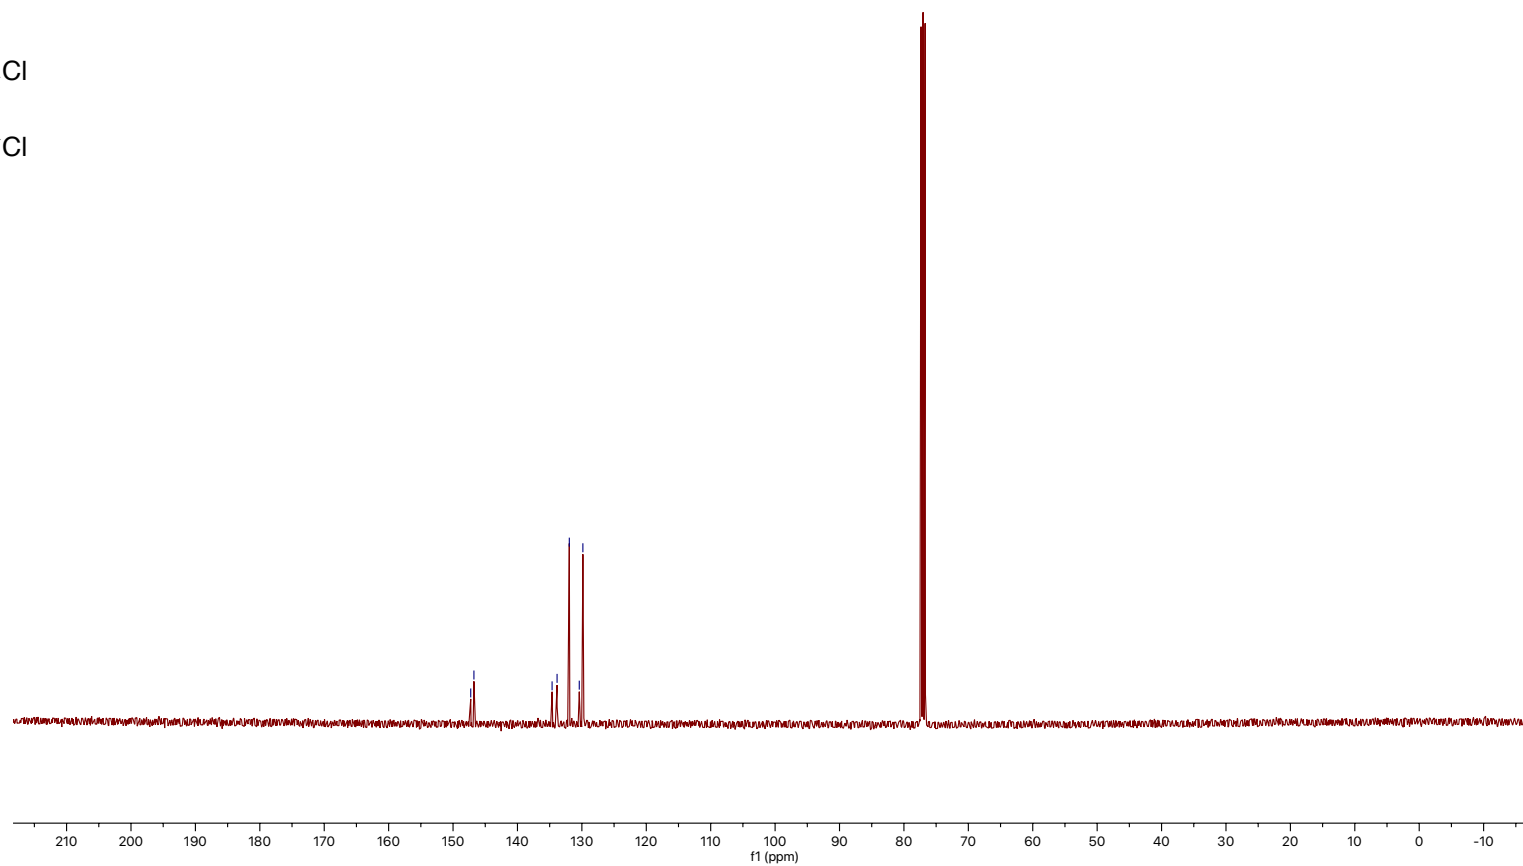

**Figure S53.**  $^{13}\text{C}\{^1\text{H}\}$  NMR spectrum of **20** recorded at 101 MHz in  $\text{CDCl}_3$ .

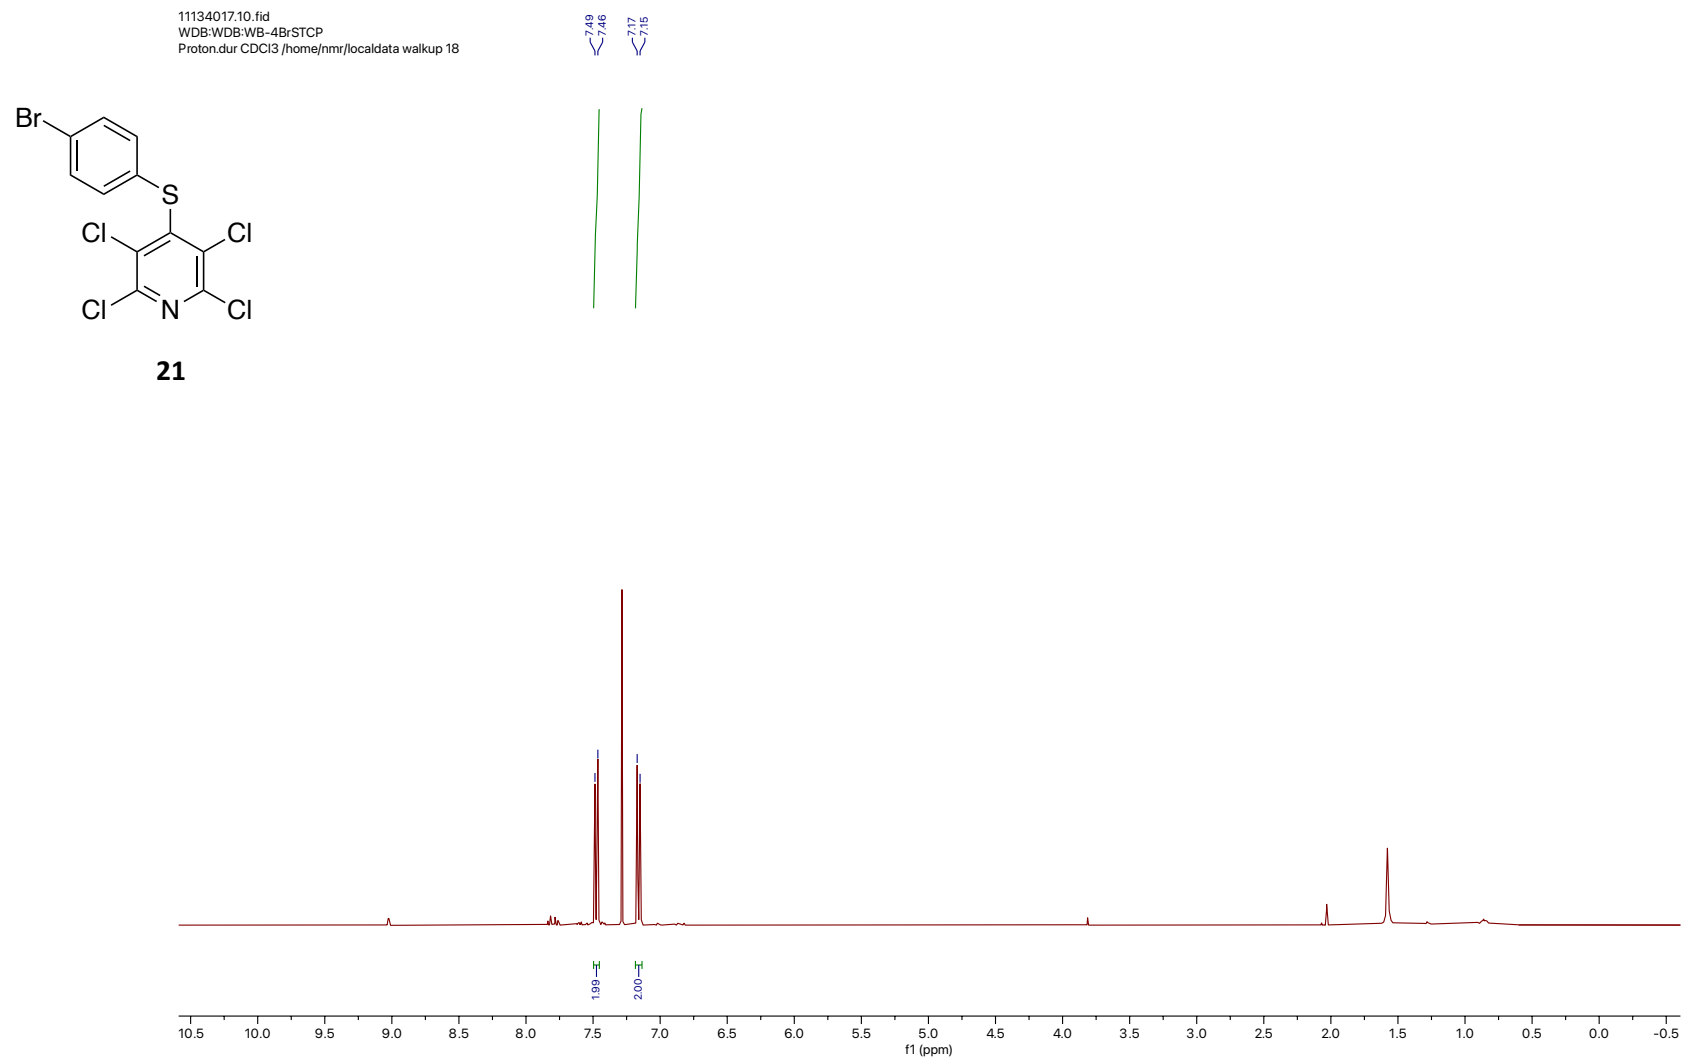

**Figure S54.**  $^1\text{H}$  NMR spectrum of **21** recorded at 400MHz in  $\text{CDCl}_3$ .

11134017.11.fid  
WDB:WDB:WB-4BrSTCP  
Carbon.dur CDCl3 /home/nmr/localdata/walkup/18

147.09  
146.77  
133.89  
132.04  
132.04  
131.11  
122.58

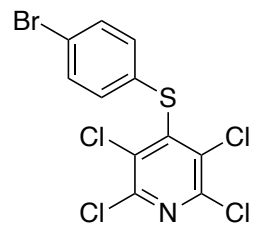

**21**

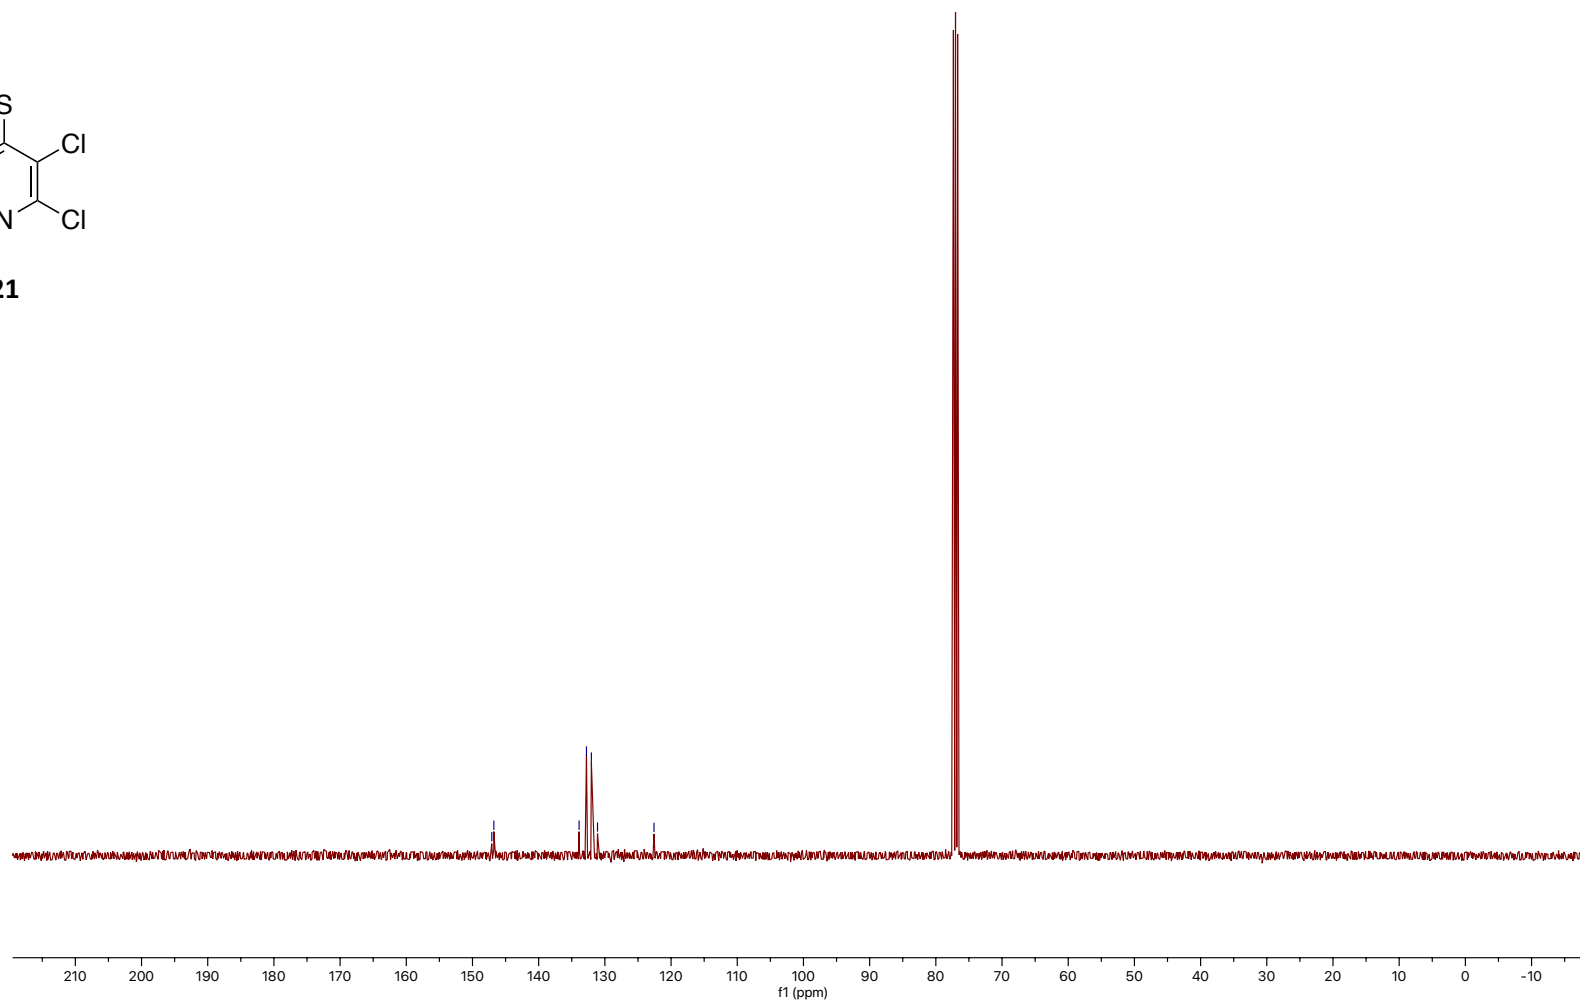

Figure S55.  $^{13}\text{C}\{^1\text{H}\}$  NMR spectrum of **21** recorded at 101 MHz in  $\text{CDCl}_3$ .

04103423.10.fid  
WDB:WDB:WB-4OMeSTCP  
Proton.dur CDCl3 /home/nmr/localdata/walkup 7

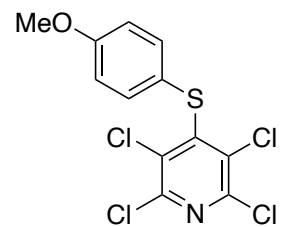

**22**

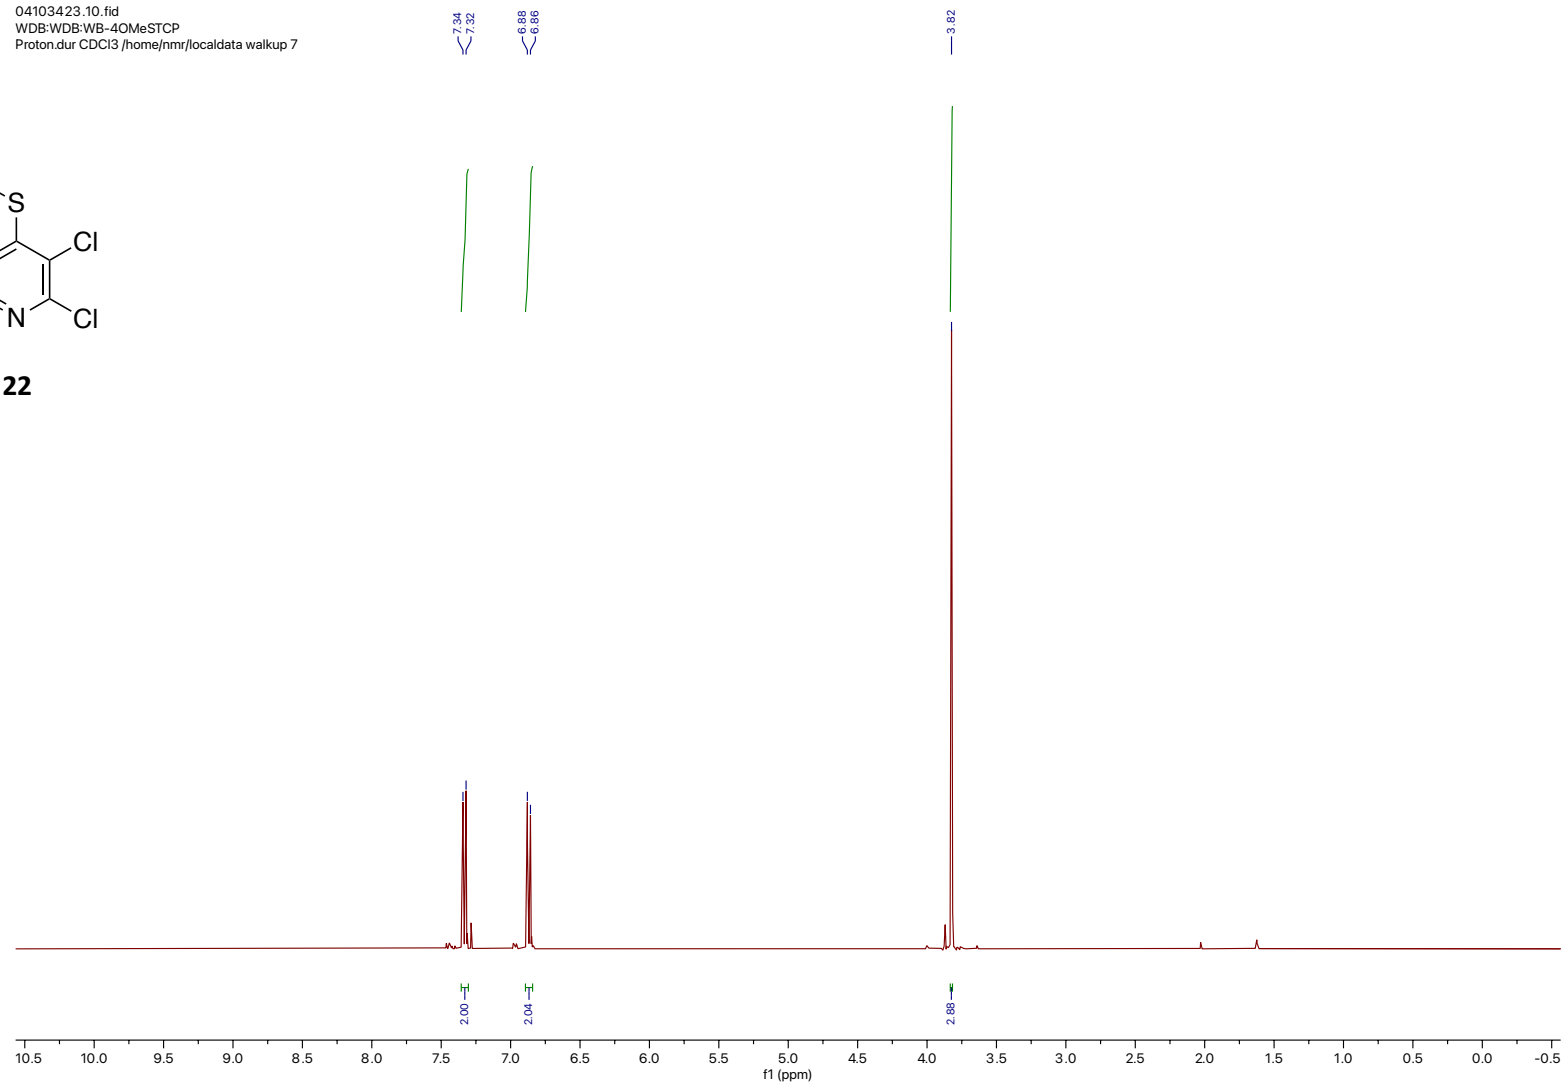

**Figure S56.**  $^1\text{H}$  NMR spectrum of **22** recorded at 400 MHz in  $\text{CDCl}_3$ .

04103423.11.fid  
WDB:WDB:WB-4OMeSTCP  
Carbon.dur CDCl3 /home/nmr/localdata walkup 7

160.28

148.94  
146.51

134.05  
133.28

121.95

115.15

55.43

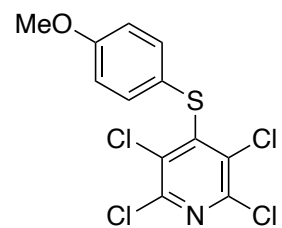

**22**

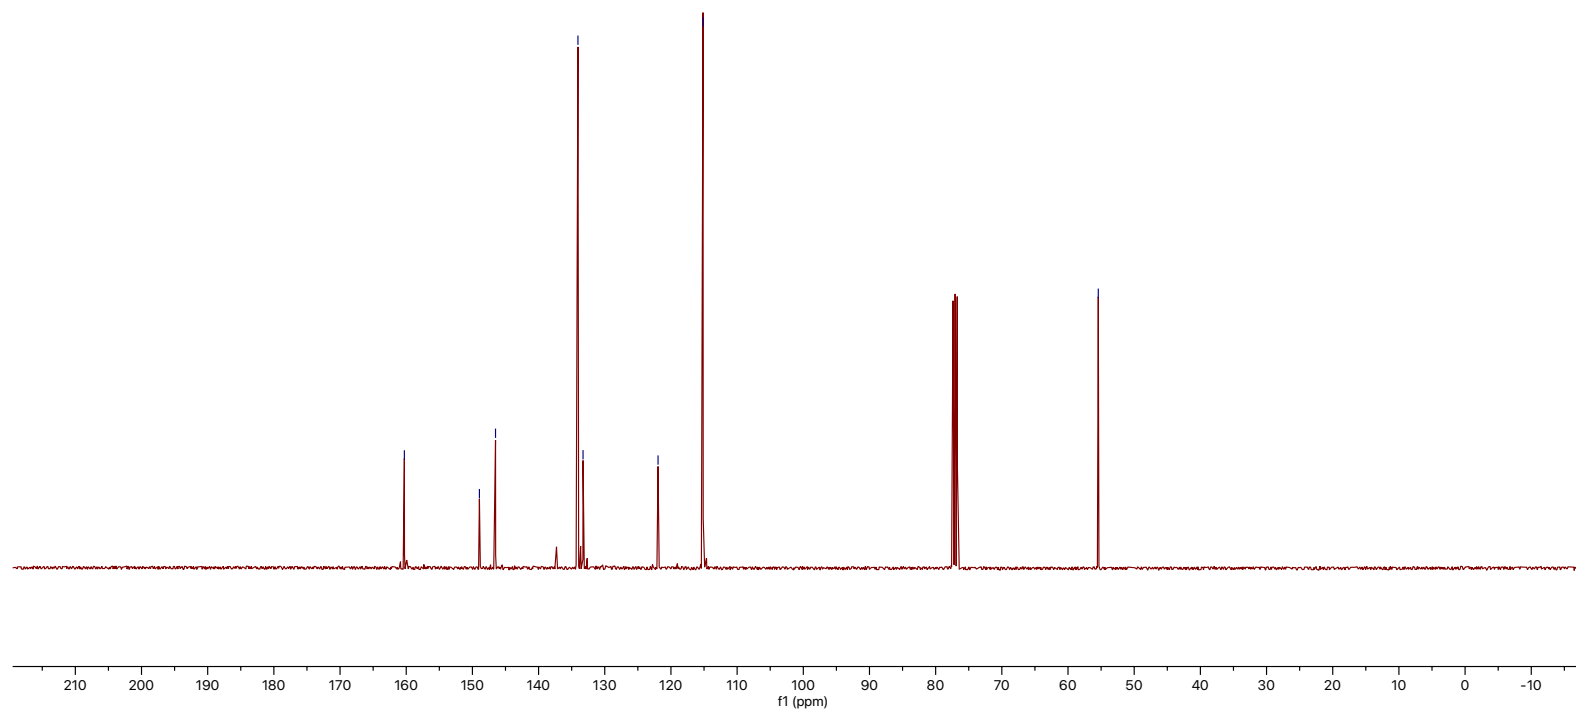

Figure S57.  $^{13}\text{C}\{^1\text{H}\}$  NMR spectrum of **22** recorded at 101 MHz in  $\text{CDCl}_3$ .

02180657.10.fid  
WDB:WDB:WB-TFP-7  
Proton.dur CDCl3 /home/nmr/localdata walkup 57

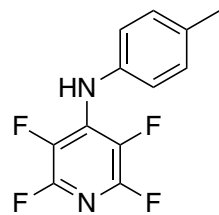

**23**

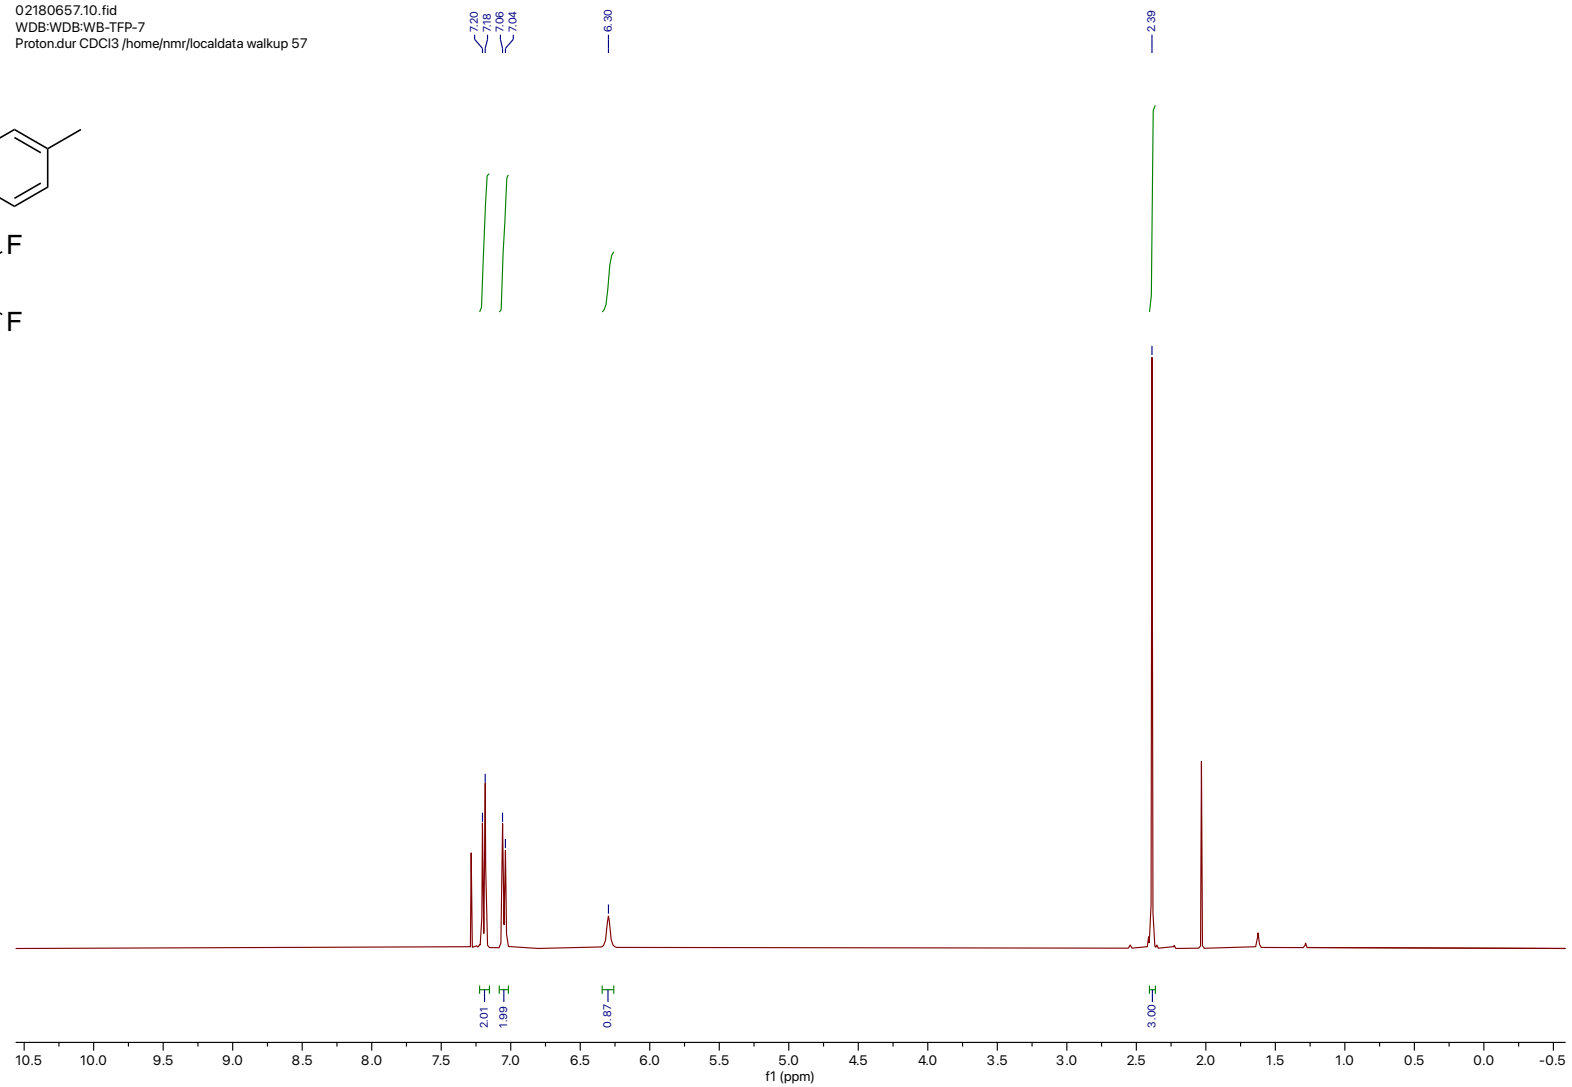

Figure S58.  $^1\text{H}$  NMR spectrum of **23** recorded at 400 MHz in  $\text{CDCl}_3$ .

02180657.13.fid  
WDB:WDB:WB-TFP-7  
F19\_limits\_dec.dur CDCl3 /home/nmr/local/data/wdb/02180657

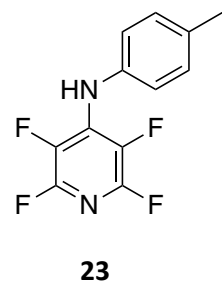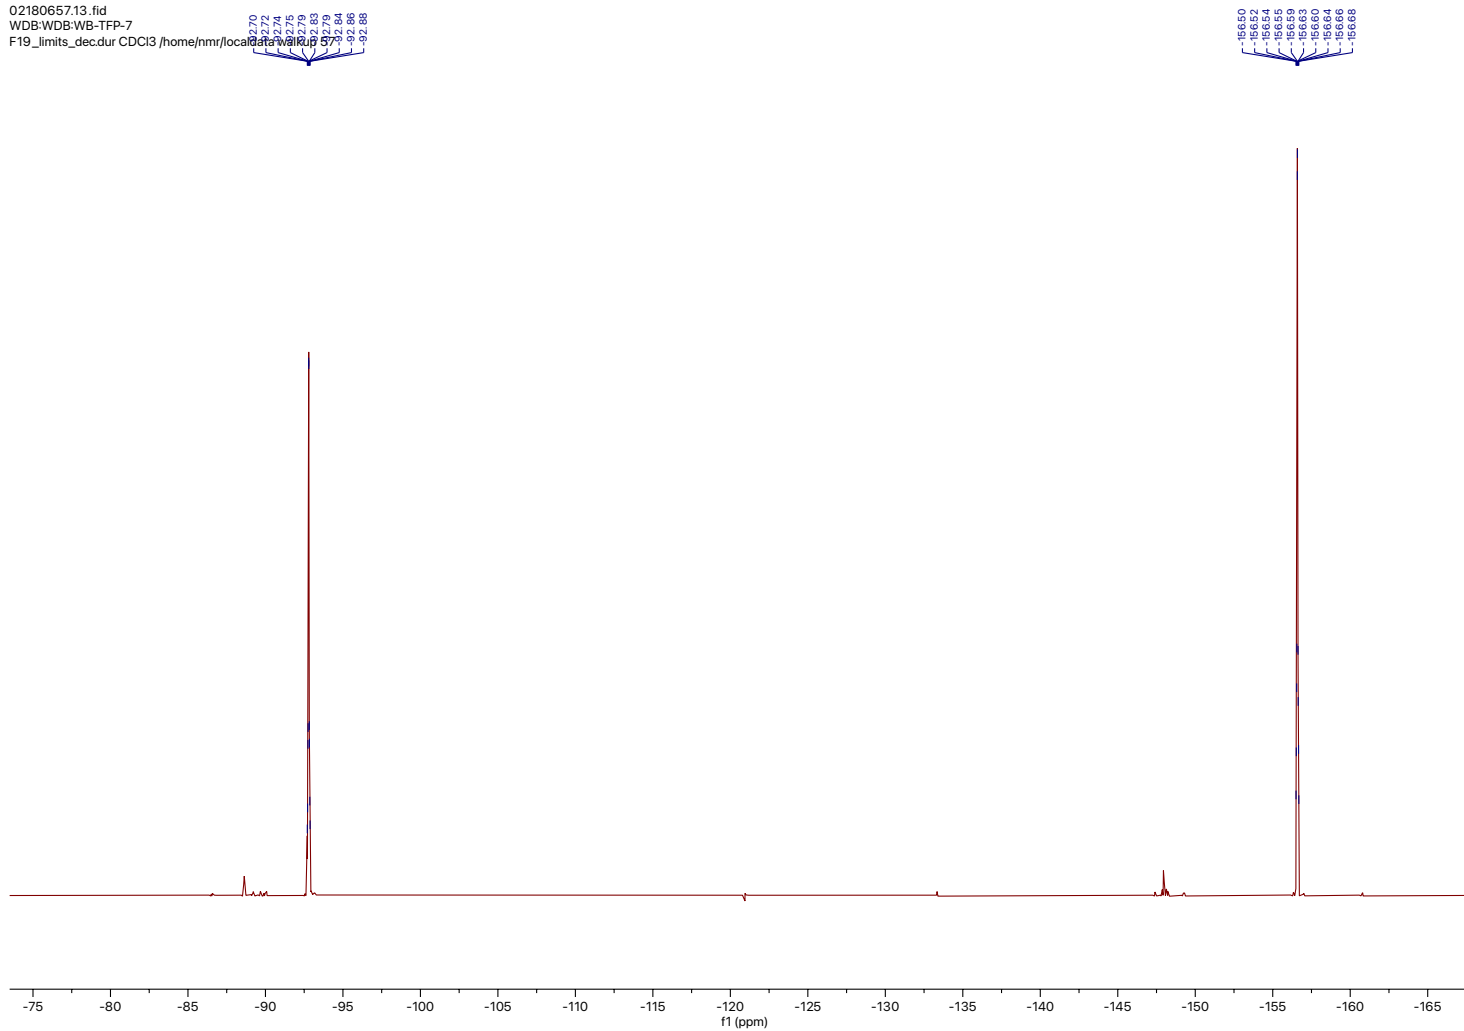

Figure S59.  $^{19}\text{F}\{^1\text{H}\}$  NMR spectrum of **23** recorded at 376 MHz in  $\text{CDCl}_3$ .

02180657.14.fid  
WDB:WDB:WB-TFP-7  
Carbon.dur CDCl3 /home/nmr/localdata/walkup/5

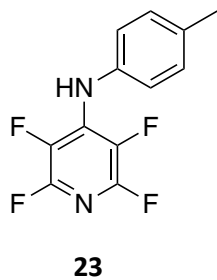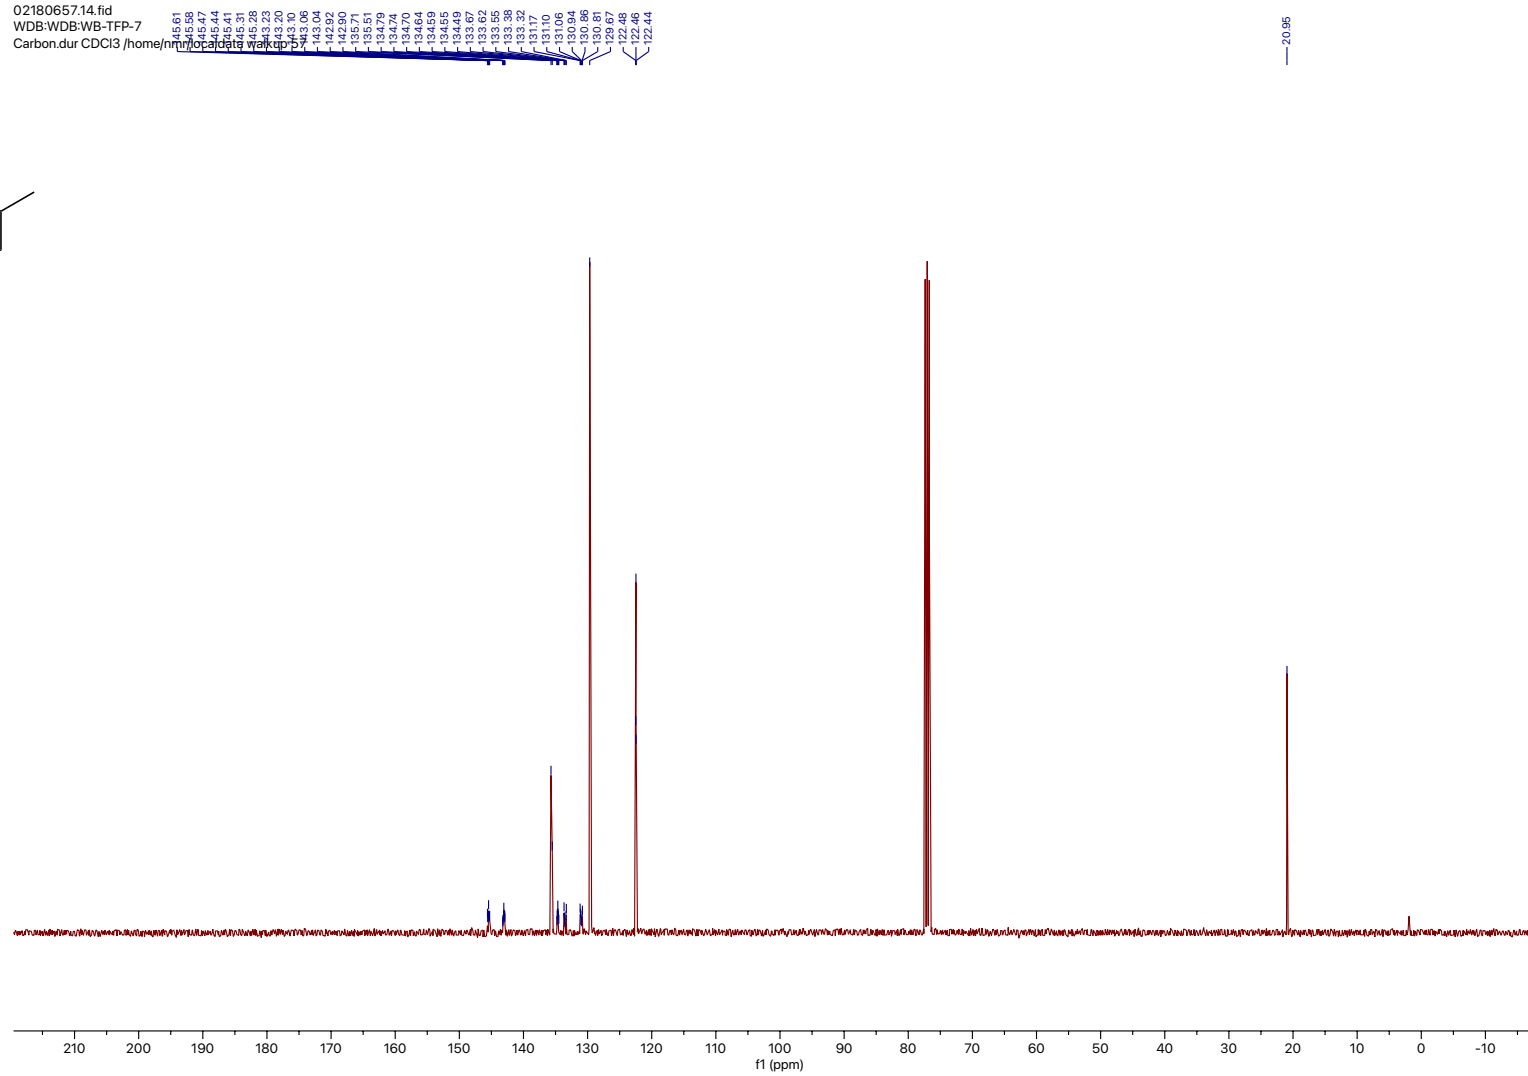

Figure S60.  $^{13}\text{C}\{^1\text{H}\}$  NMR spectrum of **23** recorded at 101 MHz in  $\text{CDCl}_3$ .

04103343.10.fid  
WDB:WDB:WB-4MeNHTCP  
Proton.dur CDCl3 /home/nmr/localdata walkup 6

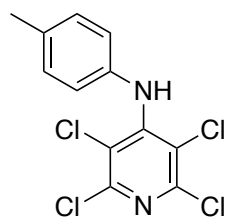

**24**

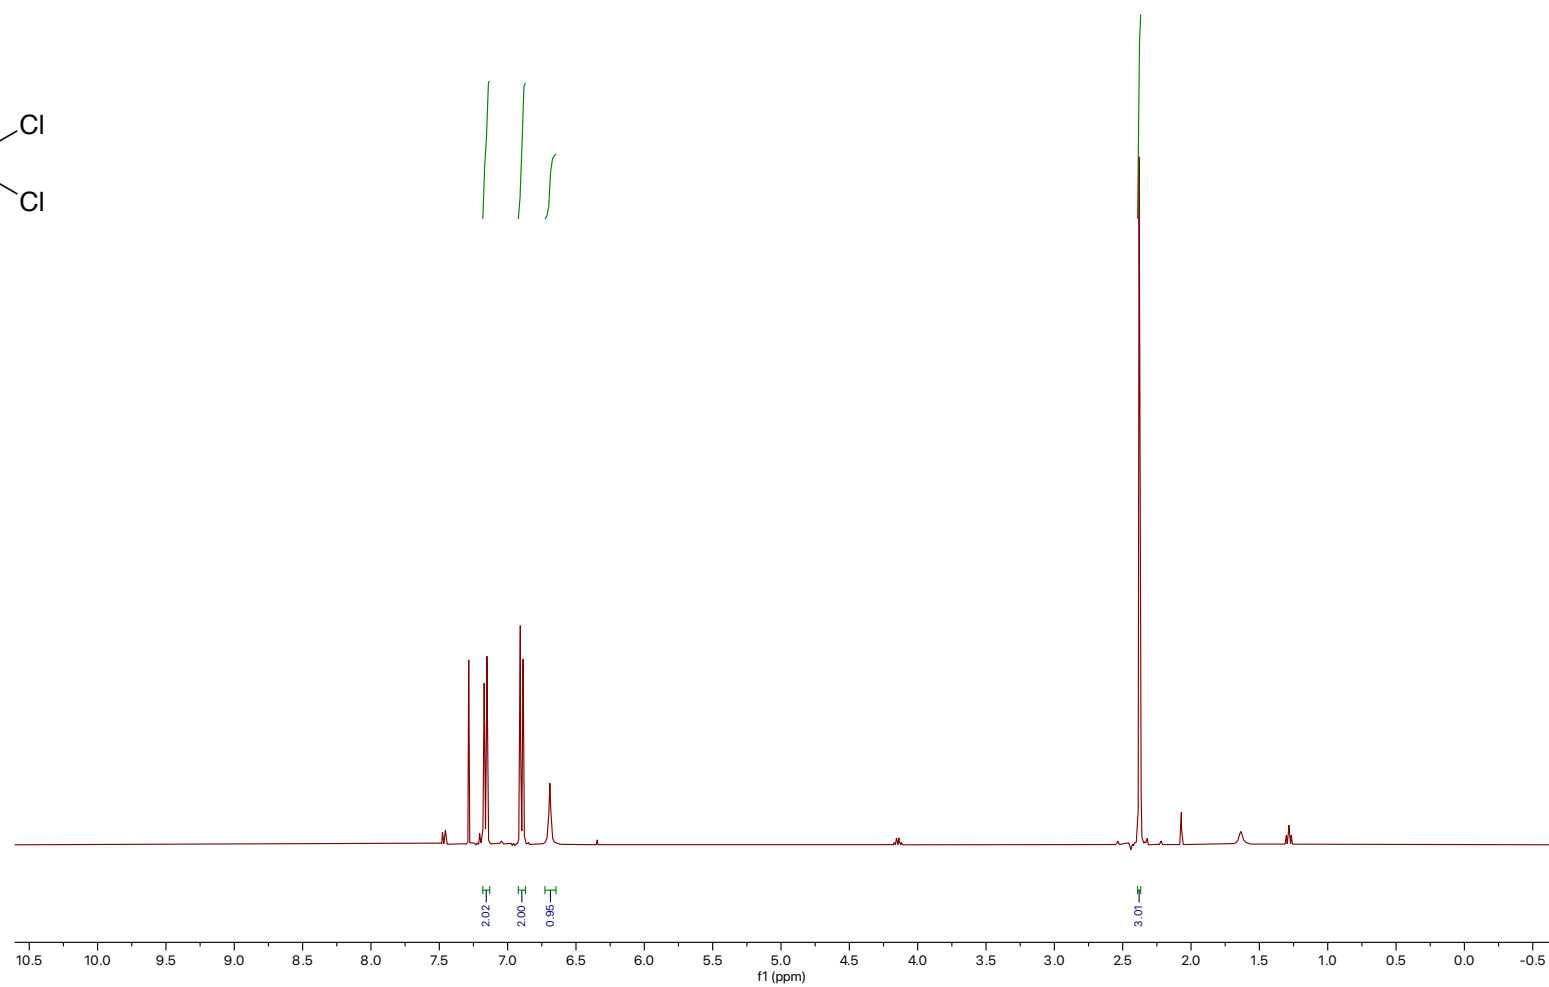

**Figure S61.** <sup>1</sup>H NMR spectrum of **24** recorded at 400 MHz in CDCl<sub>3</sub>.

04103343.11.fid  
WDB:WDB:WB-4MeNHTCP  
Carbon.dur CDCl3 /home/nmr/localdata/walkup 6

147.62  
146.66  
136.45  
135.32  
129.58  
122.64  
118.17

20.96

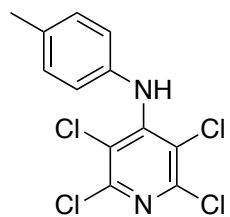

**24**

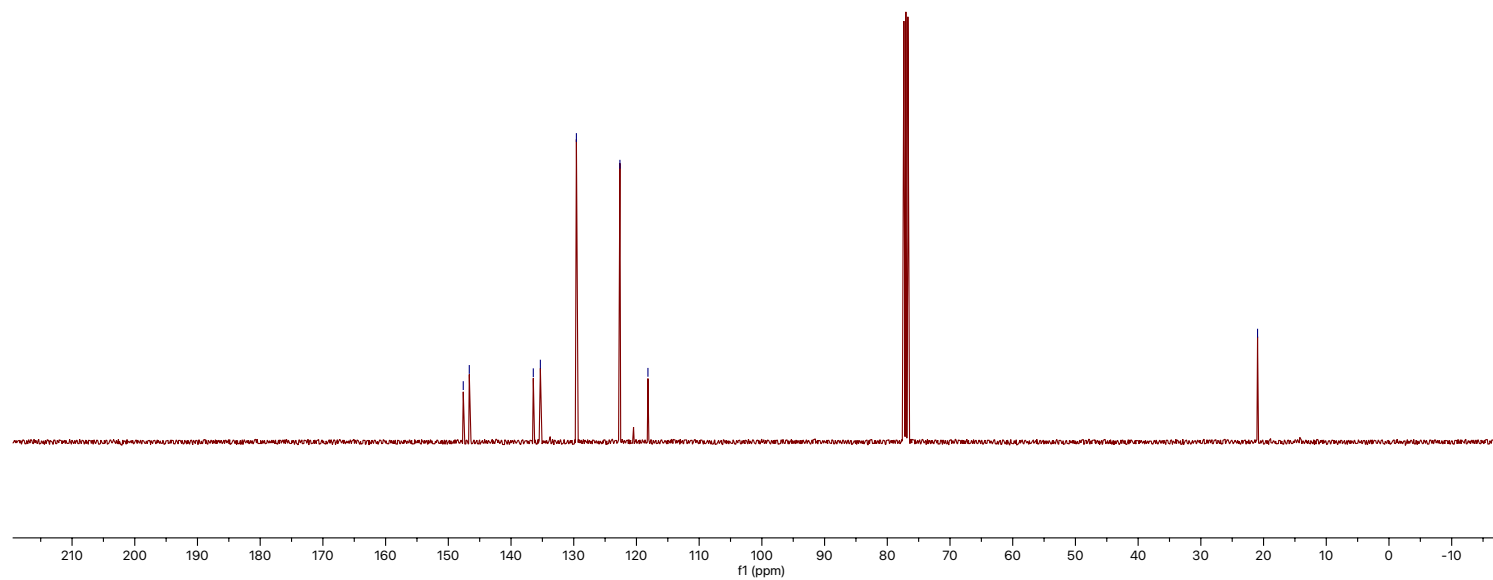

**Figure S62.**  $^{13}\text{C}\{^1\text{H}\}$  NMR spectrum of **24** recorded at 101 MHz in  $\text{CDCl}_3$ .

04093810.10.fid  
WDB:WDB:WB4Me-MeAnilineTFP  
Proton.dur CDCl3 /home/nmr/localdata walkup 3

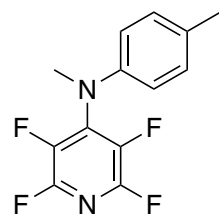

25

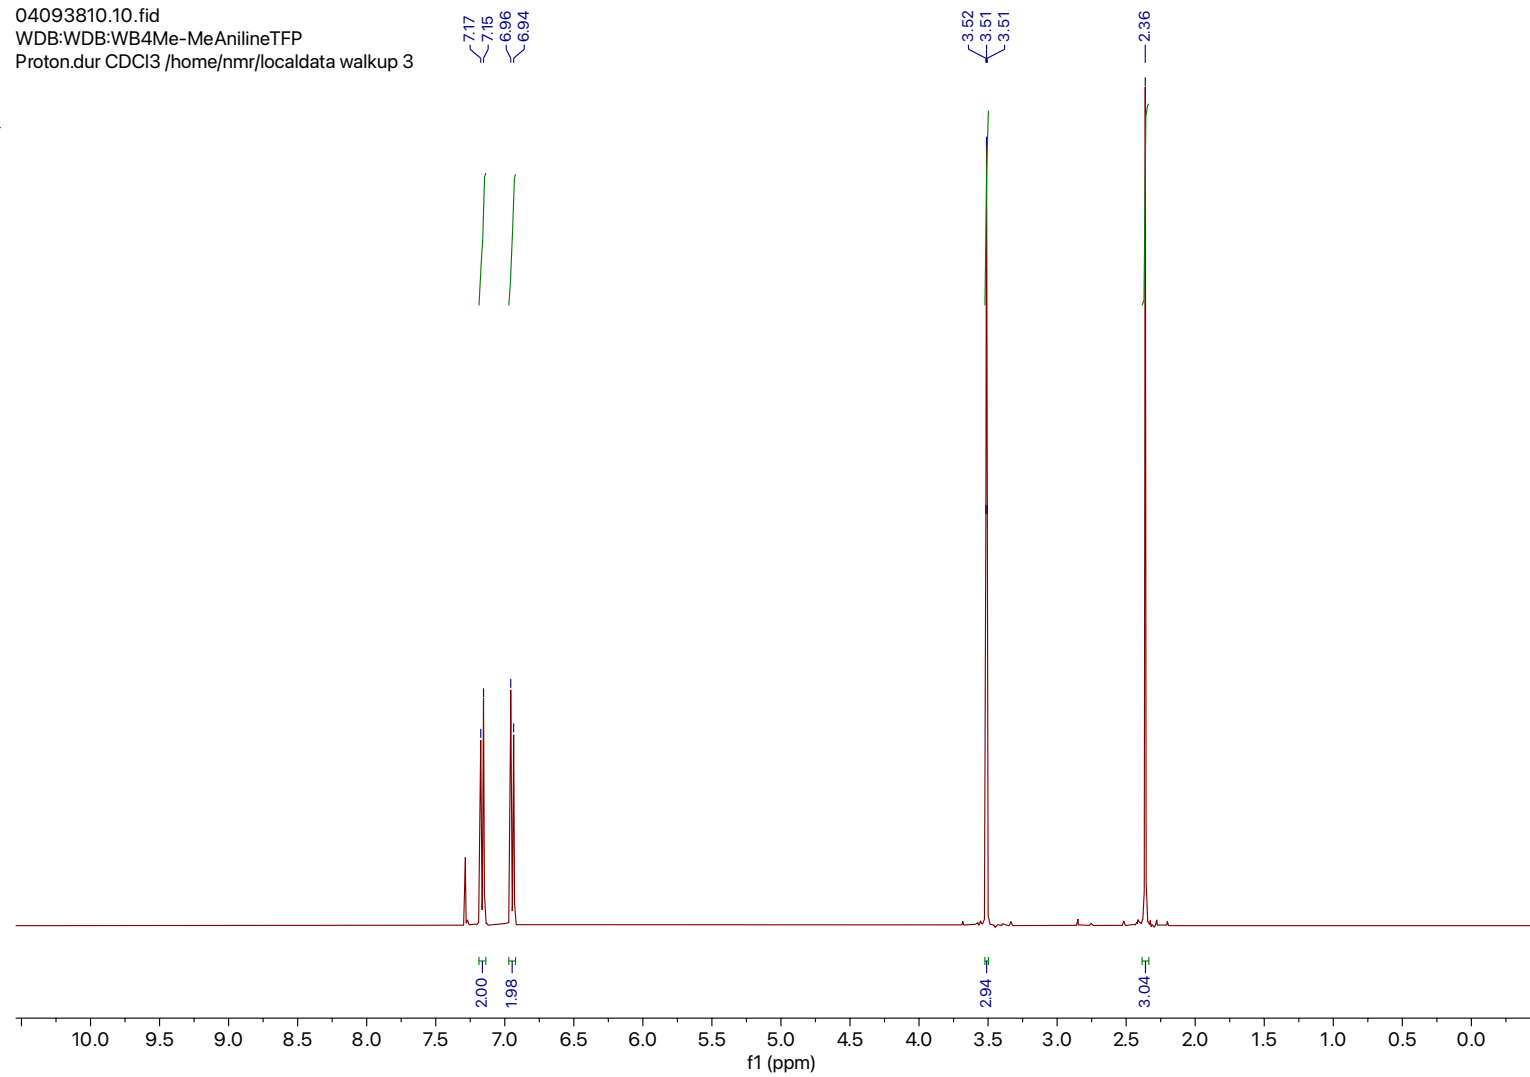

Figure S63.  $^1\text{H}$  NMR spectrum of **25** recorded at 400 MHz in  $\text{CDCl}_3$ .

04093810.13.fid  
WDB:WDB:WB4Me-MeAniline  
F19\_limits\_dec.dur CDCI3 /home/mr/local/data/walkup 3

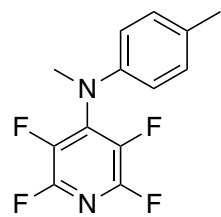

25

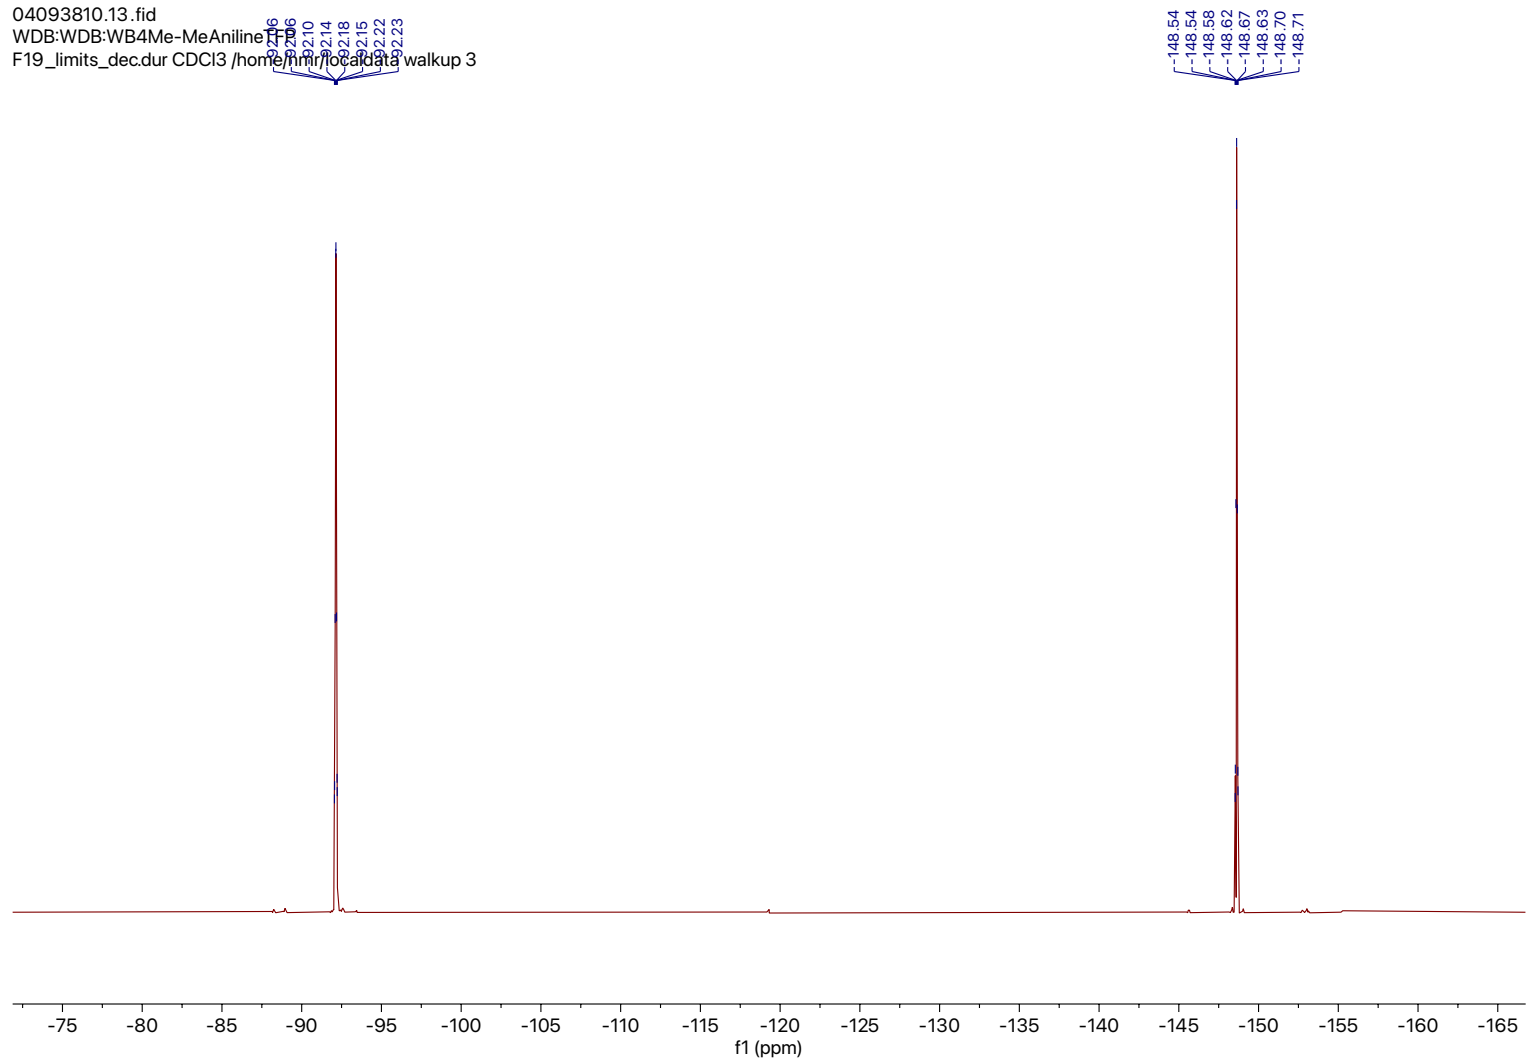

Figure S64.  $^{19}\text{F}\{^1\text{H}\}$  NMR spectrum of **25** recorded at 376 MHz in  $\text{CDCl}_3$ .

04093810.14.fid  
WDB:WDB:WB4Me-MeAnilineTFP  
Carbon.dur CDCl3 /home/nmr/localdata/walku

146.12  
146.00  
145.95  
145.94  
145.92  
145.87  
145.87  
143.68  
143.57  
143.55  
143.52  
143.52  
143.40  
143.37  
138.23  
138.16  
138.11  
138.07  
138.00  
137.96  
137.86  
135.66  
135.60  
135.55  
135.45  
135.33  
135.33  
133.43  
129.93  
119.21

40.81  
40.76  
40.72

20.71

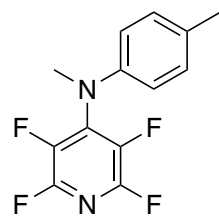

25

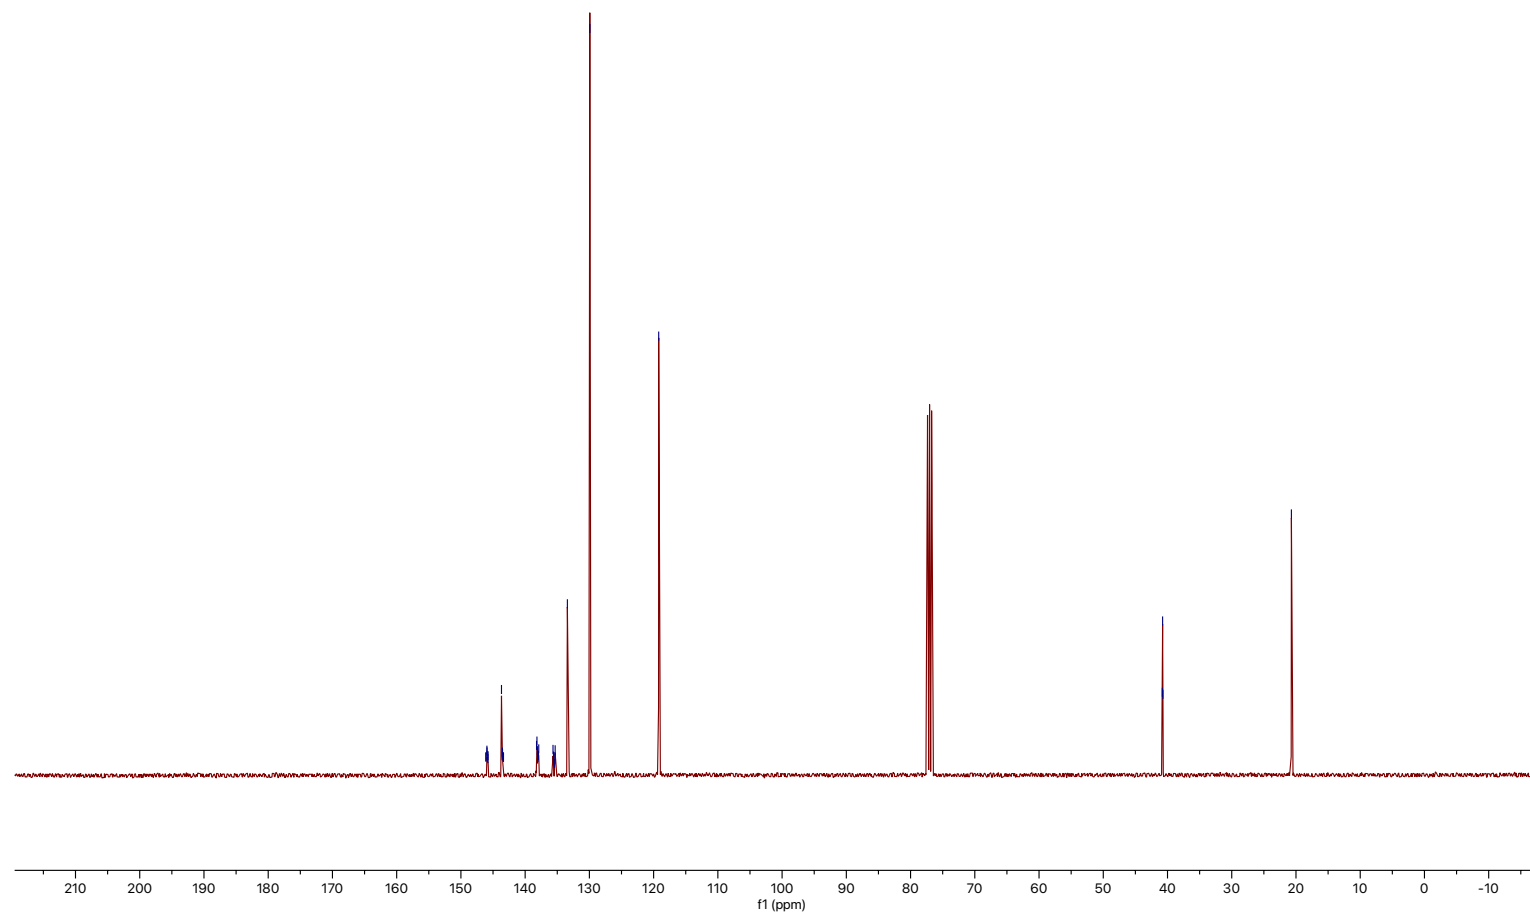

Figure S65.  $^{13}\text{C}\{^1\text{H}\}$  NMR spectrum of **25** recorded at 101 MHz in  $\text{CDCl}_3$ .

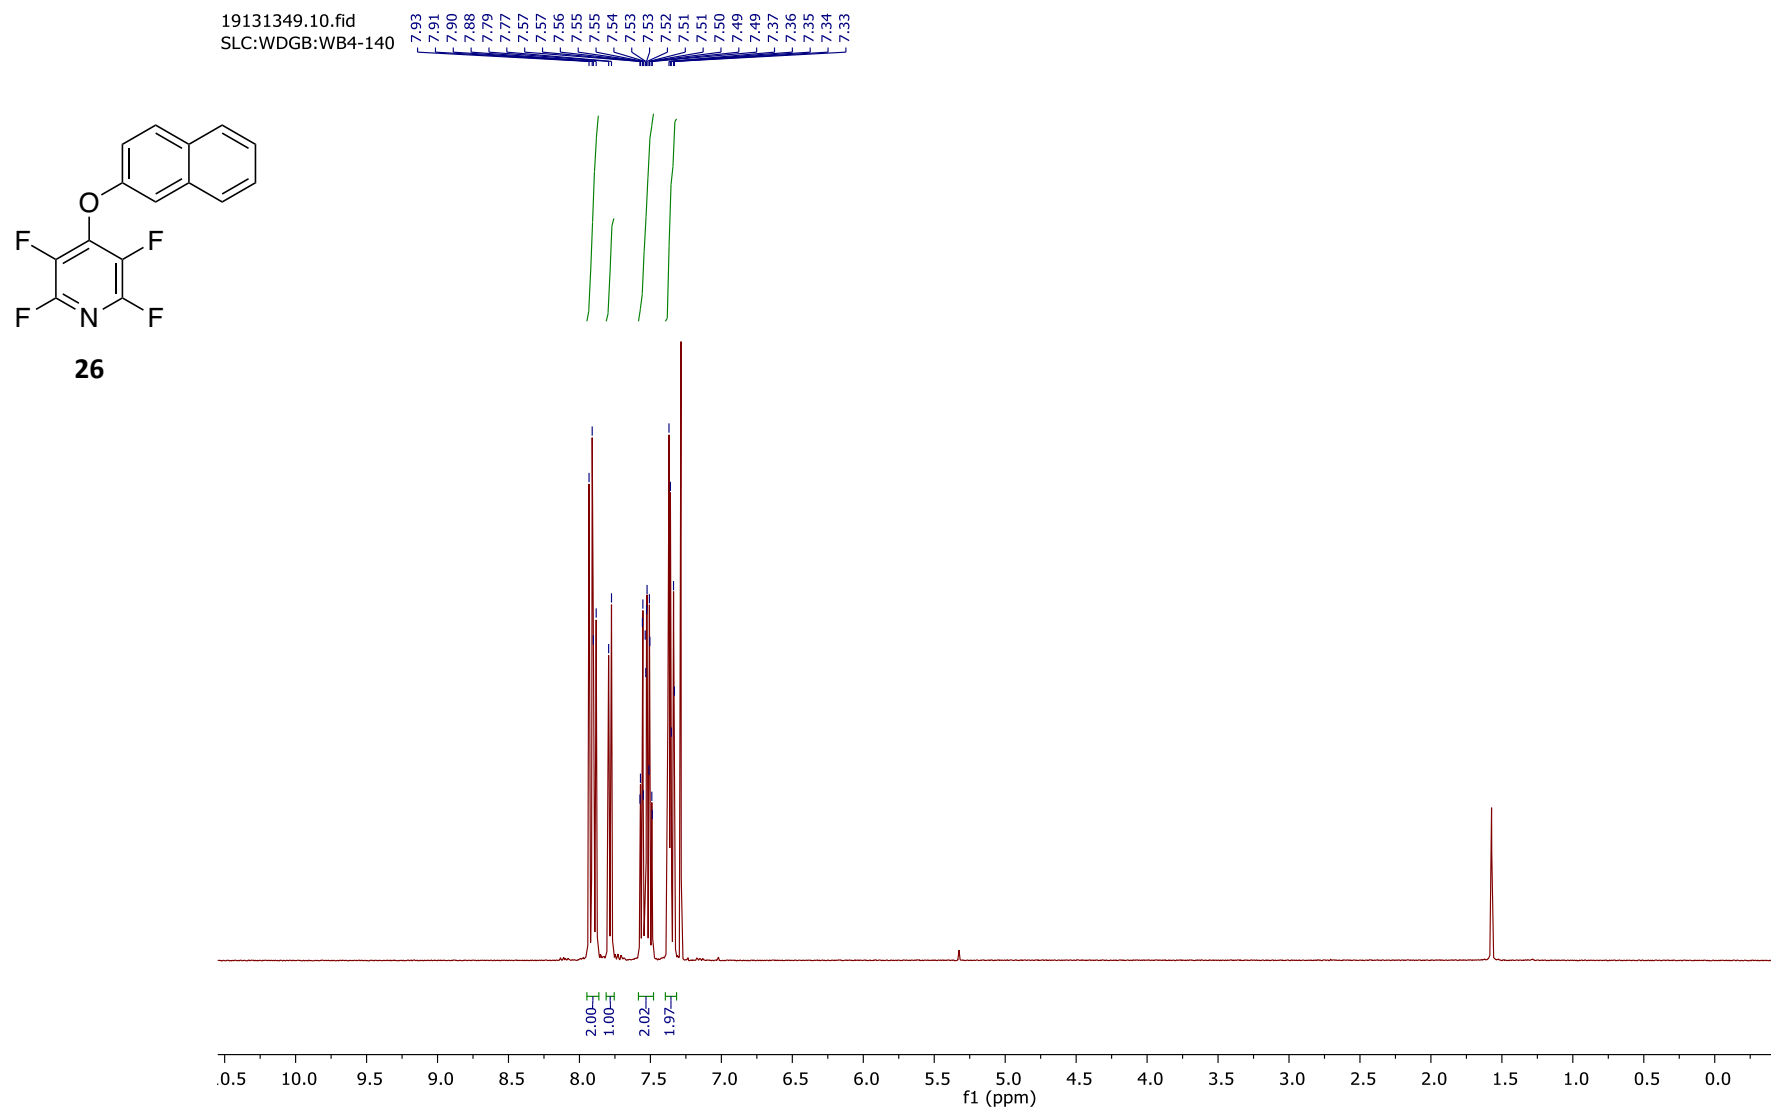

Figure S66.  $^1\text{H}$  NMR spectrum of **26** recorded at 400 MHz in  $\text{CDCl}_3$ .

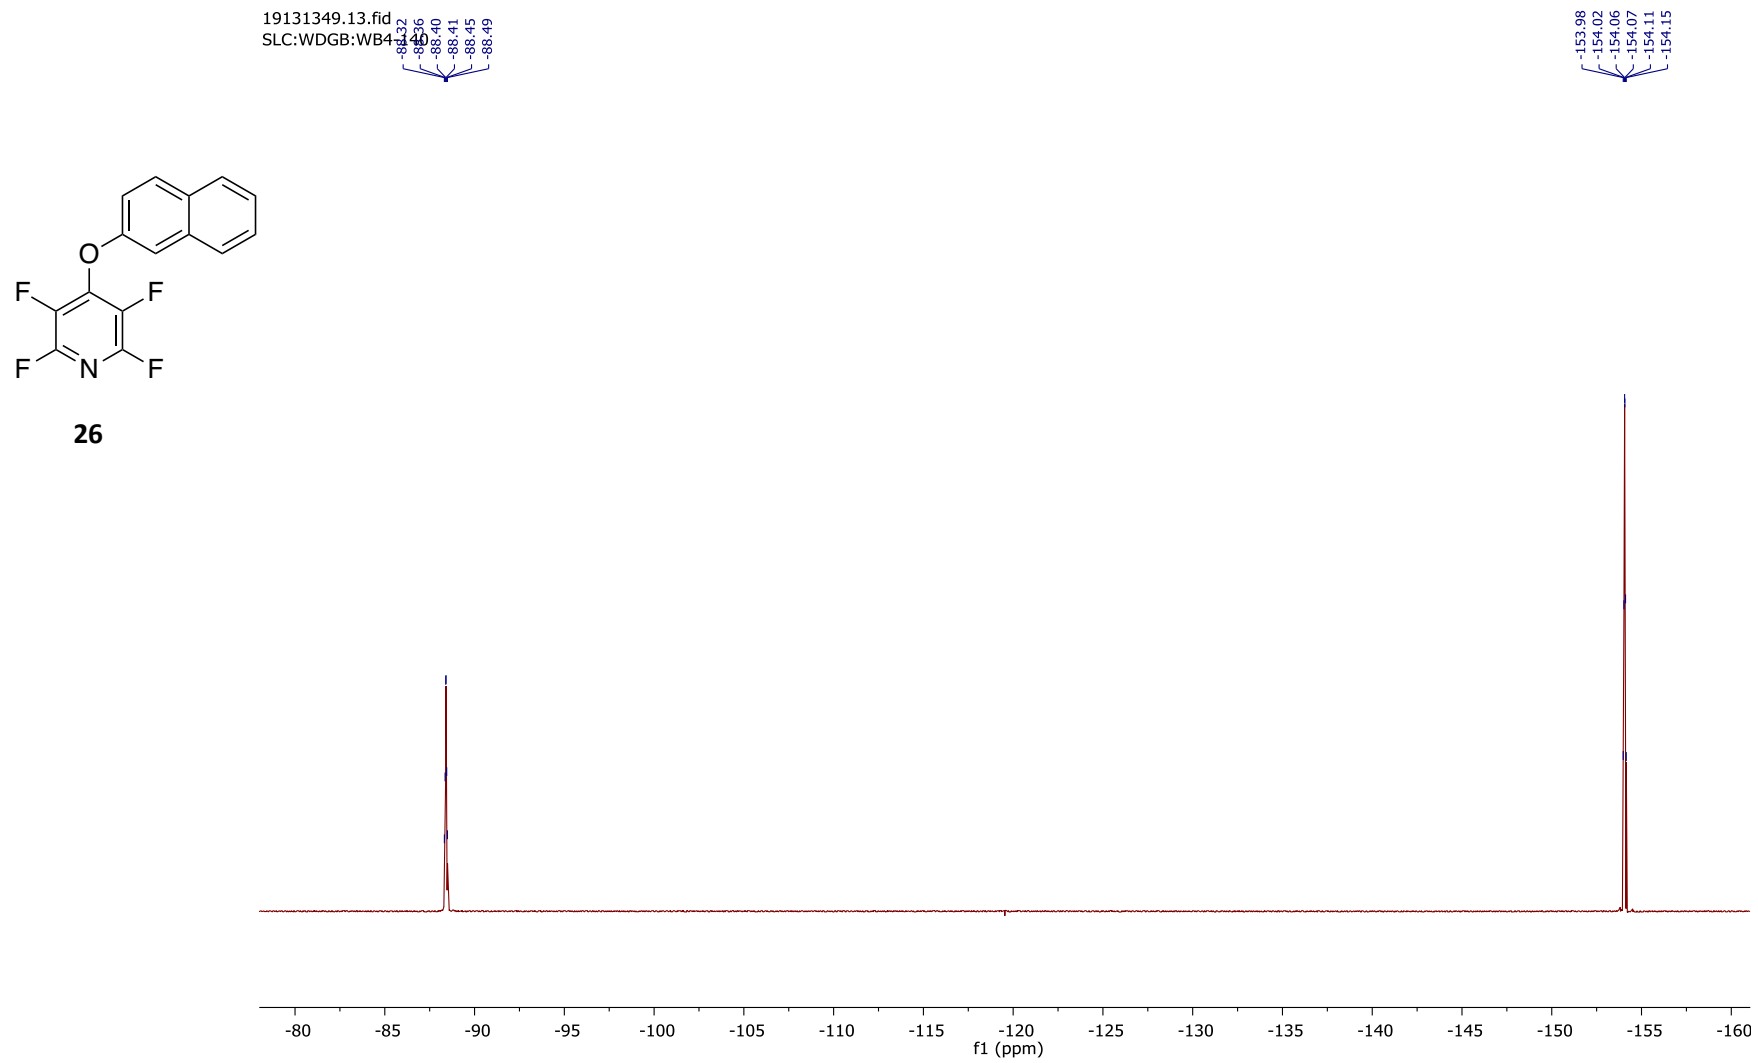

**Figure S67.**  $^{19}\text{F}\{^1\text{H}\}$  NMR spectrum of **26** recorded at 376 MHz in  $\text{CDCl}_3$ .

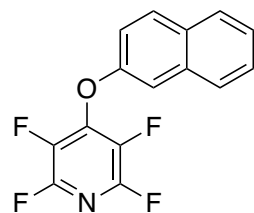

26

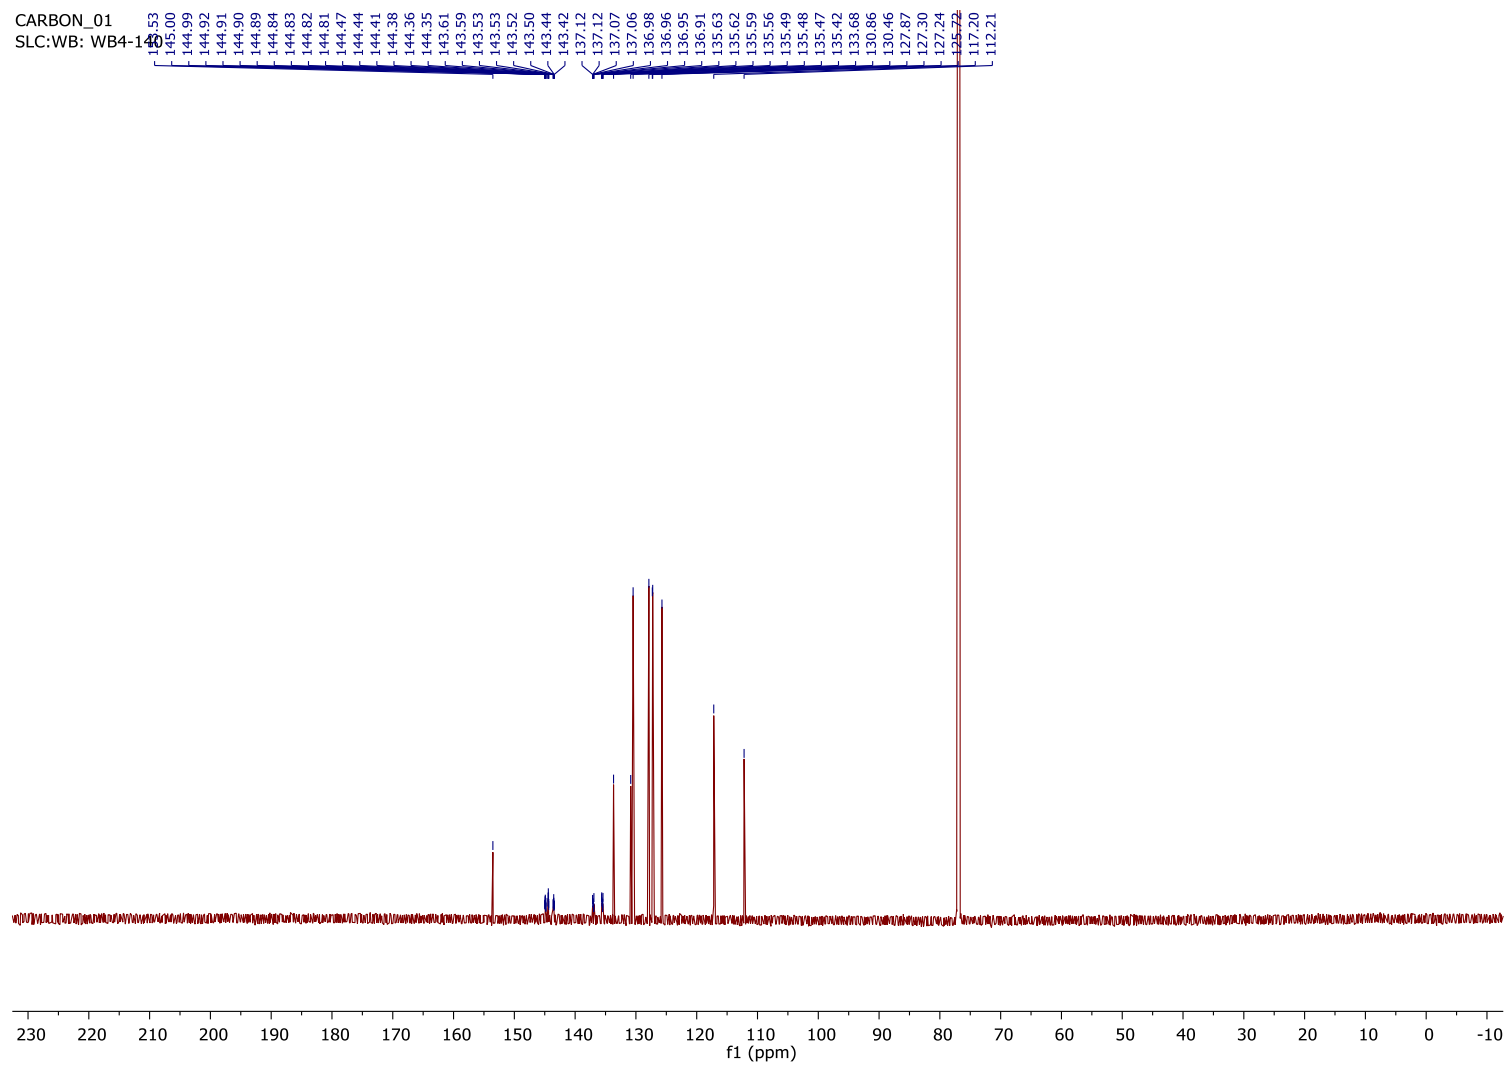

Figure S68.  $^{13}\text{C}\{^1\text{H}\}$  NMR spectrum of **26** recorded at 101 MHz in  $\text{CDCl}_3$ .

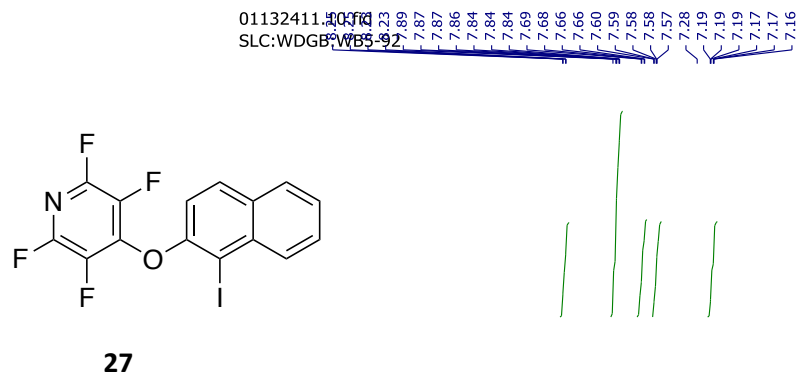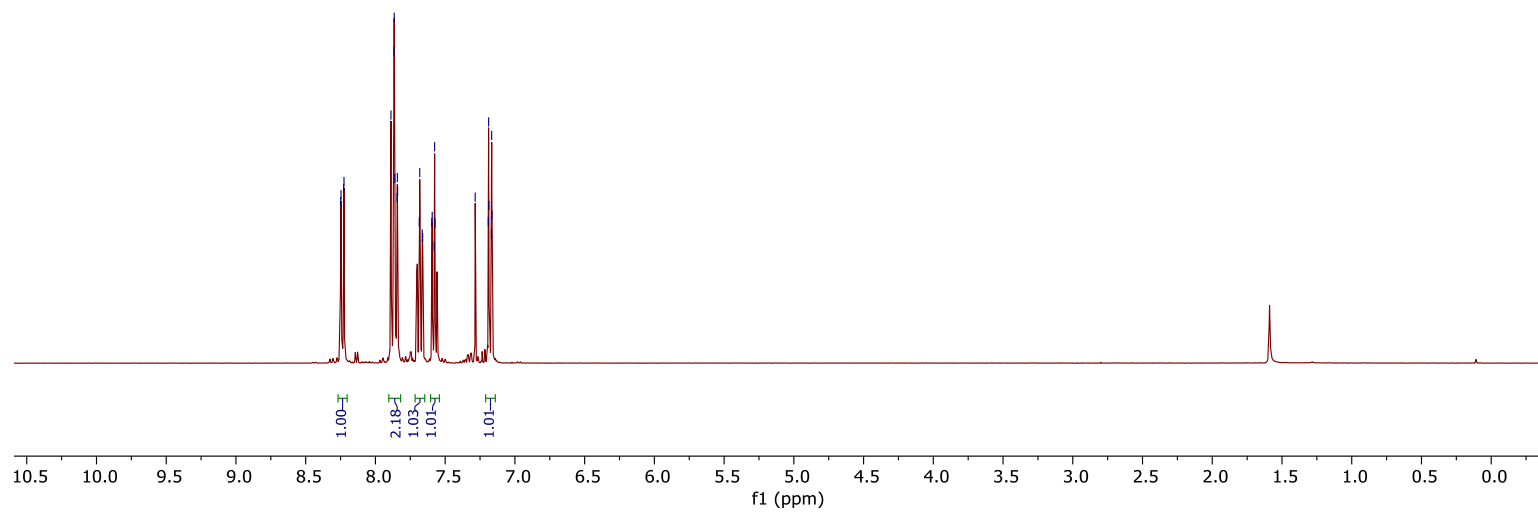

Figure S69.  $^1\text{H}$  NMR spectrum of **27** recorded at 400 MHz in  $\text{CDCl}_3$ .

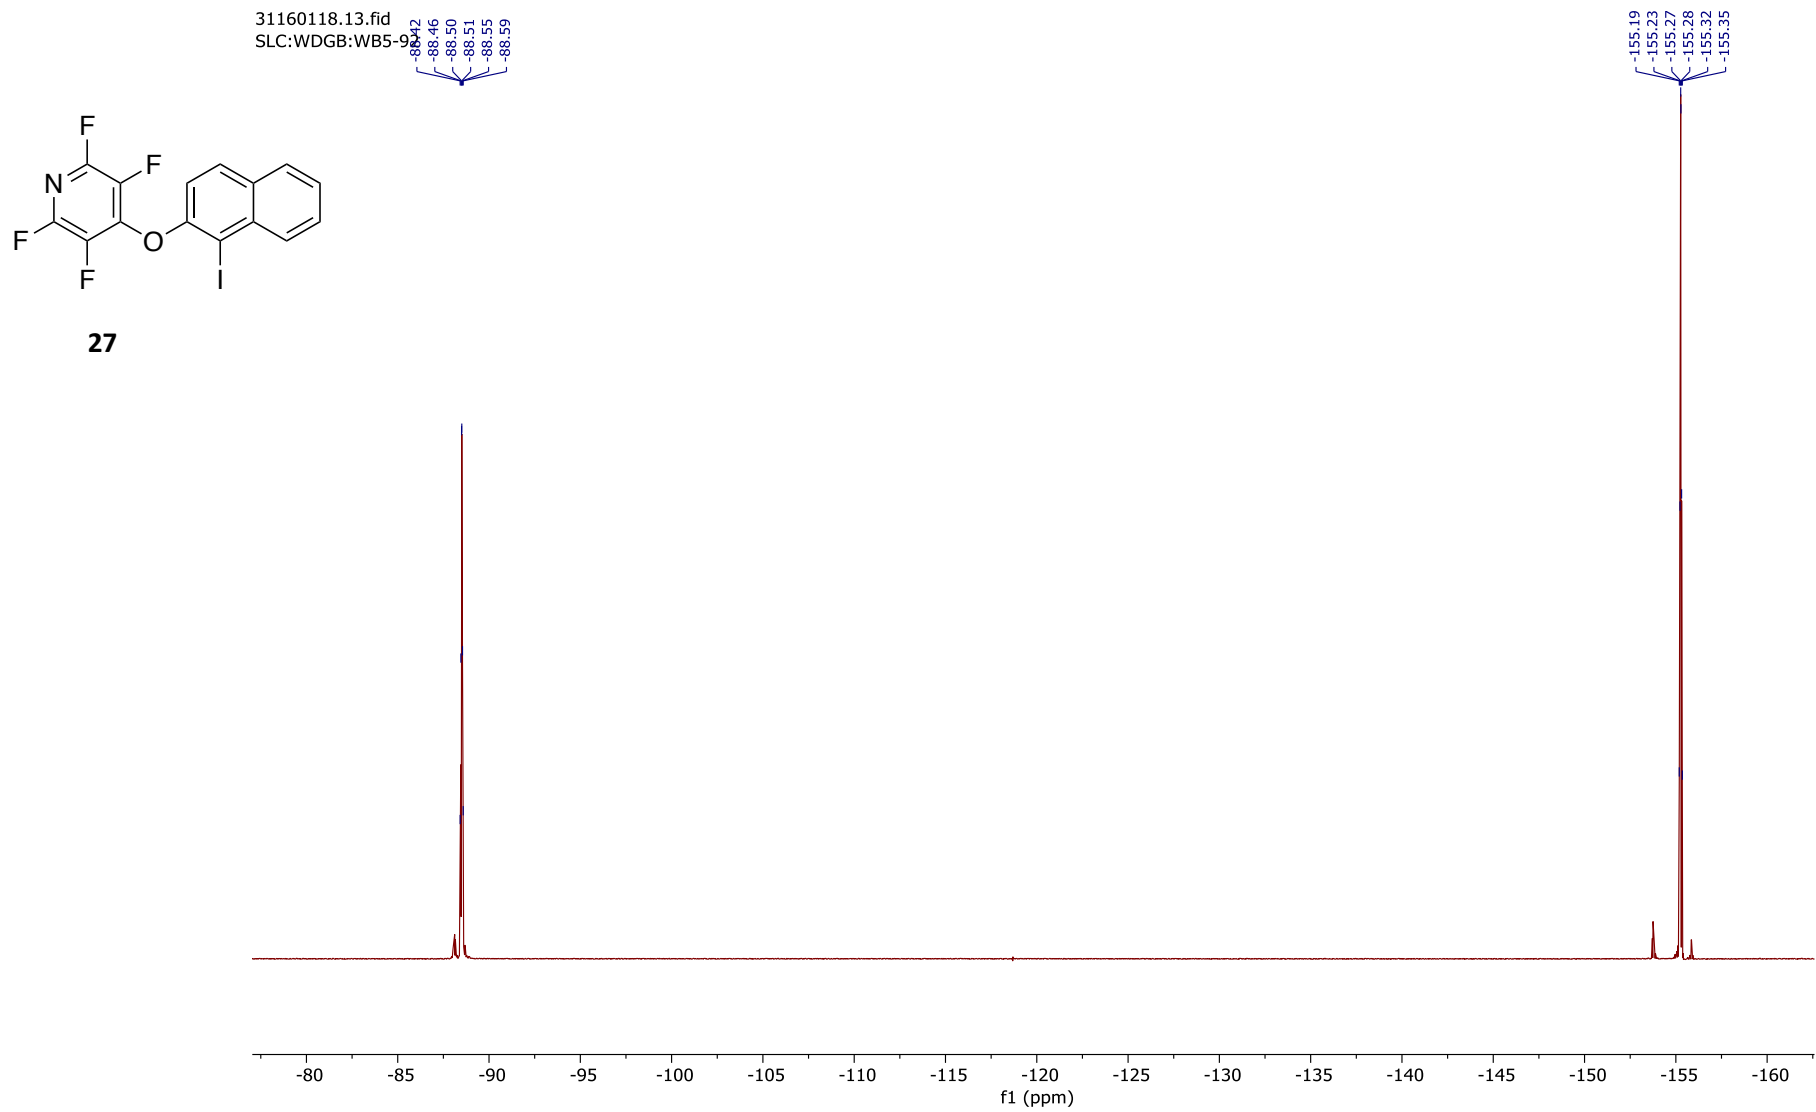

Figure S70.  $^{19}\text{F}\{^1\text{H}\}$  NMR spectrum of **27** recorded at 376 MHz in  $\text{CDCl}_3$ .

01150945.13.fid  
SLC:WB:WB5-92

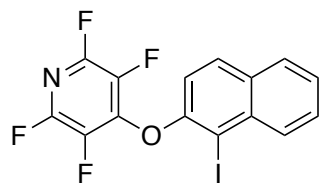

27

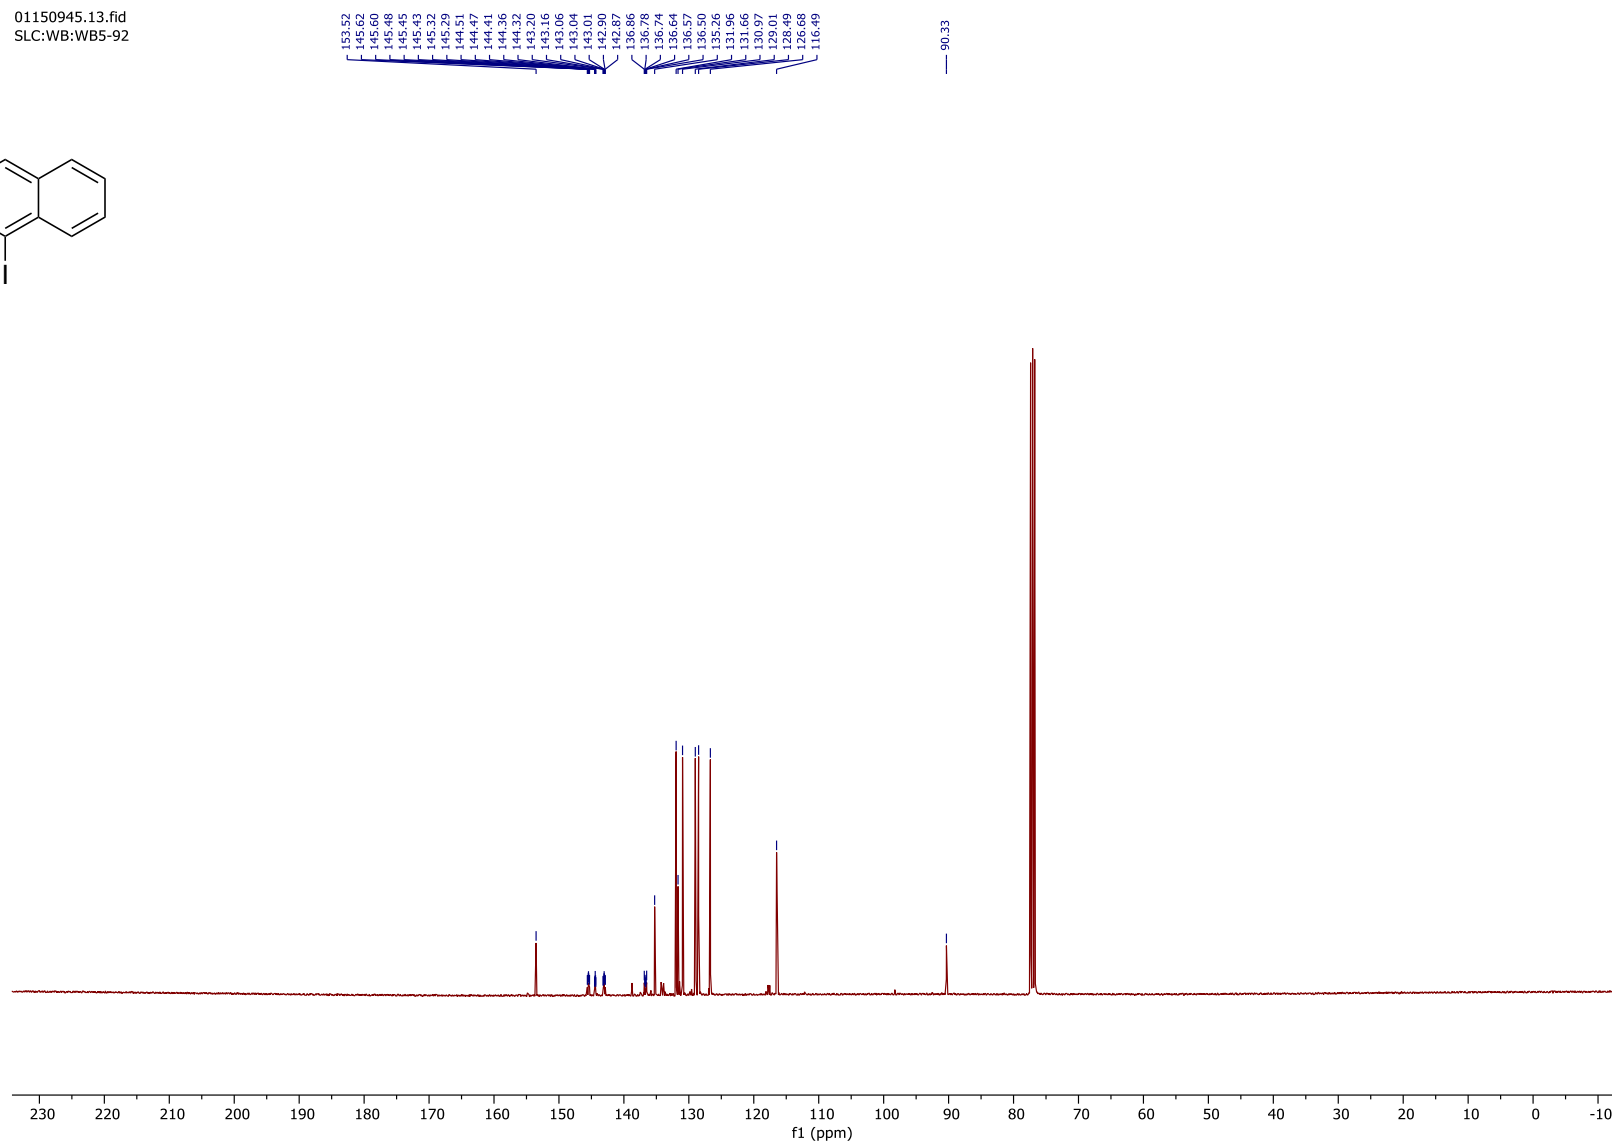

Figure S71.  $^{13}\text{C}\{^1\text{H}\}$  NMR spectrum of **27** recorded at 101 MHz in  $\text{CDCl}_3$ .

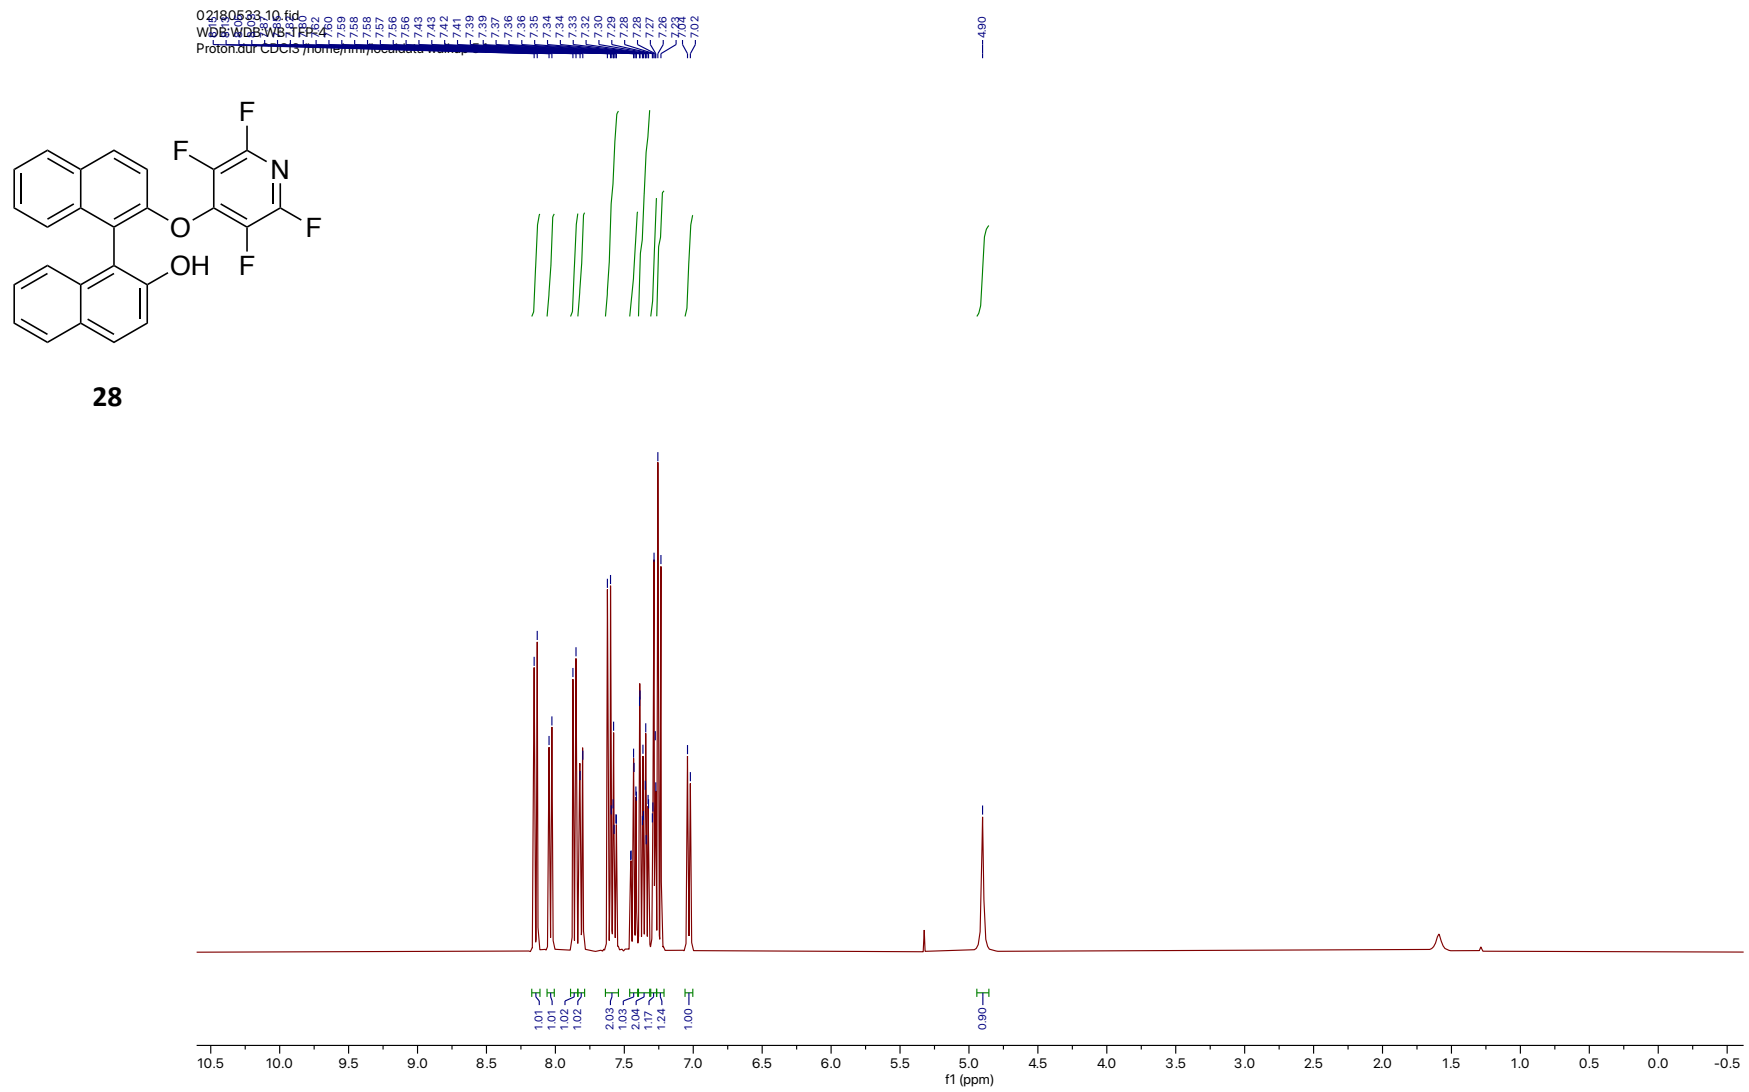

Figure S72. <sup>1</sup>H NMR spectrum of **28** recorded at 400 MHz in CDCl<sub>3</sub>.

02180533.13.fid  
WDB:WDB:WB-TFP-4  
F19\_limits\_dec.dur CDCI3 /home/nmr/localdata/walkup 54

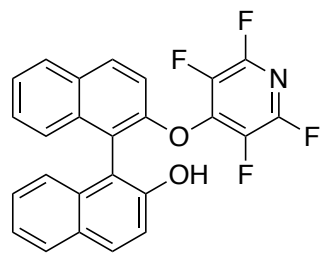

28

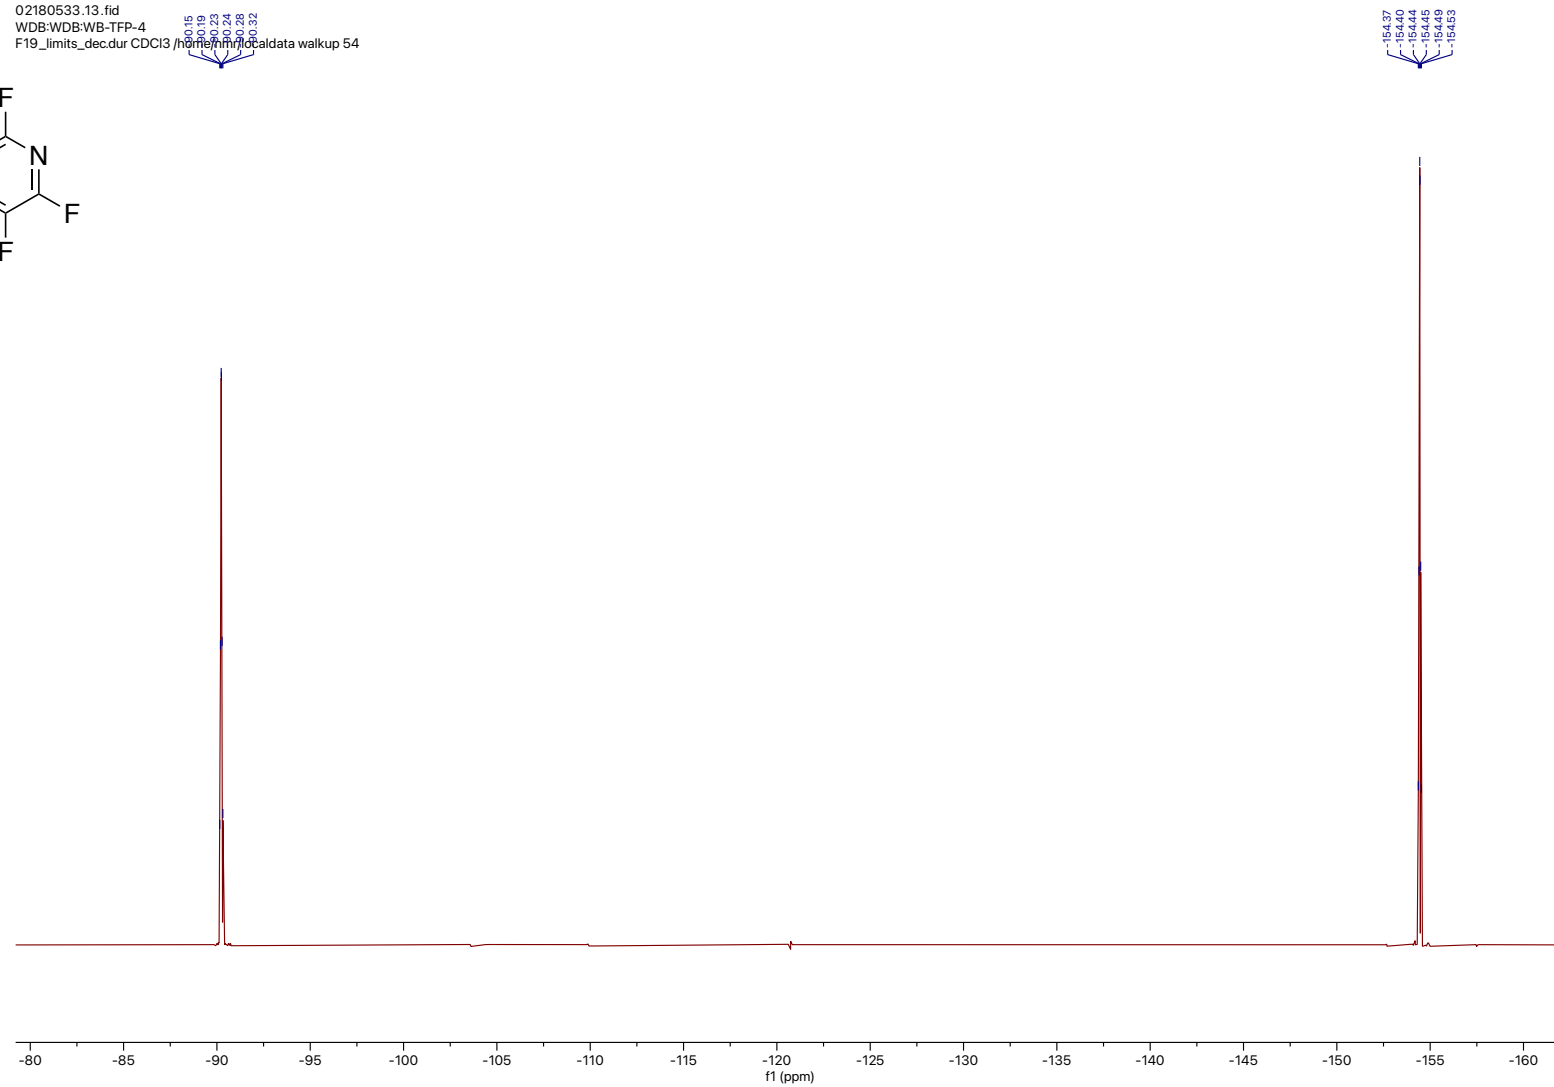

Figure S73.  $^{19}\text{F}\{^1\text{H}\}$  NMR spectrum of **28** recorded at 376 MHz in  $\text{CDCl}_3$ .

02180533.14.fid  
WDB:WDB:WB-TFP-4  
Carbon.dur CDCl3 /home/nmr/localdata/walkup 54

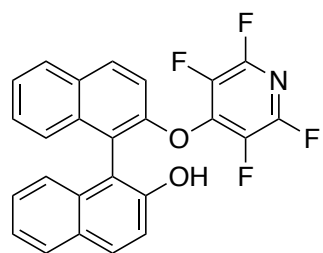

**28**

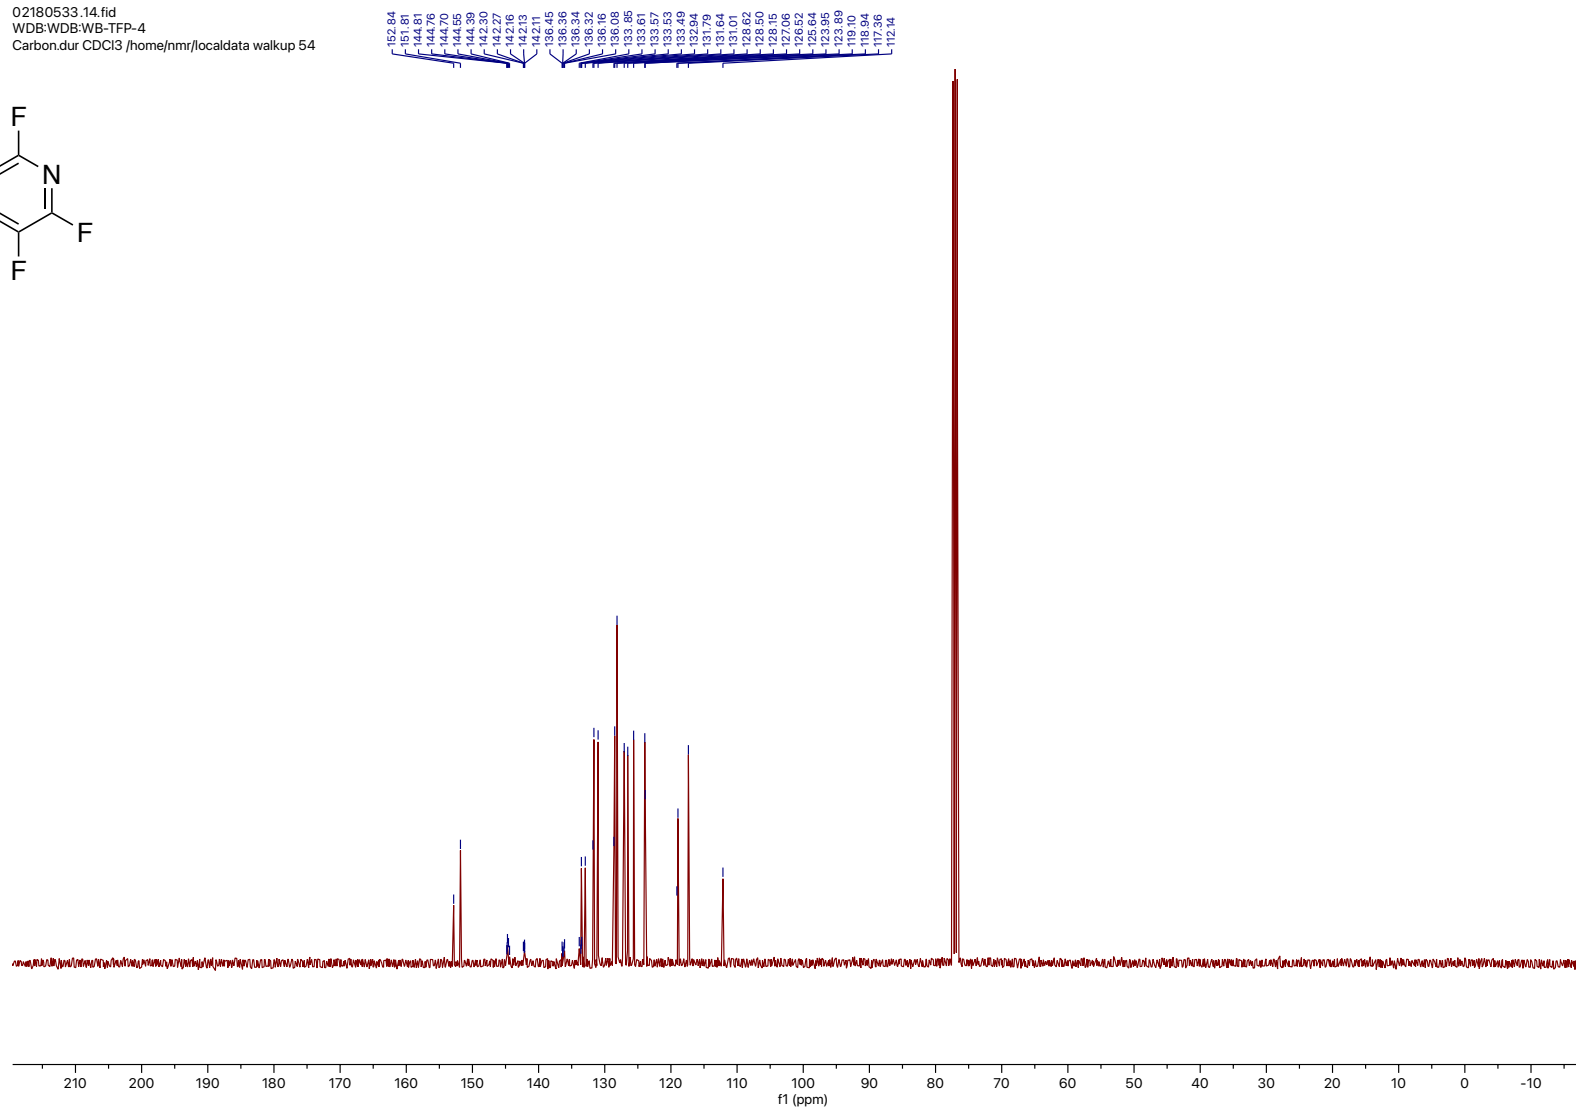

**Figure S74.**  $^{13}\text{C}\{^1\text{H}\}$  NMR spectrum of **28** recorded at 101 MHz in  $\text{CDCl}_3$ .

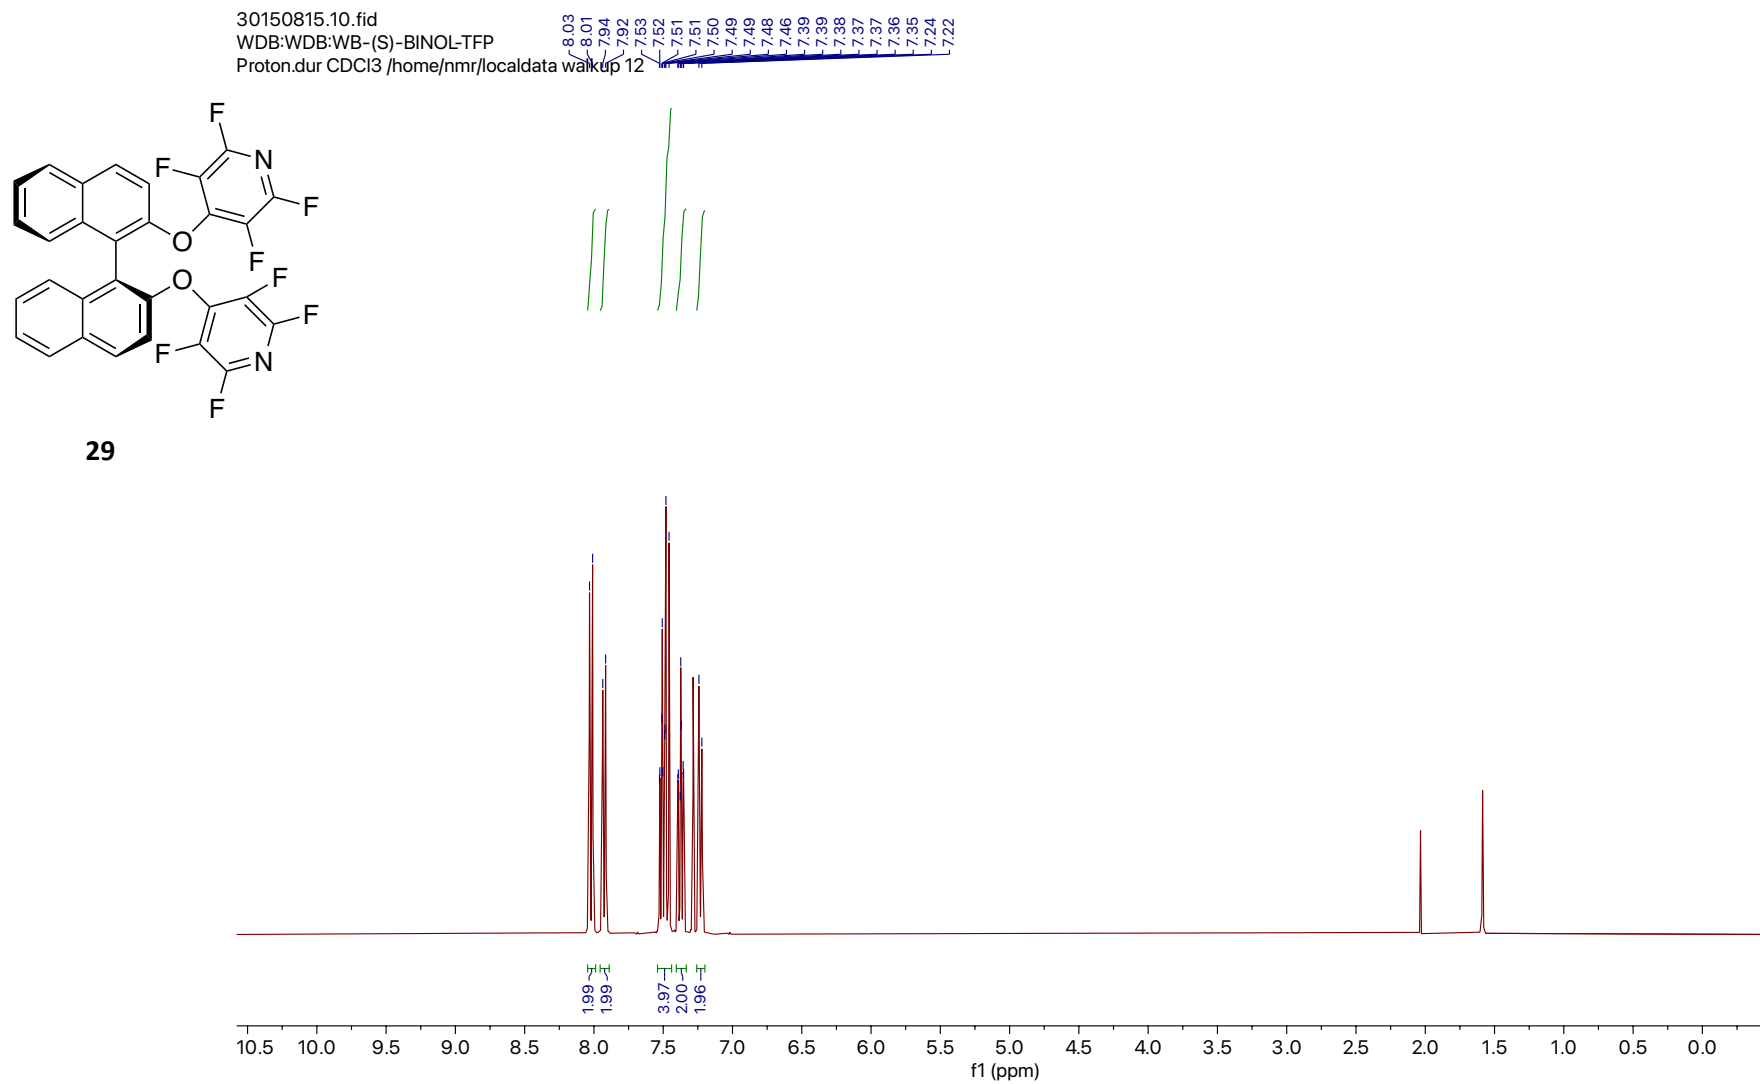

**Figure S75.** <sup>1</sup>H NMR spectrum of **29** recorded at 400 MHz in CDCl<sub>3</sub>.

30150815.13.fid  
WDB:WDB:WB-(S)-BINOL-T  
F19\_limits\_dec.dur CDCI3/home/nmr/qcaldat/walkup 12

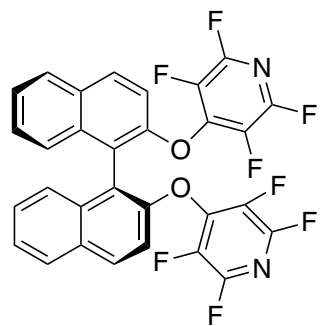

29

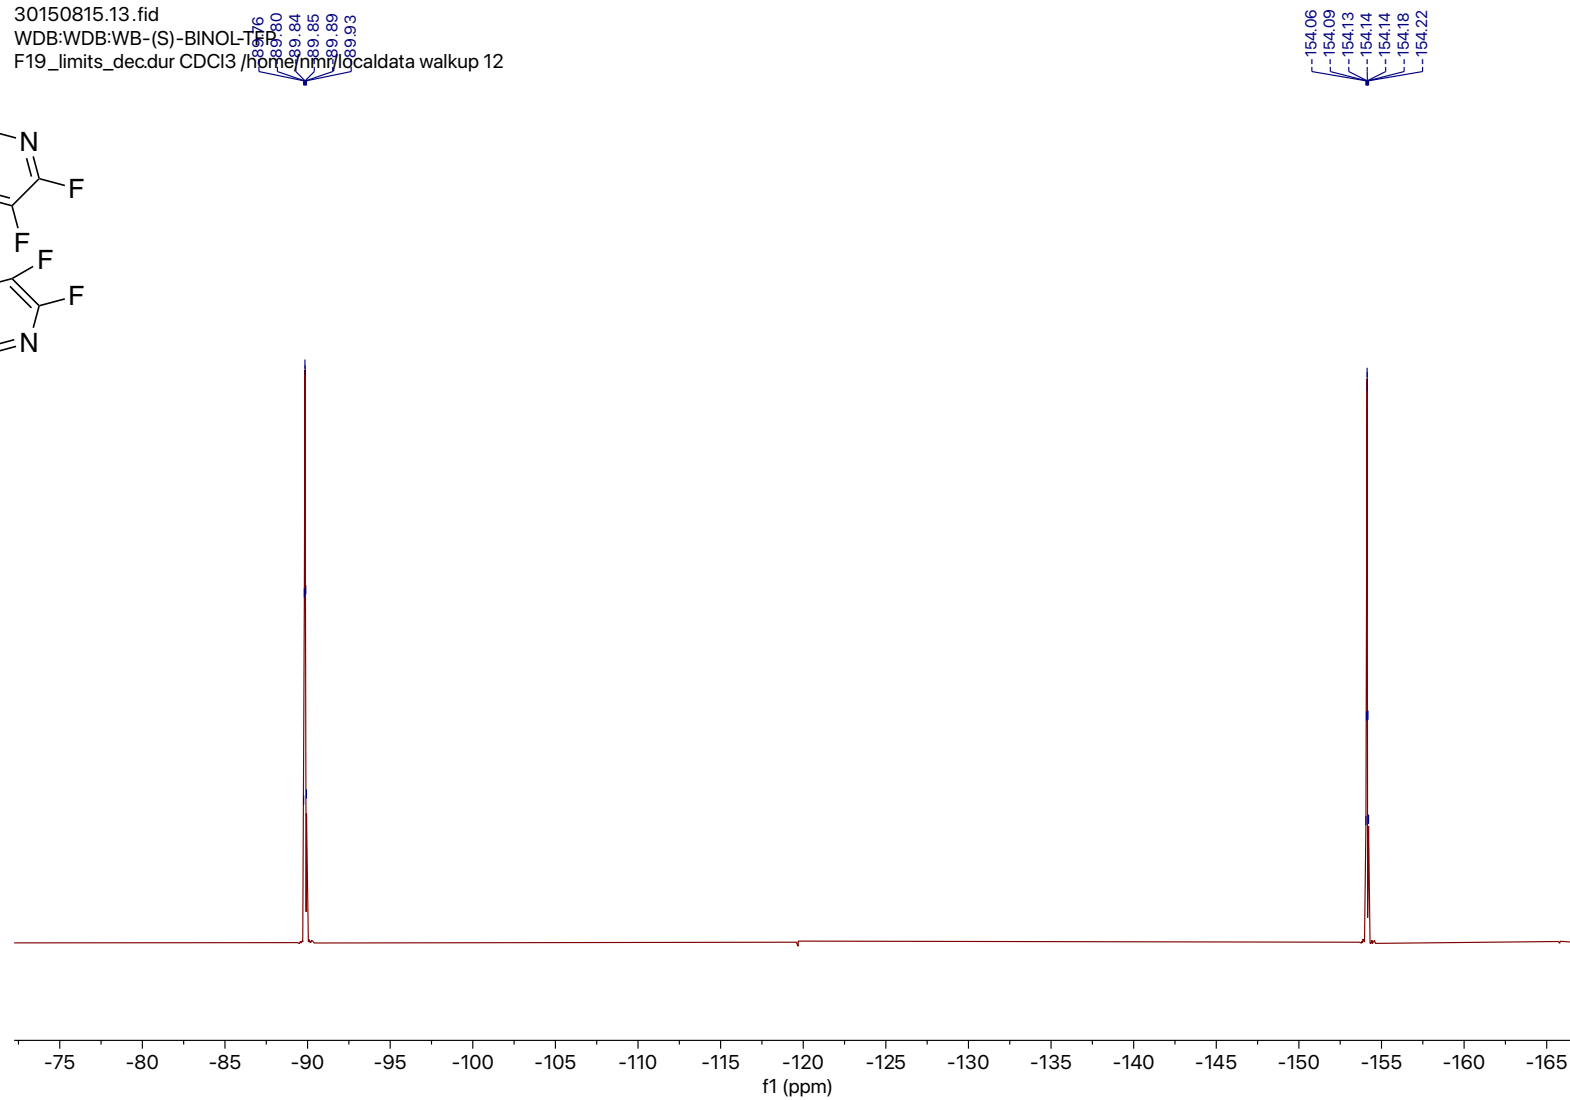

Figure S76.  $^{19}\text{F}\{^1\text{H}\}$  NMR spectrum of **29** recorded at 376 MHz in  $\text{CDCl}_3$ .

3015081514.fid  
WDB: WDB-416  
Carbon-13 NMR  
CDCl<sub>3</sub> / home/nmr/local/data/walkup/12

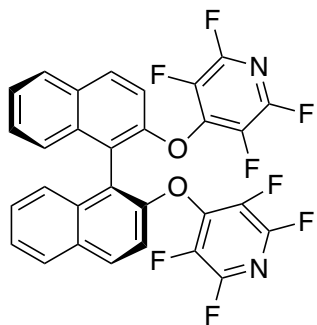

**29**

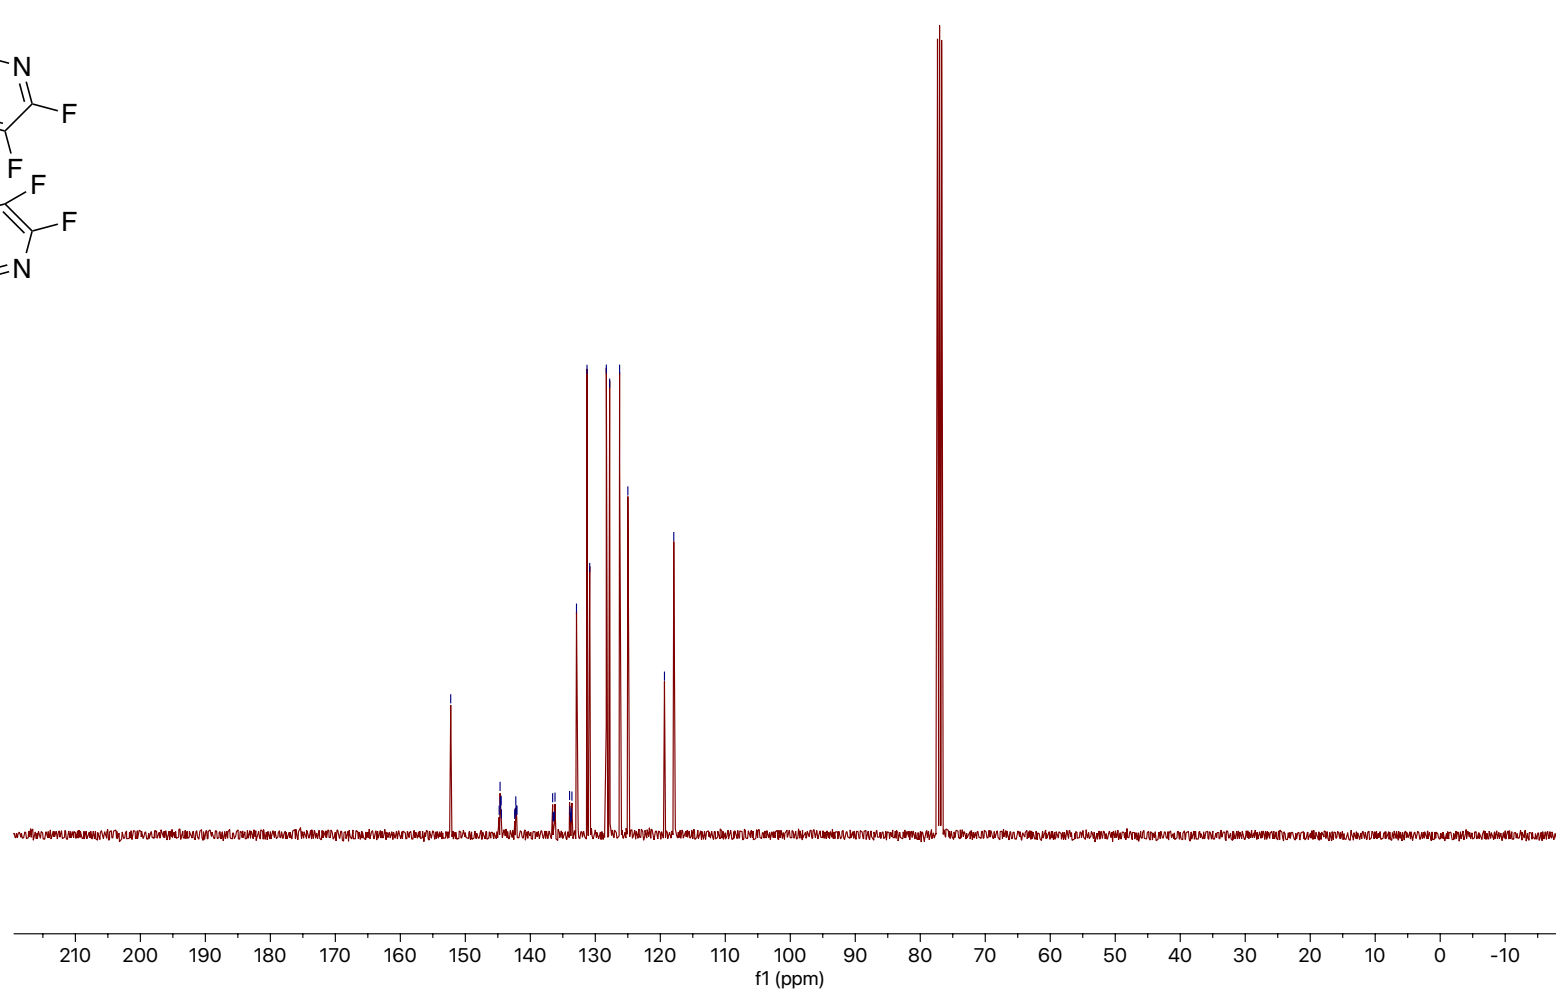

Figure S77. <sup>13</sup>C{<sup>1</sup>H} NMR spectrum of **29** recorded at 101 MHz in CDCl<sub>3</sub>.

02180415.10.fid  
WDB:WDB:WB-TFP-1  
Proton.dur CDCl3 /home/nmr/localdata/walkup 51

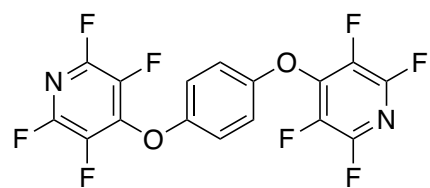

**30**

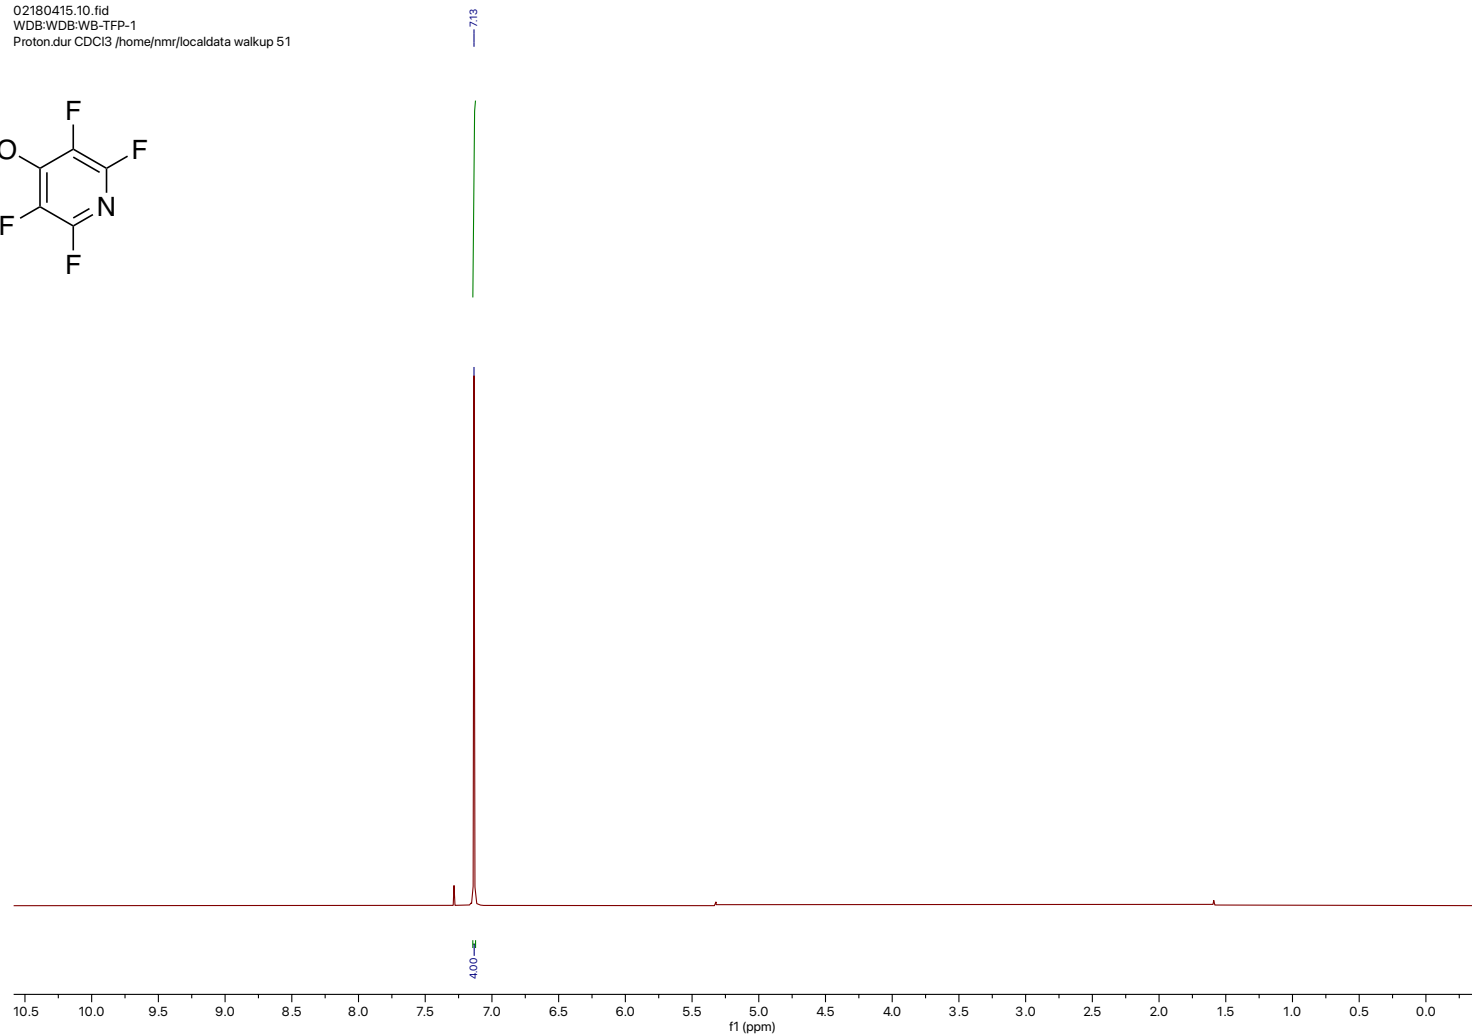

**Figure S78.**  $^1\text{H}$  NMR spectrum of **30** recorded at 400 MHz in  $\text{CDCl}_3$ .

02180415.13.fid  
WDB:WDB:WB-TFP-1  
F19\_limits\_dec.dur CDCl3 /home/nmr/localdata/walkup 5

88.10  
88.14  
88.18  
88.19  
88.23  
88.27

154.23  
154.26  
154.30  
154.32  
154.39

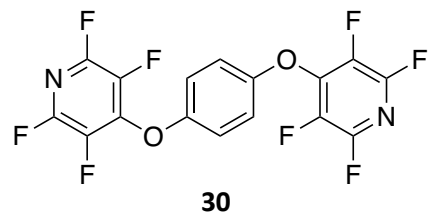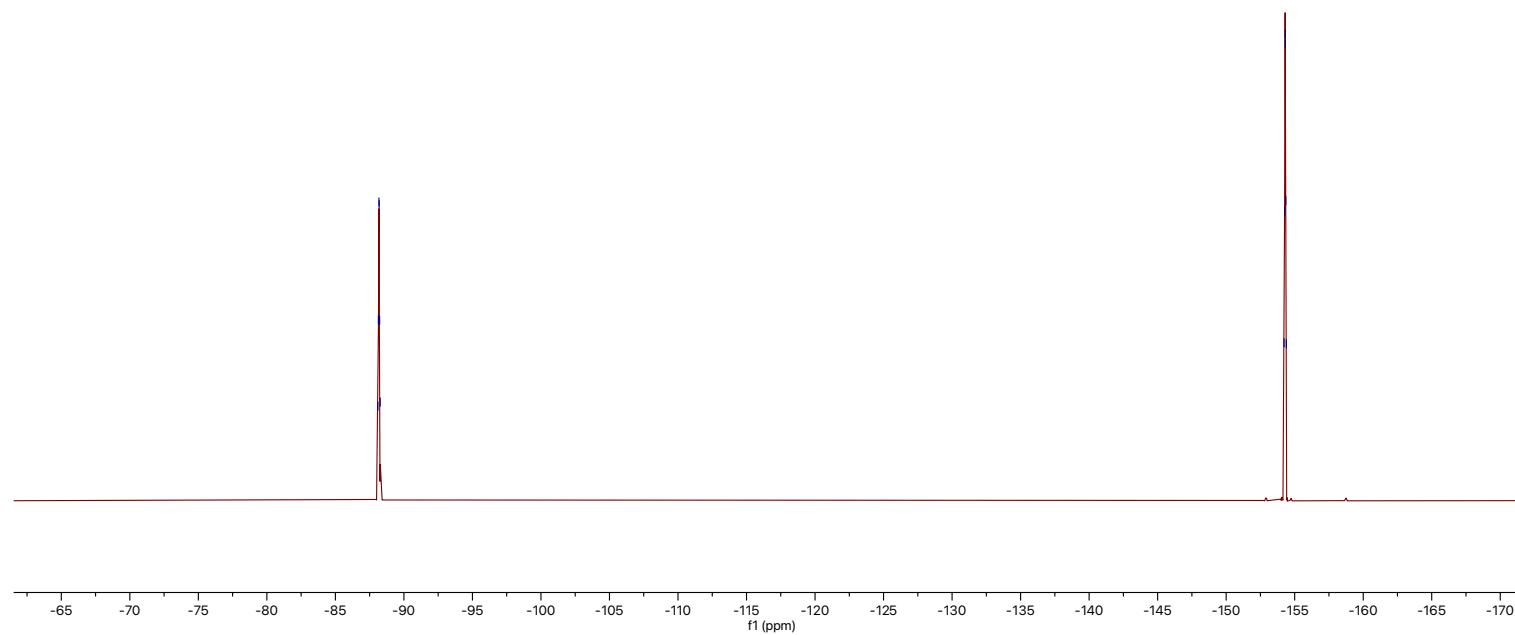

**Figure S79.**  $^{19}\text{F}\{^1\text{H}\}$  NMR spectrum of **30** recorded at 376 MHz in  $\text{CDCl}_3$ .

02180415.14.fid  
WDB-WDB-WB-TFP-1  
Carbon.dur CDCl3 /home/nmr/localdata/walkup

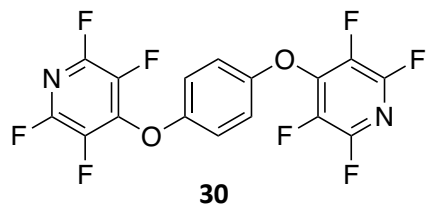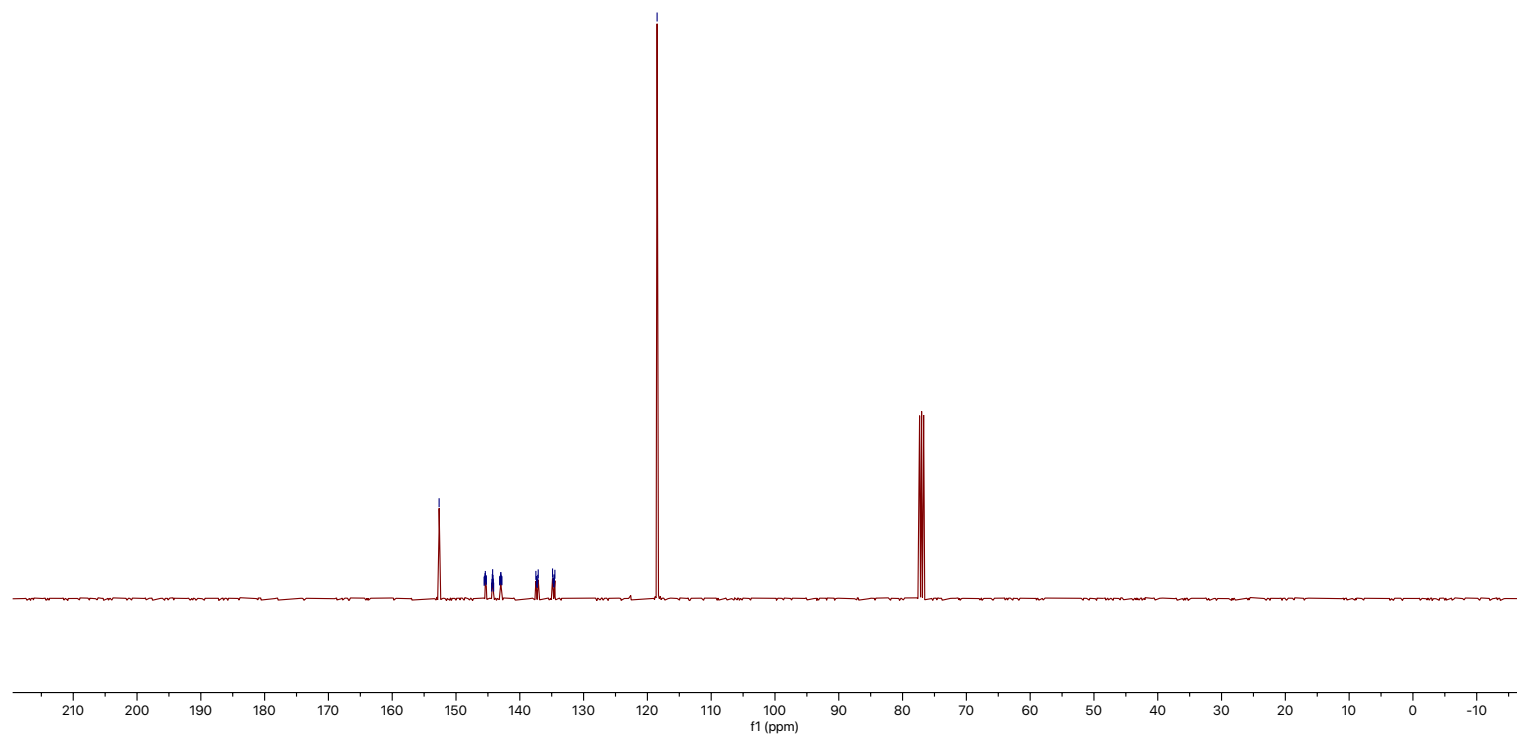

Figure S80.  $^{13}\text{C}\{^1\text{H}\}$  NMR spectrum of **30** recorded at 101 MHz in  $\text{CDCl}_3$ .

07094253.10.fid  
SLC:WDGB:WB4-141

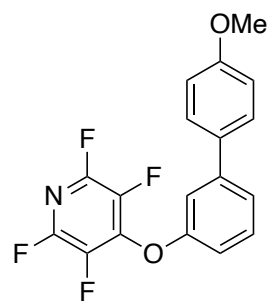

**31**

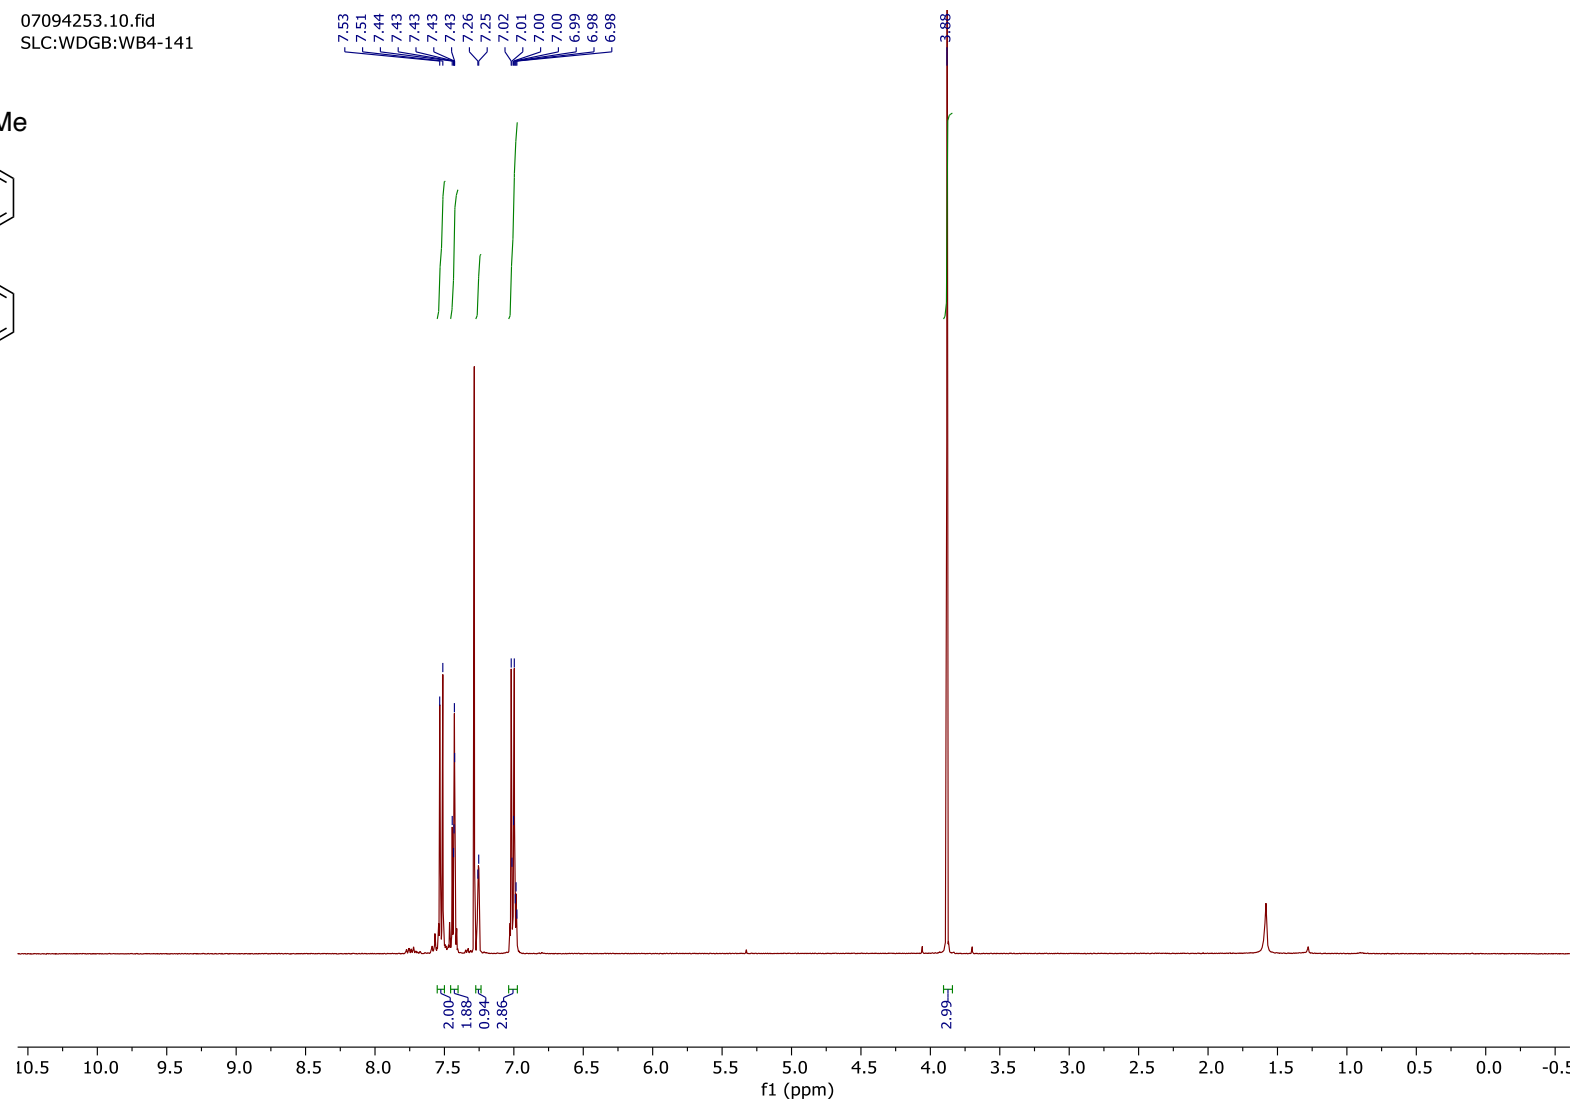

Figure S81. <sup>1</sup>H NMR spectrum of **31** recorded at 400 MHz in CDCl<sub>3</sub>.



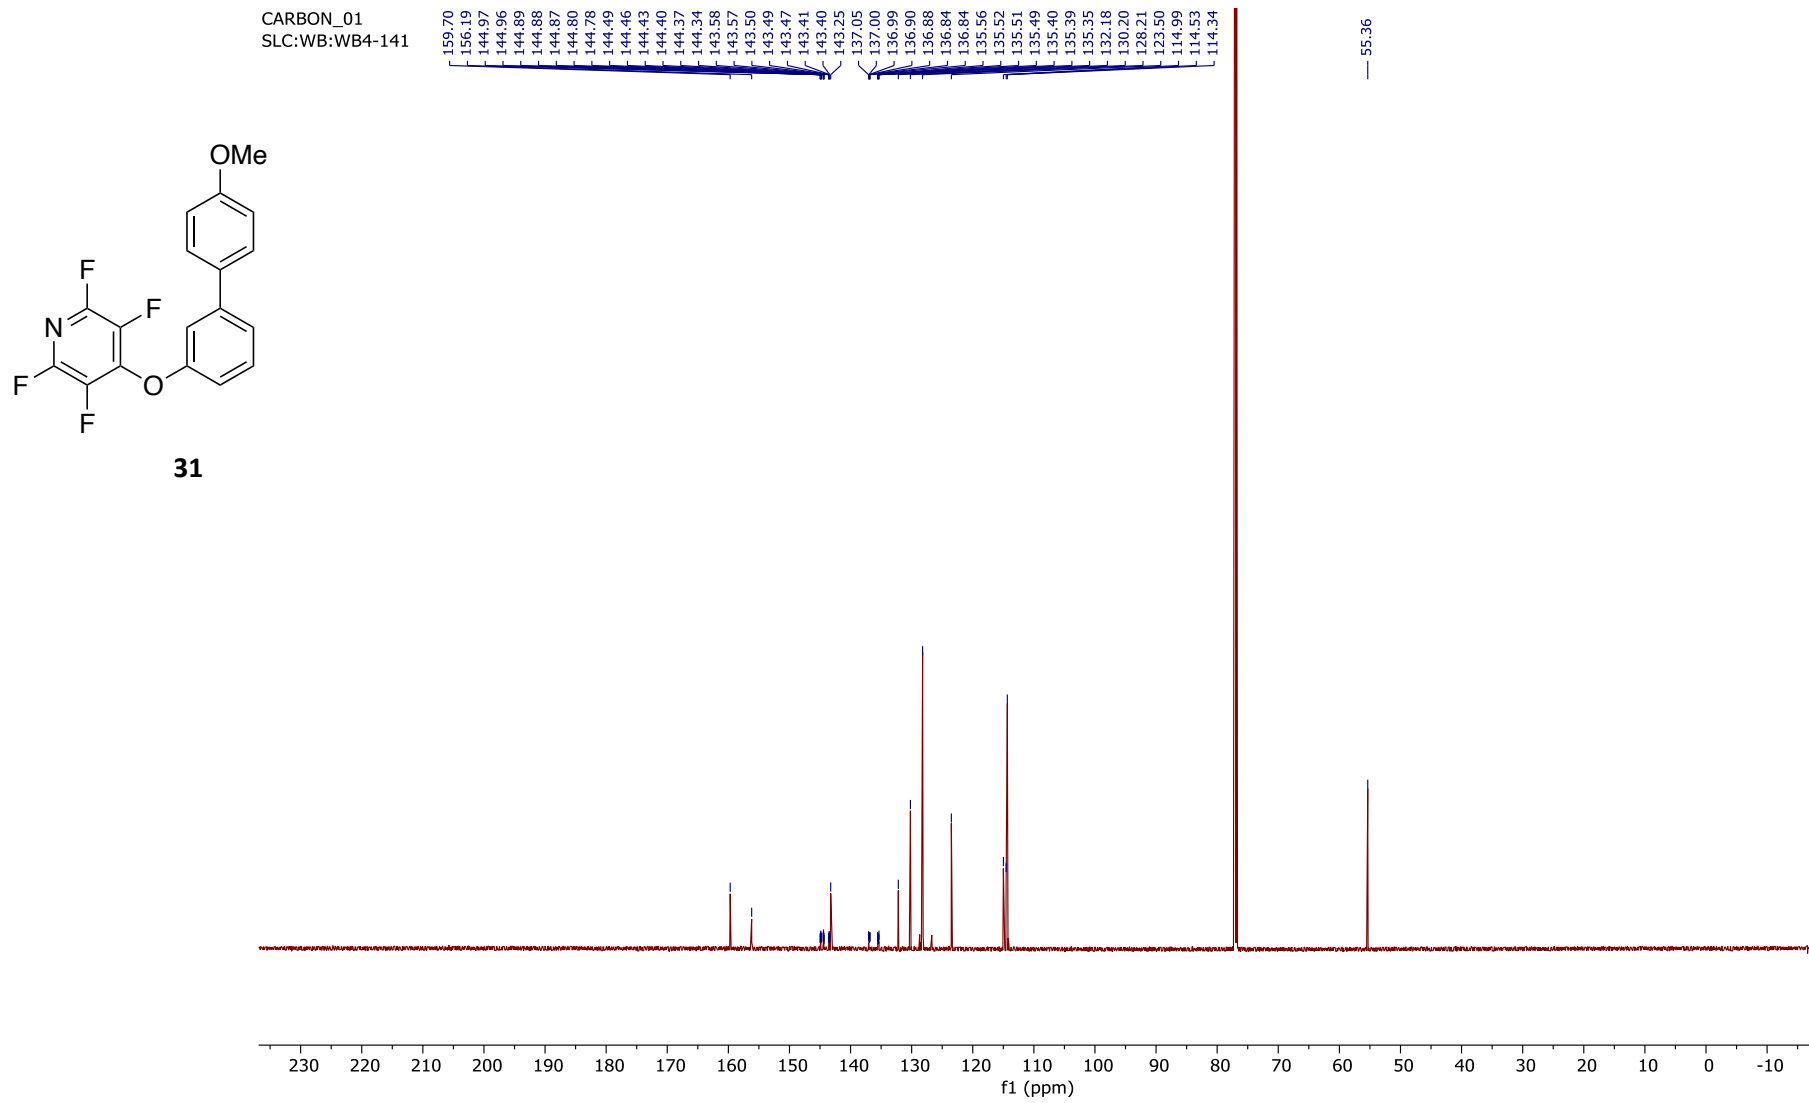

Figure S83.  $^{13}\text{C}\{^1\text{H}\}$  NMR spectrum of **31** recorded at 176 MHz in  $\text{CDCl}_3$ .

02180507.10.fid  
WDB:WDB:WB-TFP-3  
Proton.dur CDCl3 /home/nmr/localdata walkup 53

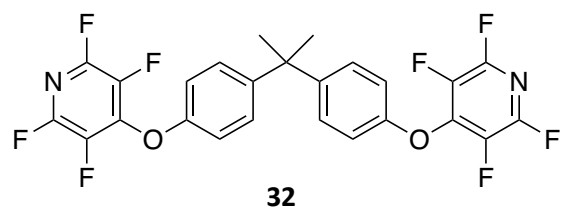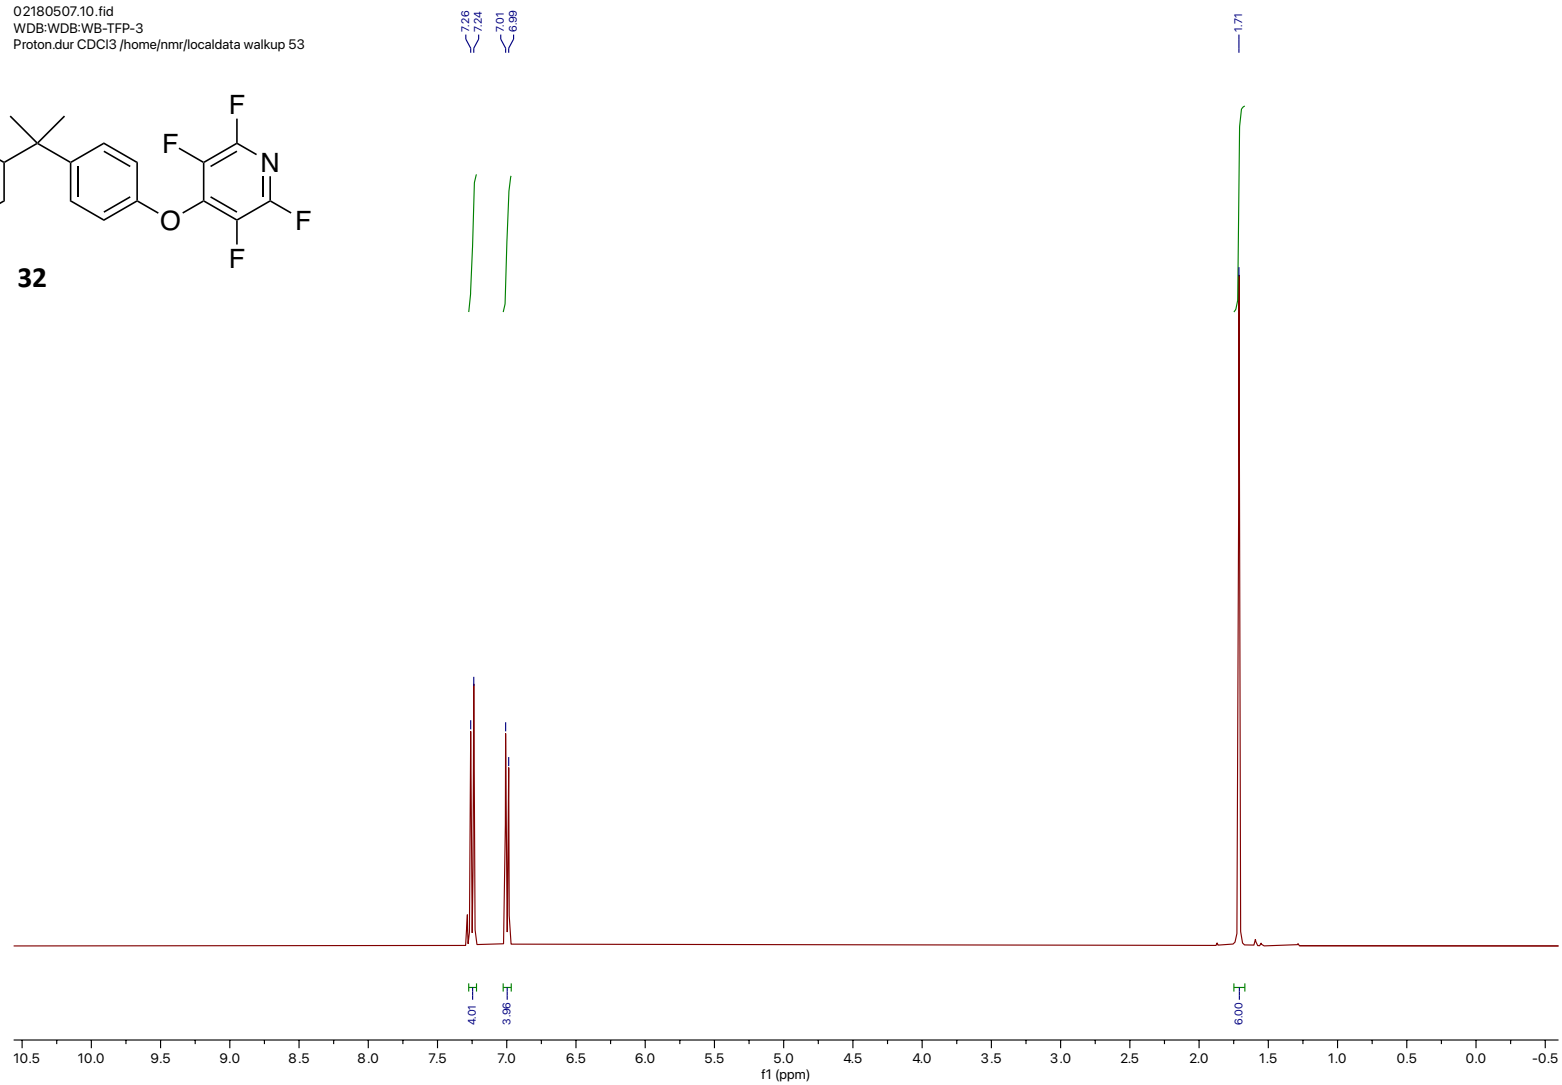

Figure S84.  $^1\text{H}$  NMR spectrum of **32** recorded at 400 MHz in  $\text{CDCl}_3$ .

02180507.13.fid  
WDB:WDB:WB-TFP-3  
F19\_limits\_dec.dur CDCl3 /home/nmr/localdata/walkup/53

89.66  
89.70  
89.74  
89.79

154.23  
154.27  
154.31  
154.32  
154.36

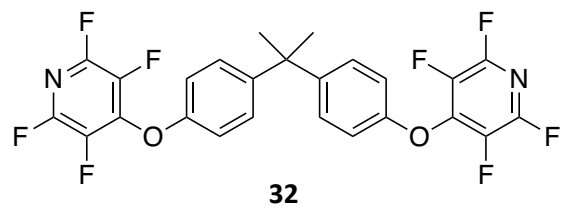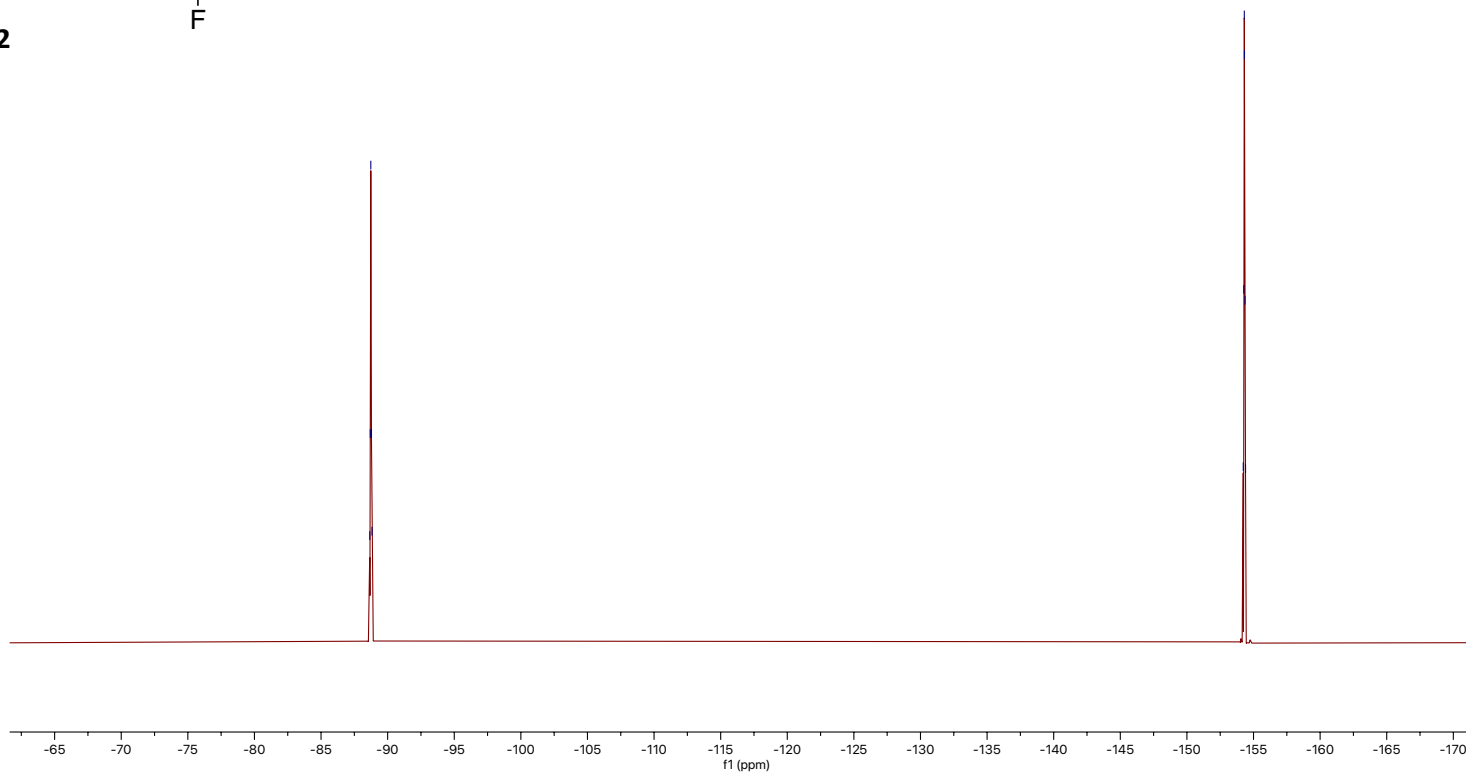

**Figure S85.**  $^{19}\text{F}\{^1\text{H}\}$  NMR spectrum of **32** recorded at 376 MHz in  $\text{CDCl}_3$ .

02180507.14.fid  
WDB:WDB:WB-TFP-3  
Carbon.dur CDCl3 /home/nmr/localdata/walkup

153.957  
149.724  
146.555  
146.541  
146.377  
145.276  
145.222  
144.664  
144.588  
144.488  
144.488  
144.437  
144.371  
143.113  
142.999  
142.997  
142.993  
142.883  
142.866  
137.680  
137.600  
137.555  
137.446  
137.400  
137.320  
135.068  
135.000  
134.779  
134.771  
128.522  
116.27

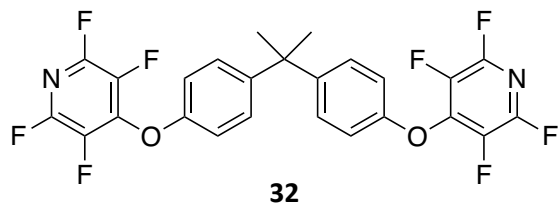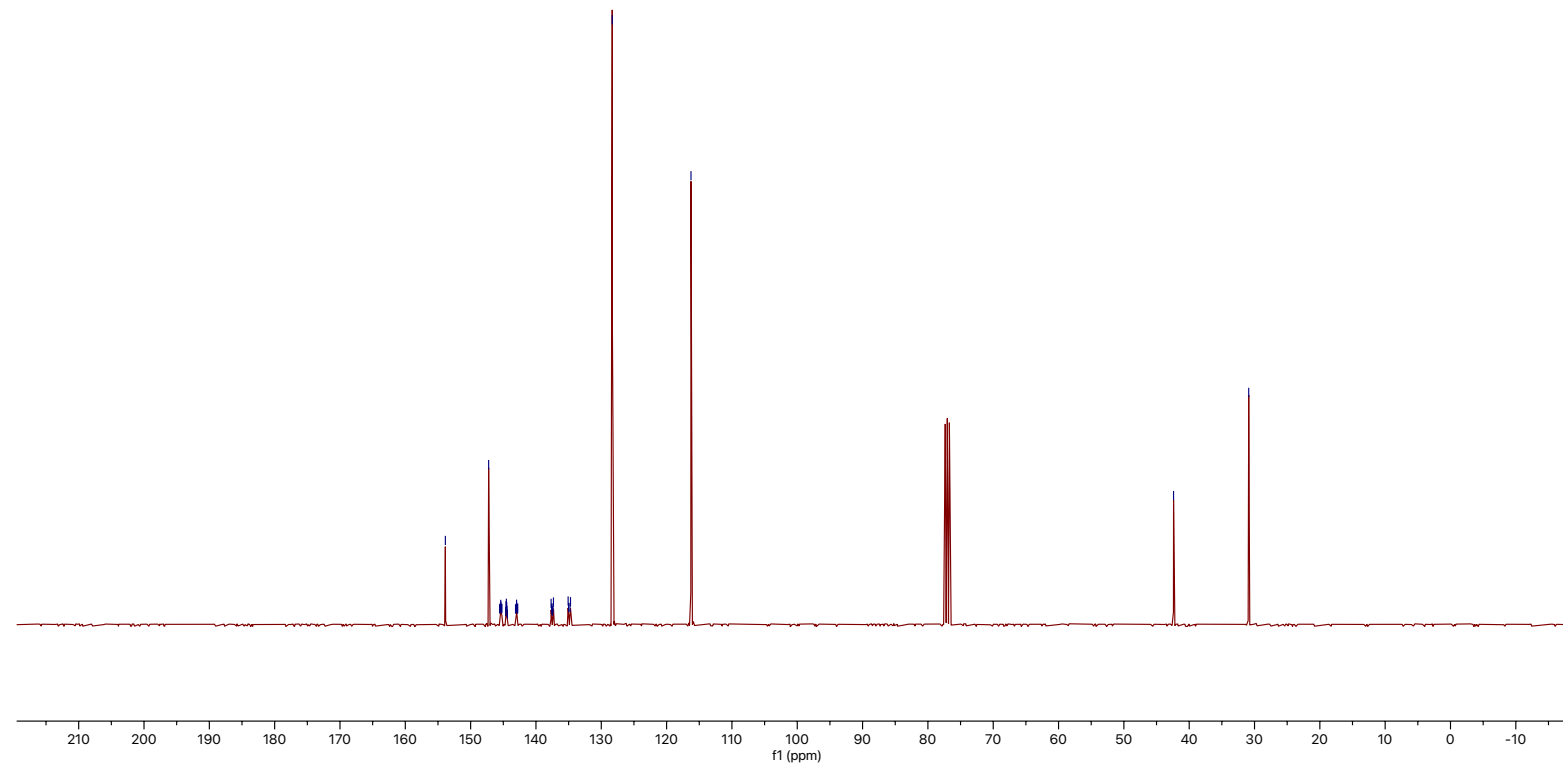

Figure S86.  $^{13}\text{C}\{^1\text{H}\}$  NMR spectrum of **32** recorded at 101 MHz in  $\text{CDCl}_3$ .

02180444.10.fid  
WDB:WDB:WB-TFP-2  
Proton.dur CDCl3 /home/nmr/localdata/walkup 52

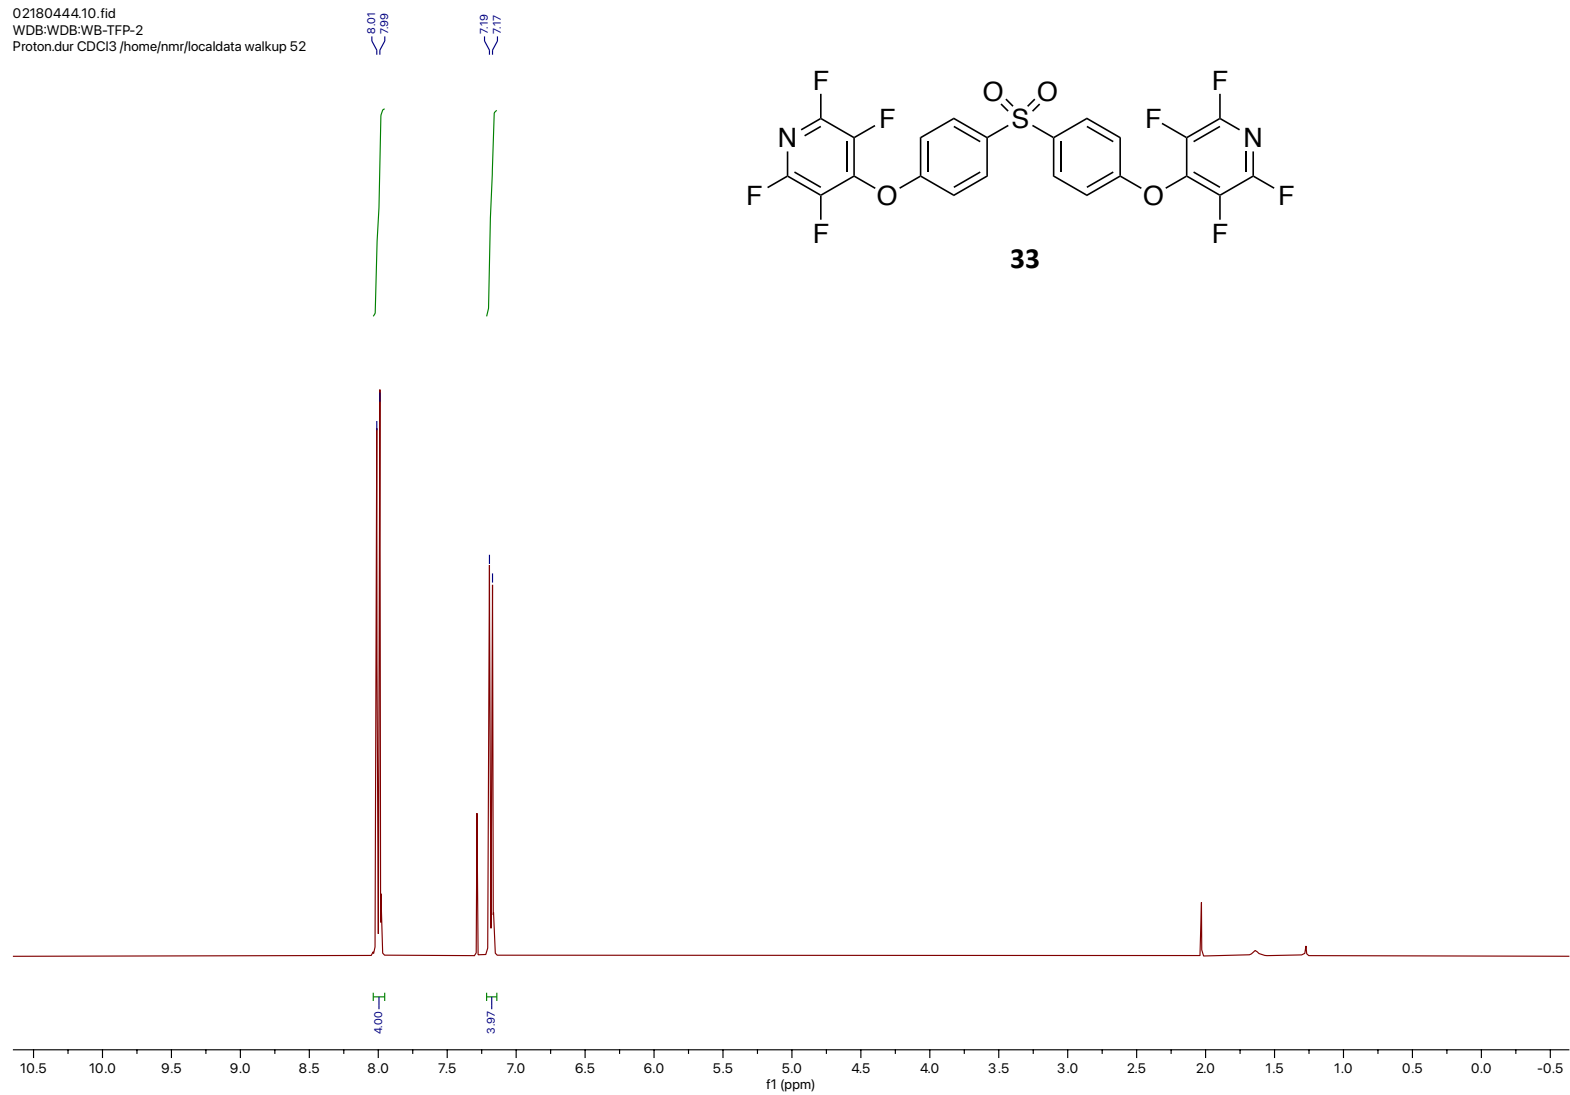

Figure S87.  $^1\text{H}$  NMR spectrum of **33** recorded at 400 MHz in  $\text{CDCl}_3$ .

02180444.13.fid  
WDB:WDB:WB-TFP-2  
F19\_limits\_dec.dur CDCI3 /home/nmr/local/

152.98  
152.96  
152.94  
152.92  
152.90  
152.88  
153.02  
153.04  
153.06

152.94  
152.98  
153.02  
153.04  
153.07  
153.11

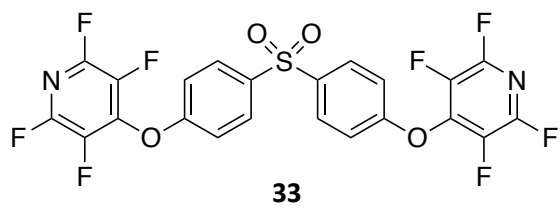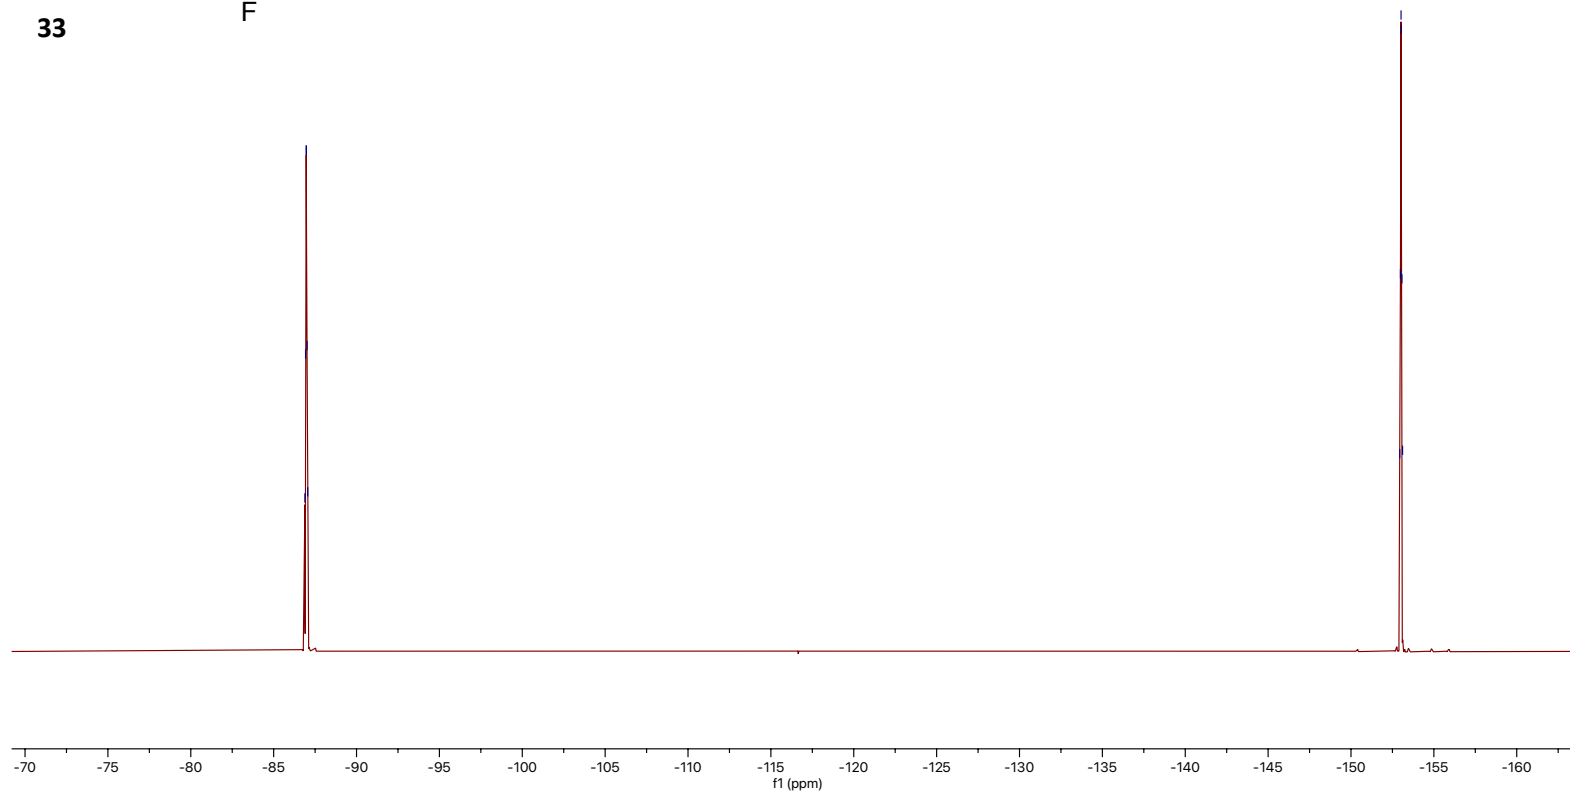

Figure S88.  $^{19}\text{F}\{^1\text{H}\}$  NMR spectrum of **33** recorded at 376 MHz in  $\text{CDCl}_3$ .

02180444.14.fid  
WDB:WDB:WB-TFP-2  
Carbon.dur CDCl3 /home/nmr/localdata/walkup/52

158.89  
146.51  
146.37  
146.27  
143.09  
142.94  
142.80  
142.69  
142.58  
142.58  
137.84  
137.69  
137.59  
137.46  
137.39  
137.39  
135.06  
134.99  
134.91  
134.77  
130.69  
130.32  
117.06

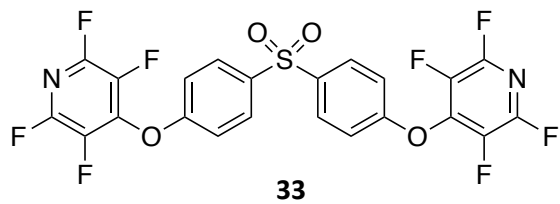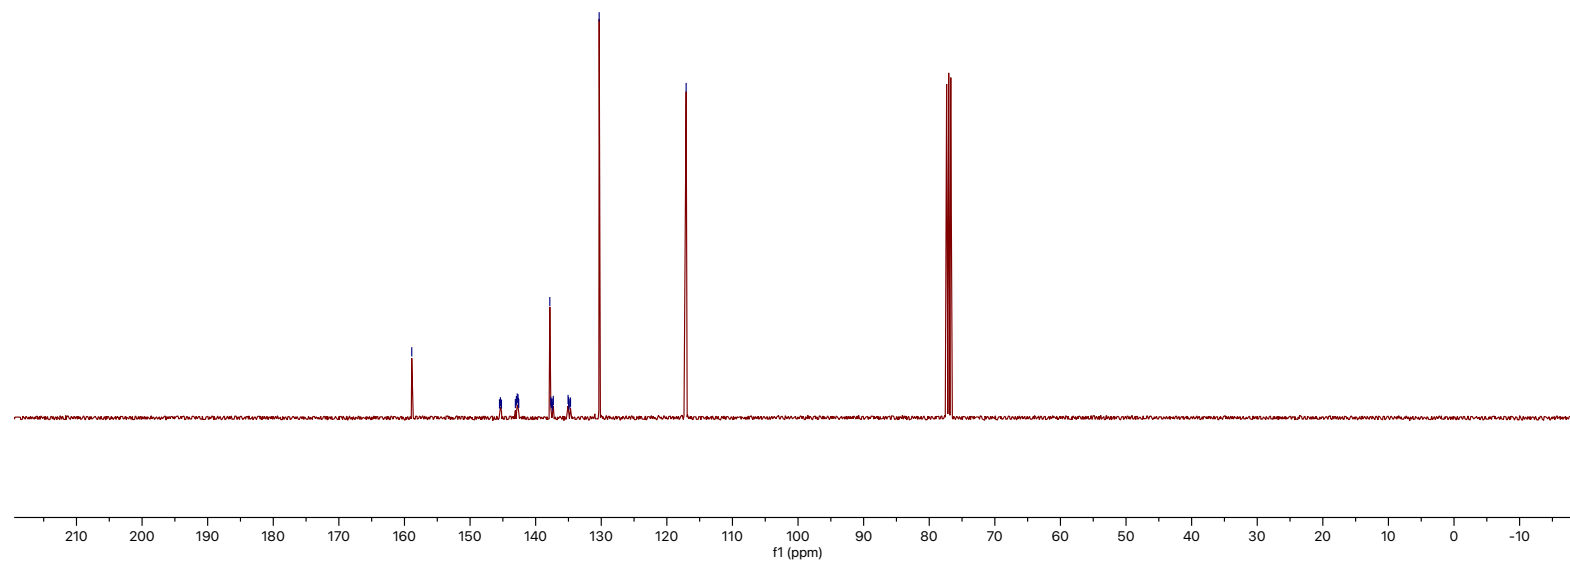

Figure S89.  $^{13}\text{C}\{^1\text{H}\}$  NMR spectrum of **33** recorded at 101 MHz in  $\text{CDCl}_3$ .

05094857.10.fid  
SLC:WDGB:WB5-69

7.50  
7.23  
7.21  
7.01  
6.98  
5.66

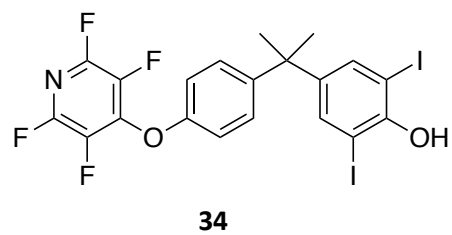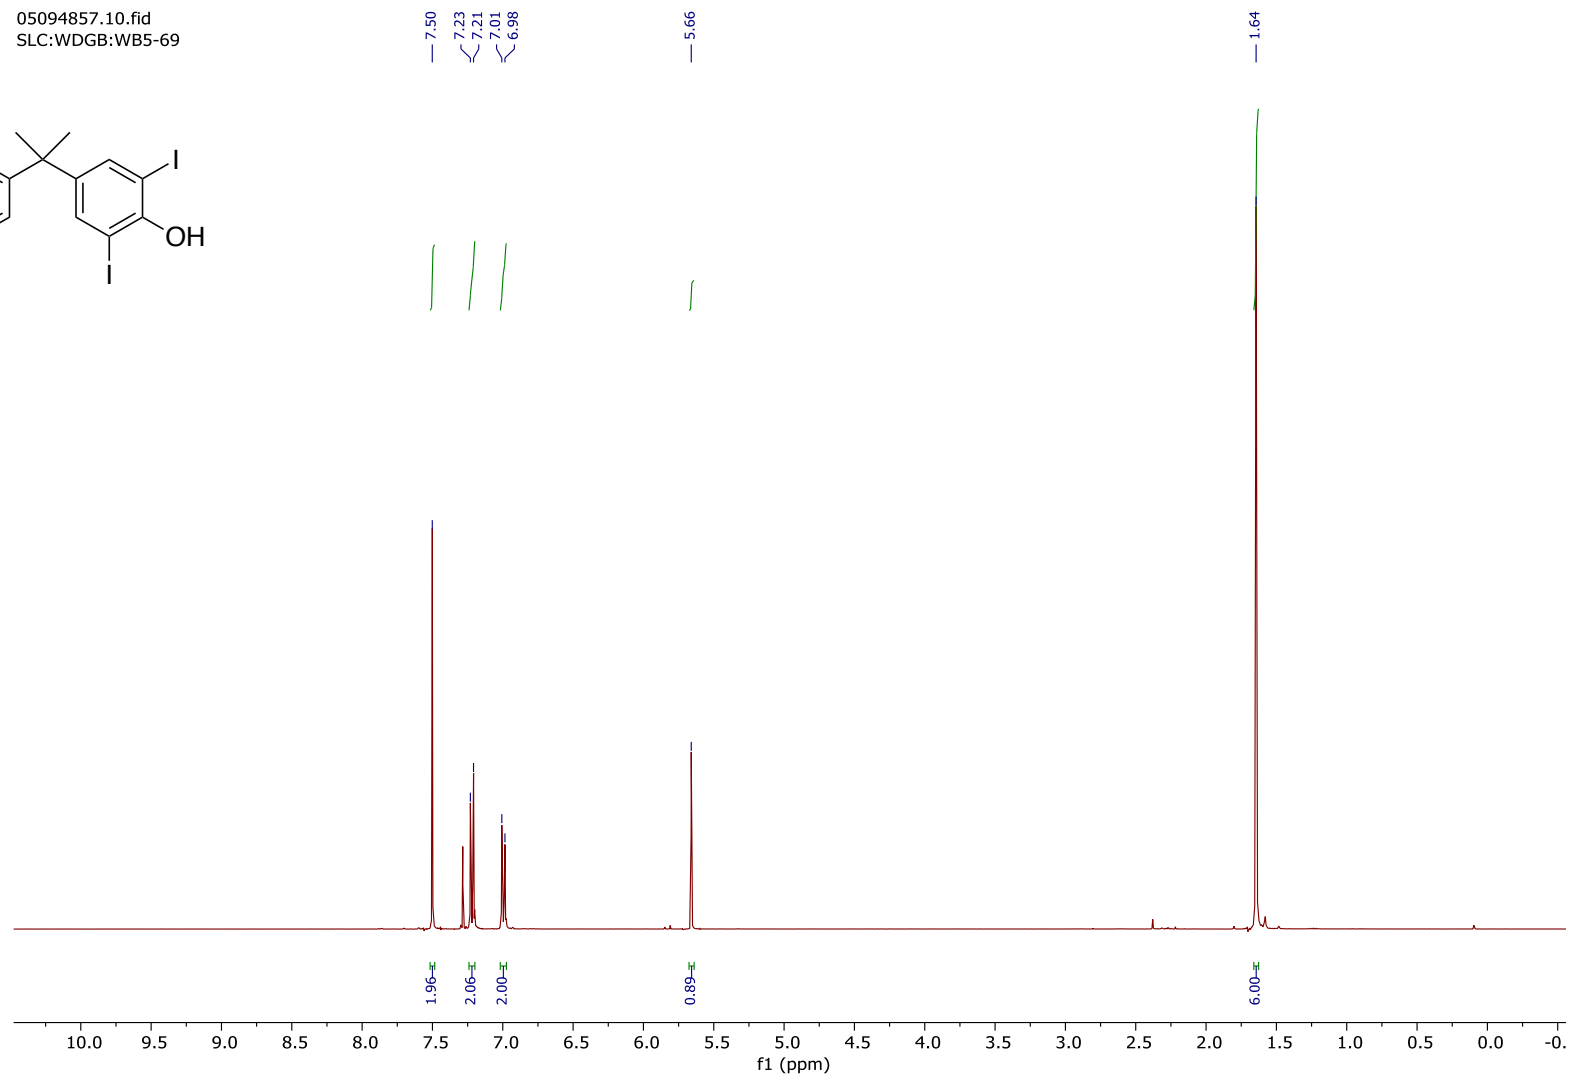

Figure S90.  $^1\text{H}$  NMR spectrum of **34** recorded at 400 MHz in  $\text{CDCl}_3$ .

05094857.13.fid  
SLC:WDGB:WB

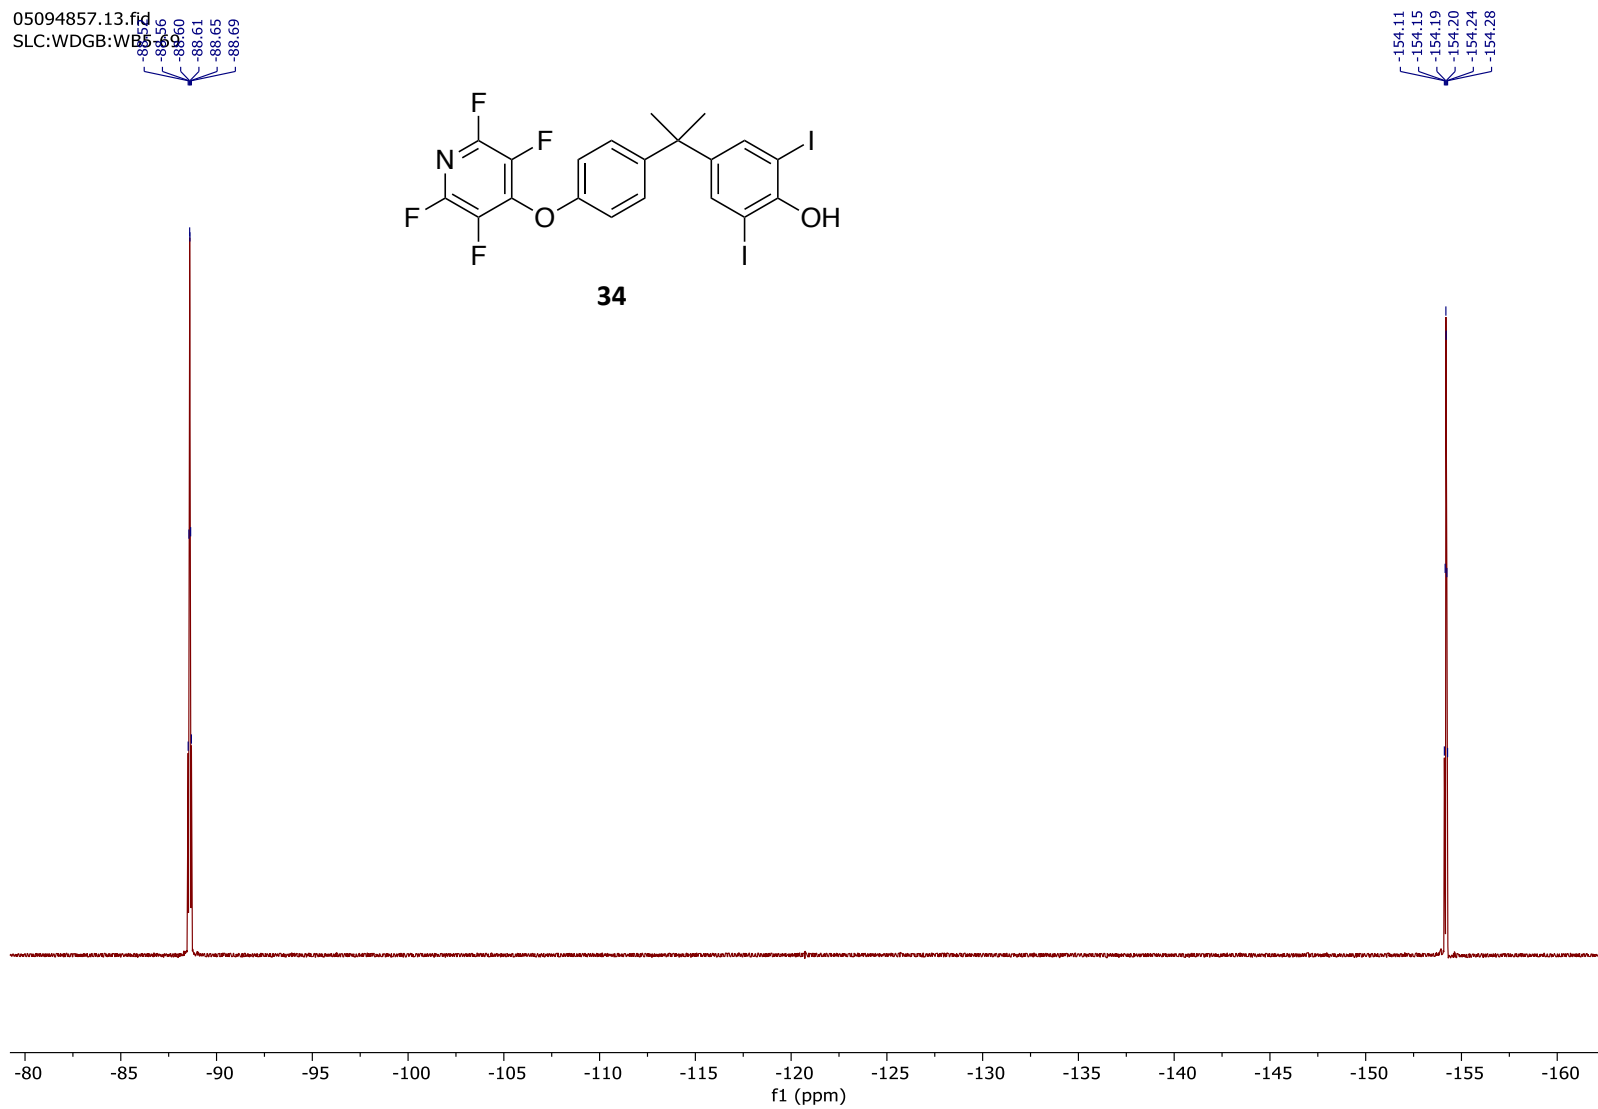

Figure S91.  $^{19}\text{F}\{^1\text{H}\}$  NMR spectrum of **34** recorded at 376 MHz in  $\text{CDCl}_3$ .

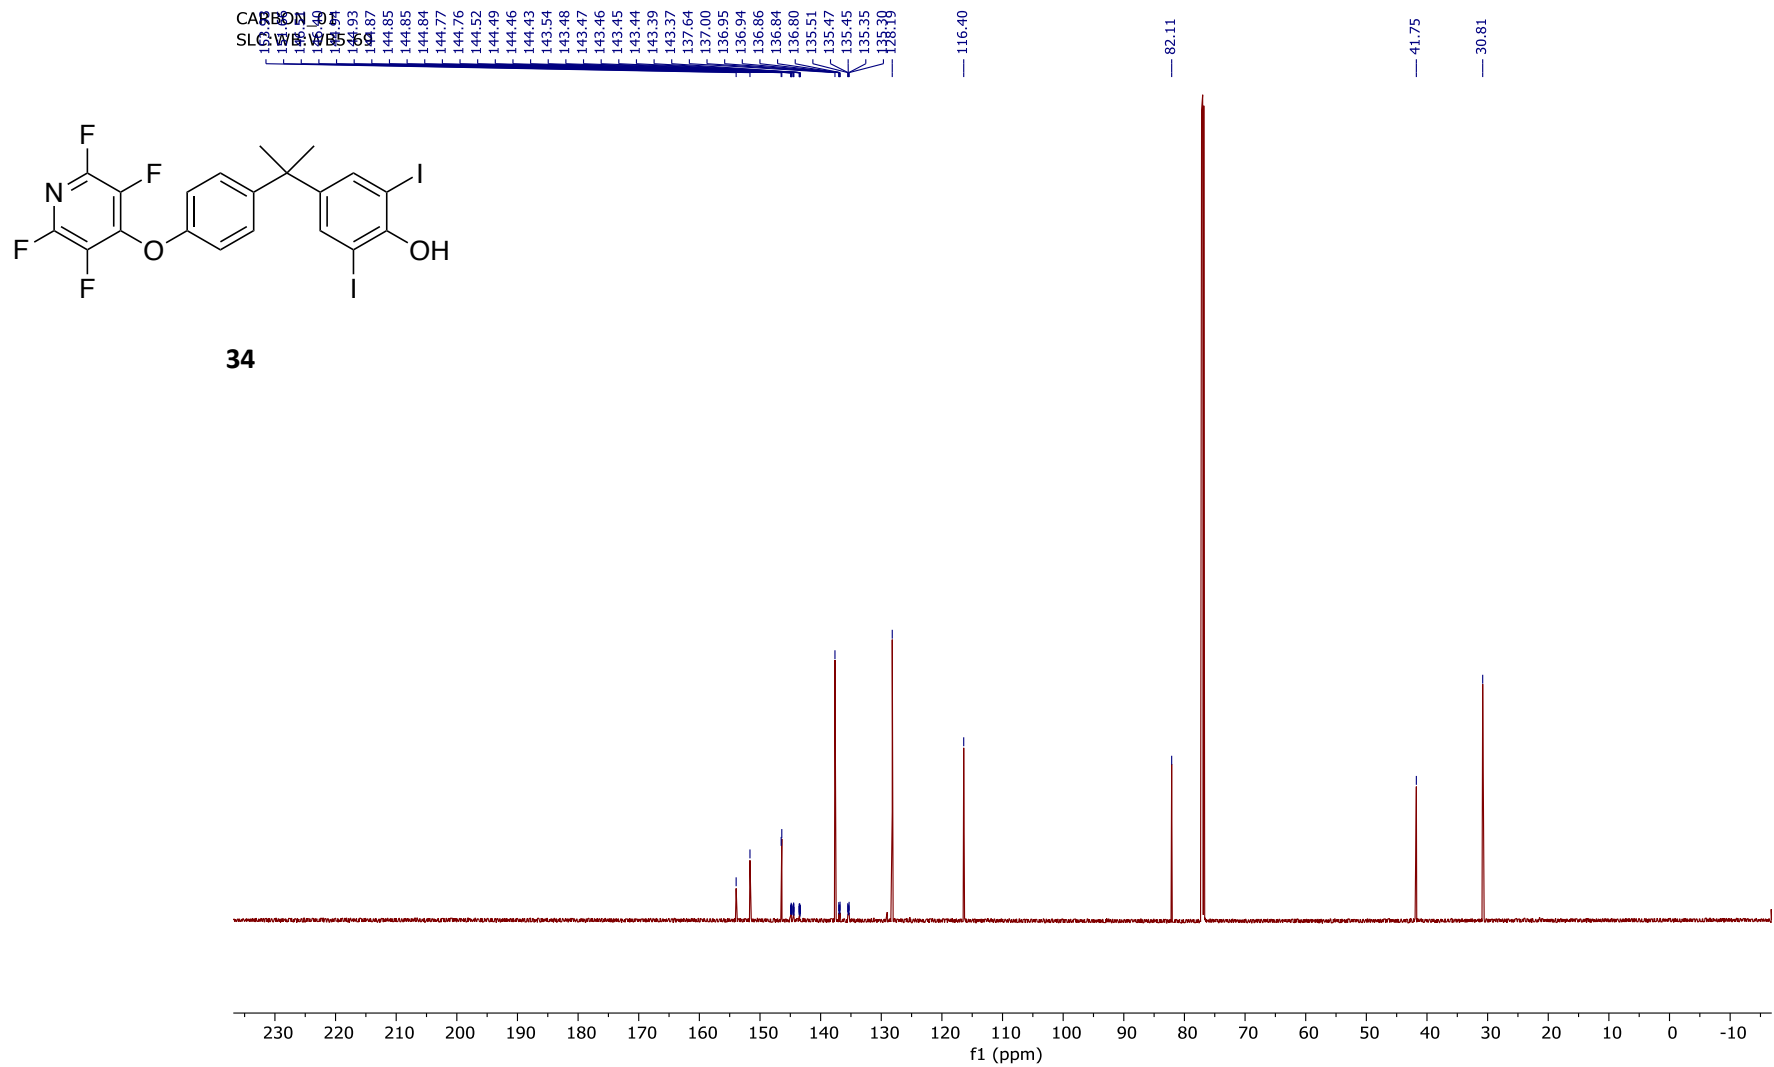

Figure S92.  $^{13}\text{C}\{^1\text{H}\}$  NMR spectrum of **34** recorded at 176 MHz in  $\text{CDCl}_3$ .

10111050.10.fid  
WDB:WDB:WB-TFP-8  
Proton.dur CDCl3 /home/nmr/localdata/walkup 11

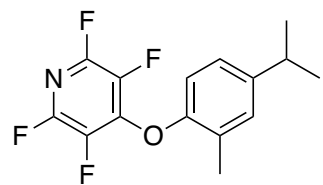

35

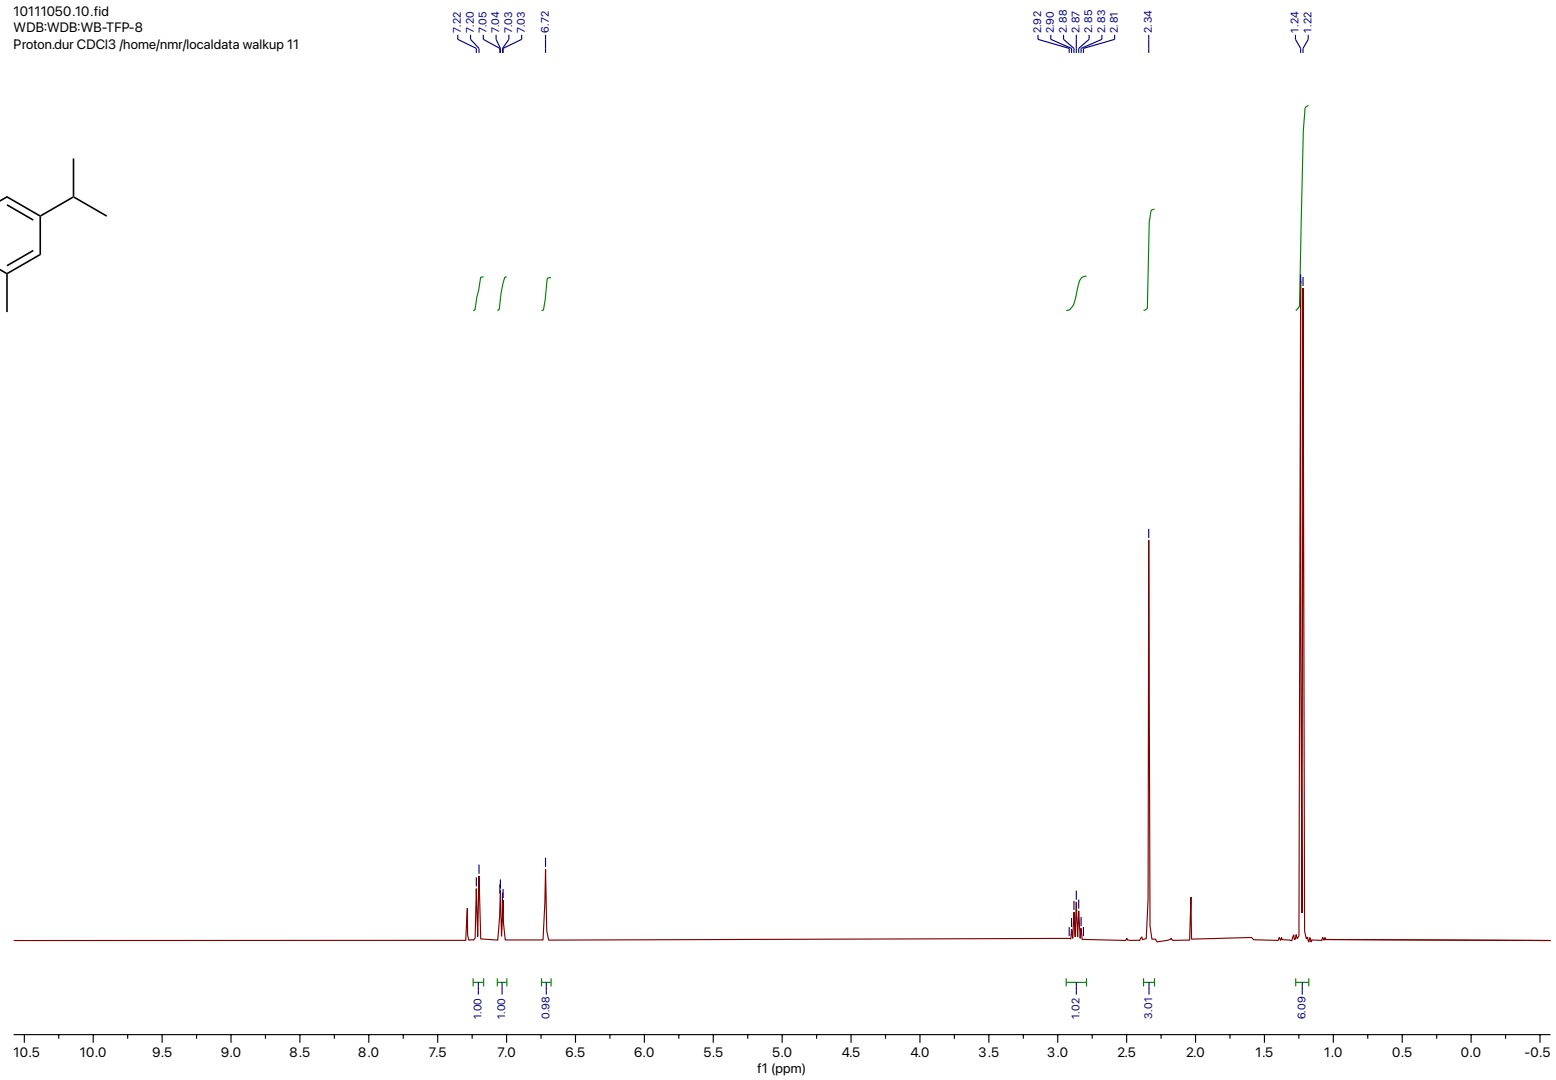

Figure S93.  $^1\text{H}$  NMR spectrum of **35** recorded at 400 MHz in  $\text{CDCl}_3$ .

1011050.13.fid  
WDB:WDB:WB-TFP-8  
F19\_limits\_dec.dur CDCl3 /home/nmr/localdata/wdb/

91.17  
91.21  
91.25  
91.26  
91.29  
91.30  
91.34

-155.93  
-156.01  
-156.02  
-156.06  
-156.10

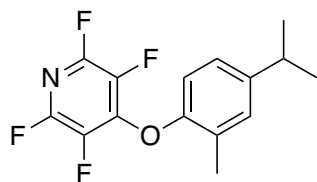

35

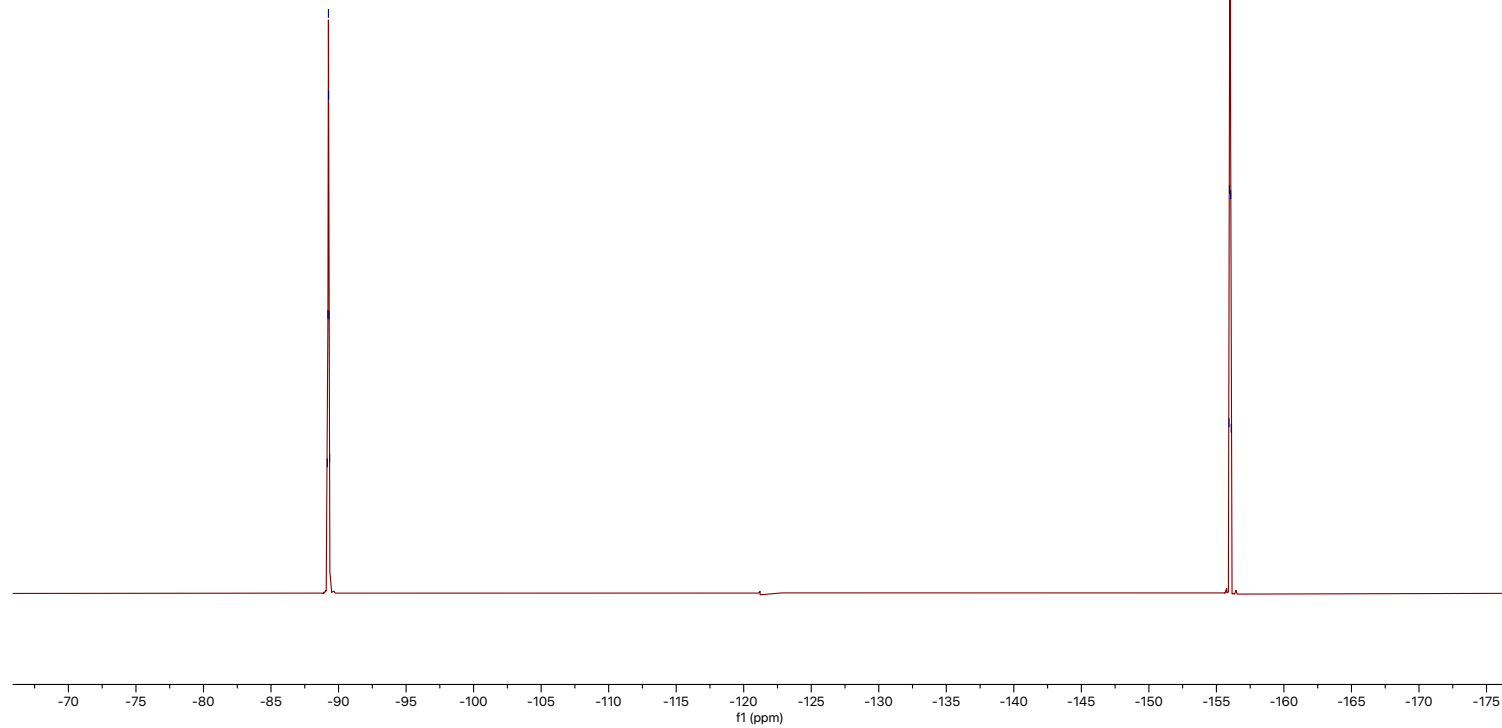

Figure S94.  $^{19}\text{F}\{^1\text{H}\}$  NMR spectrum of **35** recorded at 376 MHz in  $\text{CDCl}_3$ .

10111050.14.fid  
WDB:WDB:WB-TFP-8  
Carbon\_10min.dur CDCl3 /home/nmr/localdata/walkup/11

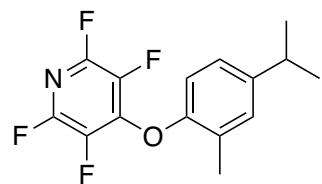

35

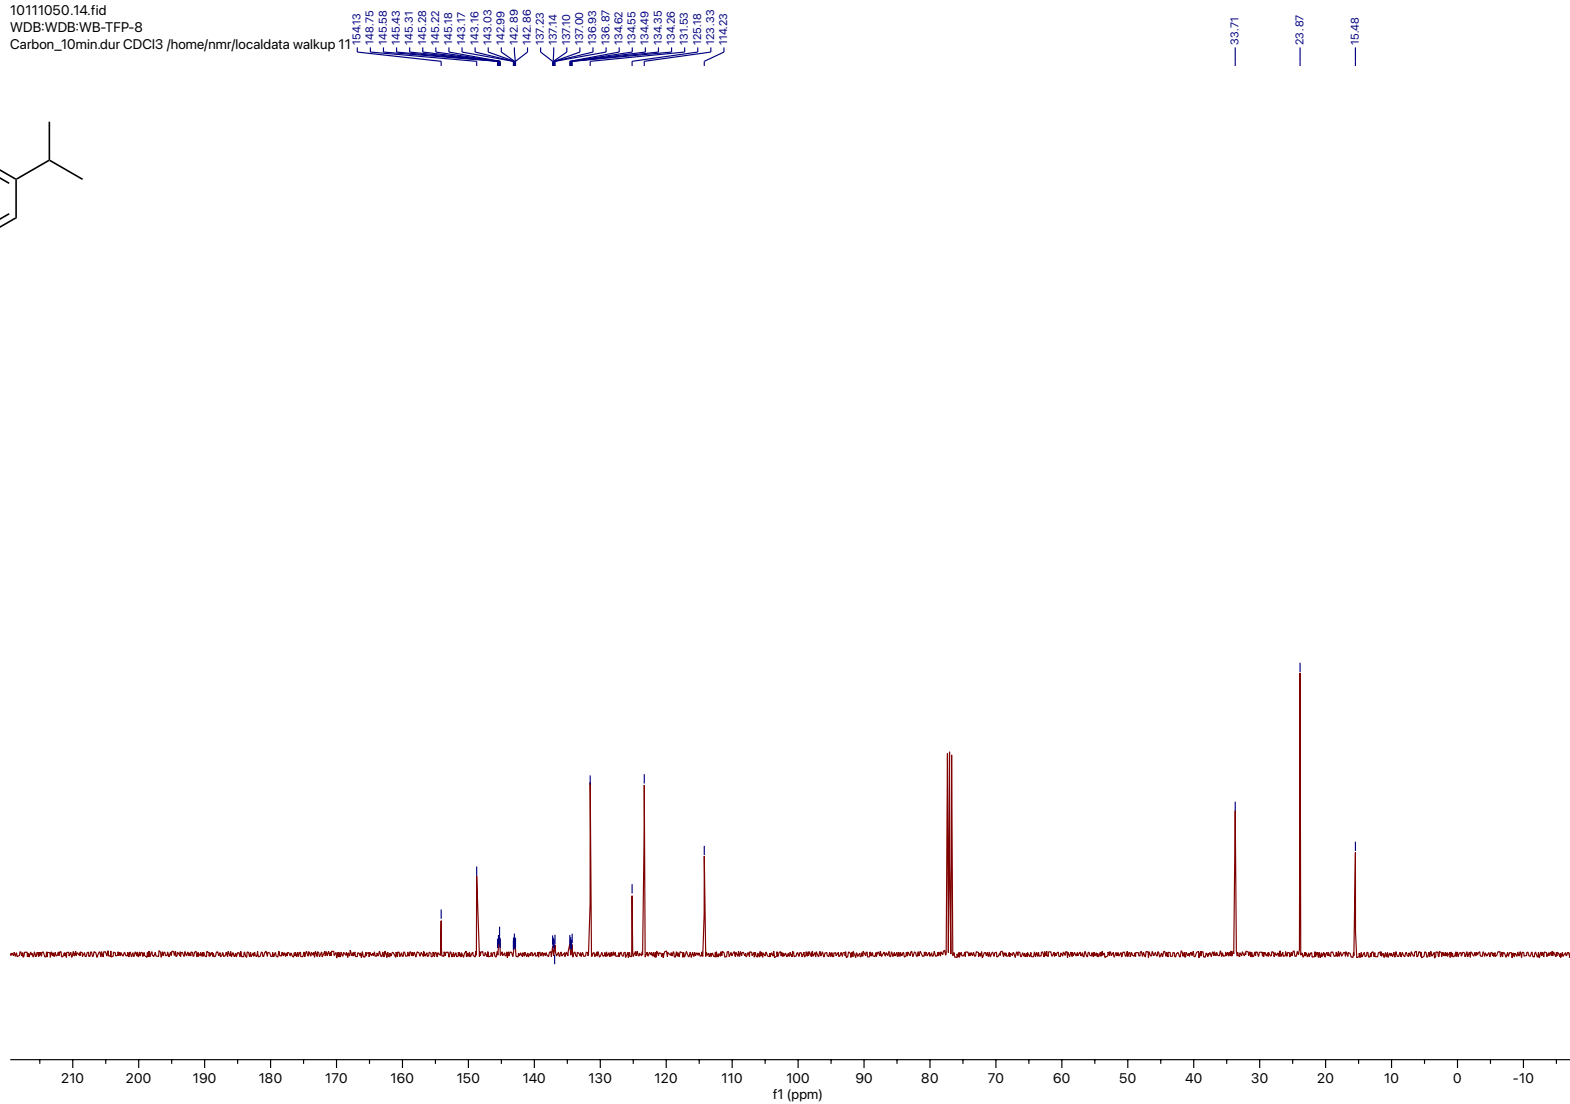

Figure S95.  $^{13}\text{C}\{^1\text{H}\}$  NMR spectrum of **35** recorded at 101 MHz in  $\text{CDCl}_3$ .

01123844.10.fid  
WDB:WDB:WB-CarvacrolTCP  
Proton1.icon CDCl3 /home/nmr/localdata/walkup 5

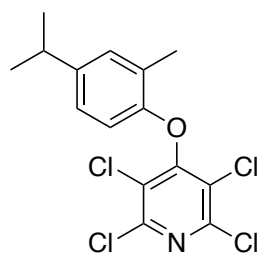

**36**

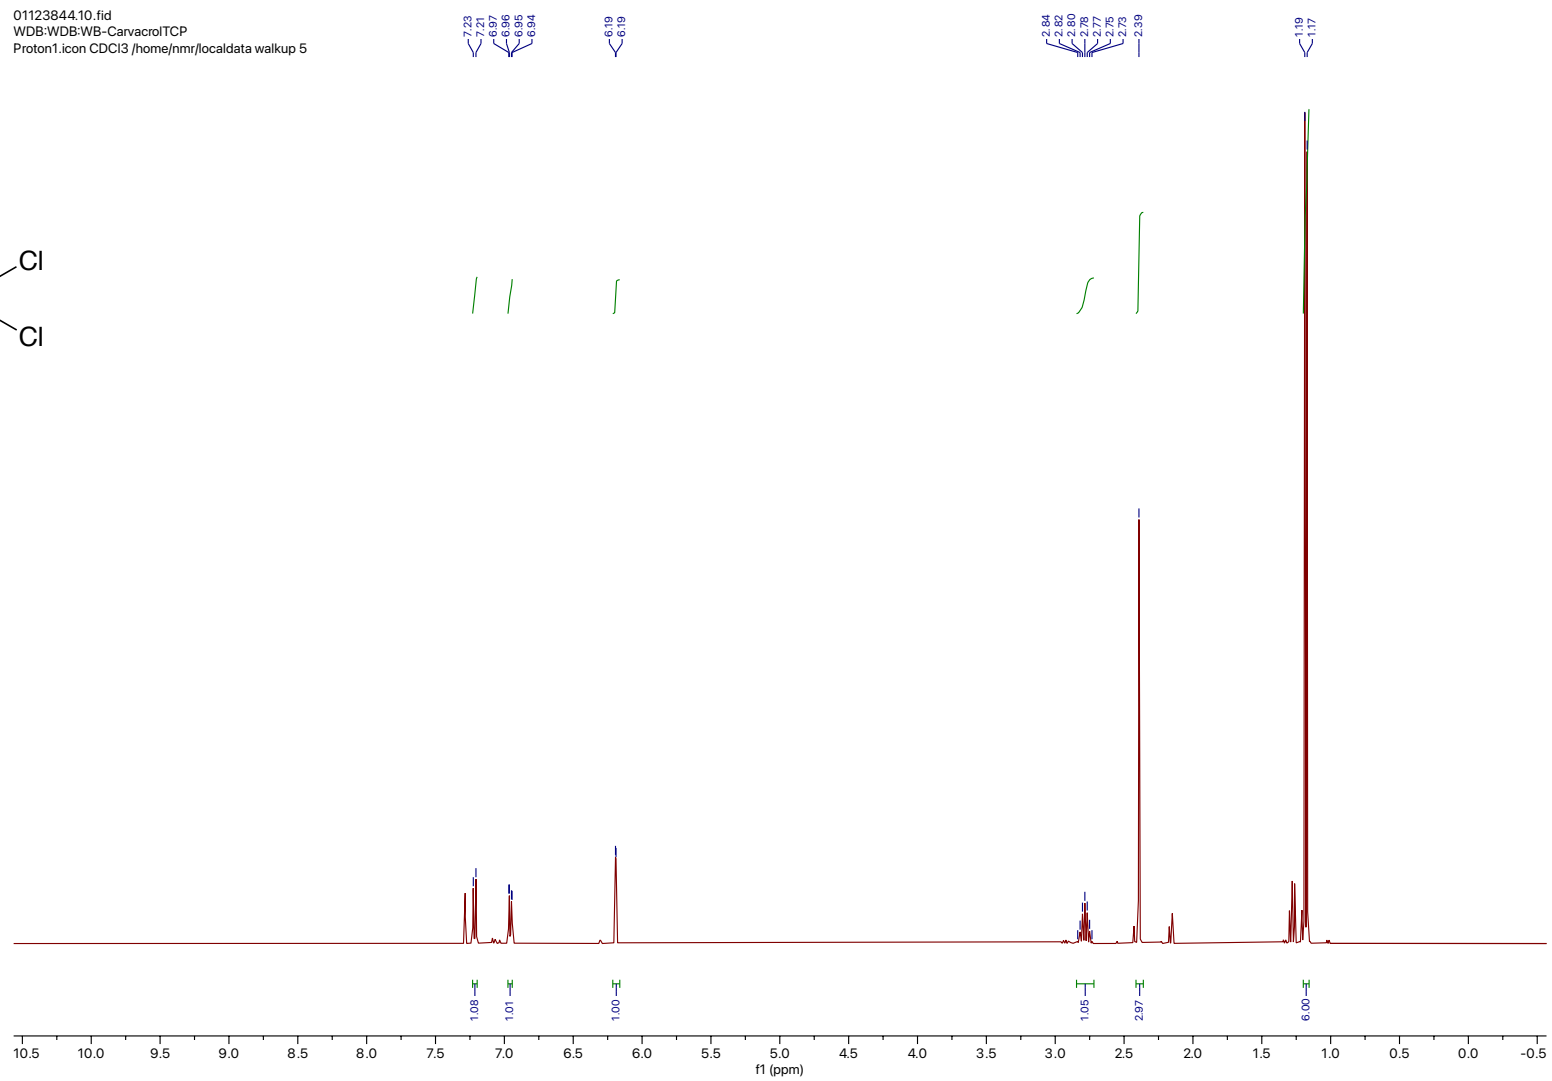

Figure S96. <sup>1</sup>H NMR spectrum of **36** recorded at 400 MHz in CDCl<sub>3</sub>.

01123844.11.fid  
WDB:WDB:WB-CarvacrolTCP  
Carbon.dur CDCl3 /home/nmr/localdata walkup 5

158.11  
153.41  
148.50  
147.16  
131.63  
125.23  
124.43  
121.57  
111.47

33.72  
23.92  
15.80



36

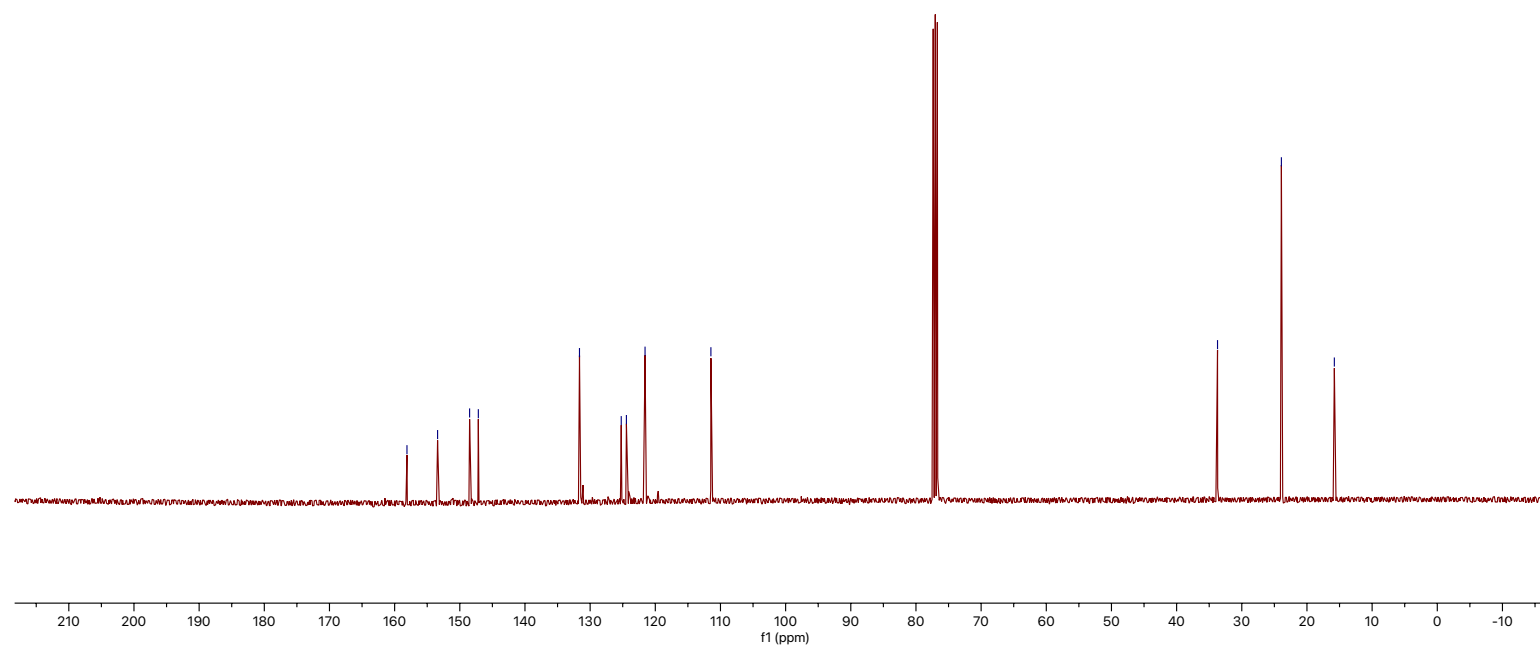

Figure S97.  $^{13}\text{C}\{^1\text{H}\}$  NMR spectrum of **36** recorded at 101 MHz in  $\text{CDCl}_3$ .

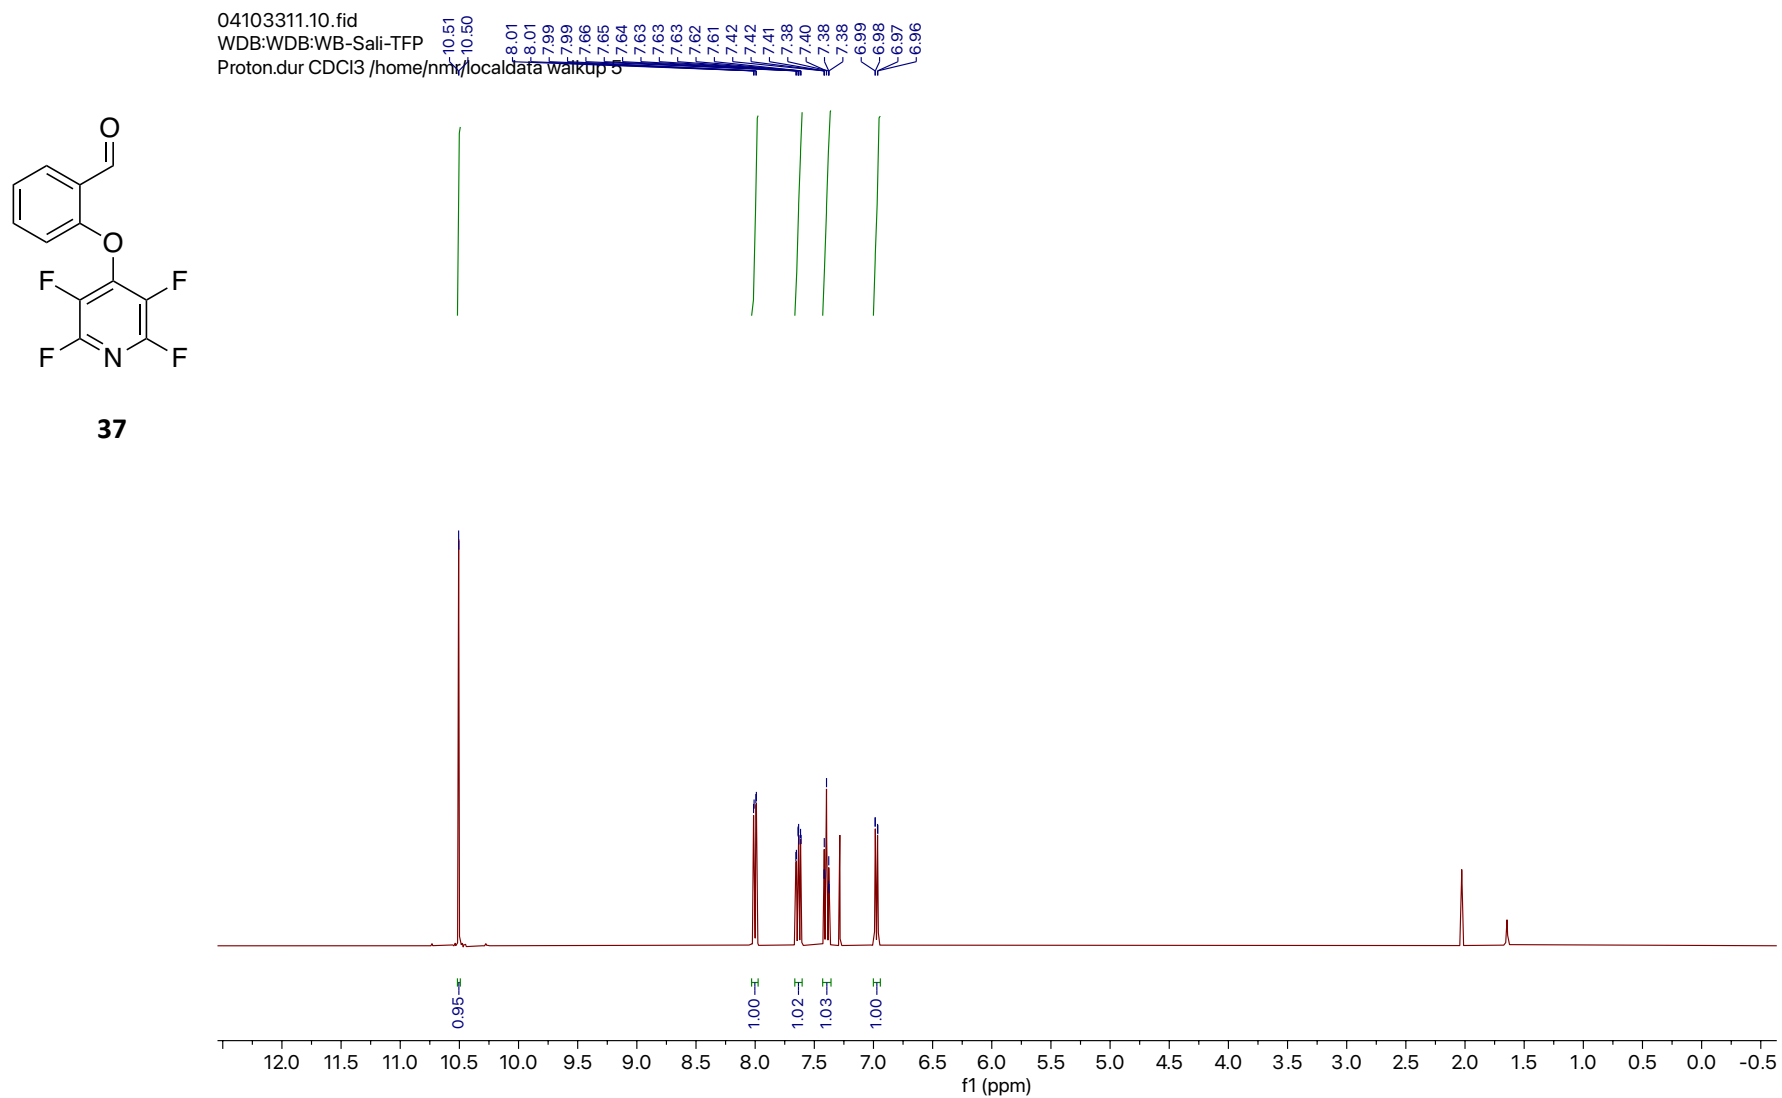

**Figure S98.**  $^1\text{H}$  NMR spectrum of **37** recorded at 400 MHz in  $\text{CDCl}_3$ .

04103311.13.fid  
WDB:WDB:WB-Sali-TFP  
F19\_limits\_dec.dur CDCI3 /home/nm/joc/aldata walkup 5

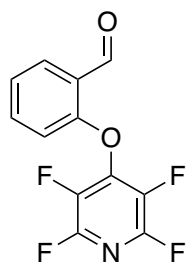

**37**

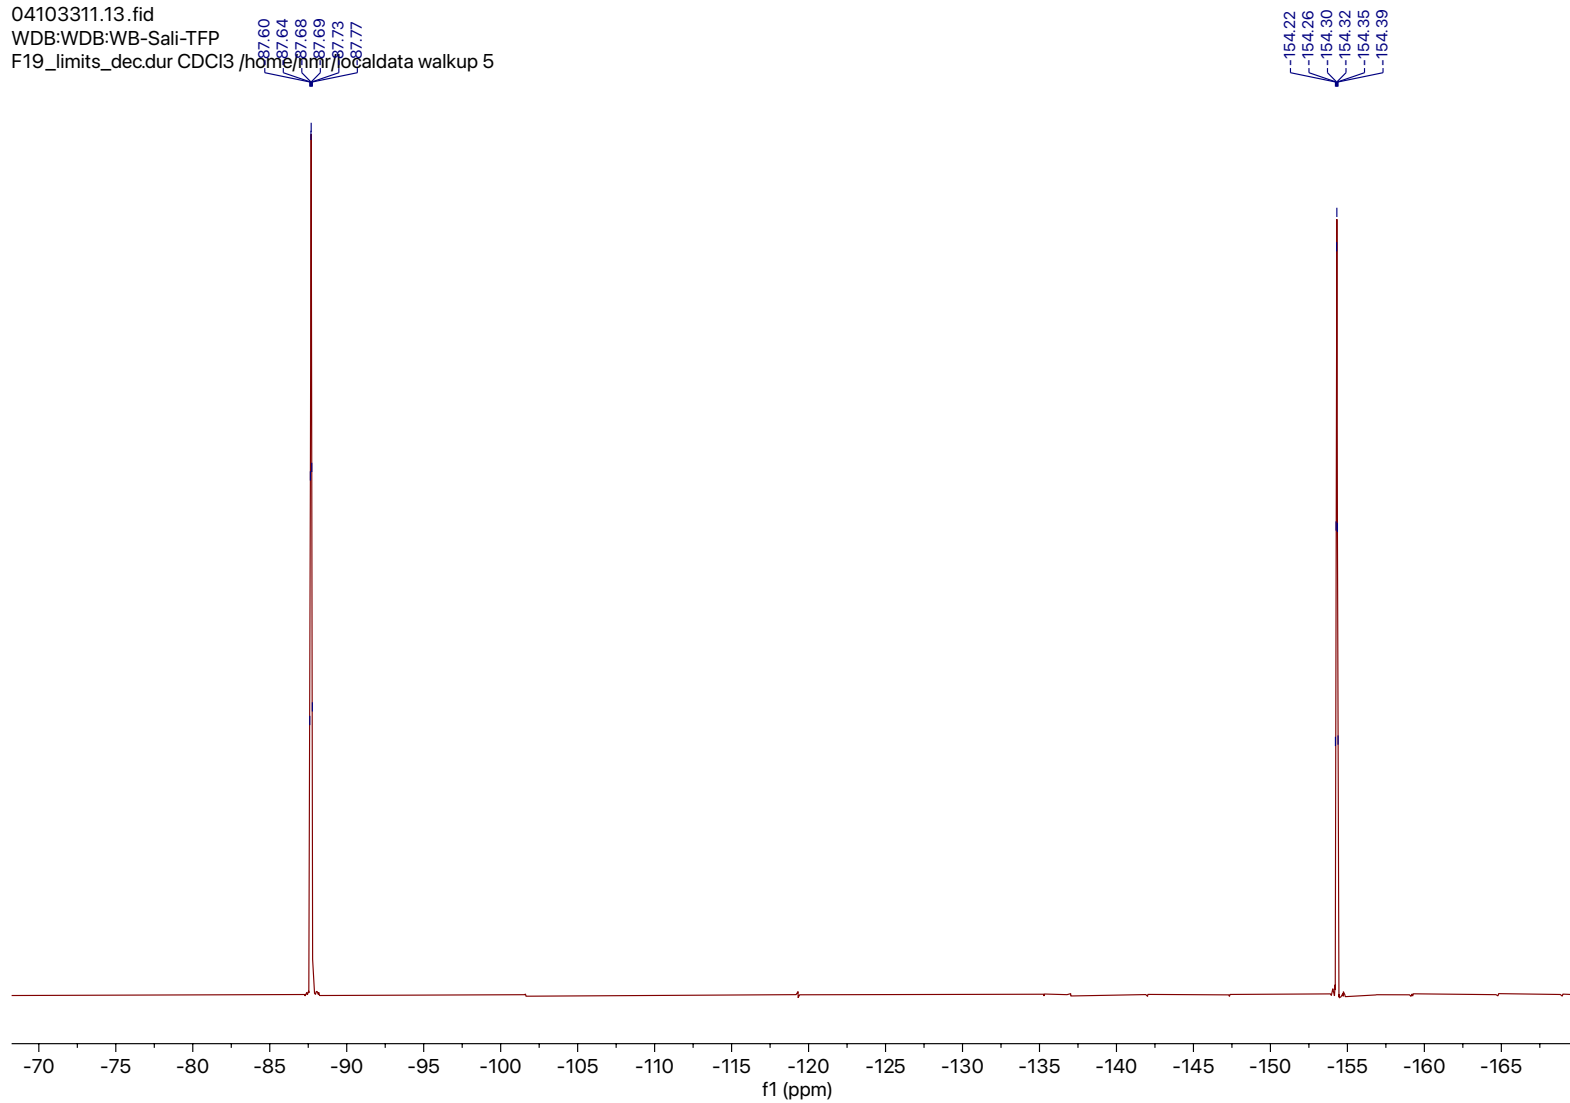

**Figure S99.**  $^{19}\text{F}\{^1\text{H}\}$  NMR spectrum of **37** recorded at 376 MHz in  $\text{CDCl}_3$ .

04103311.14.fid  
WDB:WDB:WB-Sali-TFP  
Carbon.dur CDCl3 /home/nmr/local/data/walk

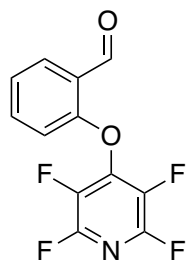

**37**

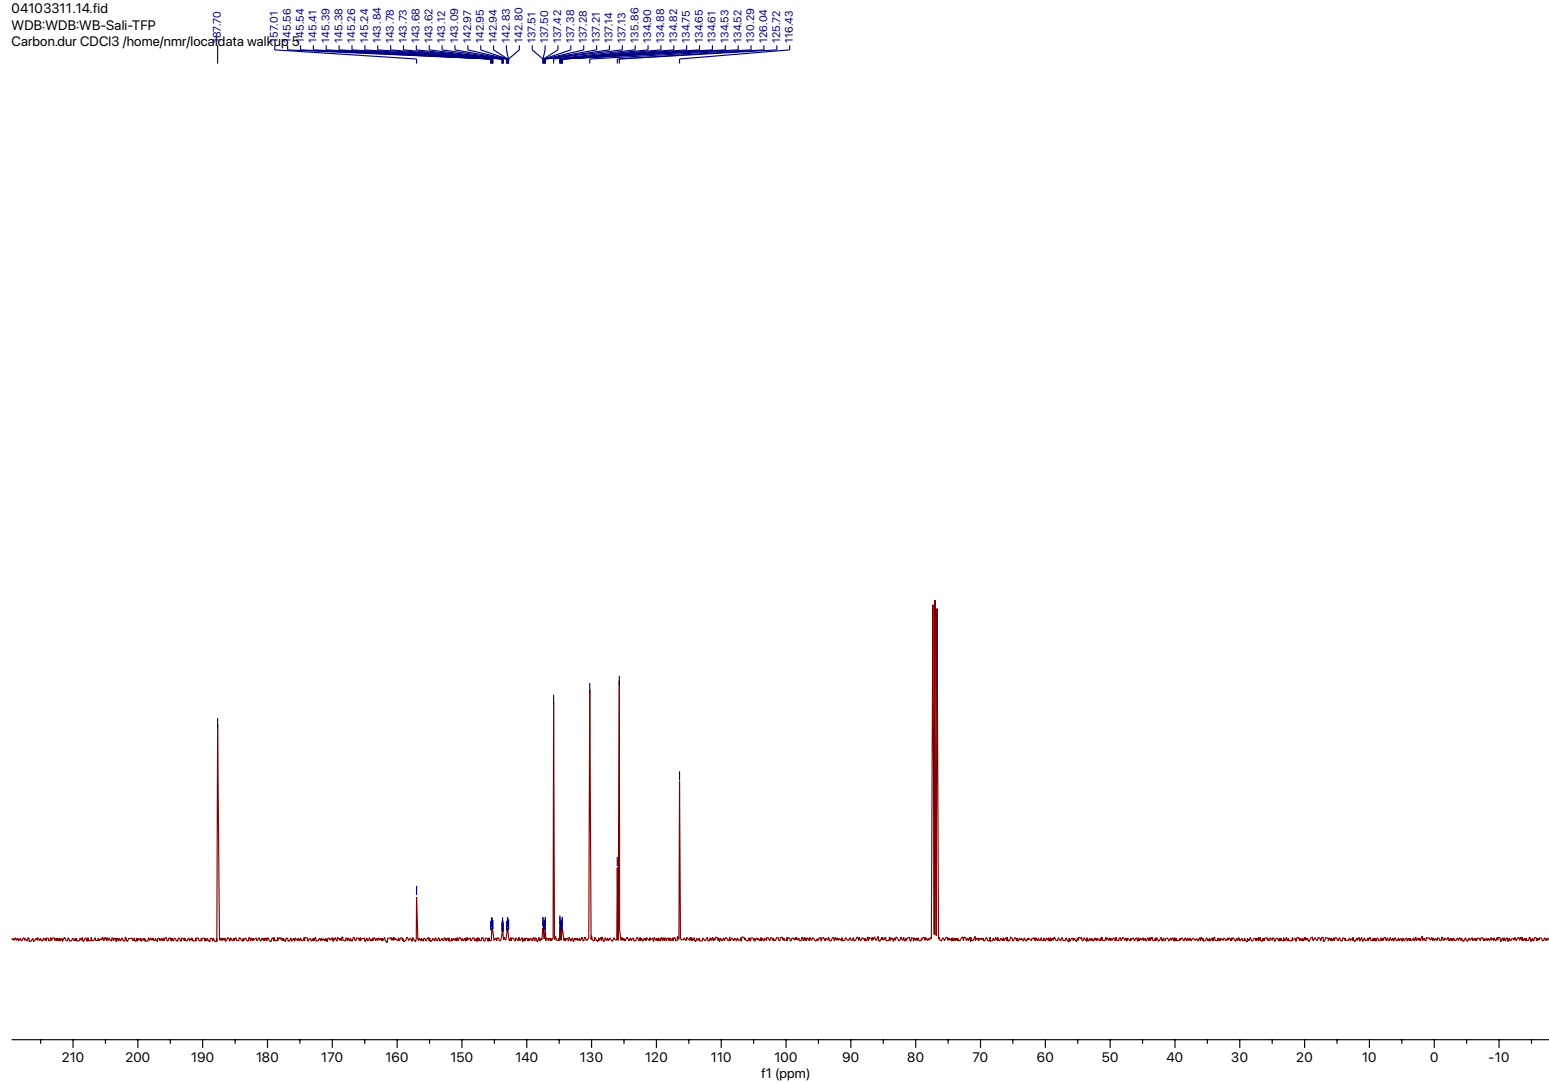

Figure S100.  $^{13}\text{C}\{^1\text{H}\}$  NMR spectrum of **37** recorded at 101 MHz in  $\text{CDCl}_3$ .

08162020.10.fid  
WDB:WDB:WB10-112  
Proton.dur CDCl3 /home/nmr/localdata/walkup/20

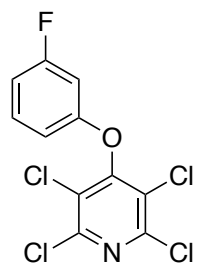

**38**

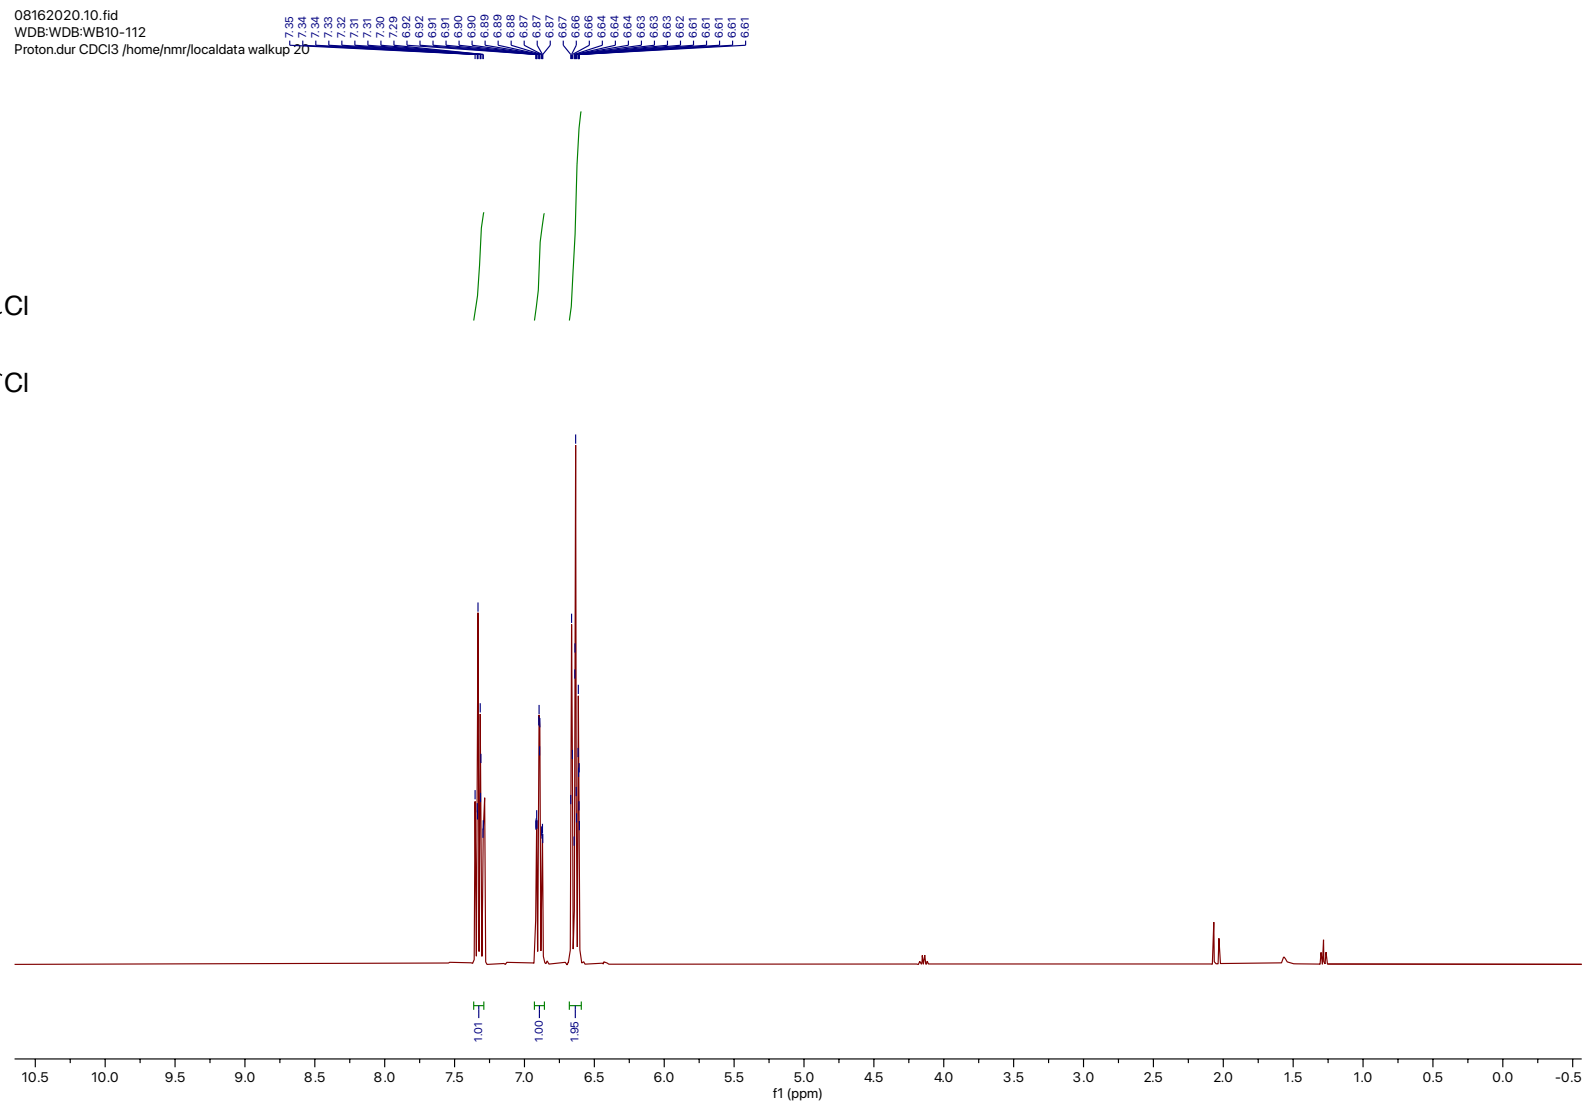

**Figure S101.** <sup>1</sup>H NMR spectrum of **38** recorded at 400 MHz in CDCl<sub>3</sub>.

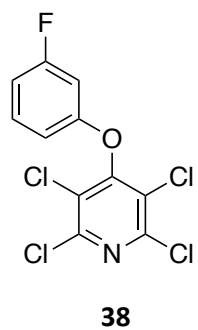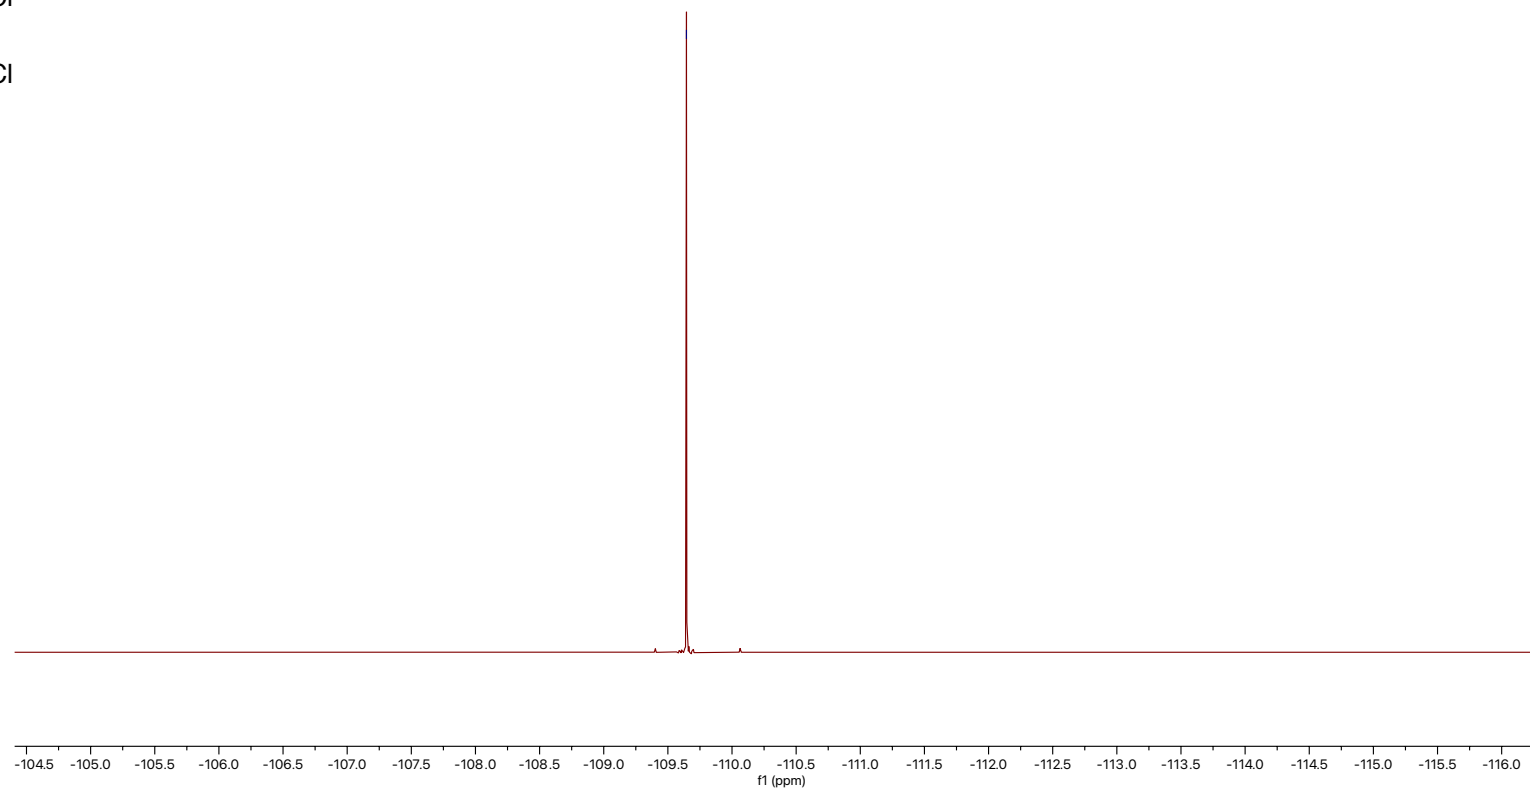

**Figure S102.**  $^{19}\text{F}\{^1\text{H}\}$  NMR spectrum of **38** recorded at 376 MHz in  $\text{CDCl}_3$ .

08162020.14.fid  
WDB:WDB:WB10-112  
Carbon\_10min.dur CDCI3 /home/nmr/localdata/walkup 20

164.78  
162.31  
156.79  
156.01  
155.90  
147.36

131.00  
130.90  
125.53

111.29  
111.08  
110.93  
110.89  
104.06  
103.80

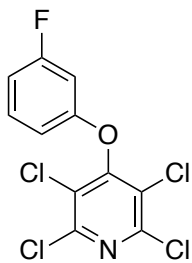

**38**

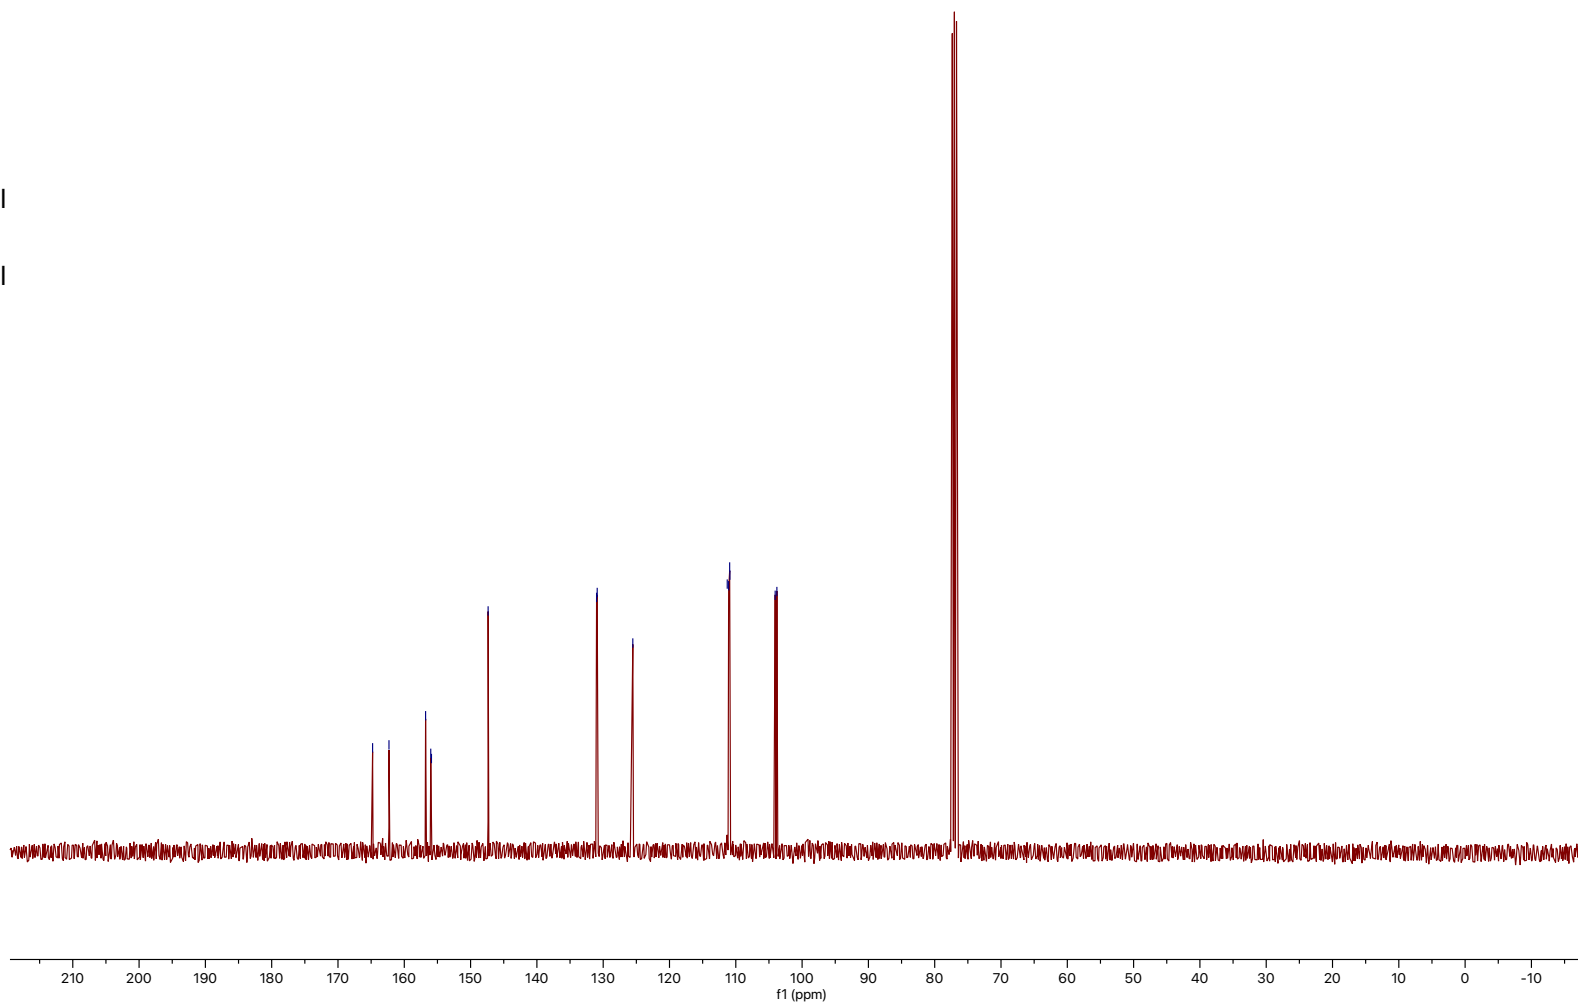

**Figure S103.**  $^{13}\text{C}\{^1\text{H}\}$  NMR spectrum of **38** recorded at 101 MHz in  $\text{CDCl}_3$ .

02155831.10.fid  
WDB:WDB:WB10-103  
Proton.dur CDCl3 /home/nmr/localdata/walkup 45

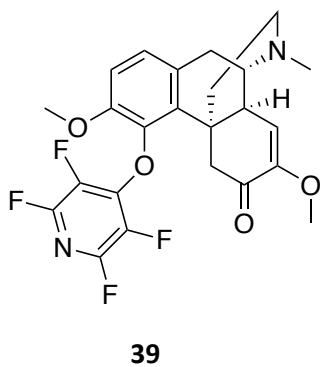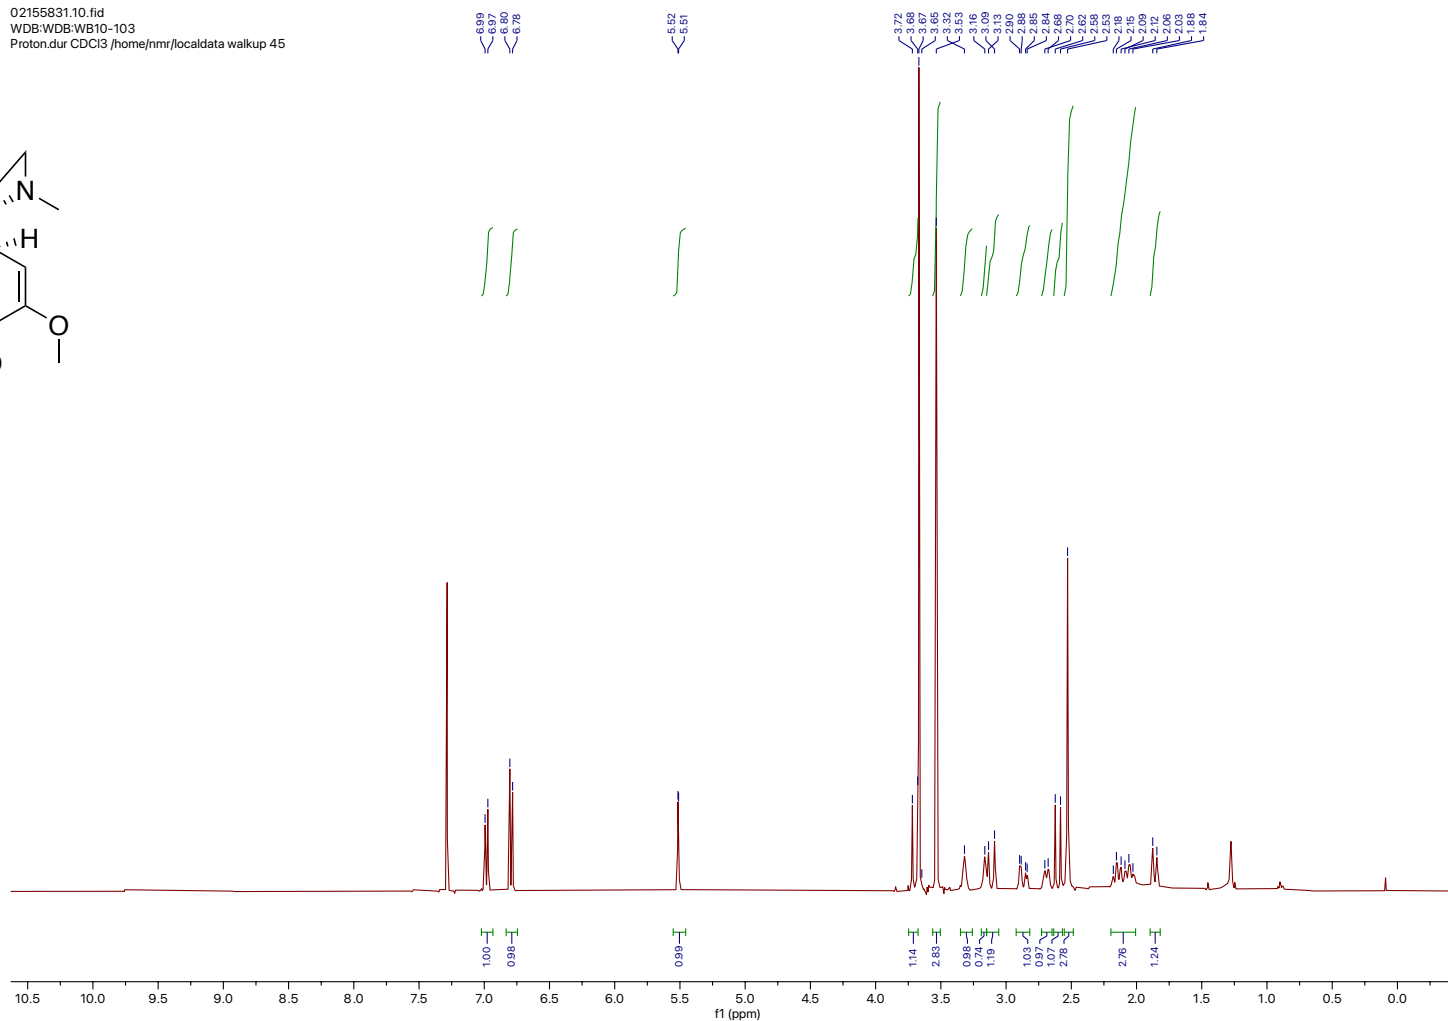

**Figure S104.**  $^1\text{H}$  NMR spectrum of **39** recorded at 700 MHz in  $\text{CDCl}_3$ .

02155831.13.fid  
WDB:WDB:WB10-103  
F19\_limits\_dec.dur CDCBS home/fin/focaldata/walkup 45

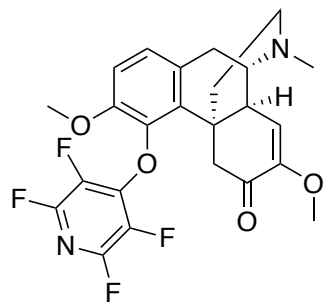

39

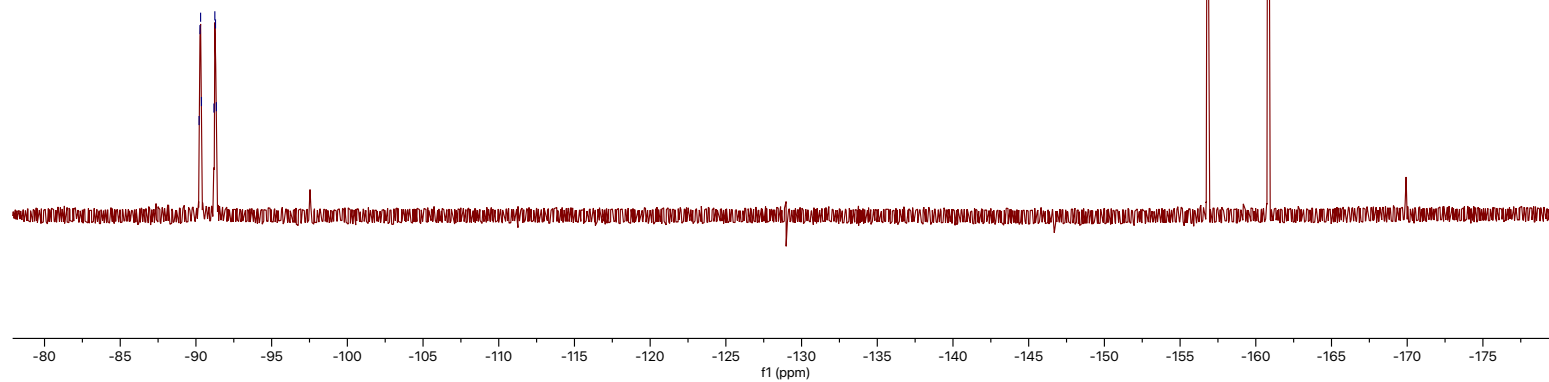

Figure S105.  $^{19}\text{F}\{^1\text{H}\}$  NMR spectrum of **39** recorded at 376 MHz in  $\text{CDCl}_3$ .

12125647.11.fid  
WDB:WDB:WB-SinOTFP  
Carbon.dur CDCI3 /home/nmr/localdata/walkup 13

152.67  
149.18  
142.76  
130.31  
128.67  
125.44  
114.69  
110.78

56.36  
55.97  
54.97  
50.34  
46.74  
45.81  
42.89  
41.03  
36.90  
24.29  
22.87

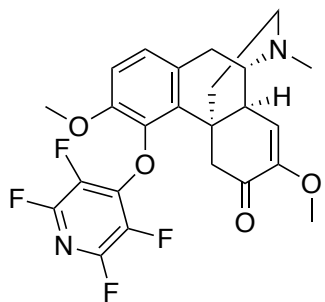

39

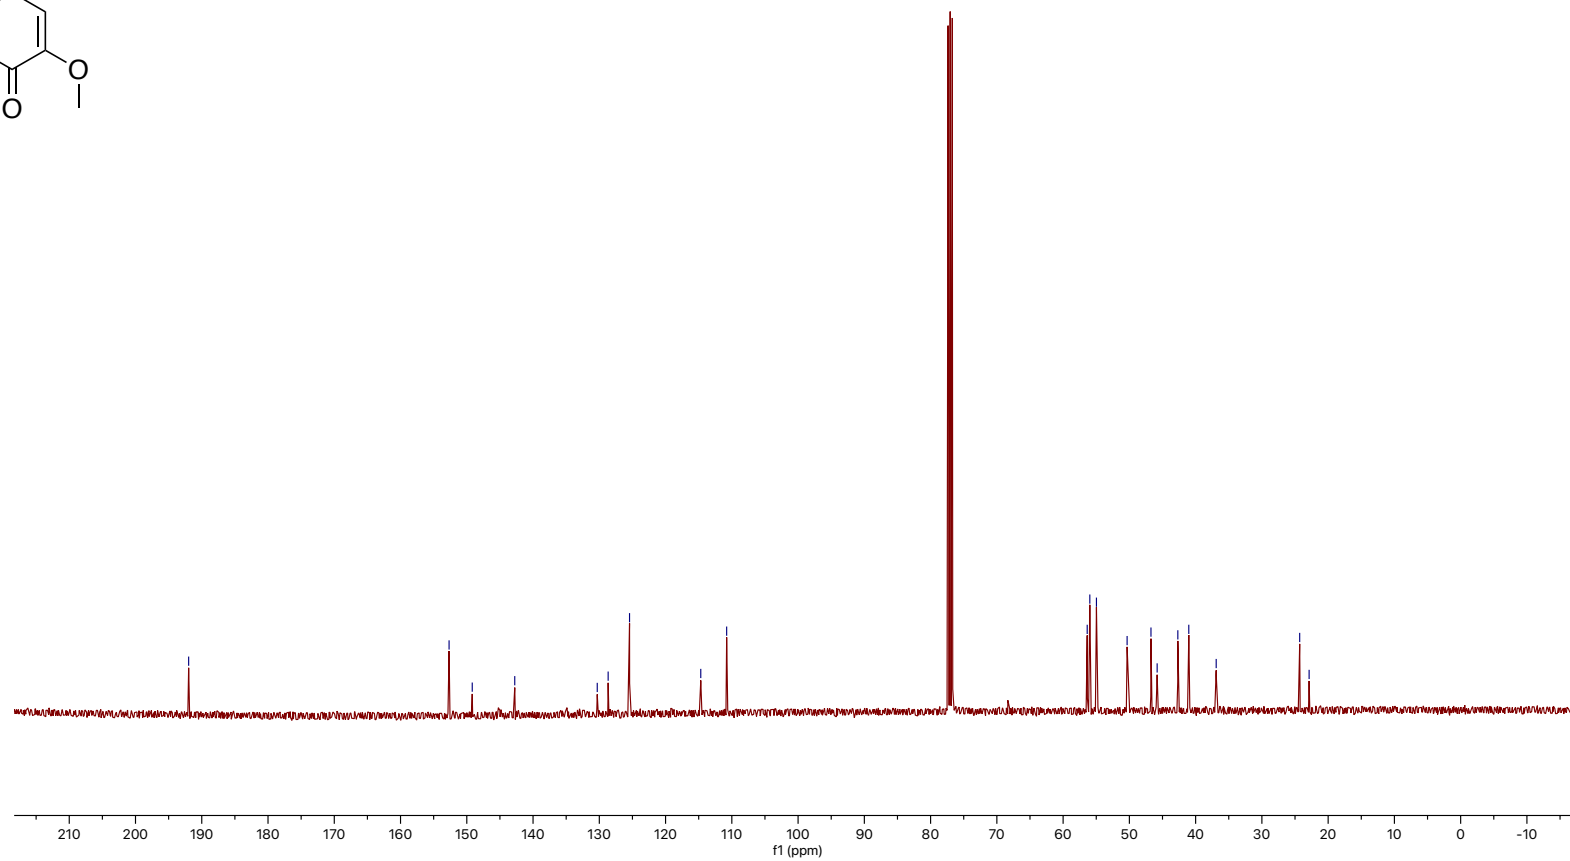

Figure S106.  $^{13}\text{C}\{^1\text{H}\}$  NMR spectrum of **39** recorded at 101 MHz in  $\text{CDCl}_3$ .

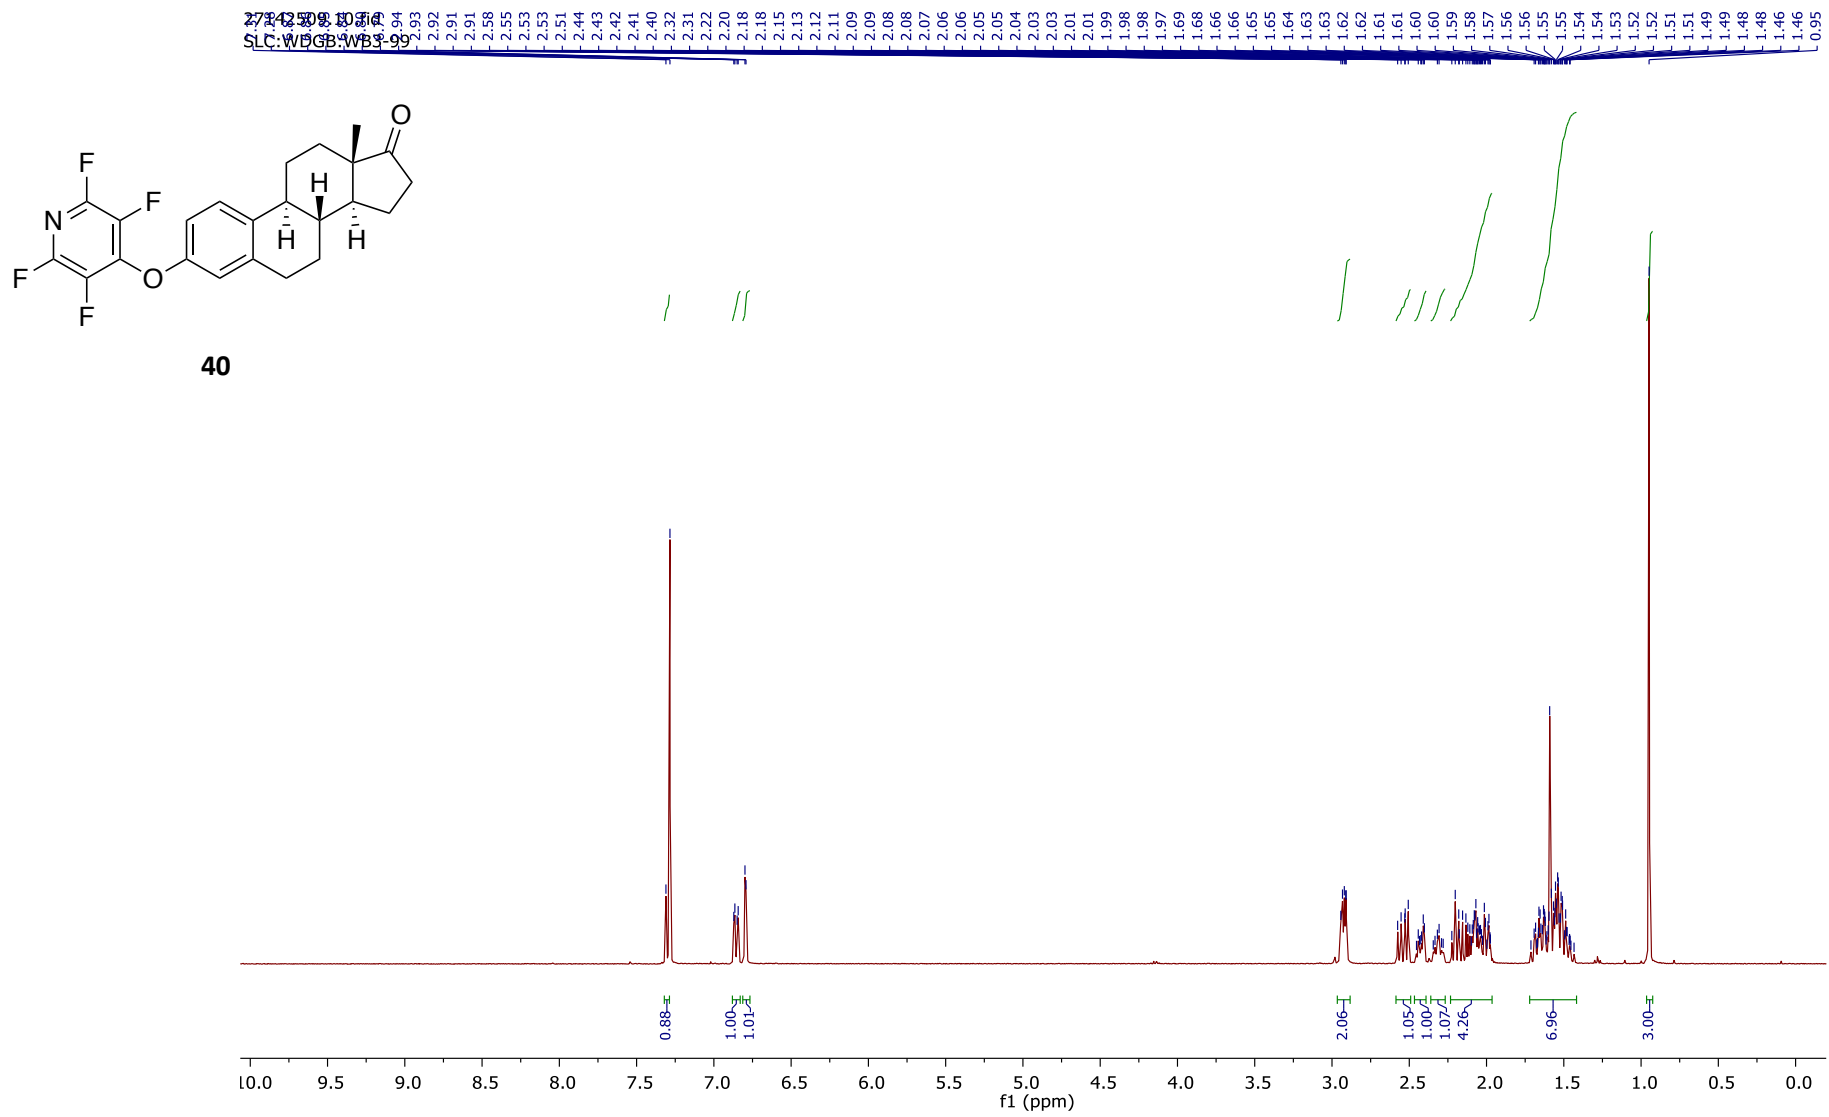

Figure S107.  $^1\text{H}$  NMR spectrum of **40** recorded at 400 MHz in  $\text{CDCl}_3$ .

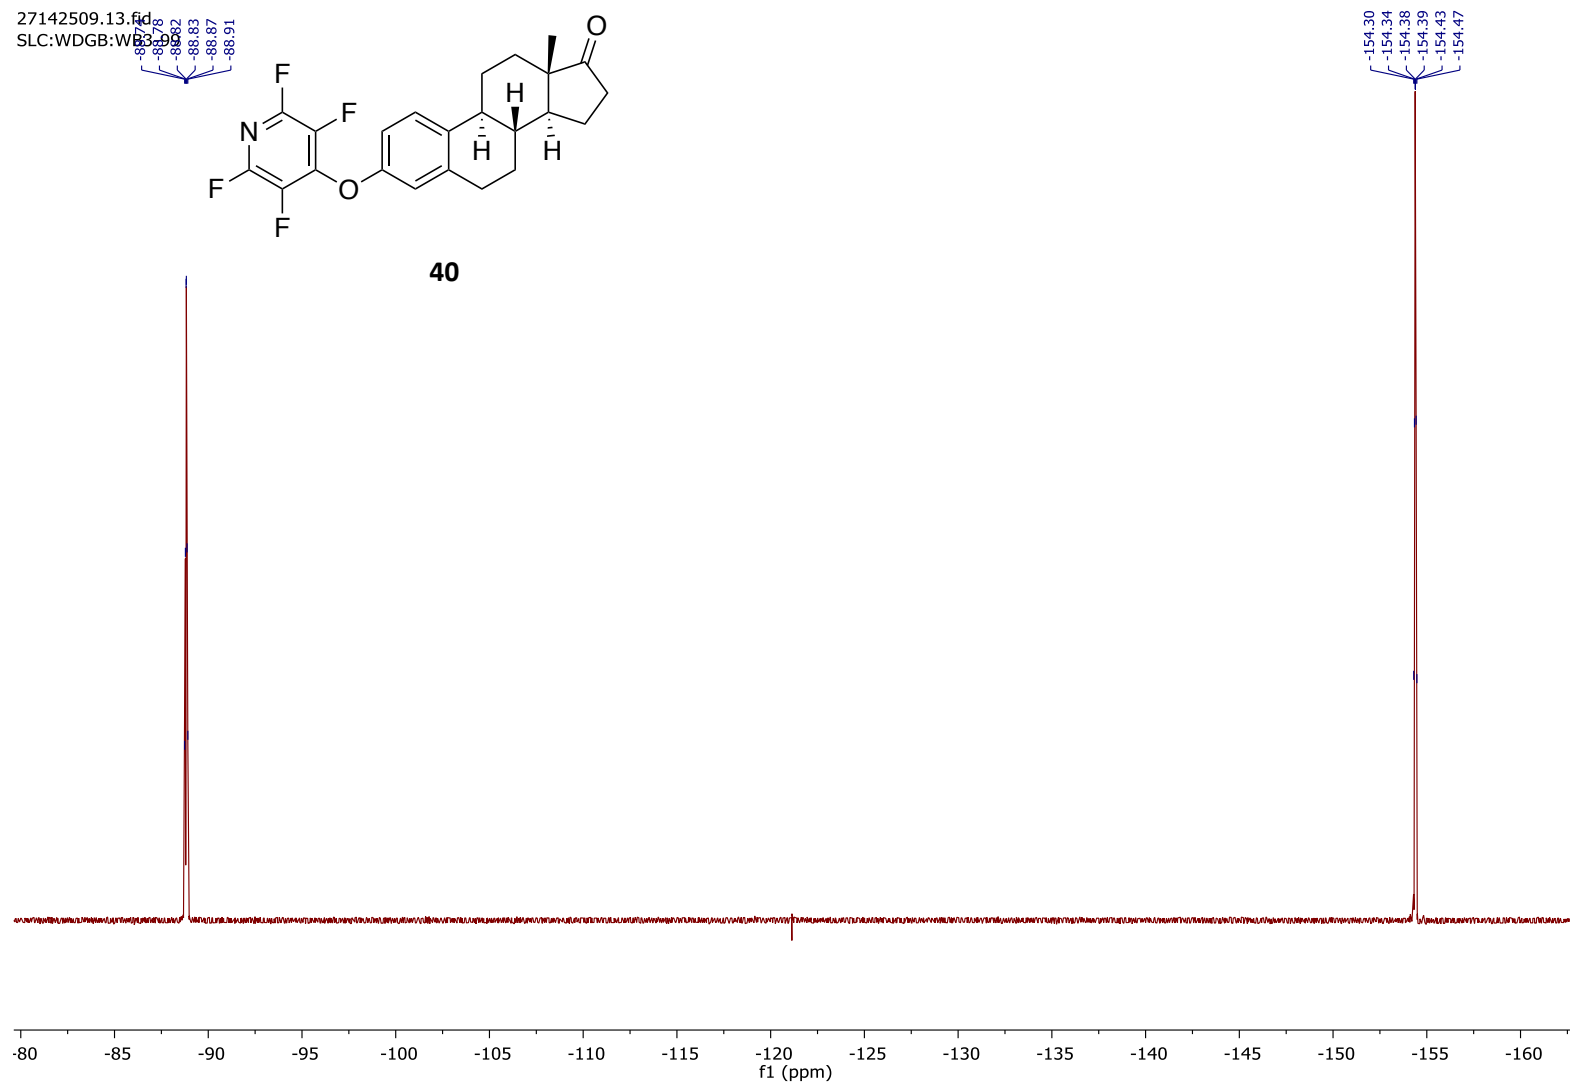

Figure S108.  $^{19}\text{F}\{^1\text{H}\}$  NMR spectrum of **40** recorded at 376 MHz in  $\text{CDCl}_3$ .

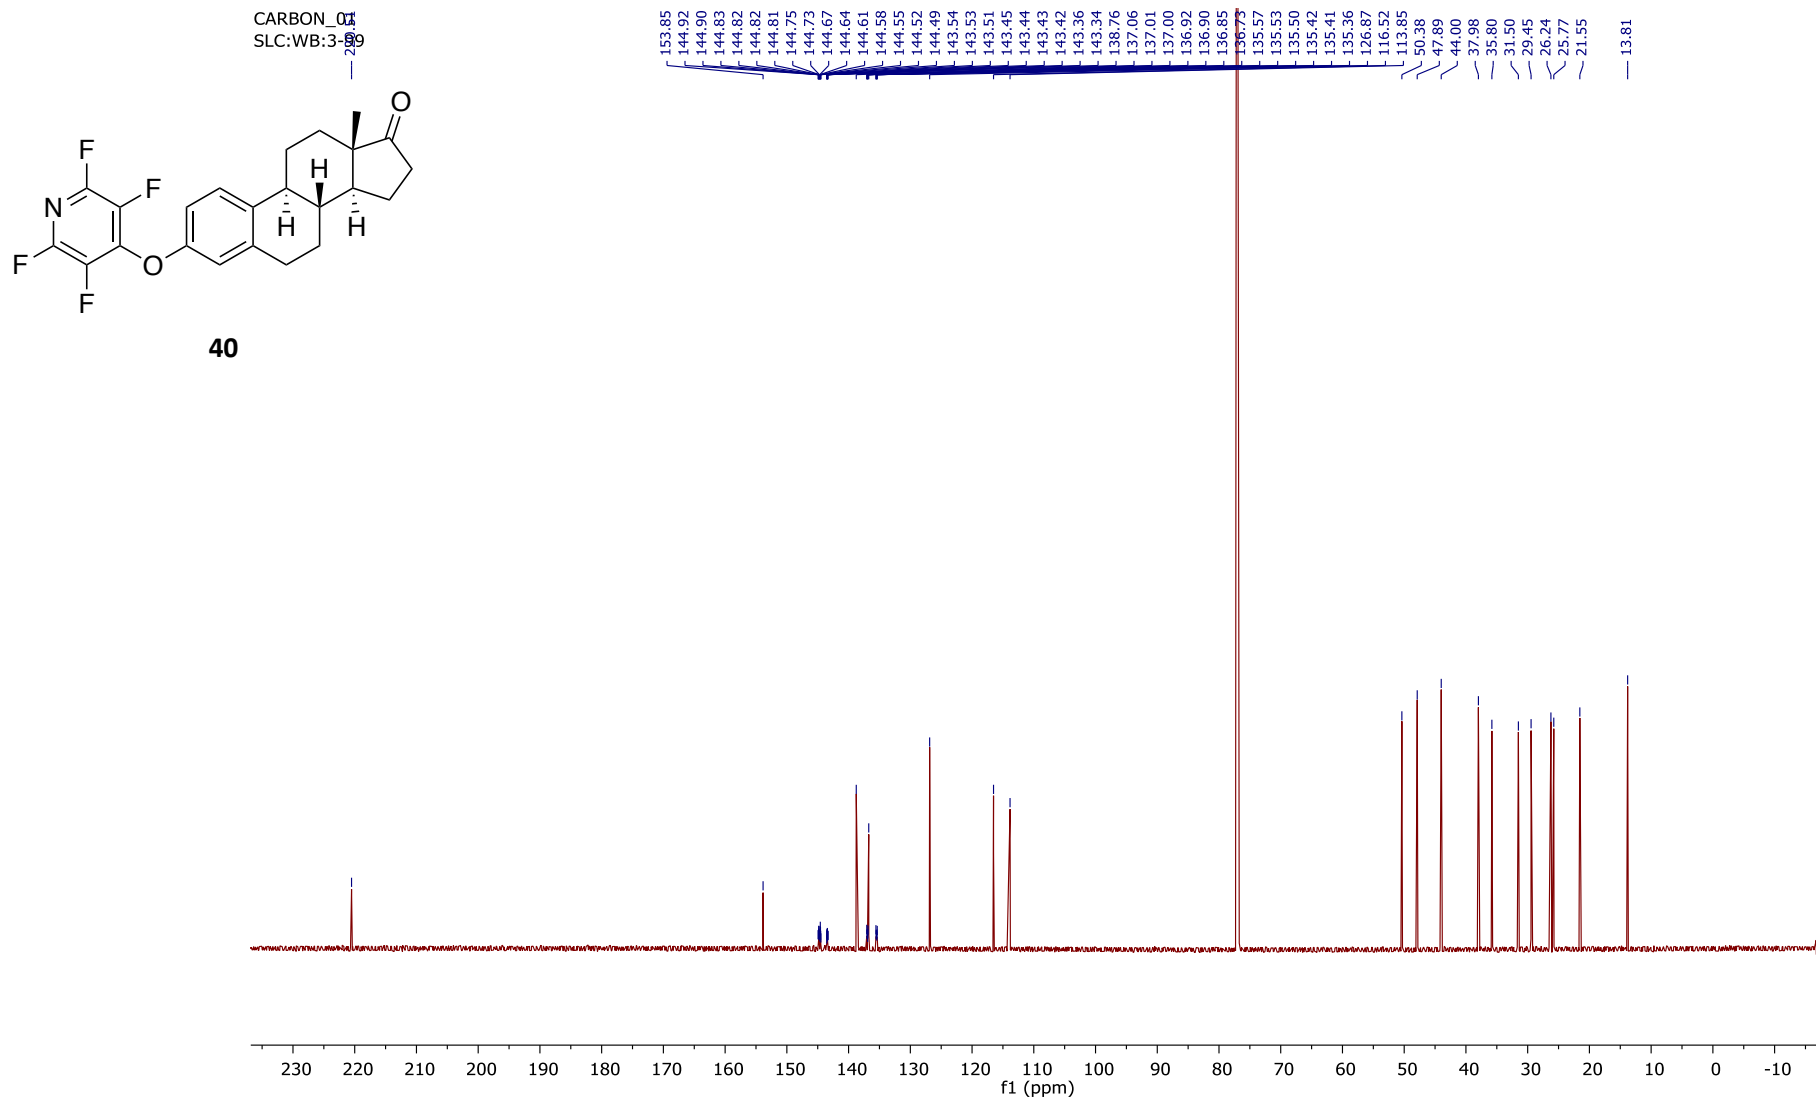

Figure S109.  $^{13}\text{C}\{^1\text{H}\}$  NMR spectrum of **40** recorded at 176 MHz in  $\text{CDCl}_3$ .

11134115.10.fid  
WDB:WDB:WB-EstroneTCP  
Proton.dur CDCI3 /home/nmr/localdata/walkup 20

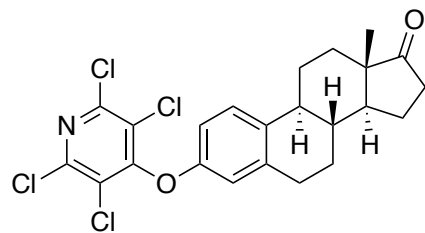

**41**

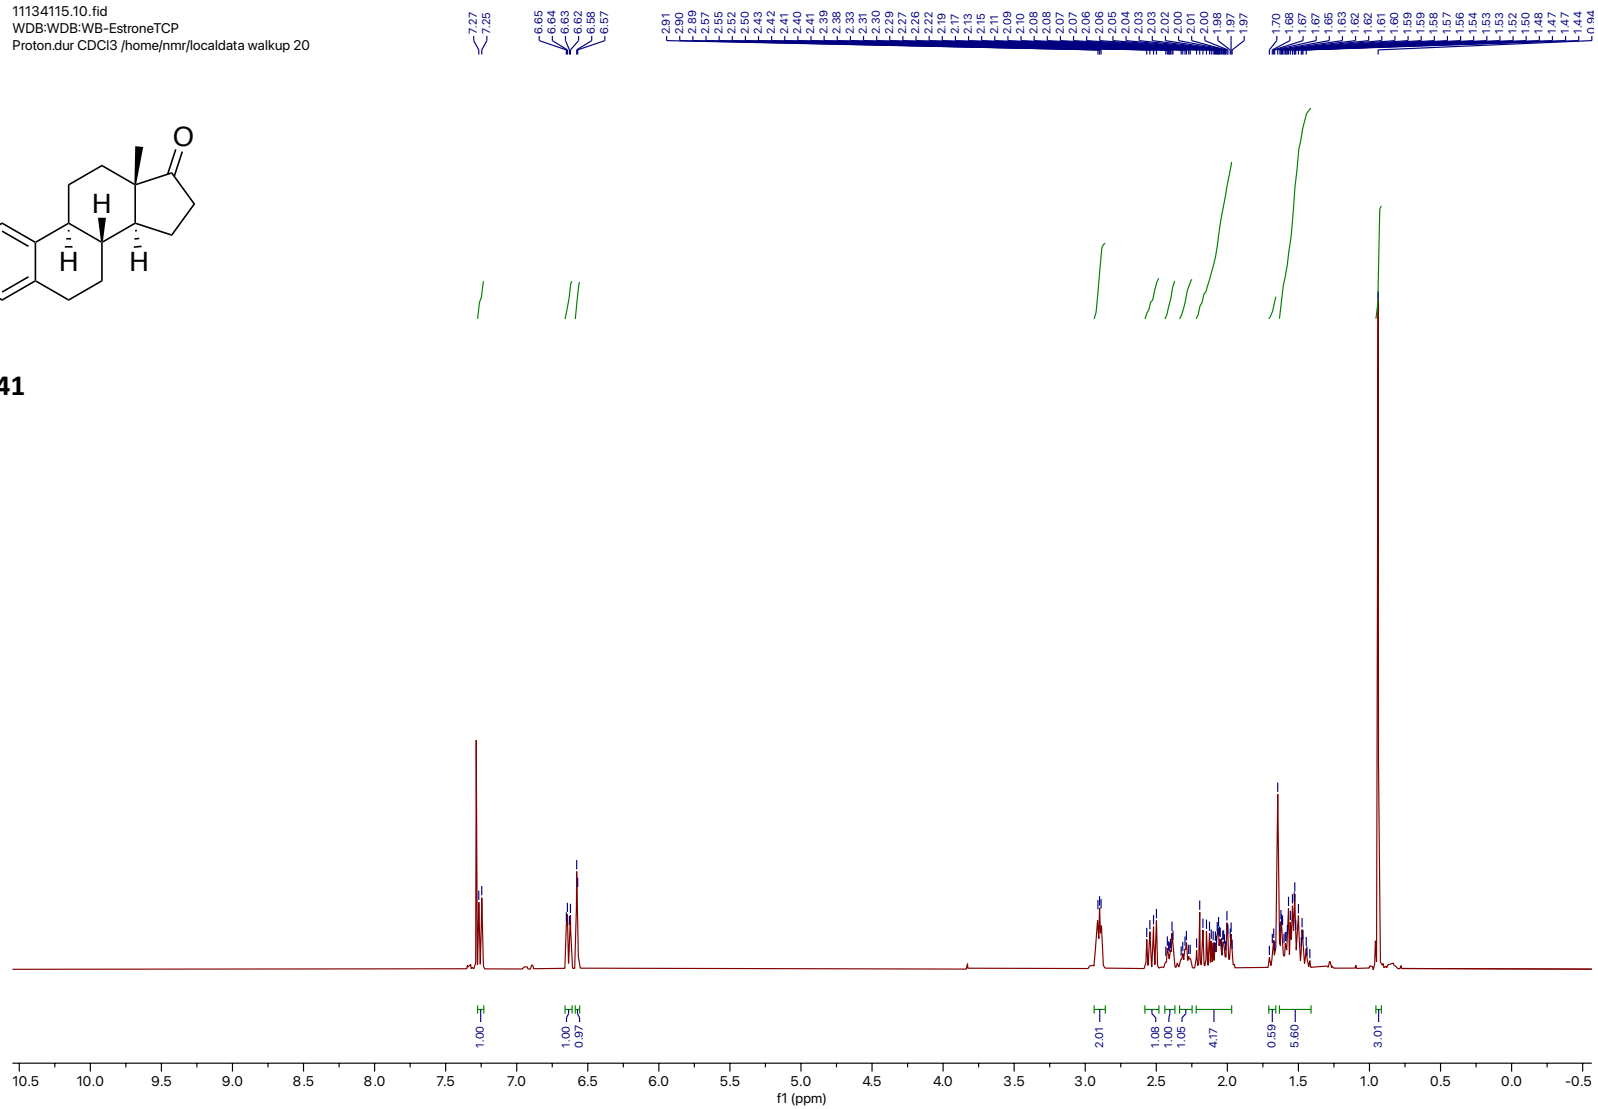

Figure S110. <sup>1</sup>H NMR spectrum of **41** recorded at 400 MHz in CDCl<sub>3</sub>.

11134115.11.fid  
WDB:WDB:WB-EstroneTCP  
Carbon.dur CDCl3 /home/nmr/localdata walkup 20

157.50  
153.26  
147.16  
138.80  
135.59  
126.93  
125.71  
115.24  
112.68

50.43  
47.95  
44.02  
38.05  
35.86  
31.65  
29.54  
26.32  
25.79  
21.60  
13.86

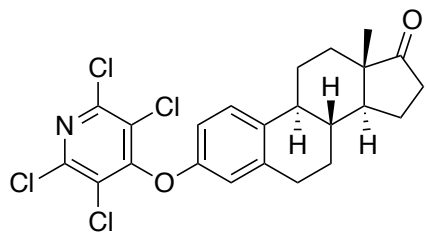

41

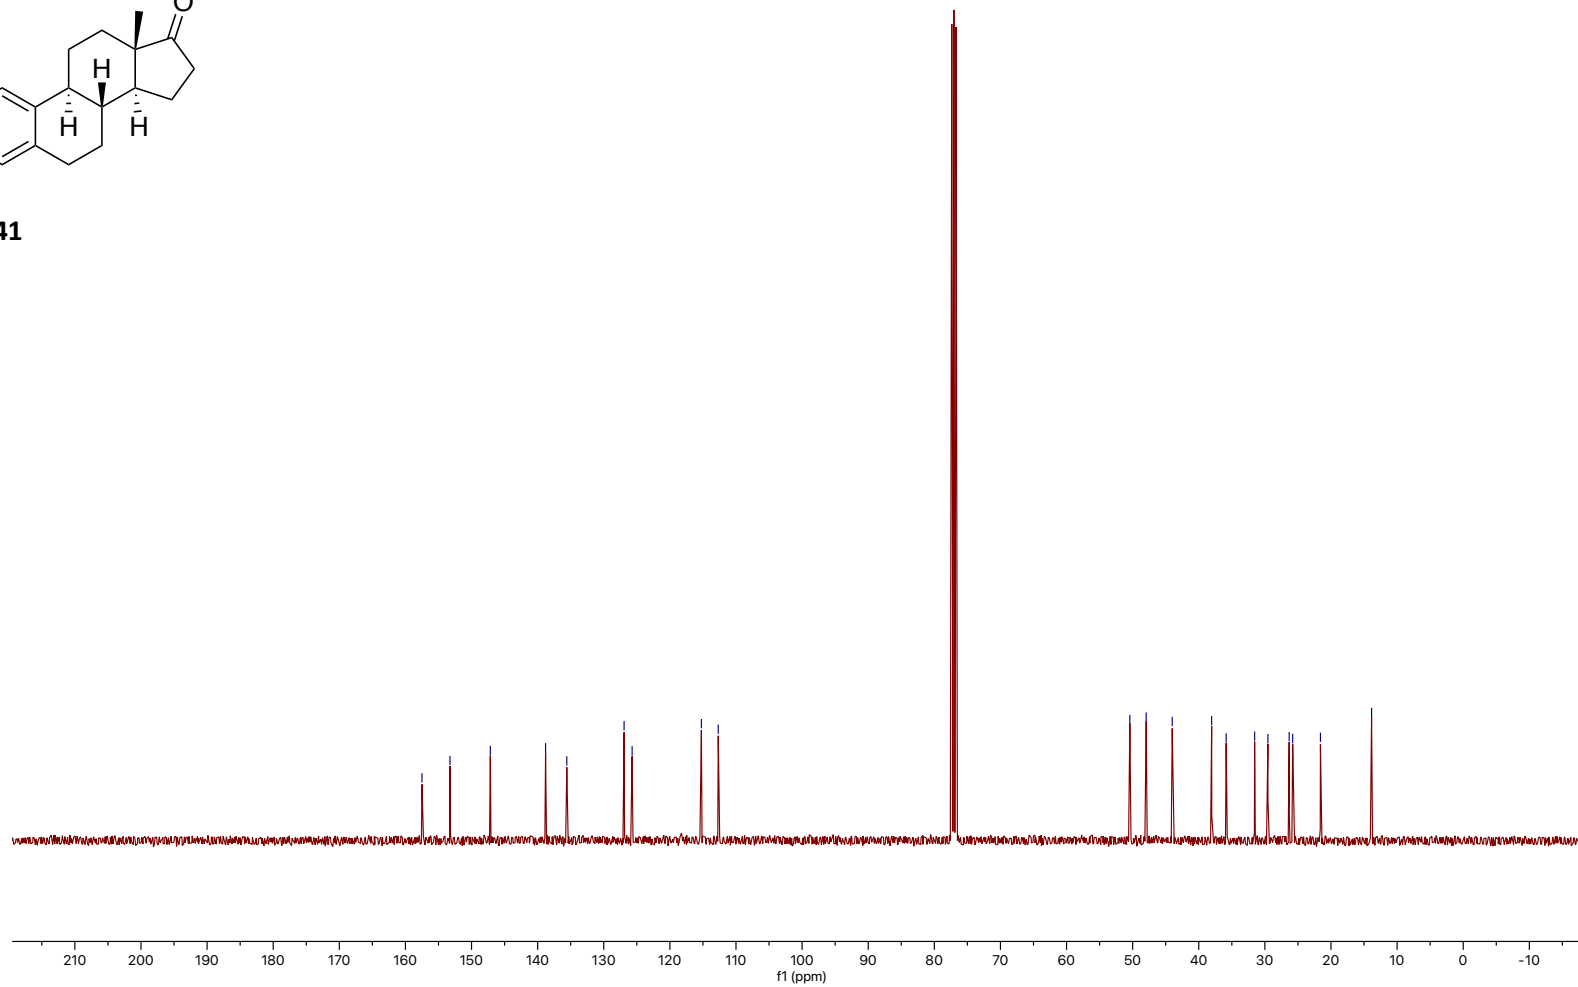

Figure S111.  $^{13}\text{C}\{^1\text{H}\}$  NMR spectrum of **41** recorded at 101 MHz in  $\text{CDCl}_3$ .

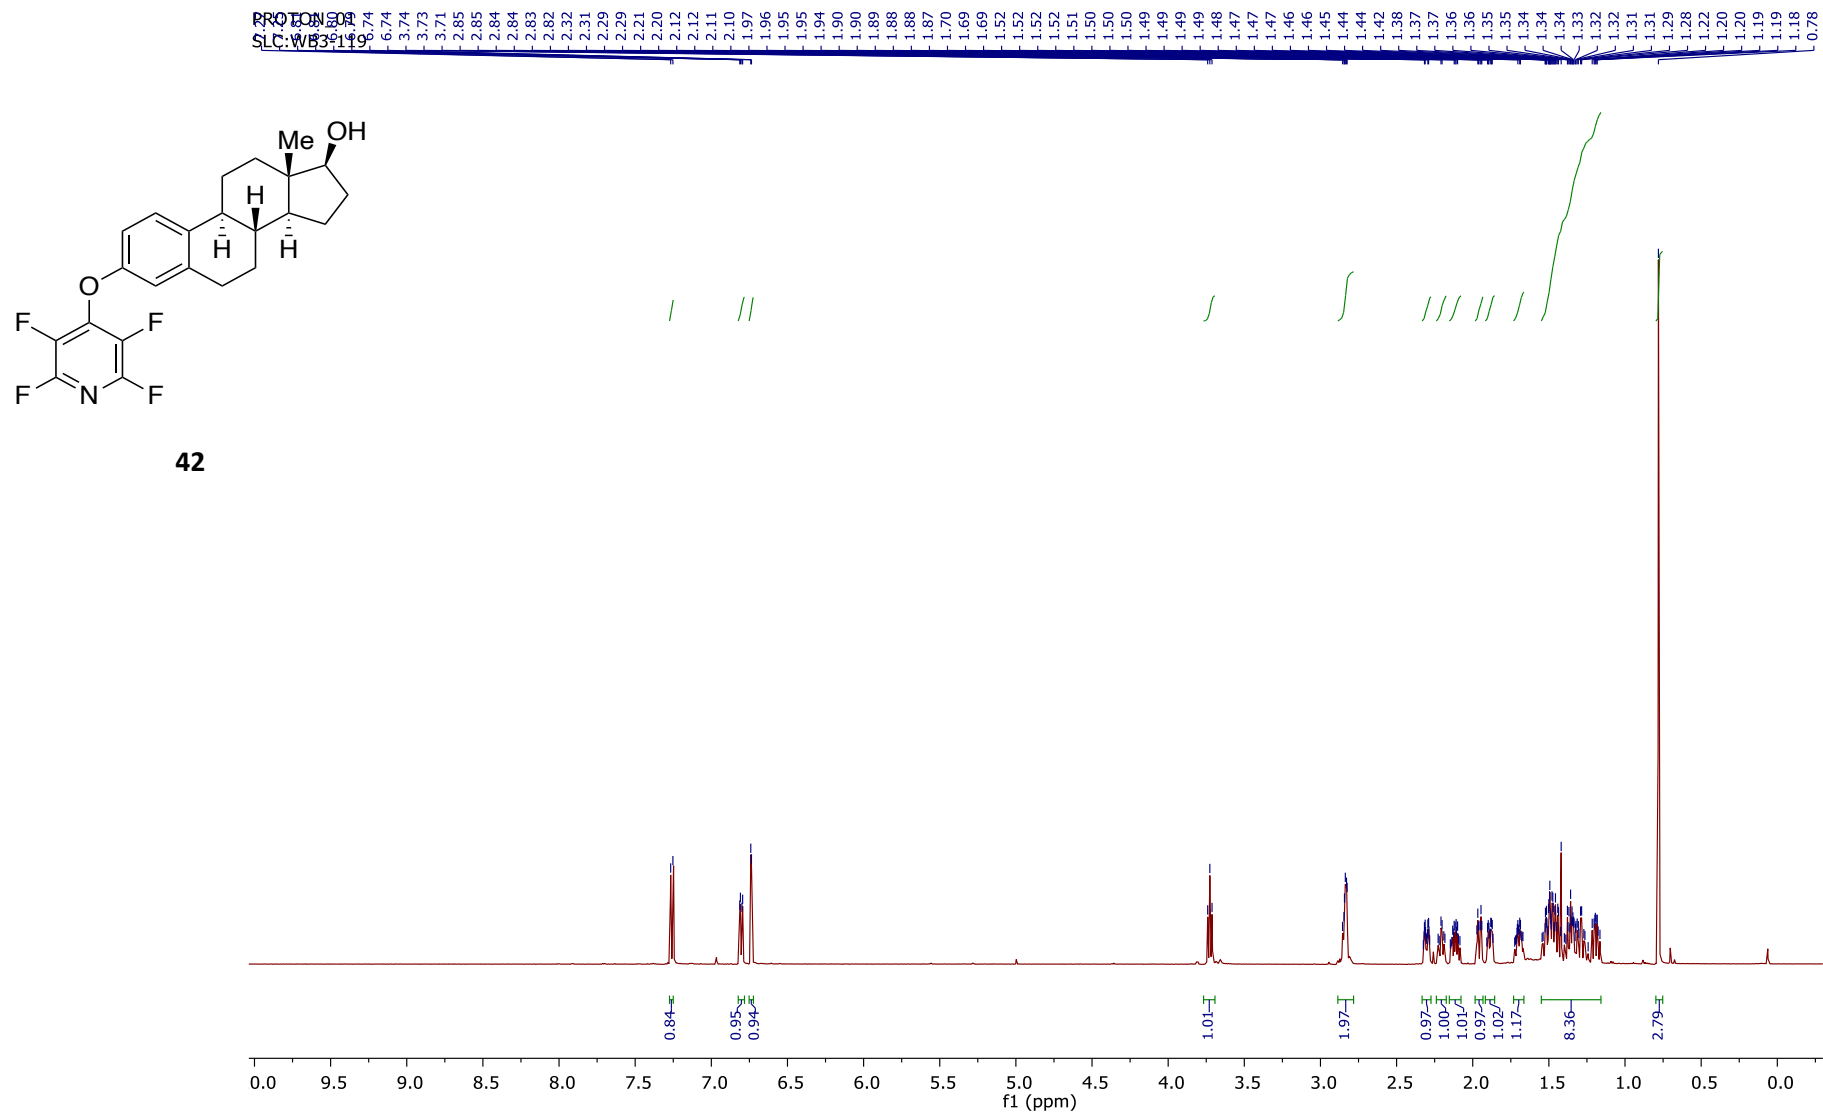

Figure S112.  $^1\text{H}$  NMR spectrum of **42** recorded at 600 MHz in  $\text{CDCl}_3$ .

24142808.13.fid  
SLC:WDGB:WB3-119

-88.88  
-88.92  
-88.96  
-88.98  
-89.01  
-89.05

-154.33  
-154.37  
-154.40  
-154.42  
-154.46  
-154.50

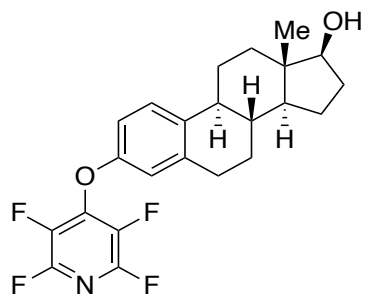

**42**

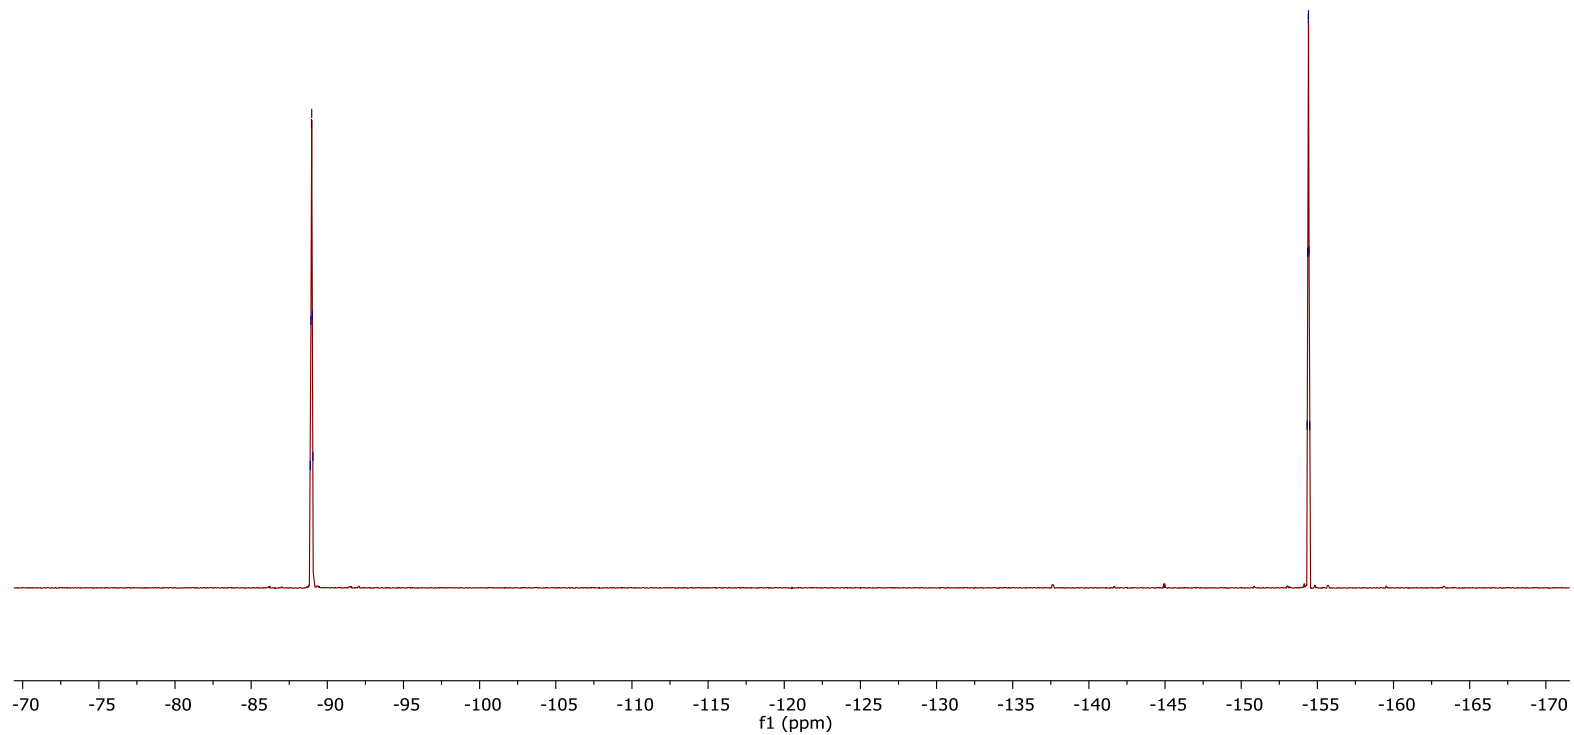

**Figure S113.**  $^{19}\text{F}\{^1\text{H}\}$  NMR spectrum of **42** recorded at 376 MHz in  $\text{CDCl}_3$ .

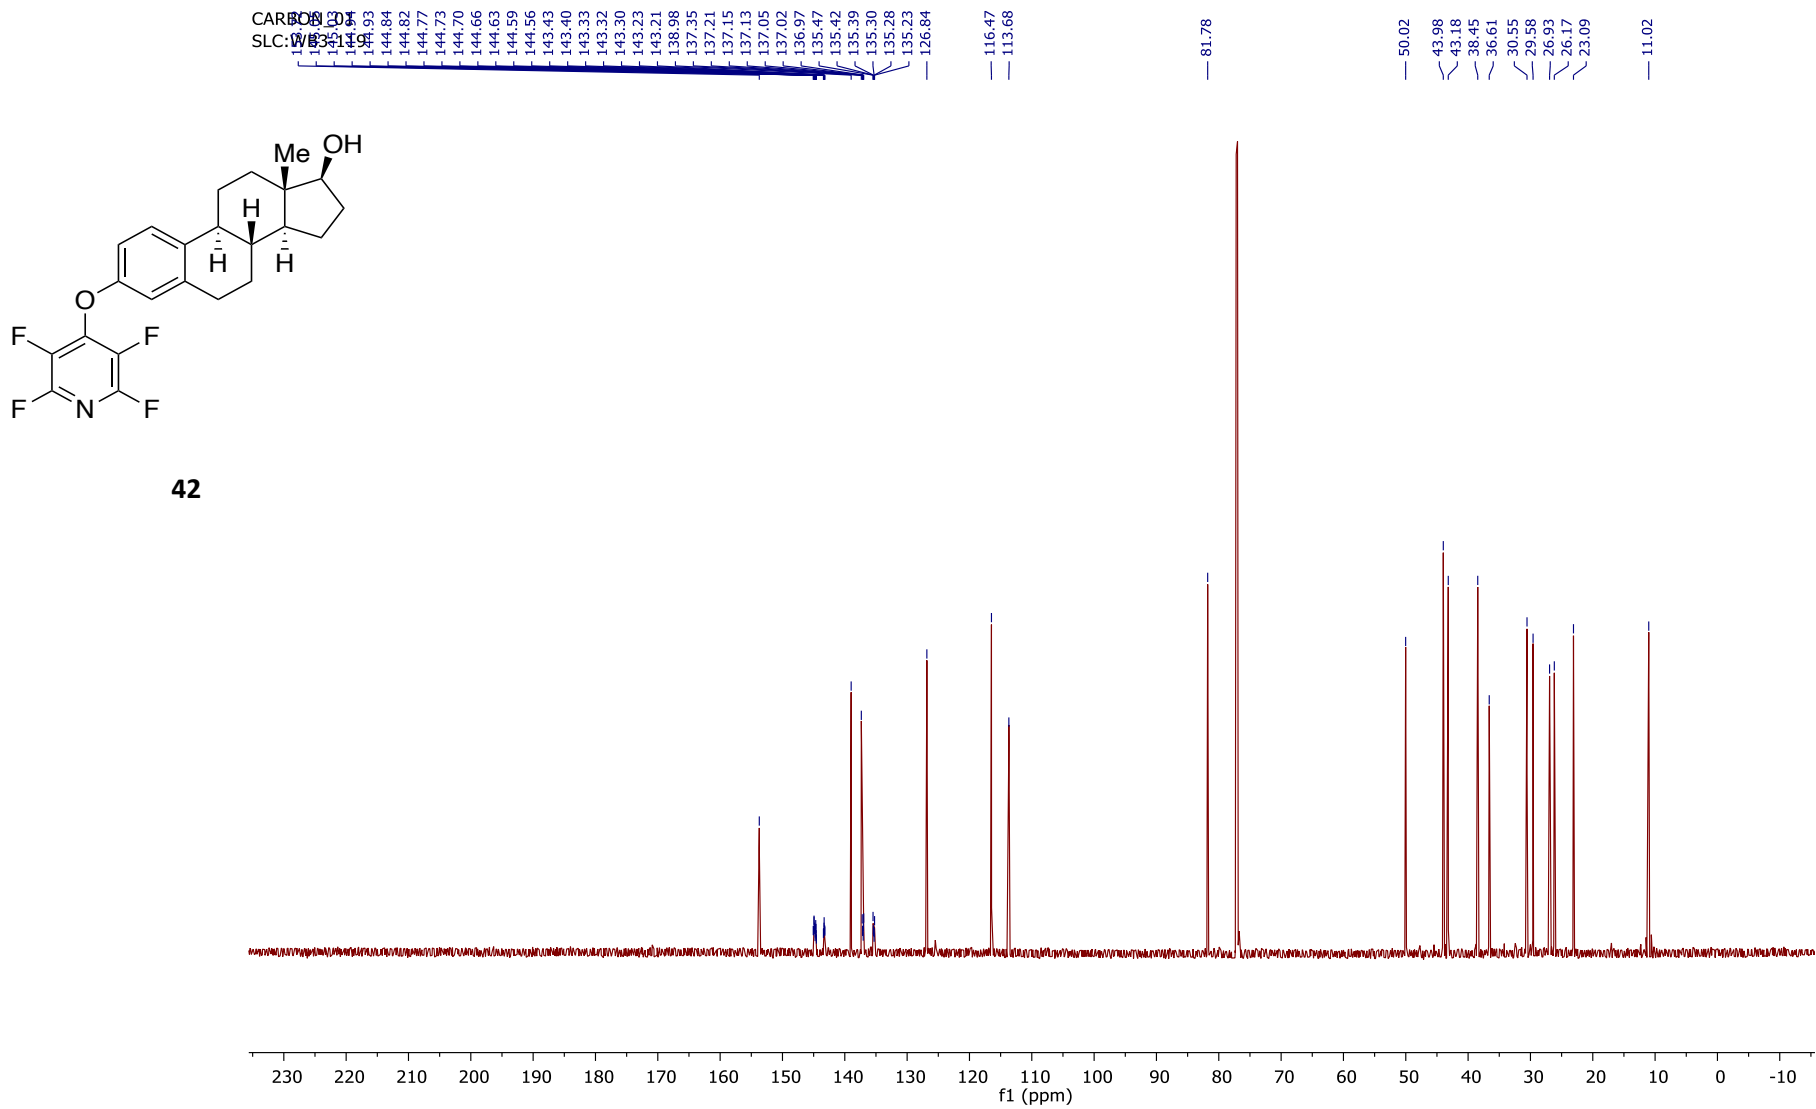

Figure S114.  $^{13}\text{C}\{^1\text{H}\}$  NMR spectrum of **42** recorded at 151 MHz in  $\text{CDCl}_3$ .

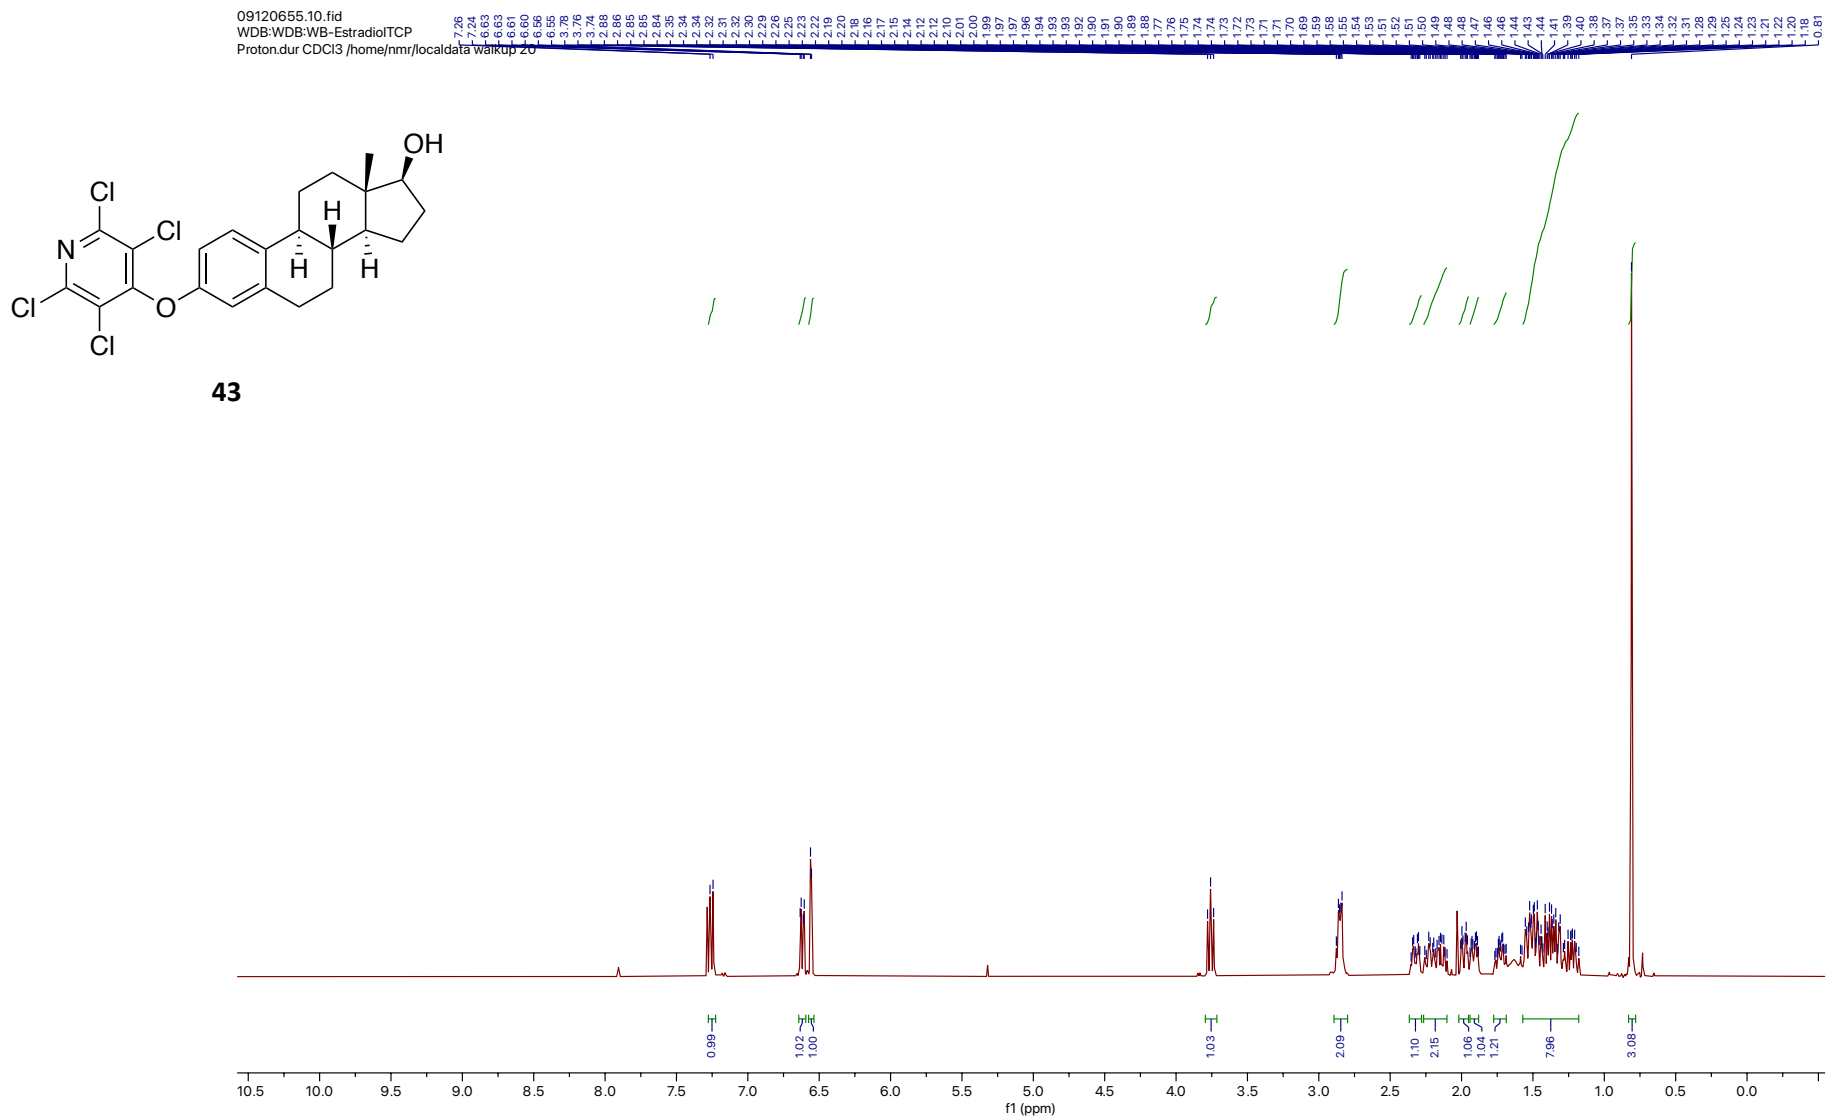

Figure S115.  $^1\text{H}$  NMR spectrum of **43** recorded at 400 MHz in  $\text{CDCl}_3$ .

09120655.11.fid  
WDB:WDB:WB-EstradioiTCP  
Carbon.dur CDCl3 /home/nmr/localdata/walkup 20

157.57  
153.13  
147.14  
139.03  
136.20  
126.90  
125.73  
115.21  
112.50  
81.84  
50.07  
44.00  
43.24  
38.53  
36.67  
29.68  
30.60  
27.02  
25.14  
23.14  
11.08

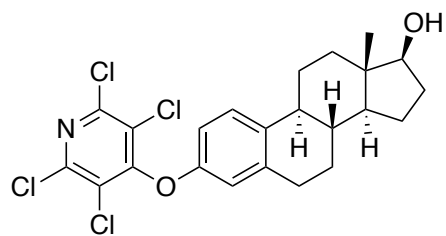

43

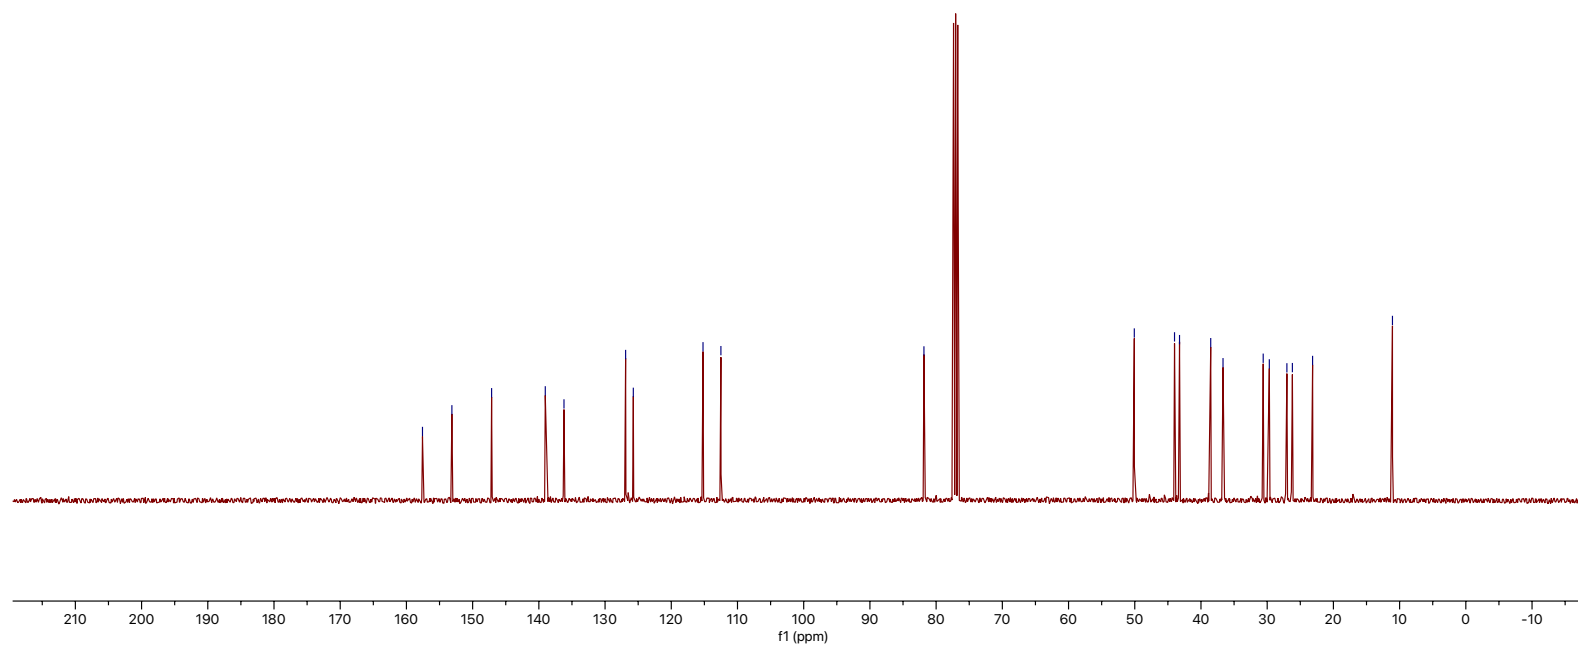

Figure S116.  $^{13}\text{C}\{^1\text{H}\}$  NMR spectrum of **43** recorded at 101 MHz in  $\text{CDCl}_3$ .

## CSD Search Parameters

CSD version 5.44 (April 2023) was used for the search. Queries were generated using *Conquest*. The search parameters dictated that the crystal structures must be organic, not polymers, single crystals only,  $R_1 < 0.075$ , no errors and no disorder allowed.

The draw tool was used to search for TFP and TCP containing compounds. The following representations were the structures used in to identify hit compounds:

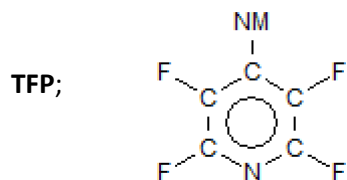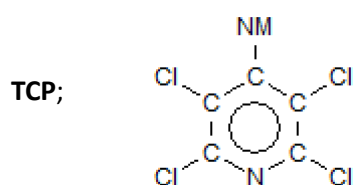

The TFP search returned 169 results and the TCP search returned 16 hits.

Lists of the refcodes for the crystal structures can be found below.

**Table S1.** TFP derivatized organic compounds in the CSD.

| NAME     | Publication Year | R-factor | Space Group. Symbol                                   | Z Prime |
|----------|------------------|----------|-------------------------------------------------------|---------|
| AFUPUN   | 2008             | 3.93     | <i>P</i> -1                                           | 3       |
| AHECEY   | 2020             | 4.59     | <i>P</i> 2 <sub>1</sub> / <i>n</i>                    | 1       |
| AMOCOV   | 2011             | 2.14     | <i>Pna</i> 2 <sub>1</sub>                             | 1       |
| APASUG   | 2011             | 3.05     | <i>I</i> 4 <sub>1</sub> <i>cd</i>                     | 1       |
| APILES   | 2012             | 1.95     | <i>P</i> 2 <sub>1</sub> / <i>c</i>                    | 1       |
| APIQAT   | 2012             | 4.19     | <i>P</i> 2 <sub>1</sub> / <i>c</i>                    | 1       |
| APIQEX   | 2012             | 3.76     | <i>P</i> 2 <sub>1</sub> / <i>c</i>                    | 1       |
| AQAKEK   | 2016             | 3.68     | <i>P</i> -1                                           | 2       |
| BECFUM   | 2012             | 3.4      | <i>P</i> 2 <sub>1</sub> / <i>c</i>                    | 2       |
| BECGAT   | 2012             | 3.61     | <i>P</i> 2 <sub>1</sub> / <i>c</i>                    | 2       |
| BEJPAK   | 2017             | 6.88     | <i>Fdd</i> 2                                          | 0.5     |
| BELLUD   | 2022             | 4.22     | <i>P</i> 2 <sub>1</sub> / <i>n</i>                    | 1       |
| CALVIV   | 2002             | 5.51     | <i>I</i> 2                                            | 2       |
| COZXAT   | 2020             | 3.52     | <i>P</i> 2 <sub>1</sub>                               | 1       |
| DATLIV   | 2012             | 5.88     | <i>Pnma</i>                                           | 0.5     |
| DATLIV01 | 2013             | 2.02     | <i>Pnma</i>                                           | 0.5     |
| DIXVUB   | 1985             | 5.6      | <i>P</i> 2 <sub>1</sub> / <i>c</i>                    | 1       |
| FAJVER   | 1987             | 4.4      | <i>Pnma</i>                                           | 0.5     |
| FAQYOP   | 2022             | 1.73     | <i>P</i> -1                                           | 1       |
| FEDJAD   | 2022             | 6.76     | <i>P</i> -1                                           | 1       |
| FIHJOZ   | 2023             | 4.25     | <i>P</i> 2 <sub>1</sub> / <i>n</i>                    | 1       |
| FIPZIP   | 2014             | 3.84     | <i>P</i> 2 <sub>1</sub>                               | 2       |
| FISJOJ   | 2019             | 3.84     | <i>P</i> 2 <sub>1</sub> / <i>c</i>                    | 1       |
| FISJUP   | 2019             | 6.62     | <i>P</i> 2 <sub>1</sub> / <i>c</i>                    | 2       |
| FOFYIL   | 2019             | 2.69     | <i>P</i> 4 <sub>1</sub> 2 <sub>1</sub> 2              | 0.5     |
| FOFYOR   | 2019             | 1.88     | <i>P</i> 4 <sub>1</sub> 2 <sub>1</sub> 2              | 0.5     |
| FOFYUX   | 2019             | 1.37     | <i>C</i> 2/ <i>c</i>                                  | 1.5     |
| FOFZAE   | 2019             | 2.05     | <i>C</i> 2/ <i>c</i>                                  | 0.5     |
| FOFZEI   | 2019             | 4.16     | <i>P</i> -1                                           | 1       |
| FOFZIM   | 2019             | 1.37     | <i>P</i> 2 <sub>1</sub> / <i>n</i>                    | 1       |
| FOFZOS   | 2019             | 1.9      | <i>P</i> 2 <sub>1</sub> 2 <sub>1</sub> 2 <sub>1</sub> | 2       |
| FOFZUY   | 2019             | 3.76     | <i>P</i> 2 <sub>1</sub> 2 <sub>1</sub> 2 <sub>1</sub> | 2       |
| FOGBAH   | 2019             | 2.89     | <i>P</i> 2 <sub>1</sub> 2 <sub>1</sub> 2 <sub>1</sub> | 1       |
| FOGDOX   | 2019             | 1.6      | <i>P</i> 2 <sub>1</sub> 2 <sub>1</sub> 2 <sub>1</sub> | 1       |
| GEQDUF   | 2022             | 4.47     | <i>P</i> -1                                           | 1       |
| GOFCEL   | 2014             | 5.27     | <i>P</i> 2 <sub>1</sub> / <i>c</i>                    | 1       |
| GOF CIP  | 2014             | 4.09     | <i>P</i> 2 <sub>1</sub> 2 <sub>1</sub> 2              | 1       |
| GUGRUY   | 2020             | 3.26     | <i>Cc</i>                                             | 1       |
| GUGRUY01 | 2022             | 6.42     | <i>Cc</i>                                             | 1       |
| GUGSEJ   | 2020             | 4.2      | <i>P</i> 2 <sub>1</sub> / <i>n</i>                    | 1       |
| GUGSUZ   | 2020             | 4.79     | <i>C</i> 2/ <i>c</i>                                  | 1       |
| HICBAW   | 1995             | 2.5      | <i>P</i> -1                                           | 2       |
| HILJ AQ  | 2019             | 2.85     | <i>P</i> -1                                           | 1       |
| HIQYEL   | 1999             | 4.6      | <i>P</i> -1                                           | 1       |

|        |      |          |              |     |
|--------|------|----------|--------------|-----|
| HUBWIK | 2000 | 5.74     | $P2_1/c$     | 1   |
| HUXWIJ | 2020 | 3.97     | $P2_1/c$     | 1   |
| ITUCUY | 2021 | 3.07     | $I2/a$       | 1   |
| IWENEF | 2016 | 2.45     | $P2_1/n$     | 1   |
| IWEPAD | 2016 | 3.07     | $Pna2_1$     | 1   |
| JAFLIO | 2016 | 2.93     | $P-1$        | 1   |
| JAFXEW | 2016 | 2.42     | $P2_1/c$     | 1   |
| JAFXUM | 2016 | 3.63     | $P2_1/c$     | 1   |
| JIFVAY | 2018 | 3.39     | $C2/c$       | 0.5 |
| JIFVEC | 2018 | 3.8      | $C2/c$       | 0.5 |
| JUTBUY | 2020 | 2.94     | $P2_1/c$     | 1   |
| JUTCAF | 2020 | 1.63     | $P2_1$       | 1   |
| KAMTUO | 2004 | 3.51     | $Pbca$       | 0.5 |
| KECCED | 2017 | 4.39     | $I4_1/acd$   | 0.5 |
| KECNOY | 2017 | 4.39     | $P2_1/c$     | 1   |
| KECNUE | 2017 | 3.96     | $C2/c$       | 2   |
| KEDWEW | 2006 | 4.53     | $P2_1/c$     | 1   |
| KEDWIA | 2006 | 3.18     | $P2_1/c$     | 1   |
| KIKVUV | 1991 | 4.2      | $P2_1/n$     | 0.5 |
| LAHBEC | 2004 | 6.67     | $P2_1/c$     | 0.5 |
| LAHBUS | 2004 | 3.65     | $P2_12_12_1$ | 1   |
| LAKDOU | 2020 | 4.31     | $P-1$        | 1   |
| LUJYEU | 2001 | 5.77     | $Pbca$       | 1   |
| MOJFUP | 2019 | 4.47     | $P-1$        | 2   |
| MOJGAW | 2019 | 3.81     | $P2_1/n$     | 1   |
| MOYJAN | 2015 | 3.53     | $P2_1/n$     | 1   |
| NALJAP | 2019 | 4.56     | $C2/c$       | 0.5 |
| NEMHAO | 2001 | 5.2      | $C2/c$       | 1   |
| NEMHES | 2001 | 5.27     | $P112_1/b$   | 4   |
| NEPTUB | 2022 | 3        | $P-1$        | 1   |
| NIXMIR | 2008 | 3.94     | $P2_1/c$     | 1   |
| NUJQEQ | 2015 | 5.12     | $C2/c$       | 1   |
| NUJQIU | 2015 | 3.87     | $P2_1/n$     | 1   |
| NUMVUO | 2011 | 2.89     | $P2_1$       | 1   |
| NUTPAW | 2020 | 3.38     | $P2_12_12_1$ | 1   |
| NUZPOO | 2010 | 7.37     | $P-1$        | 1   |
| ODAWIC | 2016 | 4.9      | $P-1$        | 2   |
| OFOLIG | 2012 | 4.79     | $P2_1/n$     | 1   |
| OMUMAN | 2021 | 4. $4_1$ | $P-1$        | 1   |
| OXUTOT | 2021 | 5. $2_1$ | $P-1$        | 0.5 |
| PAJCAG | 2012 | 5.32     | $P2_1/n$     | 1   |
| PALPOI | 2005 | 4.61     | $P-1$        | 2   |
| PALPUO | 2005 | 6.54     | $Pnma$       | 0.5 |
| PALQAV | 2005 | 4.7      | $P2_1/n$     | 1   |
| PALQEZ | 2005 | 3.72     | $P-1$        | 1   |
| PAXCUQ | 2022 | 4. $2_1$ | $P1$         | 1   |
| PUBGOI | 1998 | 6.55     | $P2_1/n$     | 2   |
| PUXYUE | 2016 | 3.99     | $P2_1$       | 4   |

|          |      |                  |              |     |
|----------|------|------------------|--------------|-----|
| RARFUO   | 2017 | 3.89             | $P2_1/c$     | 1   |
| RARGOJ   | 2017 | 3.73             | $P2_1$       | 2   |
| RITNOY02 | 2013 | 2.95             | $P2_1/n$     | 2   |
| RUSXEL   | 2020 | 4.31             | $P2_1/c$     | 2   |
| RUSXIP   | 2020 | 4.22             | $Pbca$       | 1   |
| RUXKIE   | 2002 | 5.68             | $P2_1/c$     | 1   |
| SEYTIB   | 2013 | 3.63             | $P-1$        | 2   |
| SEYTOH   | 2013 | 4.9              | $P2_1/c$     | 1   |
| SIXYIH   | 1991 | 4.9              | $P-1$        | 1   |
| SULTAV   | 2009 | 2.86             | $P-1$        | 1   |
| TACWIE   | 2003 | 5.17             | $P2_1/c$     | 2   |
| TAPRAD   | 1992 | 4.8              | $P2_1/n$     | 1   |
| TIDJID   | 2023 | 6.93             | $P2_1/c$     | 1   |
| TUHJIR   | 2015 | 6.33             | $P2_1/n$     | 1   |
| TUHJOX   | 2015 | 4.48             | $Pbca$       | 0.5 |
| TUHJOX01 | 2015 | 5                | $Pbca$       | 0.5 |
| TUHJOX02 | 2020 | 3.34             | $Pbca$       | 0.5 |
| TUMWAC   | 2020 | 4.01             | $P-1$        | 2   |
| UDUXEY   | 2009 | 3.46             | $P2_1/n$     | 1   |
| UPULOH   | 2011 | 4.88             | $P-1$        | 2   |
| UPULUN   | 2011 | 5.52             | $Pbca$       | 1   |
| URAFIF   | 2021 | 4.25             | $Pbca$       | 2   |
| VEPXOG   | 2018 | 4.16             | $P2_1/c$     | 1   |
| VOCPEL   | 2019 | 3.91             | $P-1$        | 1   |
| WASBAU   | 2005 | 4.16             | $C2/c$       | 0.5 |
| WEXMUK   | 2018 | 6.46             | $P2_1/c$     | 1   |
| WOLPEV   | 2019 | 2.84             | $P2_12_12_1$ | 1   |
| WOLPIZ   | 2019 | 3.05             | $P2_1/n$     | 1   |
| WOLPOF   | 2019 | 3.06             | $P2_12_12_1$ | 1   |
| WOLPUL   | 2019 | 3.05             | $P2_1$       | 1   |
| WOLQAS   | 2019 | 3.57             | $Pbcn$       | 0.5 |
| XABBAH   | 2020 | 3.94             | $Pbca$       | 1   |
| XABEL    | 2020 | 5.85             | $P-1$        | 1   |
| XABBOV   | 2020 | 4.43             | $P2_1/c$     | 1   |
| XABCEM   | 2020 | 6.4 <sub>1</sub> | $Pna2_1$     | 1   |
| XABCOW   | 2020 | 4.47             | $P2_1/c$     | 2   |
| XEKWAN   | 2012 | 3.65             | $P-1$        | 2   |
| XELBIB   | 2012 | 6.48             | $P-1$        | 3   |
| XUTLOQ   | 2020 | 3.52             | $Pna2_1$     | 1   |
| XUTLUW   | 2020 | 3.45             | $P2_1/n$     | 1   |
| XUTMAD   | 2020 | 3.23             | $P-1$        | 2   |
| XUTMAD01 | 2020 | 5.12             | $C2/c$       | 0.5 |
| XUTMIL   | 2020 | 3.33             | $P32_12$     | 1   |
| XUTMOR   | 2020 | 3.47             | $P-1$        | 1   |
| XUTMUX   | 2020 | 3.28             | $P-1$        | 2   |
| XUTNAE   | 2020 | 2.66             | $C222_1$     | 0.5 |
| XUTNIM   | 2020 | 3.8              | $P-1$        | 2   |
| XUTNOS   | 2020 | 3.18             | $P2_1/n$     | 1   |

|          |      |      |              |     |
|----------|------|------|--------------|-----|
| XUTPEK   | 2020 | 4.71 | $P2_1/c$     | 1   |
| XUZWUN   | 2020 | 6.55 | $P2_1/c$     | 1   |
| XUZXAU   | 2020 | 6.85 | $P2_1$       | 2   |
| XUZXEY   | 2020 | 5.51 | $P2_1/c$     | 1   |
| XUZXIC   | 2020 | 3.67 | $Fdd2$       | 1   |
| XUZXOI   | 2020 | 4.12 | $P2_1/c$     | 1   |
| XUZXUO   | 2020 | 6    | $P2_1/c$     | 2   |
| XUZYAV   | 2020 | 4.96 | $P-1$        | 1   |
| XUZYEZ   | 2020 | 6.56 | $P2_1/c$     | 1   |
| XUZYID   | 2020 | 6.2  | $P-1$        | 1   |
| XUZYOJ   | 2020 | 3.57 | $P2_1/n$     | 1   |
| XUZYOJ01 | 2020 | 7.26 | $P2_1/n$     | 1   |
| XUZZAW   | 2020 | 3.97 | $P2_1/n$     | 1   |
| XUZZEA   | 2020 | 7.15 | $P2_1/c$     | 1   |
| XUZZIE   | 2020 | 6.56 | $P2_1/c$     | 1   |
| XUZZOK   | 2020 | 3.43 | $P2_1/n$     | 1   |
| XUZZUQ   | 2020 | 3.56 | $P2_1/c$     | 1   |
| YAKXUH   | 2021 | 3.57 | $P4_12_12$   | 0.5 |
| YAKZET   | 2021 | 3.36 | $Pbcn$       | 0.5 |
| YAVFOR   | 2005 | 5.81 | $P-1$        | 1   |
| YAVFUX   | 2005 | 6.74 | $P2_1/n$     | 1   |
| YAYZUX   | 2022 | 1.99 | $P2_12_12_1$ | 1   |
| YIMNIT   | 2013 | 2.37 | $Pcab$       | 2   |
| ZADVAB   | 1995 | 2.61 | $I2/a$       | 1   |
| ZADVAB01 | 2016 | 1.33 | $C2/c$       | 1   |
| ZECGIZ   | 2012 | 5.56 | $C2/c$       | 1   |
| ZENZAX   | 2022 | 2.83 | $P2_12_12_1$ | 1   |
| ZESBIK   | 2013 | 3.58 | $P-1$        | 1   |
| ZUFTEB   | 2014 | 3.89 | $Pca2_1$     | 2   |

**Table S2.** TCP derivatized organic compounds in the CSD.

| <b>NAME</b> | <b>Publication Year</b> | <b>R-factor</b> | <b>Space Group. Symbol</b>          | <b>Z Prime</b> |
|-------------|-------------------------|-----------------|-------------------------------------|----------------|
| NIDMUM      | 2023                    | 3.94            | <i>P2<sub>1</sub>/c</i>             | 0.5            |
| DEXXAI      | 2018                    | 3.43            | <i>Pna2<sub>1</sub></i>             | 1              |
| EDEGIE      | 2006                    | 2.07            | <i>P-1</i>                          | 1              |
| MESQOT      | 2018                    | 3.16            | <i>P2<sub>1</sub>/c</i>             | 1              |
| OMUMER      | 2021                    | 4.27            | <i>P2<sub>1</sub>/n</i>             | 1              |
| PCLPYR      | 1973                    | 5.9             | <i>P4<sub>1</sub>2<sub>1</sub>2</i> | 0.5            |
| PCLPYR03    | 2015                    | 3.69            | <i>Pc</i>                           | 1              |
| PCLPYR04    | 2015                    | 4.9             | <i>Pc</i>                           | 1              |
| PCLPYR05    | 2015                    | 4.74            | <i>Pc</i>                           | 1              |
| PCLPYR06    | 2015                    | 5.25            | <i>Pc</i>                           | 1              |
| PCLPYR07    | 2015                    | 3.88            | <i>Pc</i>                           | 1              |
| QIVSIA      | 2019                    | 4.99            | <i>P2<sub>1</sub>/c</i>             | 1              |
| RAVVEP      | 1997                    | 4.64            | <i>P2<sub>1</sub>/c</i>             | 1              |
| TCHYPY      | 1972                    | 6.5             | <i>Pbca</i>                         | 1              |
| TESHUX      | 2017                    | 4.4             | <i>P-1</i>                          | 1              |
| XUGXUU      | 2015                    | 2.78            | <i>P2<sub>1</sub>/n</i>             | 1              |

# Crystallography

## Single Crystal X-ray Diffraction Experiments

X-ray single crystal data was collected using  $\lambda\text{MoK}\alpha$  radiation ( $\lambda = 0.71073 \text{ \AA}$ ) or  $\lambda\text{CuK}\alpha$  ( $\lambda = 1.5406 \text{ \AA}$ ) on an *Agilent* XCalibur (Sapphire-3 CCD detector, fine-focus sealed tube, graphite monochromator) or *Bruker* D8 Venture (Photon100 CMOS detector or Photon III MM C7/C14 CPAD detector,  $\mu\text{S}$ microsource, focusing mirrors). Diffractometers are equipped with a *Cryostream* (Oxford Cryosystems) open-flow nitrogen cryostats at a temperature of 120.0 K. All structures were solved by direct methods and refined by full-matrix least squares on F2 for all data using Olex2<sup>[3]</sup> and SHELXTL<sup>[4][5]</sup> software. All non-disordered non-hydrogen atoms were refined anisotropically, the hydrogen atoms were placed in the calculated positions and refined in riding mode unless otherwise specified. Crystallographic data and related CIFs for the structures **1-5**, **7,8**, **10-26**, **28**, **30-33** and **35-43** have been deposited with the joint Cambridge Crystallographic Data Centre and Fachinformationszentrum Karlsruhe Access Structures service and are available free of charge with the following deposition numbers: CCDC-2392089–2392126.

## Crystal Renders

Renders of the crystal structures depicted in figures were made in *VMD version 1.9.3*.

# Crystallographic Data

Crystal structure: 1

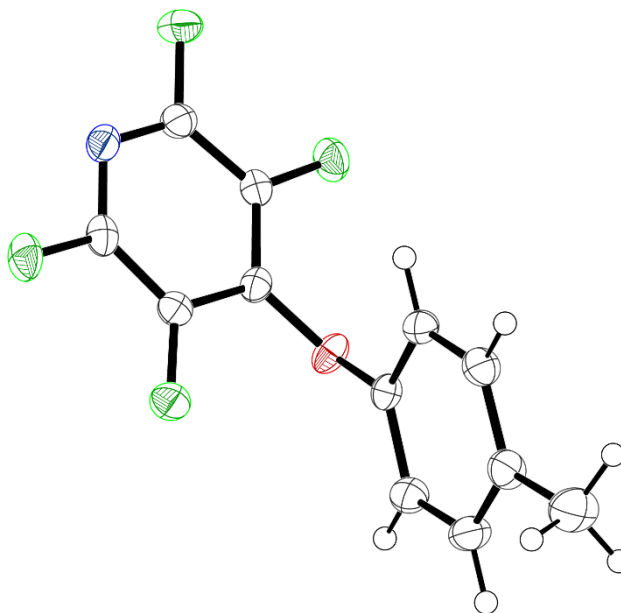

|                                             |                                                               |
|---------------------------------------------|---------------------------------------------------------------|
| Empirical formula                           | C <sub>12</sub> H <sub>7</sub> F <sub>4</sub> NO              |
| Formula weight                              | 257.19                                                        |
| Temperature/K                               | 120.00                                                        |
| Crystal system                              | orthorhombic                                                  |
| Space group                                 | P2 <sub>1</sub> 2 <sub>1</sub> 2 <sub>1</sub>                 |
| a/Å                                         | 5.0569(3)                                                     |
| b/Å                                         | 10.1934(6)                                                    |
| c/Å                                         | 21.1522(13)                                                   |
| α/°                                         | 90                                                            |
| β/°                                         | 90                                                            |
| γ/°                                         | 90                                                            |
| Volume/Å <sup>3</sup>                       | 1090.33(11)                                                   |
| Z                                           | 4                                                             |
| ρ <sub>calc</sub> /cm <sup>3</sup>          | 1.567                                                         |
| μ/mm <sup>-1</sup>                          | 0.147                                                         |
| F(000)                                      | 520.0                                                         |
| Crystal size/mm <sup>3</sup>                | 0.45 × 0.19 × 0.15                                            |
| Radiation                                   | MoKα (λ = 0.71073)                                            |
| 2θ range for data collection/°              | 4.436 to 59.98                                                |
| Index ranges                                | -7 ≤ h ≤ 7, -14 ≤ k ≤ 14, -29 ≤ l ≤ 29                        |
| Reflections collected                       | 18566                                                         |
| Independent reflections                     | 3168 [R <sub>int</sub> = 0.0343, R <sub>sigma</sub> = 0.0245] |
| Data/restraints/parameters                  | 3168/0/164                                                    |
| Goodness-of-fit on F <sup>2</sup>           | 1.024                                                         |
| Final R indexes [I ≥ 2σ (I)]                | R1 = 0.0355, wR2 = 0.0971                                     |
| Final R indexes [all data]                  | R1 = 0.0404, wR2 = 0.1007                                     |
| Largest diff. peak/hole / e Å <sup>-3</sup> | 0.19/-0.16                                                    |
| Flack parameter                             | -0.05(19)                                                     |
| CCDC Number                                 | 2392089                                                       |

Crystal structure: 2

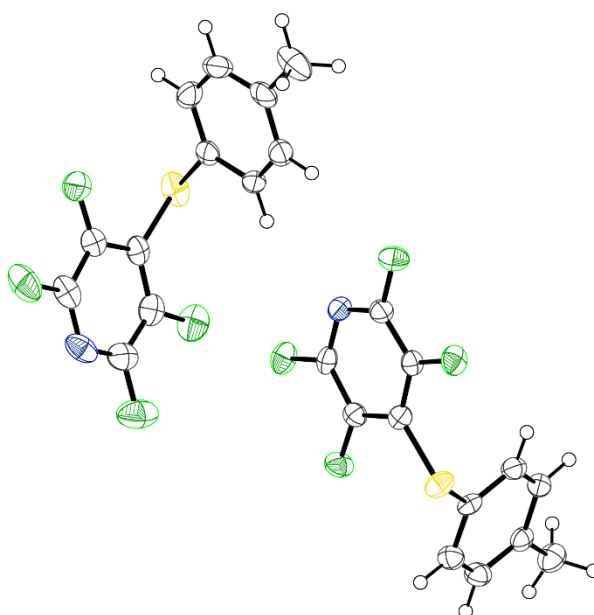

|                                             |                                                               |
|---------------------------------------------|---------------------------------------------------------------|
| Empirical formula                           | C <sub>12</sub> H <sub>7</sub> F <sub>4</sub> NS              |
| Formula weight                              | 273.25                                                        |
| Temperature/K                               | 120.00                                                        |
| Crystal system                              | monoclinic                                                    |
| Space group                                 | P2 <sub>1</sub>                                               |
| a/Å                                         | 12.8721(9)                                                    |
| b/Å                                         | 4.9297(3)                                                     |
| c/Å                                         | 18.1417(12)                                                   |
| α/°                                         | 90                                                            |
| β/°                                         | 99.559(2)                                                     |
| γ/°                                         | 90                                                            |
| Volume/Å <sup>3</sup>                       | 1135.21(13)                                                   |
| Z                                           | 4                                                             |
| ρ <sub>calc</sub> /cm <sup>3</sup>          | 1.599                                                         |
| μ/mm <sup>-1</sup>                          | 0.317                                                         |
| F(000)                                      | 552.0                                                         |
| Crystal size/mm <sup>3</sup>                | 0.154 × 0.09 × 0.023                                          |
| Radiation                                   | Mo Kα (λ = 0.71073)                                           |
| 2θ range for data collection/°              | 4.232 to 61.048                                               |
| Index ranges                                | -18 ≤ h ≤ 18, -7 ≤ k ≤ 7, -25 ≤ l ≤ 25                        |
| Reflections collected                       | 25222                                                         |
| Independent reflections                     | 6905 [R <sub>int</sub> = 0.0618, R <sub>sigma</sub> = 0.0740] |
| Data/restraints/parameters                  | 6905/1/327                                                    |
| Goodness-of-fit on F <sup>2</sup>           | 1.011                                                         |
| Final R indexes [I ≥ 2σ (I)]                | R1 = 0.0504, wR2 = 0.0905                                     |
| Final R indexes [all data]                  | R1 = 0.0885, wR2 = 0.1020                                     |
| Largest diff. peak/hole / e Å <sup>-3</sup> | 0.30/-0.29                                                    |
| Flack parameter                             | 0.01(5)                                                       |
| CCDC Number                                 | 2392090                                                       |

Crystal structure: **3**

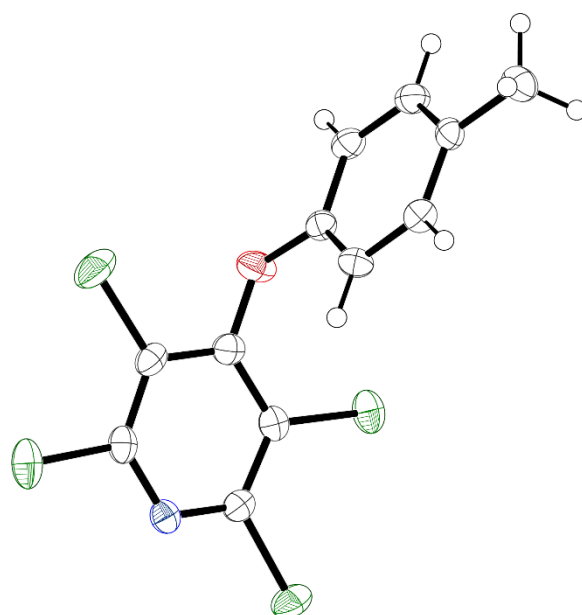

|                                             |                                                               |
|---------------------------------------------|---------------------------------------------------------------|
| Empirical formula                           | C <sub>12</sub> H <sub>7</sub> Cl <sub>4</sub> NO             |
| Formula weight                              | 322.99                                                        |
| Temperature/K                               | 120.00                                                        |
| Crystal system                              | triclinic                                                     |
| Space group                                 | P-1                                                           |
| a/Å                                         | 7.0232(8)                                                     |
| b/Å                                         | 8.9076(10)                                                    |
| c/Å                                         | 11.1467(13)                                                   |
| α/°                                         | 98.465(4)                                                     |
| β/°                                         | 104.067(4)                                                    |
| γ/°                                         | 98.377(4)                                                     |
| Volume/Å <sup>3</sup>                       | 656.98(13)                                                    |
| Z                                           | 2                                                             |
| ρ <sub>calc</sub> /cm <sup>3</sup>          | 1.633                                                         |
| μ/mm <sup>-1</sup>                          | 0.885                                                         |
| F(000)                                      | 324.0                                                         |
| Crystal size/mm <sup>3</sup>                | 0.14 × 0.11 × 0.07                                            |
| Radiation                                   | MoKα (λ = 0.71073)                                            |
| 2θ range for data collection/°              | 4.708 to 59.996                                               |
| Index ranges                                | -9 ≤ h ≤ 9, -12 ≤ k ≤ 12, -15 ≤ l ≤ 15                        |
| Reflections collected                       | 10998                                                         |
| Independent reflections                     | 3818 [R <sub>int</sub> = 0.0388, R <sub>sigma</sub> = 0.0516] |
| Data/restraints/parameters                  | 3818/0/164                                                    |
| Goodness-of-fit on F <sup>2</sup>           | 1.042                                                         |
| Final R indexes [I ≥ 2σ (I)]                | R <sub>1</sub> = 0.0463, wR <sub>2</sub> = 0.0862             |
| Final R indexes [all data]                  | R <sub>1</sub> = 0.0737, wR <sub>2</sub> = 0.0953             |
| Largest diff. peak/hole / e Å <sup>-3</sup> | 0.31/-0.37                                                    |
| CCDC Number                                 | 2392091                                                       |

Crystal structure: 4

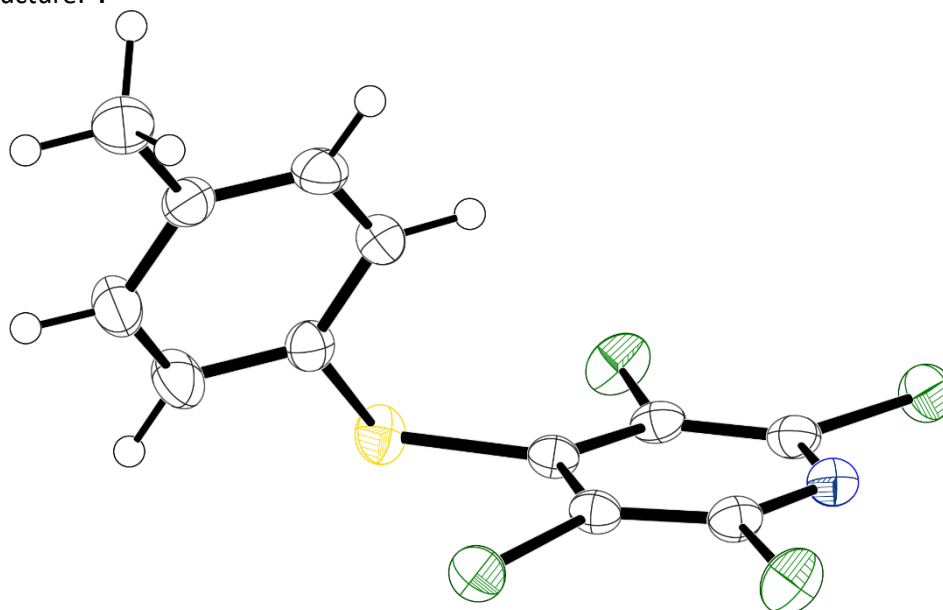

|                                             |                                                               |
|---------------------------------------------|---------------------------------------------------------------|
| Empirical formula                           | C <sub>12</sub> H <sub>7</sub> Cl <sub>4</sub> NS             |
| Formula weight                              | 339.05                                                        |
| Temperature/K                               | 120.00                                                        |
| Crystal system                              | triclinic                                                     |
| Space group                                 | P-1                                                           |
| a/Å                                         | 7.5828(4)                                                     |
| b/Å                                         | 8.5095(5)                                                     |
| c/Å                                         | 11.1016(6)                                                    |
| α/°                                         | 99.980(2)                                                     |
| β/°                                         | 99.362(2)                                                     |
| γ/°                                         | 100.354(2)                                                    |
| Volume/Å <sup>3</sup>                       | 679.98(7)                                                     |
| Z                                           | 2                                                             |
| ρ <sub>calc</sub> /cm <sup>3</sup>          | 1.656                                                         |
| μ/mm <sup>-1</sup>                          | 1.002                                                         |
| F(000)                                      | 340.0                                                         |
| Crystal size/mm <sup>3</sup>                | 0.17 × 0.15 × 0.09                                            |
| Radiation                                   | MoKα (λ = 0.71073)                                            |
| 2θ range for data collection/°              | 4.976 to 59.998                                               |
| Index ranges                                | -10 ≤ h ≤ 10, -11 ≤ k ≤ 11, -15 ≤ l ≤ 15                      |
| Reflections collected                       | 11754                                                         |
| Independent reflections                     | 3956 [R <sub>int</sub> = 0.0309, R <sub>sigma</sub> = 0.0372] |
| Data/restraints/parameters                  | 3956/0/164                                                    |
| Goodness-of-fit on F <sup>2</sup>           | 1.105                                                         |
| Final R indexes [I ≥ 2σ (I)]                | R <sub>1</sub> = 0.0466, wR <sub>2</sub> = 0.0994             |
| Final R indexes [all data]                  | R <sub>1</sub> = 0.0593, wR <sub>2</sub> = 0.1049             |
| Largest diff. peak/hole / e Å <sup>-3</sup> | 0.85/-0.63                                                    |
| CCDC Number                                 | 2392092                                                       |

Crystal structure: 5

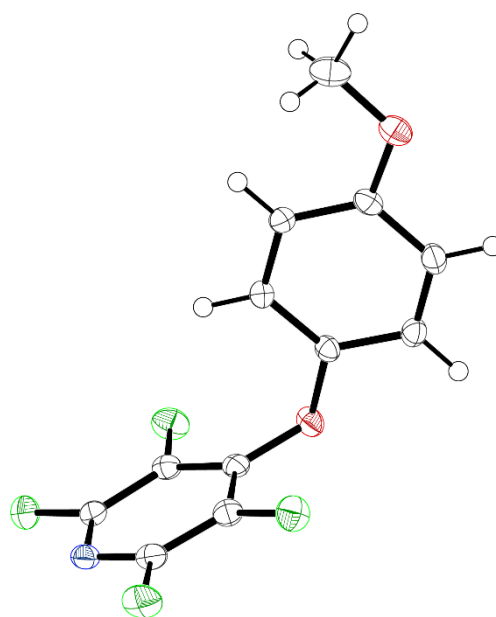

|                                             |                                                               |
|---------------------------------------------|---------------------------------------------------------------|
| Empirical formula                           | C <sub>12</sub> H <sub>7</sub> F <sub>4</sub> NO <sub>2</sub> |
| Formula weight                              | 273.19                                                        |
| Temperature/K                               | 120.00                                                        |
| Crystal system                              | orthorhombic                                                  |
| Space group                                 | P2 <sub>1</sub> 2 <sub>1</sub> 2 <sub>1</sub>                 |
| a/Å                                         | 5.1717(3)                                                     |
| b/Å                                         | 10.3813(6)                                                    |
| c/Å                                         | 20.4426(12)                                                   |
| α/°                                         | 90                                                            |
| β/°                                         | 90                                                            |
| γ/°                                         | 90                                                            |
| Volume/Å <sup>3</sup>                       | 1097.54(11)                                                   |
| Z                                           | 4                                                             |
| ρ <sub>calc</sub> /cm <sup>3</sup>          | 1.653                                                         |
| μ/mm <sup>-1</sup>                          | 0.158                                                         |
| F(000)                                      | 552.0                                                         |
| Crystal size/mm <sup>3</sup>                | 0.243 × 0.177 × 0.064                                         |
| Radiation                                   | Mo Kα (λ = 0.71073)                                           |
| 2θ range for data collection/°              | 4.4 to 67.634                                                 |
| Index ranges                                | -8 ≤ h ≤ 8, -16 ≤ k ≤ 16, -32 ≤ l ≤ 31                        |
| Reflections collected                       | 39872                                                         |
| Independent reflections                     | 4407 [R <sub>int</sub> = 0.0498, R <sub>sigma</sub> = 0.0298] |
| Data/restraints/parameters                  | 4407/0/173                                                    |
| Goodness-of-fit on F <sup>2</sup>           | 1.113                                                         |
| Final R indexes [I ≥ 2σ (I)]                | R <sub>1</sub> = 0.0463, wR <sub>2</sub> = 0.0950             |
| Final R indexes [all data]                  | R <sub>1</sub> = 0.0562, wR <sub>2</sub> = 0.0989             |
| Largest diff. peak/hole / e Å <sup>-3</sup> | 0.36/-0.24                                                    |
| Flack parameter                             | -0.5(2)                                                       |
| CCDC Number                                 | 2392093                                                       |

Crystal structure: 7

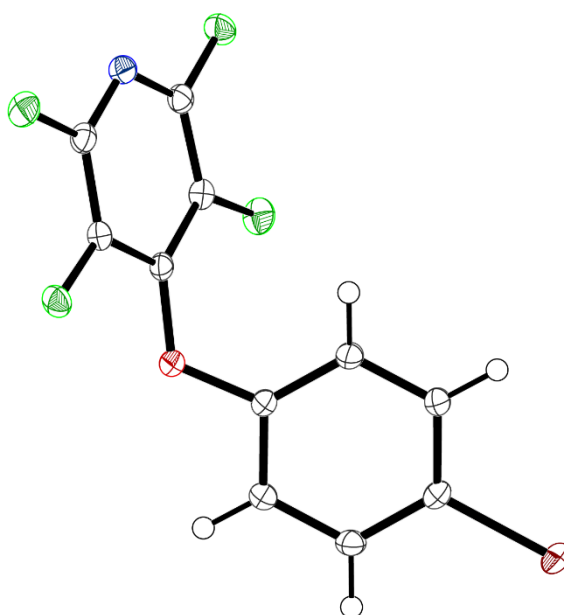

|                                             |                                                               |
|---------------------------------------------|---------------------------------------------------------------|
| Empirical formula                           | C <sub>11</sub> H <sub>4</sub> BrF <sub>4</sub> NO            |
| Formula weight                              | 322.06                                                        |
| Temperature/K                               | 120.00                                                        |
| Crystal system                              | monoclinic                                                    |
| Space group                                 | P2 <sub>1</sub> /n                                            |
| a/Å                                         | 13.3478(4)                                                    |
| b/Å                                         | 5.8419(2)                                                     |
| c/Å                                         | 14.8721(5)                                                    |
| α/°                                         | 90                                                            |
| β/°                                         | 113.5380(10)                                                  |
| γ/°                                         | 90                                                            |
| Volume/Å <sup>3</sup>                       | 1063.18(6)                                                    |
| Z                                           | 4                                                             |
| ρ <sub>calc</sub> /cm <sup>3</sup>          | 2.012                                                         |
| μ/mm <sup>-1</sup>                          | 3.908                                                         |
| F(000)                                      | 624.0                                                         |
| Crystal size/mm <sup>3</sup>                | 0.394 × 0.131 × 0.07                                          |
| Radiation                                   | Mo Kα (λ = 0.71073)                                           |
| 2θ range for data collection/°              | 5.286 to 74.684                                               |
| Index ranges                                | -22 ≤ h ≤ 22, -9 ≤ k ≤ 9, -25 ≤ l ≤ 24                        |
| Reflections collected                       | 40342                                                         |
| Independent reflections                     | 5123 [R <sub>int</sub> = 0.0582, R <sub>sigma</sub> = 0.0405] |
| Data/restraints/parameters                  | 5123/0/163                                                    |
| Goodness-of-fit on F <sup>2</sup>           | 1.041                                                         |
| Final R indexes [I ≥ 2σ (I)]                | R1 = 0.0316, wR2 = 0.0645                                     |
| Final R indexes [all data]                  | R1 = 0.0535, wR2 = 0.0709                                     |
| Largest diff. peak/hole / e Å <sup>-3</sup> | 0.66/-0.64                                                    |
| CCDC Number                                 | 2392094                                                       |

Crystal structure: **8**

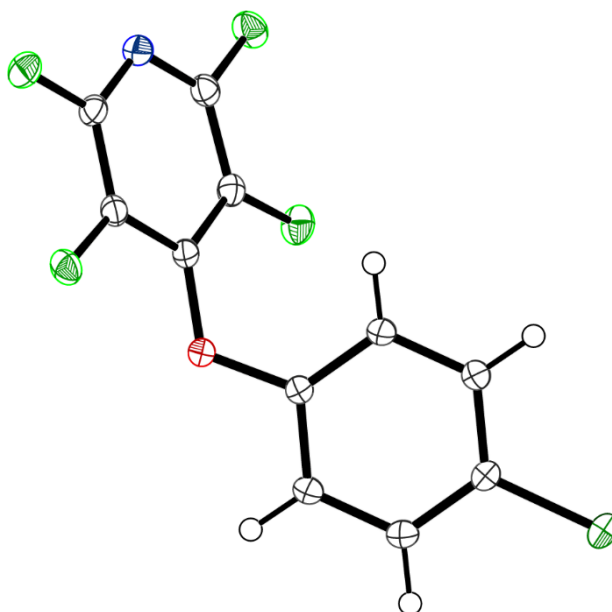

|                                             |                                                               |
|---------------------------------------------|---------------------------------------------------------------|
| Empirical formula                           | C <sub>11</sub> H <sub>4</sub> ClF <sub>4</sub> NO            |
| Formula weight                              | 277.60                                                        |
| Temperature/K                               | 120.00                                                        |
| Crystal system                              | monoclinic                                                    |
| Space group                                 | P2 <sub>1</sub> /n                                            |
| a/Å                                         | 13.0866(3)                                                    |
| b/Å                                         | 5.84450(10)                                                   |
| c/Å                                         | 14.7452(4)                                                    |
| α/°                                         | 90                                                            |
| β/°                                         | 112.0060(10)                                                  |
| γ/°                                         | 90                                                            |
| Volume/Å <sup>3</sup>                       | 1045.62(4)                                                    |
| Z                                           | 4                                                             |
| ρ <sub>calc</sub> /cm <sup>3</sup>          | 1.763                                                         |
| μ/mm <sup>-1</sup>                          | 0.407                                                         |
| F(000)                                      | 552.0                                                         |
| Crystal size/mm <sup>3</sup>                | 0.216 × 0.158 × 0.147                                         |
| Radiation                                   | Mo Kα (λ = 0.71073)                                           |
| 2θ range for data collection/°              | 5.258 to 74.69                                                |
| Index ranges                                | -21 ≤ h ≤ 21, -9 ≤ k ≤ 9, -24 ≤ l ≤ 25                        |
| Reflections collected                       | 47725                                                         |
| Independent reflections                     | 5171 [R <sub>int</sub> = 0.0266, R <sub>sigma</sub> = 0.0160] |
| Data/restraints/parameters                  | 5171/0/163                                                    |
| Goodness-of-fit on F <sup>2</sup>           | 1.043                                                         |
| Final R indexes [I ≥ 2σ(I)]                 | R1 = 0.0335, wR2 = 0.0879                                     |
| Final R indexes [all data]                  | R1 = 0.0397, wR2 = 0.0914                                     |
| Largest diff. peak/hole / e Å <sup>-3</sup> | 0.55/-0.34                                                    |
| CCDC Number                                 | 2392095                                                       |

Crystal structure: **9** (FISJUP)<sup>[1b]</sup>

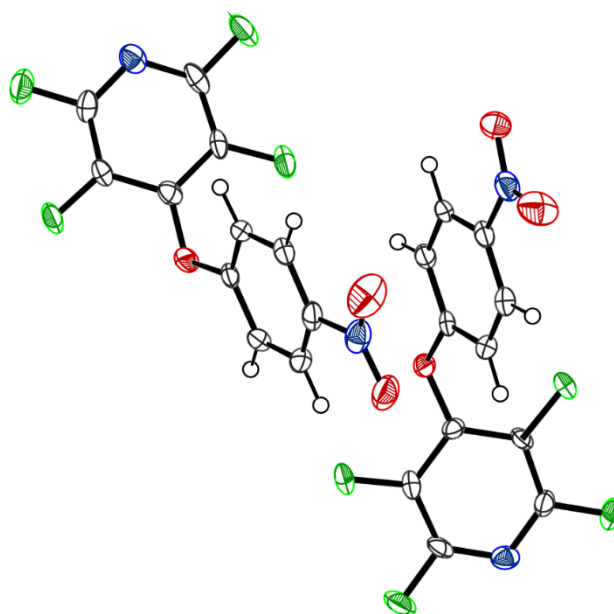

|                                             |                                                                             |
|---------------------------------------------|-----------------------------------------------------------------------------|
| Empirical formula                           | C <sub>11</sub> H <sub>4</sub> F <sub>4</sub> N <sub>2</sub> O <sub>3</sub> |
| Formula weight                              | 288.16                                                                      |
| Temperature/K                               | 120.0                                                                       |
| Crystal system                              | monoclinic                                                                  |
| Space group                                 | P2 <sub>1</sub> /c                                                          |
| a/Å                                         | 7.4591(17)                                                                  |
| b/Å                                         | 10.786(3)                                                                   |
| c/Å                                         | 26.797(6)                                                                   |
| α/°                                         | 90                                                                          |
| β/°                                         | 91.012(6)                                                                   |
| γ/°                                         | 90                                                                          |
| Volume/Å <sup>3</sup>                       | 2155.6(9)                                                                   |
| Z                                           | 8                                                                           |
| ρ <sub>calc</sub> /cm <sup>3</sup>          | 1.776                                                                       |
| μ/mm <sup>-1</sup>                          | 0.175                                                                       |
| F(000)                                      | 1152.0                                                                      |
| Crystal size/mm <sup>3</sup>                | 0.42 × 0.05 × 0.04                                                          |
| Radiation                                   | MoKα (λ = 0.71073)                                                          |
| 2θ range for data collection/°              | 4.07 to 55.992                                                              |
| Index ranges                                | -9 ≤ h ≤ 9, -14 ≤ k ≤ 14, -35 ≤ l ≤ 35                                      |
| Reflections collected                       | 26864                                                                       |
| Independent reflections                     | 5207 [R <sub>int</sub> = 0.1252, R <sub>sigma</sub> = 0.1388]               |
| Data/restraints/parameters                  | 5207/0/361                                                                  |
| Goodness-of-fit on F <sup>2</sup>           | 1.010                                                                       |
| Final R indexes [I ≥ 2σ (I)]                | R <sub>1</sub> = 0.0662, wR <sub>2</sub> = 0.1120                           |
| Final R indexes [all data]                  | R <sub>1</sub> = 0.1654, wR <sub>2</sub> = 0.1393                           |
| Largest diff. peak/hole / e Å <sup>-3</sup> | 0.28/-0.36                                                                  |

Crystal structure: 10

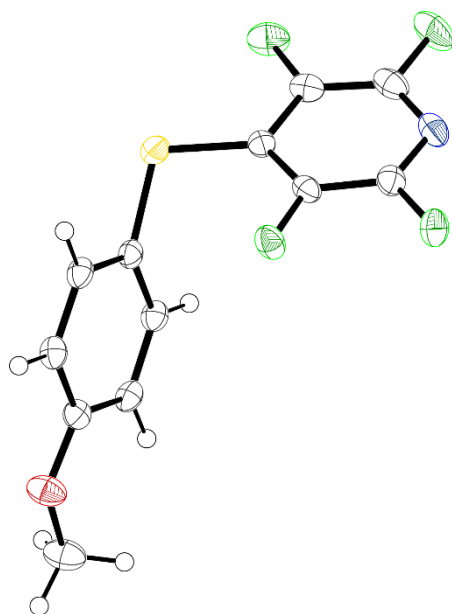

|                                             |                                                               |
|---------------------------------------------|---------------------------------------------------------------|
| Empirical formula                           | C <sub>12</sub> H <sub>7</sub> F <sub>4</sub> NOS             |
| Formula weight                              | 289.25                                                        |
| Temperature/K                               | 120.00                                                        |
| Crystal system                              | orthorhombic                                                  |
| Space group                                 | P2 <sub>1</sub> 2 <sub>1</sub> 2 <sub>1</sub>                 |
| a/Å                                         | 5.1181(3)                                                     |
| b/Å                                         | 12.5033(7)                                                    |
| c/Å                                         | 18.2341(10)                                                   |
| α/°                                         | 90                                                            |
| β/°                                         | 90                                                            |
| γ/°                                         | 90                                                            |
| Volume/Å <sup>3</sup>                       | 1166.86(11)                                                   |
| Z                                           | 4                                                             |
| ρ <sub>calc</sub> /cm <sup>3</sup>          | 1.646                                                         |
| μ/mm <sup>-1</sup>                          | 0.320                                                         |
| F(000)                                      | 584.0                                                         |
| Crystal size/mm <sup>3</sup>                | 0.499 × 0.172 × 0.056                                         |
| Radiation                                   | Mo Kα (λ = 0.71073)                                           |
| 2θ range for data collection/°              | 3.95 to 62.04                                                 |
| Index ranges                                | -7 ≤ h ≤ 7, -18 ≤ k ≤ 18, -26 ≤ l ≤ 26                        |
| Reflections collected                       | 36486                                                         |
| Independent reflections                     | 3731 [R <sub>int</sub> = 0.0801, R <sub>sigma</sub> = 0.0423] |
| Data/restraints/parameters                  | 3731/0/173                                                    |
| Goodness-of-fit on F <sup>2</sup>           | 1.075                                                         |
| Final R indexes [I ≥ 2σ (I)]                | R <sub>1</sub> = 0.0438, wR <sub>2</sub> = 0.0877             |
| Final R indexes [all data]                  | R <sub>1</sub> = 0.0534, wR <sub>2</sub> = 0.0912             |
| Largest diff. peak/hole / e Å <sup>-3</sup> | 0.23/-0.23                                                    |
| Flack parameter                             | 0.02(6)                                                       |
| CCDC Number                                 | 2392096                                                       |

Crystal structure: **11**

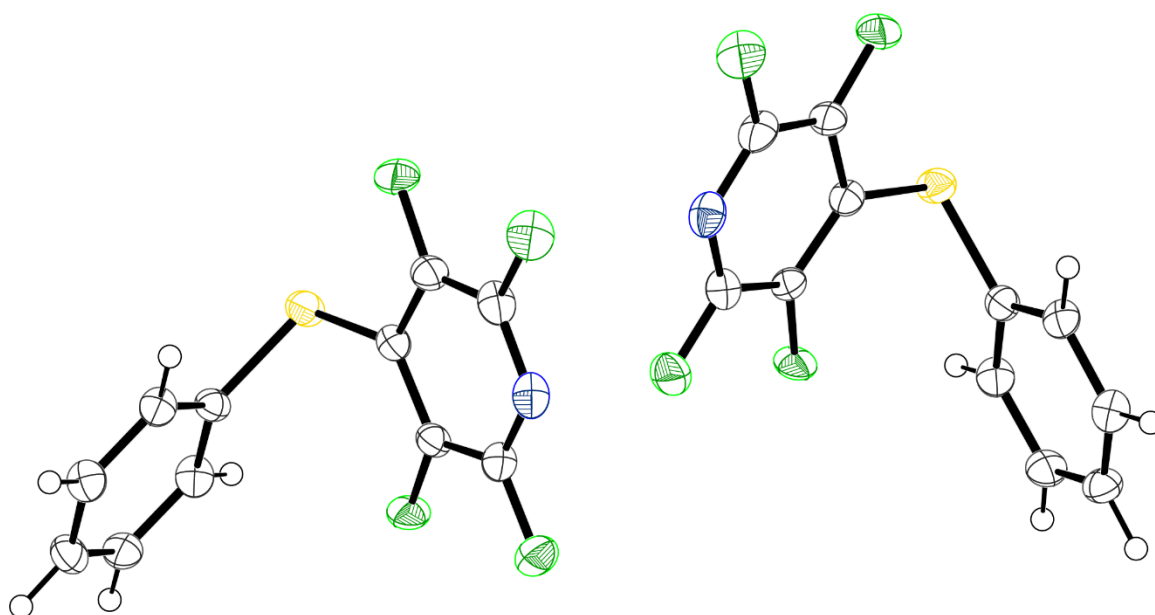

|                                             |                                                               |
|---------------------------------------------|---------------------------------------------------------------|
| Empirical formula                           | C <sub>11</sub> H <sub>5</sub> NF <sub>4</sub> S              |
| Formula weight                              | 259.22                                                        |
| Temperature/K                               | 120                                                           |
| Crystal system                              | monoclinic                                                    |
| Space group                                 | P2 <sub>1</sub>                                               |
| a/Å                                         | 12.5441(12)                                                   |
| b/Å                                         | 5.1068(5)                                                     |
| c/Å                                         | 16.2407(16)                                                   |
| α/°                                         | 90                                                            |
| β/°                                         | 97.427(3)                                                     |
| γ/°                                         | 90                                                            |
| Volume/Å <sup>3</sup>                       | 1031.65(17)                                                   |
| Z                                           | 4                                                             |
| ρ <sub>calc</sub> /cm <sup>3</sup>          | 1.669                                                         |
| μ/mm <sup>-1</sup>                          | 0.344                                                         |
| F(000)                                      | 520.0                                                         |
| Crystal size/mm <sup>3</sup>                | 0.57 × 0.128 × 0.072                                          |
| Radiation                                   | MoKα (λ = 0.71073)                                            |
| 2θ range for data collection/°              | 4.388 to 56.02                                                |
| Index ranges                                | -16 ≤ h ≤ 16, -6 ≤ k ≤ 6, -21 ≤ l ≤ 21                        |
| Reflections collected                       | 21905                                                         |
| Independent reflections                     | 4959 [R <sub>int</sub> = 0.0605, R <sub>sigma</sub> = 0.0459] |
| Data/restraints/parameters                  | 4959/1/307                                                    |
| Goodness-of-fit on F <sup>2</sup>           | 1.079                                                         |
| Final R indexes [I ≥ 2σ (I)]                | R <sub>1</sub> = 0.0471, wR <sub>2</sub> = 0.1175             |
| Final R indexes [all data]                  | R <sub>1</sub> = 0.0500, wR <sub>2</sub> = 0.1198             |
| Largest diff. peak/hole / e Å <sup>-3</sup> | 0.46/-0.48                                                    |
| Flack parameter                             | -0.03(6)                                                      |
| CCDC Number                                 | 2392097                                                       |

Crystal structure: 12

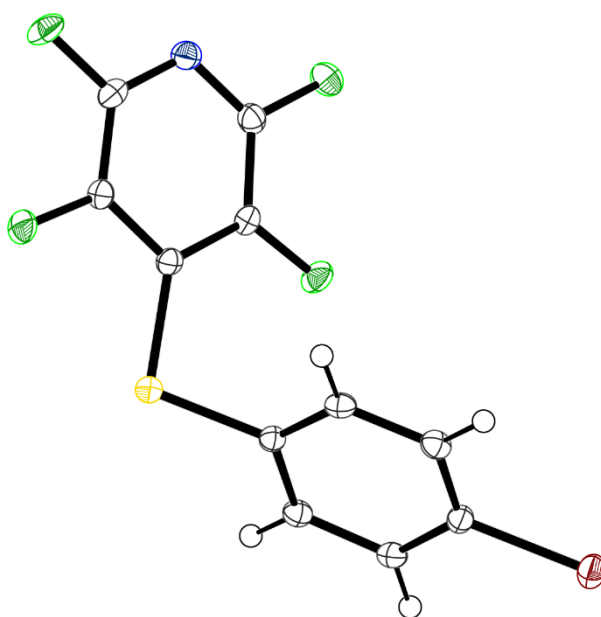

|                                             |                                                               |
|---------------------------------------------|---------------------------------------------------------------|
| Empirical formula                           | C <sub>11</sub> H <sub>4</sub> BrF <sub>4</sub> NS            |
| Formula weight                              | 338.12                                                        |
| Temperature/K                               | 120.00                                                        |
| Crystal system                              | monoclinic                                                    |
| Space group                                 | P2 <sub>1</sub> /c                                            |
| a/Å                                         | 7.5339(3)                                                     |
| b/Å                                         | 6.1598(3)                                                     |
| c/Å                                         | 23.6919(11)                                                   |
| α/°                                         | 90                                                            |
| β/°                                         | 96.1396(18)                                                   |
| γ/°                                         | 90                                                            |
| Volume/Å <sup>3</sup>                       | 1093.17(9)                                                    |
| Z                                           | 4                                                             |
| ρ <sub>calc</sub> /cm <sup>3</sup>          | 2.054                                                         |
| μ/mm <sup>-1</sup>                          | 3.983                                                         |
| F(000)                                      | 656.0                                                         |
| Crystal size/mm <sup>3</sup>                | 0.11 × 0.05 × 0.01                                            |
| Radiation                                   | Mo Kα (λ = 0.71073)                                           |
| 2θ range for data collection/°              | 5.438 to 59.988                                               |
| Index ranges                                | -10 ≤ h ≤ 10, -8 ≤ k ≤ 8, -33 ≤ l ≤ 33                        |
| Reflections collected                       | 31779                                                         |
| Independent reflections                     | 3192 [R <sub>int</sub> = 0.0476, R <sub>sigma</sub> = 0.0249] |
| Data/restraints/parameters                  | 3192/0/163                                                    |
| Goodness-of-fit on F <sup>2</sup>           | 1.056                                                         |
| Final R indexes [I ≥ 2σ (I)]                | R <sub>1</sub> = 0.0295, wR <sub>2</sub> = 0.0652             |
| Final R indexes [all data]                  | R <sub>1</sub> = 0.0374, wR <sub>2</sub> = 0.0680             |
| Largest diff. peak/hole / e Å <sup>-3</sup> | 0.43/-0.49                                                    |
| CCDC Number                                 | 2392098                                                       |

Crystal structure: **13**

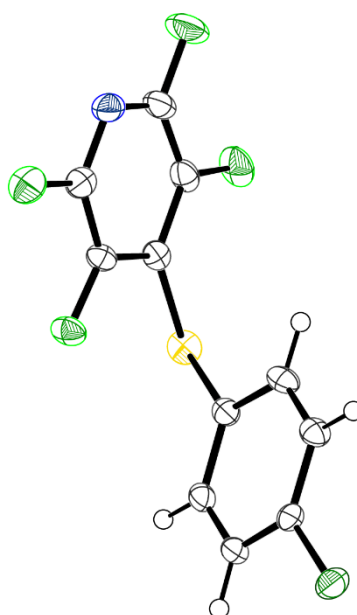

|                                             |                                                               |
|---------------------------------------------|---------------------------------------------------------------|
| Empirical formula                           | C <sub>11</sub> H <sub>4</sub> ClF <sub>4</sub> NS            |
| Formula weight                              | 293.66                                                        |
| Temperature/K                               | 120.00                                                        |
| Crystal system                              | orthorhombic                                                  |
| Space group                                 | Pca2 <sub>1</sub>                                             |
| a/Å                                         | 7.3137(2)                                                     |
| b/Å                                         | 10.9595(3)                                                    |
| c/Å                                         | 13.8535(3)                                                    |
| α/°                                         | 90                                                            |
| β/°                                         | 90                                                            |
| γ/°                                         | 90                                                            |
| Volume/Å <sup>3</sup>                       | 1110.42(5)                                                    |
| Z                                           | 4                                                             |
| ρ <sub>calc</sub> /cm <sup>3</sup>          | 1.757                                                         |
| μ/mm <sup>-1</sup>                          | 0.564                                                         |
| F(000)                                      | 584.0                                                         |
| Crystal size/mm <sup>3</sup>                | 0.33 × 0.29 × 0.09                                            |
| Radiation                                   | Mo Kα (λ = 0.71073)                                           |
| 2θ range for data collection/°              | 4.74 to 61.978                                                |
| Index ranges                                | -10 ≤ h ≤ 10, -15 ≤ k ≤ 15, -20 ≤ l ≤ 20                      |
| Reflections collected                       | 35065                                                         |
| Independent reflections                     | 3509 [R <sub>int</sub> = 0.0428, R <sub>sigma</sub> = 0.0217] |
| Data/restraints/parameters                  | 3509/1/164                                                    |
| Goodness-of-fit on F <sup>2</sup>           | 1.125                                                         |
| Final R indexes [I ≥ 2σ (I)]                | R <sub>1</sub> = 0.0288, wR <sub>2</sub> = 0.0727             |
| Final R indexes [all data]                  | R <sub>1</sub> = 0.0293, wR <sub>2</sub> = 0.0730             |
| Largest diff. peak/hole / e Å <sup>-3</sup> | 0.27/-0.20                                                    |
| Flack parameter                             | 0.01(3)                                                       |
| CCDC Number                                 | 2392099                                                       |

Crystal structure: 14

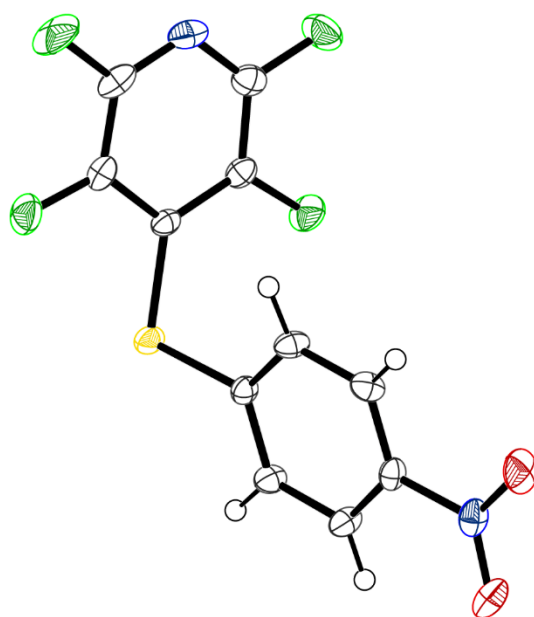

|                                             |                                                                               |
|---------------------------------------------|-------------------------------------------------------------------------------|
| Empirical formula                           | C <sub>11</sub> H <sub>4</sub> F <sub>4</sub> N <sub>2</sub> O <sub>2</sub> S |
| Formula weight                              | 304.22                                                                        |
| Temperature/K                               | 120.00                                                                        |
| Crystal system                              | monoclinic                                                                    |
| Space group                                 | Pc                                                                            |
| a/Å                                         | 5.7048(3)                                                                     |
| b/Å                                         | 12.7901(7)                                                                    |
| c/Å                                         | 7.8026(4)                                                                     |
| α/°                                         | 90                                                                            |
| β/°                                         | 90.181(2)                                                                     |
| γ/°                                         | 90                                                                            |
| Volume/Å <sup>3</sup>                       | 569.31(5)                                                                     |
| Z                                           | 2                                                                             |
| ρ <sub>calc</sub> /cm <sup>3</sup>          | 1.775                                                                         |
| μ/mm <sup>-1</sup>                          | 0.341                                                                         |
| F(000)                                      | 304.0                                                                         |
| Crystal size/mm <sup>3</sup>                | 0.19 × 0.09 × 0.02                                                            |
| Radiation                                   | Mo Kα (λ = 0.71073)                                                           |
| 2θ range for data collection/°              | 6.116 to 59.978                                                               |
| Index ranges                                | -8 ≤ h ≤ 8, -17 ≤ k ≤ 17, -10 ≤ l ≤ 10                                        |
| Reflections collected                       | 18922                                                                         |
| Independent reflections                     | 3308 [R <sub>int</sub> = 0.0342, R <sub>sigma</sub> = 0.0257]                 |
| Data/restraints/parameters                  | 3308/2/197                                                                    |
| Goodness-of-fit on F <sup>2</sup>           | 1.097                                                                         |
| Final R indexes [I ≥ 2σ(I)]                 | R <sub>1</sub> = 0.0338, wR <sub>2</sub> = 0.0742                             |
| Final R indexes [all data]                  | R <sub>1</sub> = 0.0354, wR <sub>2</sub> = 0.0749                             |
| Largest diff. peak/hole / e Å <sup>-3</sup> | 0.25/-0.19                                                                    |
| Flack parameter                             | -0.03(4)                                                                      |
| CCDC Number                                 | 2392100                                                                       |

Crystal structure: 15

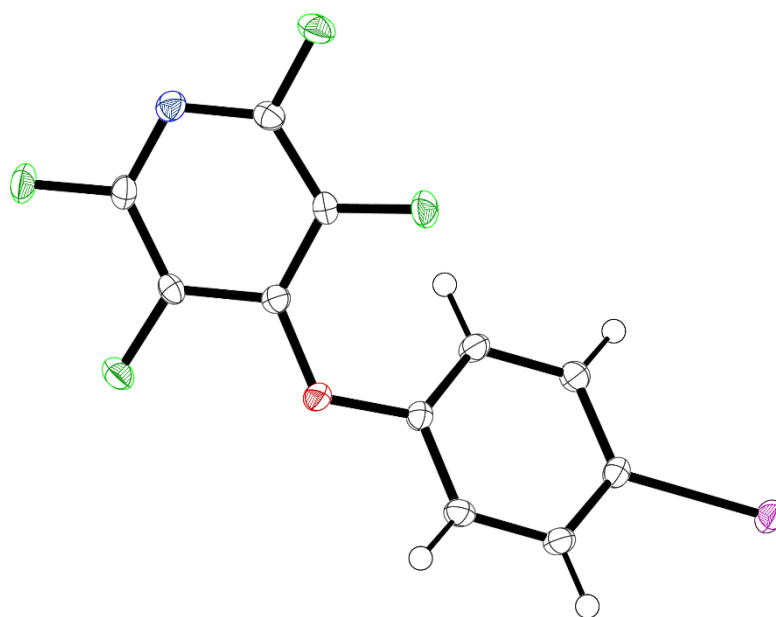

|                                             |                                                               |
|---------------------------------------------|---------------------------------------------------------------|
| Empirical formula                           | C <sub>11</sub> H <sub>4</sub> F <sub>4</sub> INO             |
| Formula weight                              | 369.05                                                        |
| Temperature/K                               | 120.00                                                        |
| Crystal system                              | monoclinic                                                    |
| Space group                                 | P2 <sub>1</sub> /n                                            |
| a/Å                                         | 13.7192(7)                                                    |
| b/Å                                         | 5.8431(3)                                                     |
| c/Å                                         | 15.2620(8)                                                    |
| α/°                                         | 90                                                            |
| β/°                                         | 115.101(2)                                                    |
| γ/°                                         | 90                                                            |
| Volume/Å <sup>3</sup>                       | 1107.90(10)                                                   |
| Z                                           | 4                                                             |
| ρ <sub>calc</sub> /cm <sup>3</sup>          | 2.213                                                         |
| μ/mm <sup>-1</sup>                          | 2.931                                                         |
| F(000)                                      | 696.0                                                         |
| Crystal size/mm <sup>3</sup>                | 0.17 × 0.09 × 0.08                                            |
| Radiation                                   | MoKα (λ = 0.71073)                                            |
| 2θ range for data collection/°              | 5.258 to 59.982                                               |
| Index ranges                                | -19 ≤ h ≤ 19, -8 ≤ k ≤ 8, -21 ≤ l ≤ 21                        |
| Reflections collected                       | 17915                                                         |
| Independent reflections                     | 3210 [R <sub>int</sub> = 0.0261, R <sub>sigma</sub> = 0.0184] |
| Data/restraints/parameters                  | 3210/0/163                                                    |
| Goodness-of-fit on F <sup>2</sup>           | 1.120                                                         |
| Final R indexes [I ≥ 2σ (I)]                | R <sub>1</sub> = 0.0171, wR <sub>2</sub> = 0.0376             |
| Final R indexes [all data]                  | R <sub>1</sub> = 0.0190, wR <sub>2</sub> = 0.0383             |
| Largest diff. peak/hole / e Å <sup>-3</sup> | 0.44/-0.54                                                    |
| CCDC Number                                 | 2392103                                                       |

Crystal structure: 16

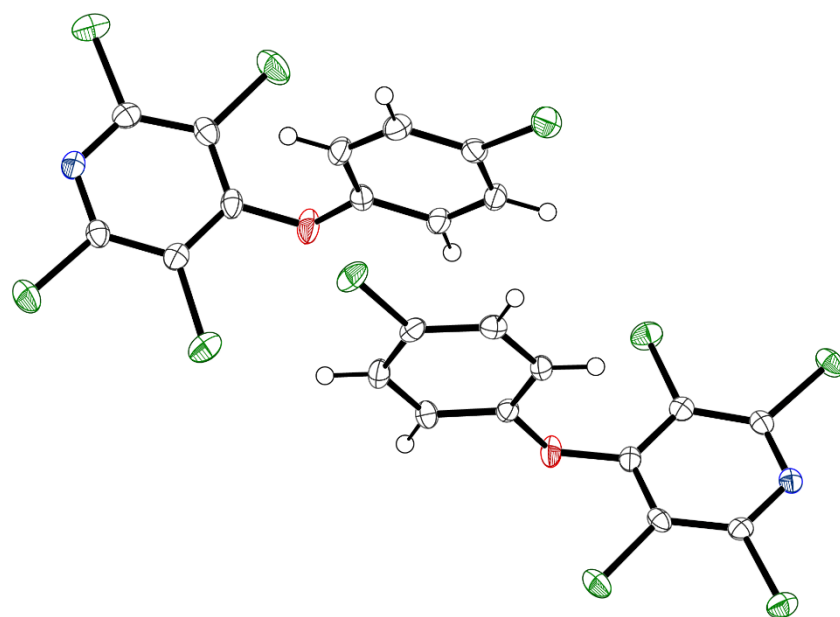

|                                             |                                                               |
|---------------------------------------------|---------------------------------------------------------------|
| Empirical formula                           | C <sub>11</sub> H <sub>4</sub> Cl <sub>5</sub> NO             |
| Formula weight                              | 343.40                                                        |
| Temperature/K                               | 120.00                                                        |
| Crystal system                              | monoclinic                                                    |
| Space group                                 | P2 <sub>1</sub> /c                                            |
| a/Å                                         | 21.5601(9)                                                    |
| b/Å                                         | 6.8474(3)                                                     |
| c/Å                                         | 17.8817(8)                                                    |
| α/°                                         | 90                                                            |
| β/°                                         | 103.405(2)                                                    |
| γ/°                                         | 90                                                            |
| Volume/Å <sup>3</sup>                       | 2567.96(19)                                                   |
| Z                                           | 8                                                             |
| ρ <sub>calc</sub> /cm <sup>3</sup>          | 1.776                                                         |
| μ/mm <sup>-1</sup>                          | 1.113                                                         |
| F(000)                                      | 1360.0                                                        |
| Crystal size/mm <sup>3</sup>                | 0.23 × 0.19 × 0.19                                            |
| Radiation                                   | MoKα (λ = 0.71073)                                            |
| 2θ range for data collection/°              | 4.636 to 59.994                                               |
| Index ranges                                | -30 ≤ h ≤ 30, -9 ≤ k ≤ 9, -25 ≤ l ≤ 25                        |
| Reflections collected                       | 42676                                                         |
| Independent reflections                     | 7462 [R <sub>int</sub> = 0.0305, R <sub>sigma</sub> = 0.0230] |
| Data/restraints/parameters                  | 7462/0/325                                                    |
| Goodness-of-fit on F <sup>2</sup>           | 1.074                                                         |
| Final R indexes [I ≥ 2σ (I)]                | R <sub>1</sub> = 0.0314, wR <sub>2</sub> = 0.0643             |
| Final R indexes [all data]                  | R <sub>1</sub> = 0.0380, wR <sub>2</sub> = 0.0672             |
| Largest diff. peak/hole / e Å <sup>-3</sup> | 0.42/-0.34                                                    |
| CCDC Number                                 | 2392101                                                       |

Crystal structure: 17

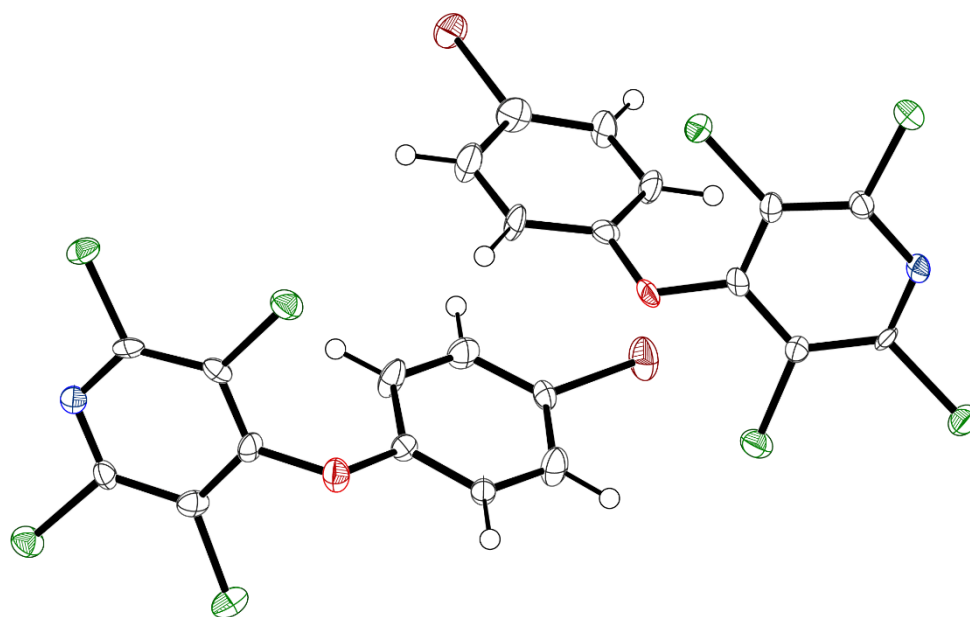

|                                             |                                                               |
|---------------------------------------------|---------------------------------------------------------------|
| Empirical formula                           | C <sub>11</sub> H <sub>4</sub> BrCl <sub>4</sub> NO           |
| Formula weight                              | 387.86                                                        |
| Temperature/K                               | 120.00                                                        |
| Crystal system                              | triclinic                                                     |
| Space group                                 | P-1                                                           |
| a/Å                                         | 6.7111(4)                                                     |
| b/Å                                         | 8.4325(5)                                                     |
| c/Å                                         | 23.0864(13)                                                   |
| α/°                                         | 85.0300(18)                                                   |
| β/°                                         | 89.023(2)                                                     |
| γ/°                                         | 89.1030(19)                                                   |
| Volume/Å <sup>3</sup>                       | 1301.26(13)                                                   |
| Z                                           | 4                                                             |
| ρ <sub>calc</sub> /cm <sup>3</sup>          | 1.980                                                         |
| μ/mm <sup>-1</sup>                          | 3.963                                                         |
| F(000)                                      | 752.0                                                         |
| Crystal size/mm <sup>3</sup>                | 0.09 × 0.06 × 0.02                                            |
| Radiation                                   | Mo Kα (λ = 0.71073)                                           |
| 2θ range for data collection/°              | 4.85 to 58.998                                                |
| Index ranges                                | -9 ≤ h ≤ 9, -11 ≤ k ≤ 11, 0 ≤ l ≤ 31                          |
| Reflections collected                       | 5724                                                          |
| Independent reflections                     | 5724 [R <sub>int</sub> = 0.0403, R <sub>sigma</sub> = 0.0487] |
| Data/restraints/parameters                  | 5724/0/325                                                    |
| Goodness-of-fit on F <sup>2</sup>           | 1.132                                                         |
| Final R indexes [I ≥ 2σ(I)]                 | R <sub>1</sub> = 0.0640, wR <sub>2</sub> = 0.1592             |
| Final R indexes [all data]                  | R <sub>1</sub> = 0.0737, wR <sub>2</sub> = 0.1641             |
| Largest diff. peak/hole / e Å <sup>-3</sup> | 0.71/-1.14                                                    |
| CCDC Number                                 | 2392102                                                       |

Crystal structure: **18**

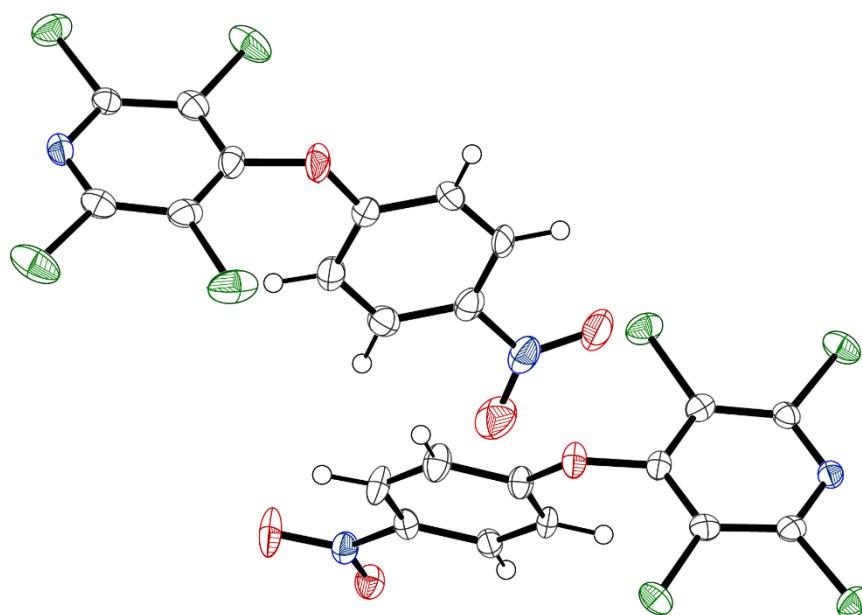

|                                             |                                                                              |
|---------------------------------------------|------------------------------------------------------------------------------|
| Empirical formula                           | C <sub>11</sub> H <sub>4</sub> Cl <sub>4</sub> N <sub>2</sub> O <sub>3</sub> |
| Formula weight                              | 353.96                                                                       |
| Temperature/K                               | 120.00                                                                       |
| Crystal system                              | triclinic                                                                    |
| Space group                                 | P-1                                                                          |
| a/Å                                         | 7.2430(4)                                                                    |
| b/Å                                         | 8.9058(5)                                                                    |
| c/Å                                         | 22.1478(12)                                                                  |
| α/°                                         | 85.007(2)                                                                    |
| β/°                                         | 88.544(2)                                                                    |
| γ/°                                         | 68.139(2)                                                                    |
| Volume/Å <sup>3</sup>                       | 1320.83(13)                                                                  |
| Z                                           | 4                                                                            |
| ρ <sub>calc</sub> /cm <sup>3</sup>          | 1.780                                                                        |
| μ/mm <sup>-1</sup>                          | 0.902                                                                        |
| F(000)                                      | 704.0                                                                        |
| Crystal size/mm <sup>3</sup>                | 0.09 × 0.08 × 0.07                                                           |
| Radiation                                   | MoKα (λ = 0.71073)                                                           |
| 2θ range for data collection/°              | 4.946 to 59.998                                                              |
| Index ranges                                | -9 ≤ h ≤ 10, -12 ≤ k ≤ 12, -31 ≤ l ≤ 31                                      |
| Reflections collected                       | 23006                                                                        |
| Independent reflections                     | 7672 [R <sub>int</sub> = 0.0626, R <sub>sigma</sub> = 0.0937]                |
| Data/restraints/parameters                  | 7672/0/361                                                                   |
| Goodness-of-fit on F <sup>2</sup>           | 1.051                                                                        |
| Final R indexes [I ≥ 2σ (I)]                | R <sub>1</sub> = 0.0708, wR <sub>2</sub> = 0.1339                            |
| Final R indexes [all data]                  | R <sub>1</sub> = 0.1228, wR <sub>2</sub> = 0.1545                            |
| Largest diff. peak/hole / e Å <sup>-3</sup> | 0.40/-0.53                                                                   |
| CCDC Number                                 | 2392104                                                                      |

Crystal structure: **19**

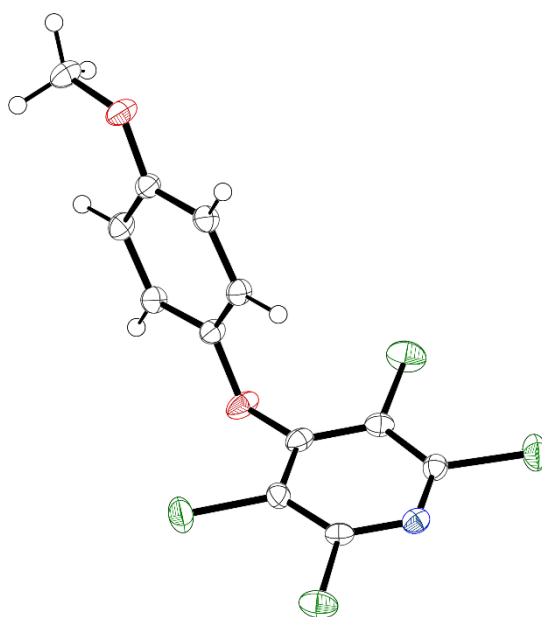

|                                    |                                                                |
|------------------------------------|----------------------------------------------------------------|
| Empirical formula                  | C <sub>12</sub> H <sub>7</sub> Cl <sub>4</sub> NO <sub>2</sub> |
| Formula weight                     | 338.99                                                         |
| Temperature/K                      | 120.00                                                         |
| Crystal system                     | monoclinic                                                     |
| Space group                        | P2 <sub>1</sub> /c                                             |
| a/Å                                | 6.7939(2)                                                      |
| b/Å                                | 21.8618(7)                                                     |
| c/Å                                | 8.9954(3)                                                      |
| α/°                                | 90                                                             |
| β/°                                | 96.7060(10)                                                    |
| γ/°                                | 90                                                             |
| Volume/Å <sup>3</sup>              | 1326.92(7)                                                     |
| Z                                  | 4                                                              |
| ρ <sub>calc</sub> /cm <sup>3</sup> | 1.697                                                          |
| μ/mm <sup>-1</sup>                 | 0.886                                                          |
| F(000)                             | 680.0                                                          |
| Crystal size/mm <sup>3</sup>       | 0.16 × 0.12 × 0.11                                             |
| Radiation                          | MoKα (λ = 0.71073)                                             |
| 2θ range for data collection/°     | 4.926 to 59.98                                                 |
| Index ranges                       | -9 ≤ h ≤ 9, -30 ≤ k ≤ 30, -12 ≤ l ≤ 12                         |
| Reflections collected              | 22731                                                          |
| Independent reflections            | 3863 [R <sub>int</sub> = 0.0350, R <sub>sigma</sub> = 0.0262]  |
| Data/restraints/parameters         | 3863/0/173                                                     |
| Goodness-of-fit on F <sup>2</sup>  | 1.049                                                          |
| Final R indexes [I ≥ 2σ (I)]       | R <sub>1</sub> = 0.0306, wR <sub>2</sub> = 0.0617              |
| Final R indexes [all data]         | R <sub>1</sub> = 0.0411, wR <sub>2</sub> = 0.0663              |
| CCDC Number                        | 2392105                                                        |

Crystal structure: 20

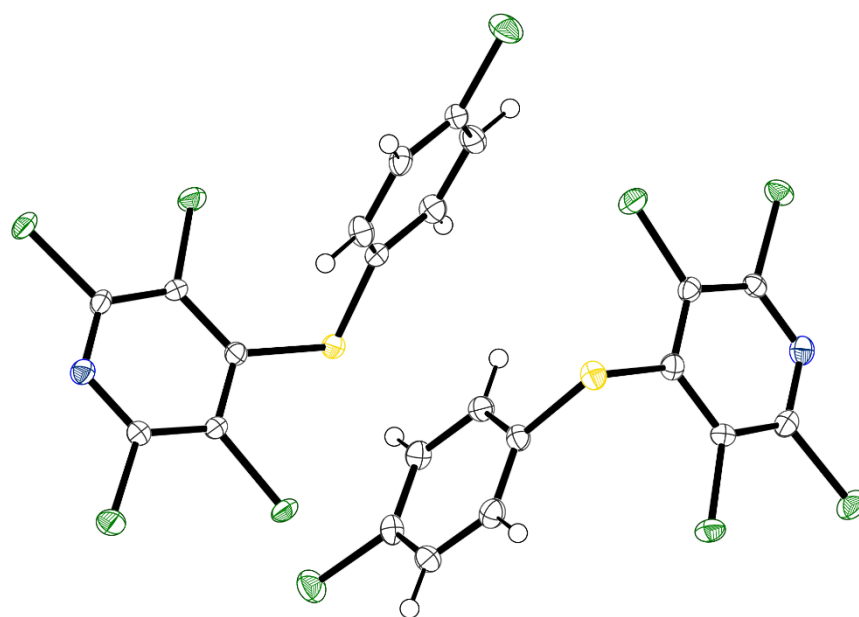

|                                             |                                                               |
|---------------------------------------------|---------------------------------------------------------------|
| Empirical formula                           | C <sub>11</sub> H <sub>4</sub> Cl <sub>5</sub> NS             |
| Formula weight                              | 359.46                                                        |
| Temperature/K                               | 120.00                                                        |
| Crystal system                              | monoclinic                                                    |
| Space group                                 | P2 <sub>1</sub> /c                                            |
| a/Å                                         | 22.3918(10)                                                   |
| b/Å                                         | 7.0830(3)                                                     |
| c/Å                                         | 17.1257(8)                                                    |
| α/°                                         | 90                                                            |
| β/°                                         | 105.912(2)                                                    |
| γ/°                                         | 90                                                            |
| Volume/Å <sup>3</sup>                       | 2612.1(2)                                                     |
| Z                                           | 8                                                             |
| ρ <sub>calc</sub> /cm <sup>3</sup>          | 1.828                                                         |
| μ/mm <sup>-1</sup>                          | 1.247                                                         |
| F(000)                                      | 1424.0                                                        |
| Crystal size/mm <sup>3</sup>                | 0.15 × 0.12 × 0.11                                            |
| Radiation                                   | MoKα (λ = 0.71073)                                            |
| 2θ range for data collection/°              | 4.788 to 58.998                                               |
| Index ranges                                | -31 ≤ h ≤ 31, -9 ≤ k ≤ 9, -23 ≤ l ≤ 23                        |
| Reflections collected                       | 42120                                                         |
| Independent reflections                     | 7267 [R <sub>int</sub> = 0.0558, R <sub>sigma</sub> = 0.0445] |
| Data/restraints/parameters                  | 7267/0/325                                                    |
| Goodness-of-fit on F <sup>2</sup>           | 1.072                                                         |
| Final R indexes [I ≥ 2σ (I)]                | R <sub>1</sub> = 0.0605, wR <sub>2</sub> = 0.1453             |
| Final R indexes [all data]                  | R <sub>1</sub> = 0.0784, wR <sub>2</sub> = 0.1561             |
| Largest diff. peak/hole / e Å <sup>-3</sup> | 2.27/-0.67                                                    |
| CCDC Number                                 | 2392106                                                       |

Crystal structure: **21**

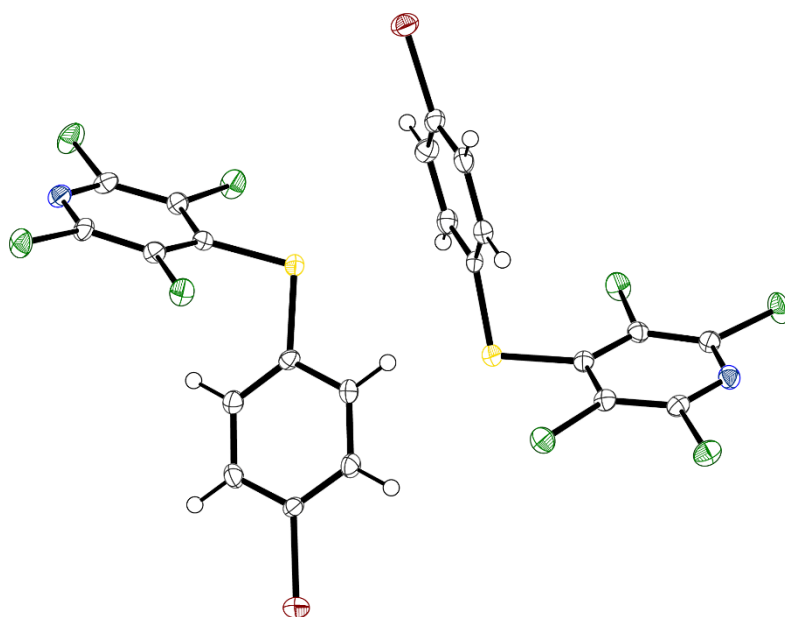

|                                             |                                                               |
|---------------------------------------------|---------------------------------------------------------------|
| Empirical formula                           | C <sub>11</sub> H <sub>4</sub> BrCl <sub>4</sub> NS           |
| Formula weight                              | 403.92                                                        |
| Temperature/K                               | 120.00                                                        |
| Crystal system                              | monoclinic                                                    |
| Space group                                 | P2 <sub>1</sub> /c                                            |
| a/Å                                         | 21.9683(7)                                                    |
| b/Å                                         | 7.1152(2)                                                     |
| c/Å                                         | 17.1369(6)                                                    |
| α/°                                         | 90                                                            |
| β/°                                         | 96.4090(10)                                                   |
| γ/°                                         | 90                                                            |
| Volume/Å <sup>3</sup>                       | 2661.91(15)                                                   |
| Z                                           | 8                                                             |
| ρ <sub>calc</sub> /cm <sup>3</sup>          | 2.016                                                         |
| μ/mm <sup>-1</sup>                          | 4.025                                                         |
| F(000)                                      | 1568.0                                                        |
| Crystal size/mm <sup>3</sup>                | 0.11 × 0.1 × 0.06                                             |
| Radiation                                   | MoKα (λ = 0.71073)                                            |
| 2θ range for data collection/°              | 4.784 to 59.996                                               |
| Index ranges                                | -30 ≤ h ≤ 30, -10 ≤ k ≤ 10, -24 ≤ l ≤ 24                      |
| Reflections collected                       | 44716                                                         |
| Independent reflections                     | 7735 [R <sub>int</sub> = 0.0571, R <sub>sigma</sub> = 0.0490] |
| Data/restraints/parameters                  | 7735/0/325                                                    |
| Goodness-of-fit on F <sup>2</sup>           | 0.831                                                         |
| Final R indexes [I ≥ 2σ(I)]                 | R <sub>1</sub> = 0.0399, wR <sub>2</sub> = 0.1097             |
| Final R indexes [all data]                  | R <sub>1</sub> = 0.0619, wR <sub>2</sub> = 0.1263             |
| Largest diff. peak/hole / e Å <sup>-3</sup> | 0.94/-1.02                                                    |
| CCDC Number                                 | 2392107                                                       |

Crystal structure: **22**

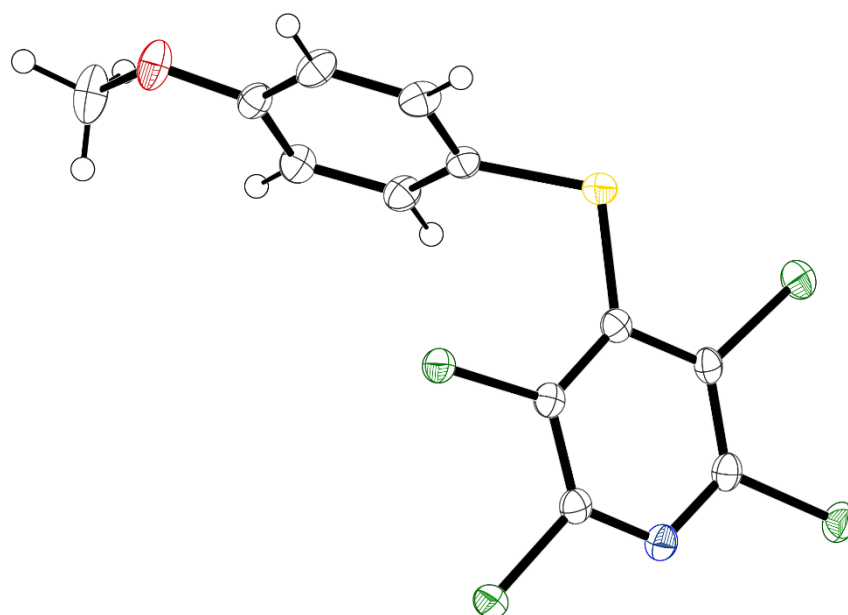

|                                             |                                                               |
|---------------------------------------------|---------------------------------------------------------------|
| Empirical formula                           | C <sub>12</sub> H <sub>7</sub> Cl <sub>4</sub> NOS            |
| Formula weight                              | 355.05                                                        |
| Temperature/K                               | 120.00                                                        |
| Crystal system                              | orthorhombic                                                  |
| Space group                                 | P2 <sub>1</sub> 2 <sub>1</sub> 2 <sub>1</sub>                 |
| a/Å                                         | 5.6490(2)                                                     |
| b/Å                                         | 11.5028(5)                                                    |
| c/Å                                         | 20.9664(9)                                                    |
| α/°                                         | 90                                                            |
| β/°                                         | 90                                                            |
| γ/°                                         | 90                                                            |
| Volume/Å <sup>3</sup>                       | 1362.38(10)                                                   |
| Z                                           | 4                                                             |
| ρ <sub>calc</sub> /cm <sup>3</sup>          | 1.731                                                         |
| μ/mm <sup>-1</sup>                          | 1.010                                                         |
| F(000)                                      | 712.0                                                         |
| Crystal size/mm <sup>3</sup>                | 0.24 × 0.09 × 0.08                                            |
| Radiation                                   | MoKα (λ = 0.71073)                                            |
| 2θ range for data collection/°              | 5.258 to 59.998                                               |
| Index ranges                                | -7 ≤ h ≤ 7, -16 ≤ k ≤ 16, -29 ≤ l ≤ 29                        |
| Reflections collected                       | 23608                                                         |
| Independent reflections                     | 3958 [R <sub>int</sub> = 0.0606, R <sub>sigma</sub> = 0.0498] |
| Data/restraints/parameters                  | 3958/0/173                                                    |
| Goodness-of-fit on F <sup>2</sup>           | 1.020                                                         |
| Final R indexes [I ≥ 2σ(I)]                 | R <sub>1</sub> = 0.0351, wR <sub>2</sub> = 0.0661             |
| Final R indexes [all data]                  | R <sub>1</sub> = 0.0464, wR <sub>2</sub> = 0.0708             |
| Largest diff. peak/hole / e Å <sup>-3</sup> | 0.33/-0.29                                                    |
| Flack parameter                             | 0.05(4)                                                       |
| CCDC Number                                 | 2392108                                                       |

Crystal structure: **23**

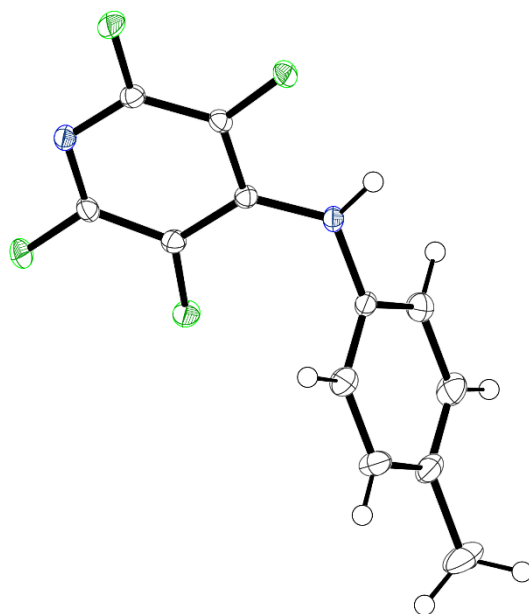

|                                             |                                                               |
|---------------------------------------------|---------------------------------------------------------------|
| Empirical formula                           | C <sub>12</sub> H <sub>8</sub> F <sub>4</sub> N <sub>2</sub>  |
| Formula weight                              | 256.20                                                        |
| Temperature/K                               | 120.00                                                        |
| Crystal system                              | orthorhombic                                                  |
| Space group                                 | Pbca                                                          |
| a/Å                                         | 12.9519(4)                                                    |
| b/Å                                         | 6.4097(2)                                                     |
| c/Å                                         | 25.6755(8)                                                    |
| α/°                                         | 90                                                            |
| β/°                                         | 90                                                            |
| γ/°                                         | 90                                                            |
| Volume/Å <sup>3</sup>                       | 2131.52(11)                                                   |
| Z                                           | 8                                                             |
| ρ <sub>calc</sub> /cm <sup>3</sup>          | 1.597                                                         |
| μ/mm <sup>-1</sup>                          | 0.146                                                         |
| F(000)                                      | 1040.0                                                        |
| Crystal size/mm <sup>3</sup>                | 0.21 × 0.16 × 0.08                                            |
| Radiation                                   | Mo Kα (λ = 0.71073)                                           |
| 2θ range for data collection/°              | 4.468 to 60                                                   |
| Index ranges                                | -18 ≤ h ≤ 18, -9 ≤ k ≤ 9, -36 ≤ l ≤ 36                        |
| Reflections collected                       | 46746                                                         |
| Independent reflections                     | 3100 [R <sub>int</sub> = 0.0451, R <sub>sigma</sub> = 0.0175] |
| Data/restraints/parameters                  | 3100/0/195                                                    |
| Goodness-of-fit on F <sup>2</sup>           | 1.190                                                         |
| Final R indexes [I ≥ 2σ (I)]                | R <sub>1</sub> = 0.0535, wR <sub>2</sub> = 0.1159             |
| Final R indexes [all data]                  | R <sub>1</sub> = 0.0588, wR <sub>2</sub> = 0.1186             |
| Largest diff. peak/hole / e Å <sup>-3</sup> | 0.42/-0.27                                                    |
| CCDC Number                                 | 2392109                                                       |

Crystal structure: **24**

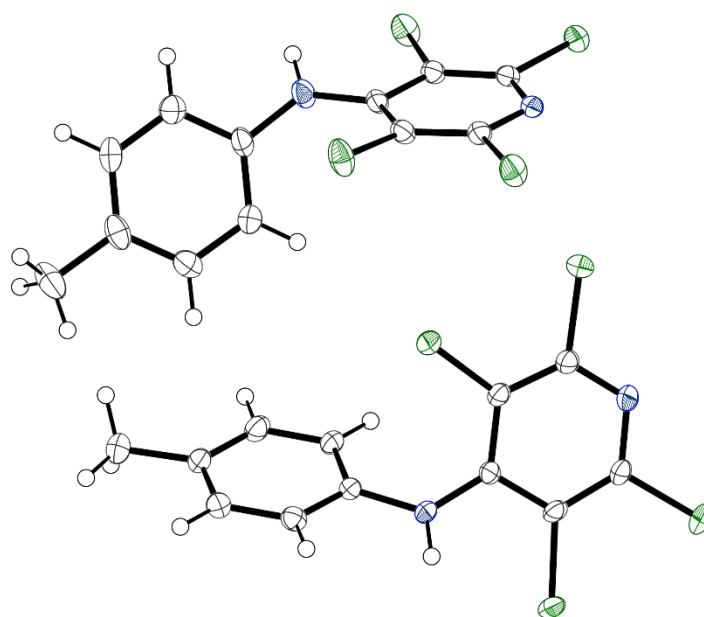

|                                             |                                                               |
|---------------------------------------------|---------------------------------------------------------------|
| Empirical formula                           | C <sub>12</sub> H <sub>8</sub> Cl <sub>4</sub> N <sub>2</sub> |
| Formula weight                              | 322.00                                                        |
| Temperature/K                               | 120.00                                                        |
| Crystal system                              | triclinic                                                     |
| Space group                                 | P-1                                                           |
| a/Å                                         | 9.7059(7)                                                     |
| b/Å                                         | 10.6772(7)                                                    |
| c/Å                                         | 13.8788(9)                                                    |
| α/°                                         | 105.635(3)                                                    |
| β/°                                         | 90.491(3)                                                     |
| γ/°                                         | 107.122(2)                                                    |
| Volume/Å <sup>3</sup>                       | 1317.63(16)                                                   |
| Z                                           | 4                                                             |
| ρ <sub>calc</sub> /cm <sup>3</sup>          | 1.623                                                         |
| μ/mm <sup>-1</sup>                          | 0.879                                                         |
| F(000)                                      | 648.0                                                         |
| Crystal size/mm <sup>3</sup>                | 0.23 × 0.13 × 0.1                                             |
| Radiation                                   | MoKα (λ = 0.71073)                                            |
| 2θ range for data collection/°              | 4.164 to 59.998                                               |
| Index ranges                                | -13 ≤ h ≤ 13, -15 ≤ k ≤ 14, -19 ≤ l ≤ 19                      |
| Reflections collected                       | 22710                                                         |
| Independent reflections                     | 7645 [R <sub>int</sub> = 0.0508, R <sub>sigma</sub> = 0.0606] |
| Data/restraints/parameters                  | 7645/0/335                                                    |
| Goodness-of-fit on F <sup>2</sup>           | 1.038                                                         |
| Final R indexes [I ≥ 2σ (I)]                | R <sub>1</sub> = 0.0526, wR <sub>2</sub> = 0.1129             |
| Final R indexes [all data]                  | R <sub>1</sub> = 0.0741, wR <sub>2</sub> = 0.1234             |
| Largest diff. peak/hole / e Å <sup>-3</sup> | 0.49/-0.55                                                    |
| CCDC Number                                 | 2392110                                                       |

Crystal structure: 25

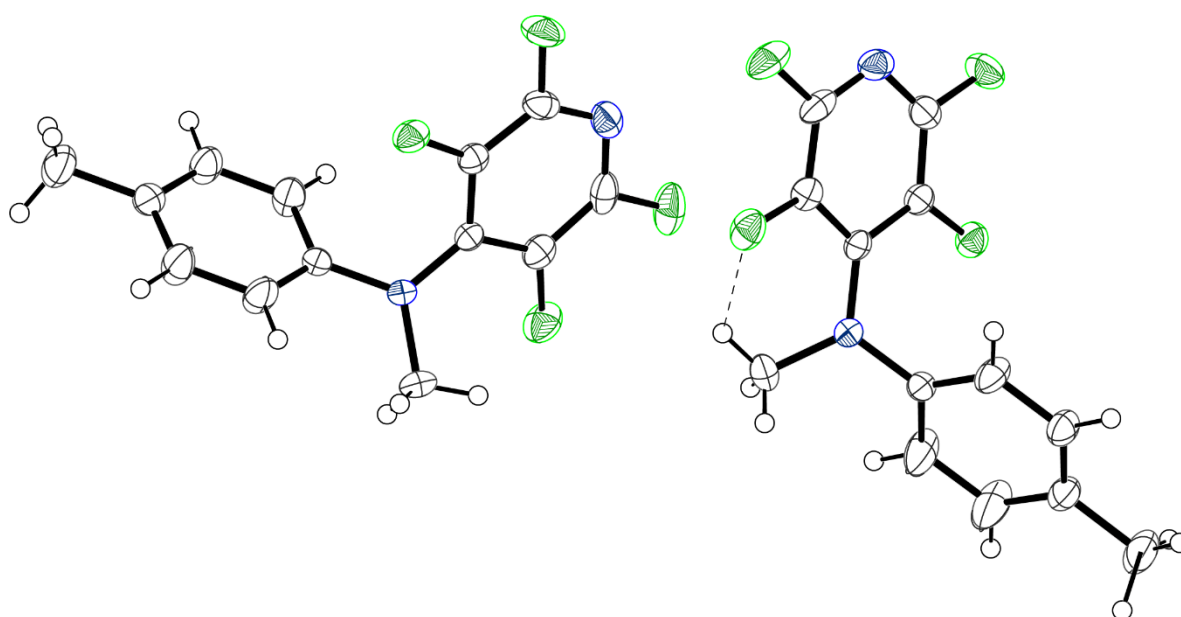

|                                             |                                                               |
|---------------------------------------------|---------------------------------------------------------------|
| Empirical formula                           | C <sub>13</sub> H <sub>10</sub> F <sub>4</sub> N <sub>2</sub> |
| Formula weight                              | 270.23                                                        |
| Temperature/K                               | 120.00                                                        |
| Crystal system                              | monoclinic                                                    |
| Space group                                 | P2 <sub>1</sub> /c                                            |
| a/Å                                         | 29.157(3)                                                     |
| b/Å                                         | 4.9301(5)                                                     |
| c/Å                                         | 16.9166(18)                                                   |
| α/°                                         | 90                                                            |
| β/°                                         | 102.455(4)                                                    |
| γ/°                                         | 90                                                            |
| Volume/Å <sup>3</sup>                       | 2374.5(4)                                                     |
| Z                                           | 8                                                             |
| ρ <sub>calc</sub> /cm <sup>3</sup>          | 1.512                                                         |
| μ/mm <sup>-1</sup>                          | 0.135                                                         |
| F(000)                                      | 1104.0                                                        |
| Crystal size/mm <sup>3</sup>                | 0.81 × 0.09 × 0.06                                            |
| Radiation                                   | MoKα (λ = 0.71073)                                            |
| 2θ range for data collection/°              | 4.292 to 51.984                                               |
| Index ranges                                | -35 ≤ h ≤ 35, -6 ≤ k ≤ 6, -20 ≤ l ≤ 20                        |
| Reflections collected                       | 29615                                                         |
| Independent reflections                     | 4648 [R <sub>int</sub> = 0.0815, R <sub>sigma</sub> = 0.0571] |
| Data/restraints/parameters                  | 4648/534/347                                                  |
| Goodness-of-fit on F <sup>2</sup>           | 1.049                                                         |
| Final R indexes [I ≥ 2σ (I)]                | R <sub>1</sub> = 0.0612, wR <sub>2</sub> = 0.1204             |
| Final R indexes [all data]                  | R <sub>1</sub> = 0.0931, wR <sub>2</sub> = 0.1350             |
| Largest diff. peak/hole / e Å <sup>-3</sup> | 0.27/-0.29                                                    |
| CCDC Number                                 | 2392111                                                       |

Crystal structure: 26

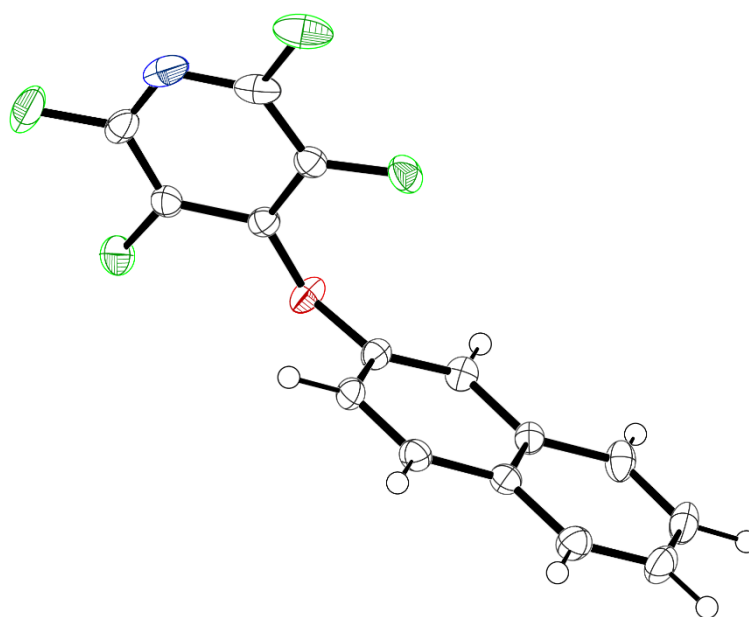

|                                             |                                                               |
|---------------------------------------------|---------------------------------------------------------------|
| Empirical formula                           | C <sub>15</sub> H <sub>7</sub> F <sub>4</sub> NO              |
| Formula weight                              | 293.22                                                        |
| Temperature/K                               | 120.0                                                         |
| Crystal system                              | orthorhombic                                                  |
| Space group                                 | P2 <sub>1</sub> 2 <sub>1</sub> 2 <sub>1</sub>                 |
| a/Å                                         | 5.4538(2)                                                     |
| b/Å                                         | 9.2473(3)                                                     |
| c/Å                                         | 24.0778(8)                                                    |
| α/°                                         | 90                                                            |
| β/°                                         | 90                                                            |
| γ/°                                         | 90                                                            |
| Volume/Å <sup>3</sup>                       | 1214.31(7)                                                    |
| Z                                           | 4                                                             |
| ρ <sub>calc</sub> /cm <sup>3</sup>          | 1.604                                                         |
| μ/mm <sup>-1</sup>                          | 0.143                                                         |
| F(000)                                      | 592.0                                                         |
| Crystal size/mm <sup>3</sup>                | 0.38 × 0.21 × 0.17                                            |
| Radiation                                   | MoKα (λ = 0.71073)                                            |
| 2θ range for data collection/°              | 4.718 to 57.982                                               |
| Index ranges                                | -7 ≤ h ≤ 7, -12 ≤ k ≤ 12, -32 ≤ l ≤ 32                        |
| Reflections collected                       | 18778                                                         |
| Independent reflections                     | 3234 [R <sub>int</sub> = 0.0309, R <sub>sigma</sub> = 0.0241] |
| Data/restraints/parameters                  | 3234/0/218                                                    |
| Goodness-of-fit on F <sup>2</sup>           | 1.051                                                         |
| Final R indexes [I ≥ 2σ (I)]                | R <sub>1</sub> = 0.0327, wR <sub>2</sub> = 0.0734             |
| Final R indexes [all data]                  | R <sub>1</sub> = 0.0418, wR <sub>2</sub> = 0.0767             |
| Largest diff. peak/hole / e Å <sup>-3</sup> | 0.22/-0.18                                                    |
| Flack parameter                             | 0.35(18)                                                      |
| CCDC Number                                 | 2392112                                                       |

Crystal structure: **27** (JUTCAF)<sup>[1a]</sup>

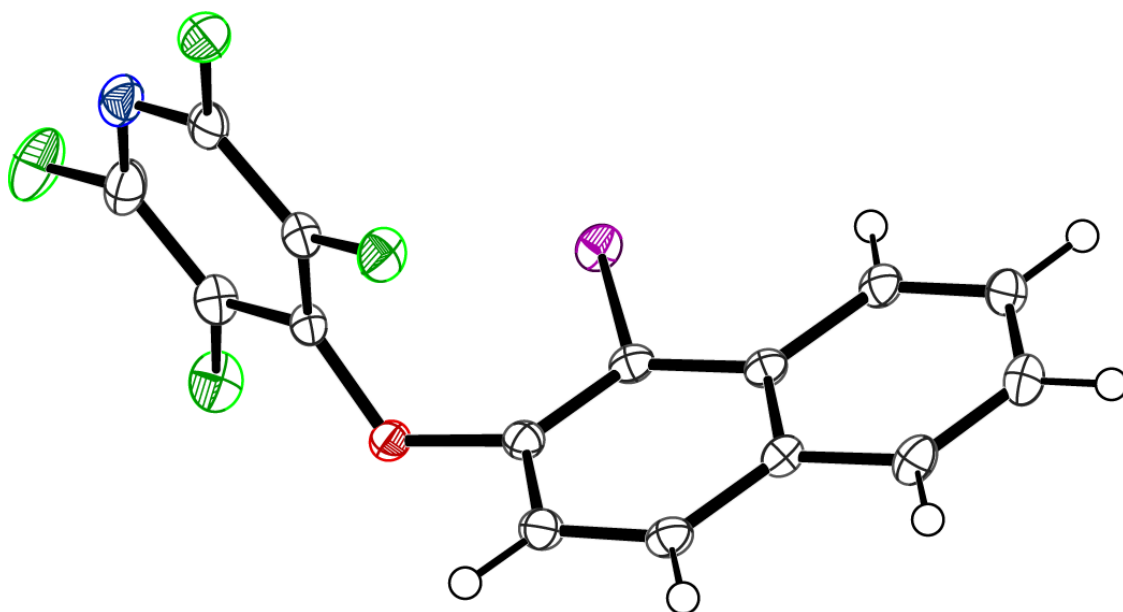

|                                             |                                                               |
|---------------------------------------------|---------------------------------------------------------------|
| Empirical formula                           | C <sub>15</sub> H <sub>6</sub> F <sub>4</sub> INO             |
| Formula weight                              | 419.11                                                        |
| Temperature/K                               | 120.0                                                         |
| Crystal system                              | monoclinic                                                    |
| Space group                                 | P2 <sub>1</sub>                                               |
| a/Å                                         | 4.6677(3)                                                     |
| b/Å                                         | 11.0185(7)                                                    |
| c/Å                                         | 13.0170(8)                                                    |
| α/°                                         | 90                                                            |
| β/°                                         | 90.865(2)                                                     |
| γ/°                                         | 90                                                            |
| Volume/Å <sup>3</sup>                       | 669.40(7)                                                     |
| Z                                           | 2                                                             |
| ρ <sub>calc</sub> /cm <sup>3</sup>          | 2.079                                                         |
| μ/mm <sup>-1</sup>                          | 2.439                                                         |
| F(000)                                      | 400.0                                                         |
| Crystal size/mm <sup>3</sup>                | 0.23 × 0.1 × 0.06                                             |
| Radiation                                   | MoKα (λ = 0.71073)                                            |
| 2θ range for data collection/°              | 6.26 to 59.99                                                 |
| Index ranges                                | -6 ≤ h ≤ 6, -15 ≤ k ≤ 15, -18 ≤ l ≤ 18                        |
| Reflections collected                       | 14627                                                         |
| Independent reflections                     | 3908 [R <sub>int</sub> = 0.0261, R <sub>sigma</sub> = 0.0228] |
| Data/restraints/parameters                  | 3908/1/199                                                    |
| Goodness-of-fit on F <sup>2</sup>           | C <sub>15</sub> H <sub>6</sub> F <sub>4</sub> INO             |
| Final R indexes [I ≥ 2σ (I)]                | 419.11                                                        |
| Final R indexes [all data]                  | 120.0                                                         |
| Largest diff. peak/hole / e Å <sup>-3</sup> | monoclinic                                                    |

Crystal structure: **28**

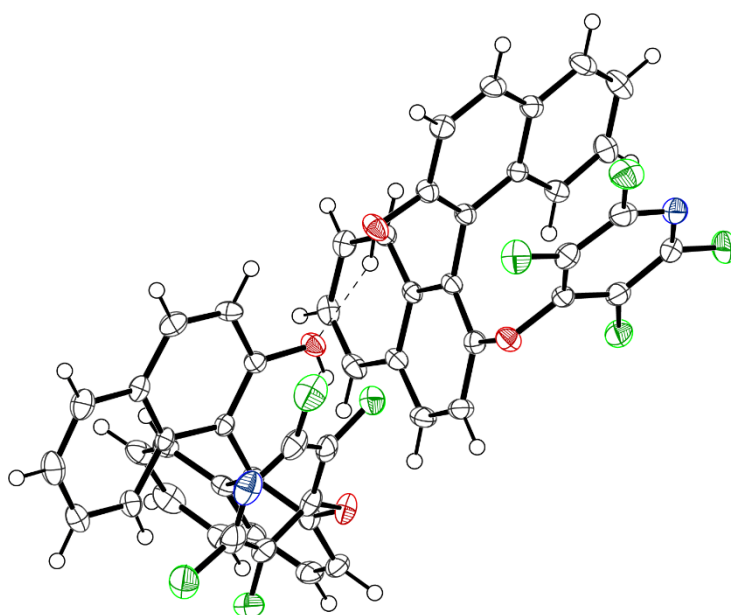

|                                             |                                                                |
|---------------------------------------------|----------------------------------------------------------------|
| Empirical formula                           | C <sub>25</sub> H <sub>13</sub> F <sub>4</sub> NO <sub>2</sub> |
| Formula weight                              | 435.36                                                         |
| Temperature/K                               | 296(2)                                                         |
| Crystal system                              | triclinic                                                      |
| Space group                                 | P-1                                                            |
| a/Å                                         | 10.7725(2)                                                     |
| b/Å                                         | 13.1234(3)                                                     |
| c/Å                                         | 15.0726(3)                                                     |
| α/°                                         | 106.6400(10)                                                   |
| β/°                                         | 101.9180(10)                                                   |
| γ/°                                         | 101.6390(10)                                                   |
| Volume/Å <sup>3</sup>                       | 1918.69(7)                                                     |
| Z                                           | 4                                                              |
| ρ <sub>calc</sub> /cm <sup>3</sup>          | 1.507                                                          |
| μ/mm <sup>-1</sup>                          | 0.122                                                          |
| F(000)                                      | 888.0                                                          |
| Crystal size/mm <sup>3</sup>                | 0.14 × 0.17 × 0.19                                             |
| Radiation                                   | MoKα (λ = 0.71073)                                             |
| 2θ range for data collection/°              | 3.636 to 59.998                                                |
| Index ranges                                | -15 ≤ h ≤ 15, -18 ≤ k ≤ 18, -21 ≤ l ≤ 21                       |
| Reflections collected                       | 33532                                                          |
| Independent reflections                     | 11124 [R <sub>int</sub> = 0.0390, R <sub>sigma</sub> = 0.0564] |
| Data/restraints/parameters                  | 11124/0/579                                                    |
| Goodness-of-fit on F <sup>2</sup>           | 1.046                                                          |
| Final R indexes [I ≥ 2σ (I)]                | R1 = 0.0567, wR2 = 0.1402                                      |
| Final R indexes [all data]                  | R1 = 0.0903, wR2 = 0.1596                                      |
| Largest diff. peak/hole / e Å <sup>-3</sup> | 0.43/-0.31                                                     |
| CCDC Number                                 | 2392113                                                        |

Crystal structure: **29** (FISJOJ)<sup>[1b]</sup>

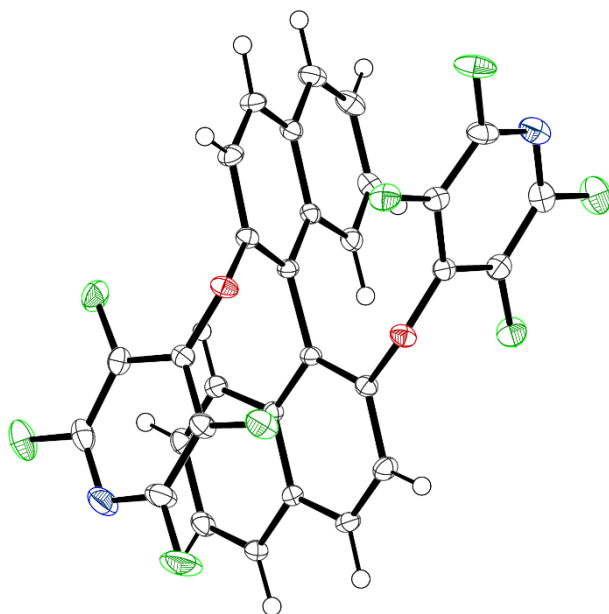

|                                             |                                                                              |
|---------------------------------------------|------------------------------------------------------------------------------|
| Empirical formula                           | C <sub>30</sub> H <sub>12</sub> F <sub>8</sub> N <sub>2</sub> O <sub>2</sub> |
| Formula weight                              | 584.42                                                                       |
| Temperature/K                               | 120.0                                                                        |
| Crystal system                              | monoclinic                                                                   |
| Space group                                 | P2 <sub>1</sub> /c                                                           |
| a/Å                                         | 13.2804(5)                                                                   |
| b/Å                                         | 8.7572(4)                                                                    |
| c/Å                                         | 21.1478(8)                                                                   |
| α/°                                         | 90                                                                           |
| β/°                                         | 106.2235(15)                                                                 |
| γ/°                                         | 90                                                                           |
| Volume/Å <sup>3</sup>                       | 2361.53(17)                                                                  |
| Z                                           | 4                                                                            |
| ρ <sub>calc</sub> /cm <sup>3</sup>          | 1.644                                                                        |
| μ/mm <sup>-1</sup>                          | 0.147                                                                        |
| F(000)                                      | 1176.0                                                                       |
| Crystal size/mm <sup>3</sup>                | 0.35 × 0.28 × 0.14                                                           |
| Radiation                                   | MoKα (λ = 0.71073)                                                           |
| 2θ range for data collection/°              | 4.374 to 58.996                                                              |
| Index ranges                                | -18 ≤ h ≤ 18, -12 ≤ k ≤ 12, -29 ≤ l ≤ 29                                     |
| Reflections collected                       | 49176                                                                        |
| Independent reflections                     | 6565 [R <sub>int</sub> = 0.0333, R <sub>sigma</sub> = 0.0211]                |
| Data/restraints/parameters                  | 6565/0/427                                                                   |
| Goodness-of-fit on F <sup>2</sup>           | 1.047                                                                        |
| Final R indexes [I ≥ 2σ (I)]                | R <sub>1</sub> = 0.0384, wR <sub>2</sub> = 0.0953                            |
| Final R indexes [all data]                  | R <sub>1</sub> = 0.0507, wR <sub>2</sub> = 0.1017                            |
| Largest diff. peak/hole / e Å <sup>-3</sup> | 0.38/-0.25                                                                   |

Crystal structure: 30

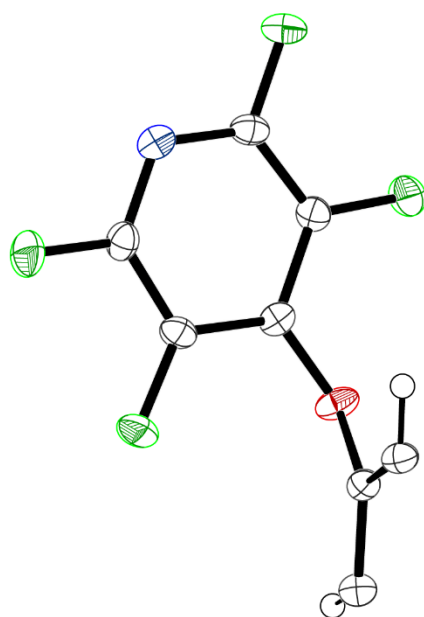

|                                             |                                                                             |
|---------------------------------------------|-----------------------------------------------------------------------------|
| Empirical formula                           | C <sub>16</sub> H <sub>4</sub> F <sub>8</sub> N <sub>2</sub> O <sub>2</sub> |
| Formula weight                              | 408.21                                                                      |
| Temperature/K                               | 120.00                                                                      |
| Crystal system                              | monoclinic                                                                  |
| Space group                                 | P2 <sub>1</sub> /c                                                          |
| a/Å                                         | 5.1719(5)                                                                   |
| b/Å                                         | 9.2296(8)                                                                   |
| c/Å                                         | 15.5250(13)                                                                 |
| α/°                                         | 90                                                                          |
| β/°                                         | 94.978(4)                                                                   |
| γ/°                                         | 90                                                                          |
| Volume/Å <sup>3</sup>                       | 738.28(11)                                                                  |
| Z                                           | 2                                                                           |
| ρ <sub>calc</sub> /cm <sup>3</sup>          | 1.836                                                                       |
| μ/mm <sup>-1</sup>                          | 0.190                                                                       |
| F(000)                                      | 404.0                                                                       |
| Crystal size/mm <sup>3</sup>                | 0.57 × 0.12 × 0.07                                                          |
| Radiation                                   | MoKα (λ = 0.71073)                                                          |
| 2θ range for data collection/°              | 5.14 to 59.996                                                              |
| Index ranges                                | -7 ≤ h ≤ 7, -12 ≤ k ≤ 12, -21 ≤ l ≤ 21                                      |
| Reflections collected                       | 11849                                                                       |
| Independent reflections                     | 2153 [R <sub>int</sub> = 0.0669, R <sub>sigma</sub> = 0.0515]               |
| Data/restraints/parameters                  | 2153/0/128                                                                  |
| Goodness-of-fit on F <sup>2</sup>           | 1.037                                                                       |
| Final R indexes [I ≥ 2σ (I)]                | R <sub>1</sub> = 0.0448, wR <sub>2</sub> = 0.1077                           |
| Final R indexes [all data]                  | R <sub>1</sub> = 0.0621, wR <sub>2</sub> = 0.1183                           |
| Largest diff. peak/hole / e Å <sup>-3</sup> | 0.45/-0.27                                                                  |
| CCDC Number                                 | 2392114                                                                     |

Crystal structure: **31**

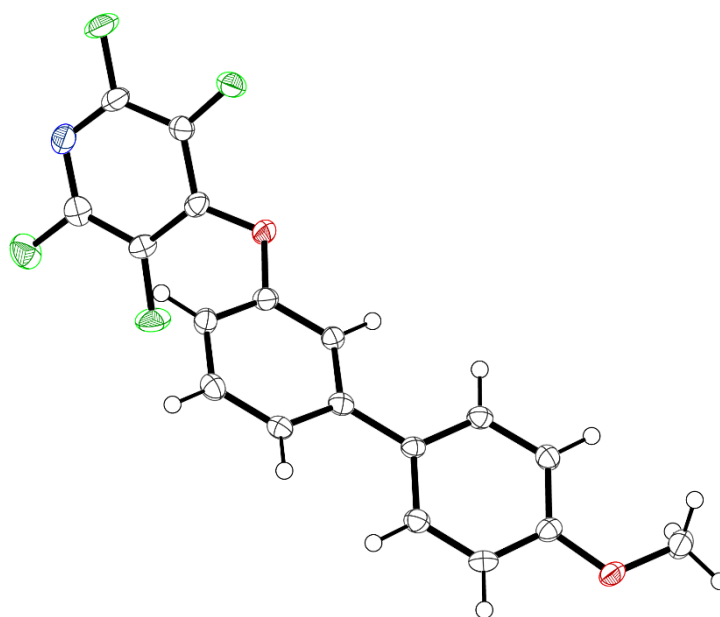

|                                             |                                                                |
|---------------------------------------------|----------------------------------------------------------------|
| Empirical formula                           | C <sub>18</sub> H <sub>11</sub> F <sub>4</sub> NO <sub>2</sub> |
| Formula weight                              | 349.28                                                         |
| Temperature/K                               | 120.00                                                         |
| Crystal system                              | monoclinic                                                     |
| Space group                                 | Cc                                                             |
| a/Å                                         | 30.6153(14)                                                    |
| b/Å                                         | 7.6257(3)                                                      |
| c/Å                                         | 6.3650(3)                                                      |
| α/°                                         | 90                                                             |
| β/°                                         | 98.846(2)                                                      |
| γ/°                                         | 90                                                             |
| Volume/Å <sup>3</sup>                       | 1468.32(11)                                                    |
| Z                                           | 4                                                              |
| ρ <sub>calc</sub> /cm <sup>3</sup>          | 1.580                                                          |
| μ/mm <sup>-1</sup>                          | 0.137                                                          |
| F(000)                                      | 712.0                                                          |
| Crystal size/mm <sup>3</sup>                | 0.26 × 0.09 × 0.07                                             |
| Radiation                                   | MoKα (λ = 0.71073)                                             |
| 2θ range for data collection/°              | 5.386 to 59.994                                                |
| Index ranges                                | -42 ≤ h ≤ 42, -10 ≤ k ≤ 10, -8 ≤ l ≤ 8                         |
| Reflections collected                       | 12144                                                          |
| Independent reflections                     | 4242 [R <sub>int</sub> = 0.0396, R <sub>sigma</sub> = 0.0517]  |
| Data/restraints/parameters                  | 4242/2/227                                                     |
| Goodness-of-fit on F <sup>2</sup>           | 1.010                                                          |
| Final R indexes [I ≥ 2σ (I)]                | R1 = 0.0458, wR2 = 0.0972                                      |
| Final R indexes [all data]                  | R1 = 0.0647, wR2 = 0.1067                                      |
| Largest diff. peak/hole / e Å <sup>-3</sup> | 0.25/-0.24                                                     |
| Flack parameter                             | -0.3(4)                                                        |
| CCDC Number                                 | 2392115                                                        |

Crystal structure: 32

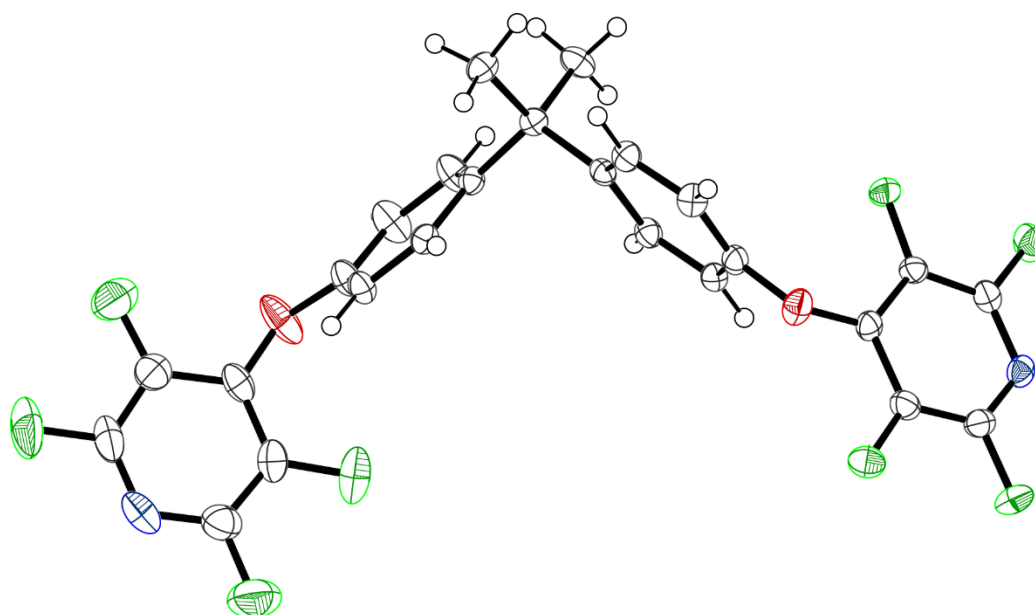

|                                             |                                                                              |
|---------------------------------------------|------------------------------------------------------------------------------|
| Empirical formula                           | C <sub>25</sub> H <sub>14</sub> F <sub>8</sub> N <sub>2</sub> O <sub>2</sub> |
| Formula weight                              | 526.38                                                                       |
| Temperature/K                               | 120.00                                                                       |
| Crystal system                              | orthorhombic                                                                 |
| Space group                                 | Pbca                                                                         |
| a/Å                                         | 8.6878(4)                                                                    |
| b/Å                                         | 10.9872(5)                                                                   |
| c/Å                                         | 46.4292(19)                                                                  |
| α/°                                         | 90                                                                           |
| β/°                                         | 90                                                                           |
| γ/°                                         | 90                                                                           |
| Volume/Å <sup>3</sup>                       | 4431.9(3)                                                                    |
| Z                                           | 8                                                                            |
| ρ <sub>calc</sub> /cm <sup>3</sup>          | 1.578                                                                        |
| μ/mm <sup>-1</sup>                          | 0.147                                                                        |
| F(000)                                      | 2128.0                                                                       |
| Crystal size/mm <sup>3</sup>                | 0.24 × 0.15 × 0.12                                                           |
| Radiation                                   | MoKα (λ = 0.71073)                                                           |
| 2θ range for data collection/°              | 5.006 to 60                                                                  |
| Index ranges                                | -12 ≤ h ≤ 12, -15 ≤ k ≤ 15, -65 ≤ l ≤ 65                                     |
| Reflections collected                       | 72251                                                                        |
| Independent reflections                     | 6452 [R <sub>int</sub> = 0.0583, R <sub>sigma</sub> = 0.0336]                |
| Data/restraints/parameters                  | 6452/0/336                                                                   |
| Goodness-of-fit on F <sup>2</sup>           | 1.120                                                                        |
| Final R indexes [I ≥ 2σ (I)]                | R <sub>1</sub> = 0.0627, wR <sub>2</sub> = 0.1129                            |
| Final R indexes [all data]                  | R <sub>1</sub> = 0.0865, wR <sub>2</sub> = 0.1218                            |
| Largest diff. peak/hole / e Å <sup>-3</sup> | 0.25/-0.32                                                                   |
| CCDC Number                                 | 2392116                                                                      |

Crystal structure: 33

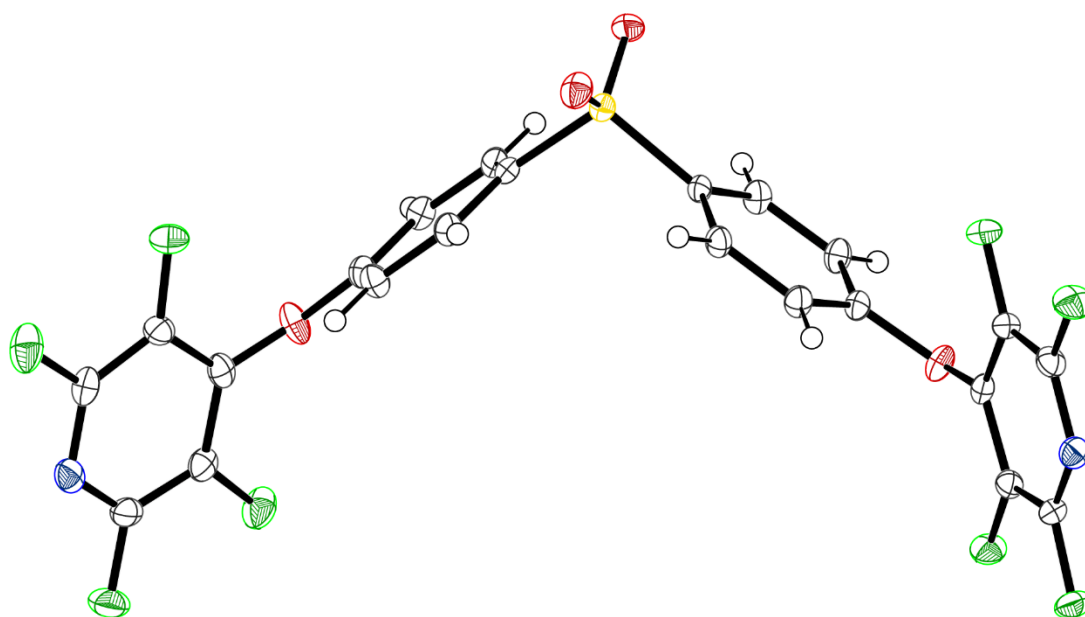

|                                             |                                                                               |
|---------------------------------------------|-------------------------------------------------------------------------------|
| Empirical formula                           | C <sub>22</sub> H <sub>8</sub> F <sub>8</sub> N <sub>2</sub> O <sub>4</sub> S |
| Formula weight                              | 548.36                                                                        |
| Temperature/K                               | 120.00                                                                        |
| Crystal system                              | monoclinic                                                                    |
| Space group                                 | C2                                                                            |
| a/Å                                         | 20.2129(8)                                                                    |
| b/Å                                         | 5.8939(2)                                                                     |
| c/Å                                         | 18.8358(8)                                                                    |
| α/°                                         | 90                                                                            |
| β/°                                         | 116.5550(10)                                                                  |
| γ/°                                         | 90                                                                            |
| Volume/Å <sup>3</sup>                       | 2007.24(14)                                                                   |
| Z                                           | 4                                                                             |
| ρ <sub>calc</sub> /cm <sup>3</sup>          | 1.815                                                                         |
| μ/mm <sup>-1</sup>                          | 0.273                                                                         |
| F(000)                                      | 1096.0                                                                        |
| Crystal size/mm <sup>3</sup>                | 0.34 × 0.16 × 0.15                                                            |
| Radiation                                   | MoKα (λ = 0.71073)                                                            |
| 2θ range for data collection/°              | 4.506 to 59.99                                                                |
| Index ranges                                | -28 ≤ h ≤ 28, -8 ≤ k ≤ 8, -26 ≤ l ≤ 26                                        |
| Reflections collected                       | 17226                                                                         |
| Independent reflections                     | 5836 [R <sub>int</sub> = 0.0533, R <sub>sigma</sub> = 0.0573]                 |
| Data/restraints/parameters                  | 5836/1/334                                                                    |
| Goodness-of-fit on F <sup>2</sup>           | 1.044                                                                         |
| Final R indexes [I ≥ 2σ (I)]                | R <sub>1</sub> = 0.0376, wR <sub>2</sub> = 0.0819                             |
| Final R indexes [all data]                  | R <sub>1</sub> = 0.0434, wR <sub>2</sub> = 0.0849                             |
| Largest diff. peak/hole / e Å <sup>-3</sup> | 0.29/-0.37                                                                    |
| Flack parameter                             | 0.12(4)                                                                       |
| CCDC Number                                 | 2392117                                                                       |

Crystal structure: **34** (JUTBUY)<sup>[1a]</sup>

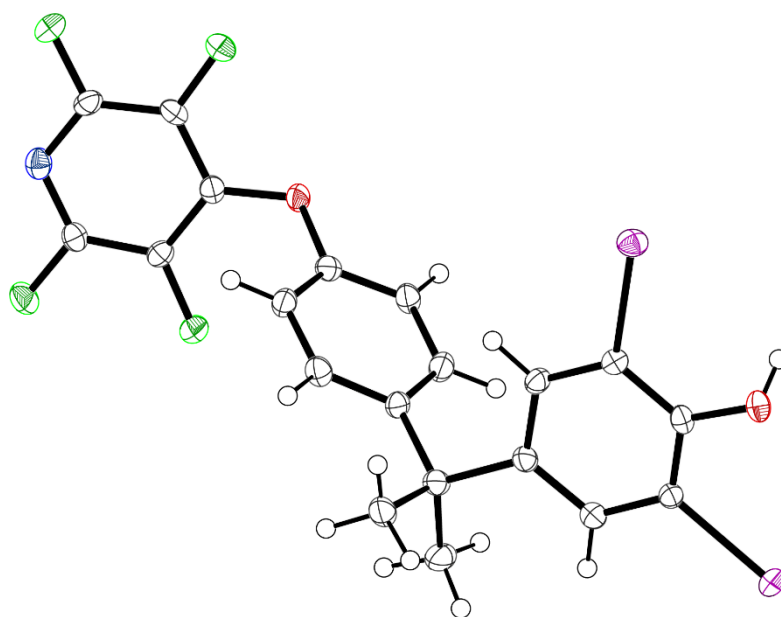

|                                             |                                                                               |
|---------------------------------------------|-------------------------------------------------------------------------------|
| Empirical formula                           | C <sub>20</sub> H <sub>13</sub> F <sub>4</sub> I <sub>2</sub> NO <sub>2</sub> |
| Formula weight                              | 629.11                                                                        |
| Temperature/K                               | 120.0                                                                         |
| Crystal system                              | monoclinic                                                                    |
| Space group                                 | P2 <sub>1</sub> /c                                                            |
| a/Å                                         | 12.3523(3)                                                                    |
| b/Å                                         | 12.7890(3)                                                                    |
| c/Å                                         | 12.8327(3)                                                                    |
| α/°                                         | 90                                                                            |
| β/°                                         | 94.170(2)                                                                     |
| γ/°                                         | 90                                                                            |
| Volume/Å <sup>3</sup>                       | 2021.86(9)                                                                    |
| Z                                           | 4                                                                             |
| ρ <sub>calc</sub> /cm <sup>3</sup>          | 2.067                                                                         |
| μ/mm <sup>-1</sup>                          | 3.163                                                                         |
| F(000)                                      | 1192.0                                                                        |
| Crystal size/mm <sup>3</sup>                | 0.38 × 0.17 × 0.15                                                            |
| Radiation                                   | MoKα (λ = 0.71073)                                                            |
| 2θ range for data collection/°              | 4.59 to 58.994                                                                |
| Index ranges                                | -16 ≤ h ≤ 17, -17 ≤ k ≤ 17, -17 ≤ l ≤ 17                                      |
| Reflections collected                       | 20412                                                                         |
| Independent reflections                     | 5635 [R <sub>int</sub> = 0.0394, R <sub>sigma</sub> = 0.0384]                 |
| Data/restraints/parameters                  | 5635/0/264                                                                    |
| Goodness-of-fit on F <sup>2</sup>           | 1.024                                                                         |
| Final R indexes [I ≥ 2σ (I)]                | R <sub>1</sub> = 0.0294, wR <sub>2</sub> = 0.0642                             |
| Final R indexes [all data]                  | R <sub>1</sub> = 0.0426, wR <sub>2</sub> = 0.0711                             |
| Largest diff. peak/hole / e Å <sup>-3</sup> | 0.81/-0.90                                                                    |

Crystal structure: 35

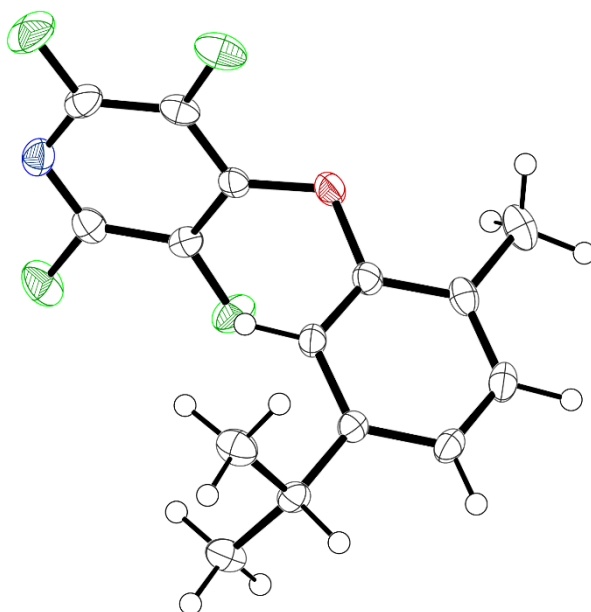

|                                             |                                                               |
|---------------------------------------------|---------------------------------------------------------------|
| Empirical formula                           | C <sub>15</sub> H <sub>13</sub> F <sub>4</sub> NO             |
| Formula weight                              | 299.26                                                        |
| Temperature/K                               | 120.00                                                        |
| Crystal system                              | monoclinic                                                    |
| Space group                                 | P2 <sub>1</sub> /n                                            |
| a/Å                                         | 9.4929(3)                                                     |
| b/Å                                         | 8.8670(3)                                                     |
| c/Å                                         | 16.6490(5)                                                    |
| α/°                                         | 90                                                            |
| β/°                                         | 102.6977(13)                                                  |
| γ/°                                         | 90                                                            |
| Volume/Å <sup>3</sup>                       | 1367.13(8)                                                    |
| Z                                           | 4                                                             |
| ρ <sub>calc</sub> /cm <sup>3</sup>          | 1.454                                                         |
| μ/mm <sup>-1</sup>                          | 0.128                                                         |
| F(000)                                      | 616.0                                                         |
| Crystal size/mm <sup>3</sup>                | 0.38 × 0.19 × 0.08                                            |
| Radiation                                   | Mo Kα (λ = 0.71073)                                           |
| 2θ range for data collection/°              | 5.522 to 59.998                                               |
| Index ranges                                | -13 ≤ h ≤ 13, -12 ≤ k ≤ 12, -23 ≤ l ≤ 23                      |
| Reflections collected                       | 31720                                                         |
| Independent reflections                     | 3980 [R <sub>int</sub> = 0.0413, R <sub>sigma</sub> = 0.0242] |
| Data/restraints/parameters                  | 3980/0/242                                                    |
| Goodness-of-fit on F <sup>2</sup>           | 1.060                                                         |
| Final R indexes [I ≥ 2σ (I)]                | R <sub>1</sub> = 0.0469, wR <sub>2</sub> = 0.1090             |
| Final R indexes [all data]                  | R <sub>1</sub> = 0.0567, wR <sub>2</sub> = 0.1146             |
| Largest diff. peak/hole / e Å <sup>-3</sup> | 0.43/-0.32                                                    |
| CCDC Number                                 | 2392118                                                       |

Crystal structure: 36

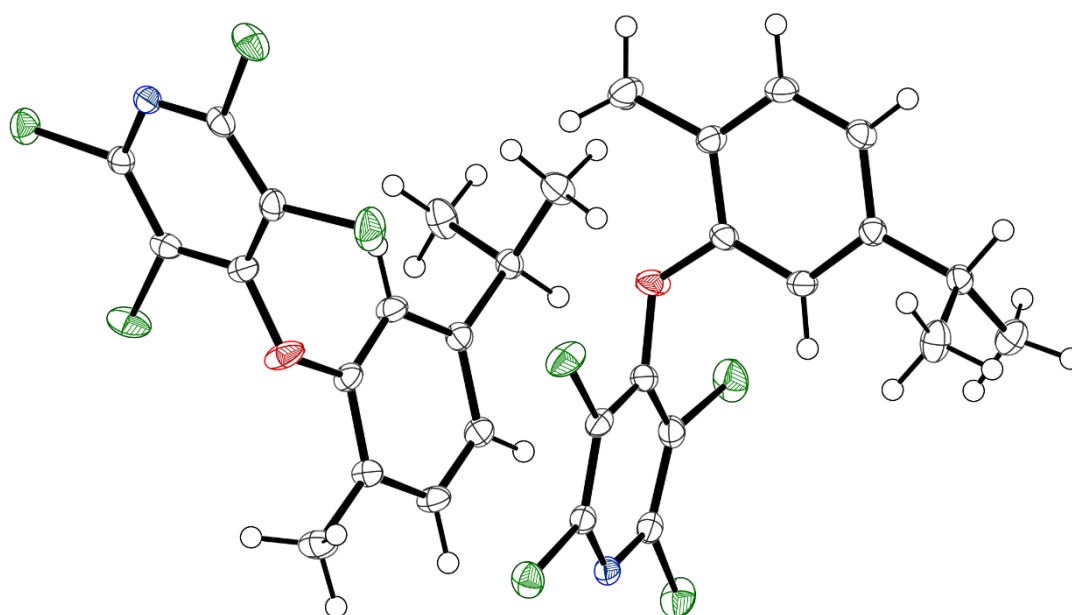

|                                             |                                                               |
|---------------------------------------------|---------------------------------------------------------------|
| Empirical formula                           | C <sub>15</sub> H <sub>13</sub> Cl <sub>4</sub> NO            |
| Formula weight                              | 365.06                                                        |
| Temperature/K                               | 120.00                                                        |
| Crystal system                              | monoclinic                                                    |
| Space group                                 | P2 <sub>1</sub> /c                                            |
| a/Å                                         | 8.8146(3)                                                     |
| b/Å                                         | 10.3821(3)                                                    |
| c/Å                                         | 17.3296(6)                                                    |
| α/°                                         | 90                                                            |
| β/°                                         | 96.9790(10)                                                   |
| γ/°                                         | 90                                                            |
| Volume/Å <sup>3</sup>                       | 1574.15(9)                                                    |
| Z                                           | 4                                                             |
| ρ <sub>calc</sub> /cm <sup>3</sup>          | 1.540                                                         |
| μ/mm <sup>-1</sup>                          | 0.748                                                         |
| F(000)                                      | 744.0                                                         |
| Crystal size/mm <sup>3</sup>                | 0.525 × 0.279 × 0.192                                         |
| Radiation                                   | MoKα (λ = 0.71073)                                            |
| 2θ range for data collection/°              | 4.582 to 60.068                                               |
| Index ranges                                | -12 ≤ h ≤ 12, -14 ≤ k ≤ 14, -24 ≤ l ≤ 24                      |
| Reflections collected                       | 26550                                                         |
| Independent reflections                     | 4600 [R <sub>int</sub> = 0.0240, R <sub>sigma</sub> = 0.0167] |
| Data/restraints/parameters                  | 4600/0/193                                                    |
| Goodness-of-fit on F <sup>2</sup>           | 1.053                                                         |
| Final R indexes [I ≥ 2σ (I)]                | R <sub>1</sub> = 0.0260, wR <sub>2</sub> = 0.0664             |
| Final R indexes [all data]                  | R <sub>1</sub> = 0.0295, wR <sub>2</sub> = 0.0683             |
| Largest diff. peak/hole / e Å <sup>-3</sup> | 0.39/-0.26                                                    |
| CCDC Number                                 | 2392119                                                       |

Crystal structure: **37**

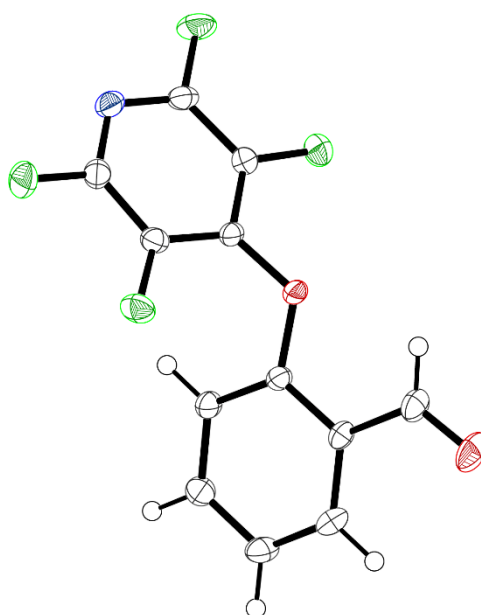

|                                             |                                                               |
|---------------------------------------------|---------------------------------------------------------------|
| Empirical formula                           | C <sub>12</sub> H <sub>5</sub> F <sub>4</sub> NO <sub>2</sub> |
| Formula weight                              | 271.17                                                        |
| Temperature/K                               | 120.00                                                        |
| Crystal system                              | triclinic                                                     |
| Space group                                 | P-1                                                           |
| a/Å                                         | 7.4513(2)                                                     |
| b/Å                                         | 7.9087(2)                                                     |
| c/Å                                         | 9.6886(3)                                                     |
| α/°                                         | 75.6080(10)                                                   |
| β/°                                         | 75.5120(10)                                                   |
| γ/°                                         | 86.7280(10)                                                   |
| Volume/Å <sup>3</sup>                       | 535.44(3)                                                     |
| Z                                           | 2                                                             |
| ρ <sub>calc</sub> /cm <sup>3</sup>          | 1.682                                                         |
| μ/mm <sup>-1</sup>                          | 0.161                                                         |
| F(000)                                      | 272.0                                                         |
| Crystal size/mm <sup>3</sup>                | 0.47 × 0.41 × 0.21                                            |
| Radiation                                   | MoKα (λ = 0.71073)                                            |
| 2θ range for data collection/°              | 4.476 to 59.992                                               |
| Index ranges                                | -10 ≤ h ≤ 10, -11 ≤ k ≤ 11, -13 ≤ l ≤ 13                      |
| Reflections collected                       | 9013                                                          |
| Independent reflections                     | 3092 [R <sub>int</sub> = 0.0257, R <sub>sigma</sub> = 0.0273] |
| Data/restraints/parameters                  | 3092/0/172                                                    |
| Goodness-of-fit on F <sup>2</sup>           | 1.035                                                         |
| Final R indexes [I ≥ 2σ (I)]                | R <sub>1</sub> = 0.0382, wR <sub>2</sub> = 0.0955             |
| Final R indexes [all data]                  | R <sub>1</sub> = 0.0435, wR <sub>2</sub> = 0.0989             |
| Largest diff. peak/hole / e Å <sup>-3</sup> | 0.38/-0.20                                                    |
| CCDC Number                                 | 2392120                                                       |

Crystal structure: **38**

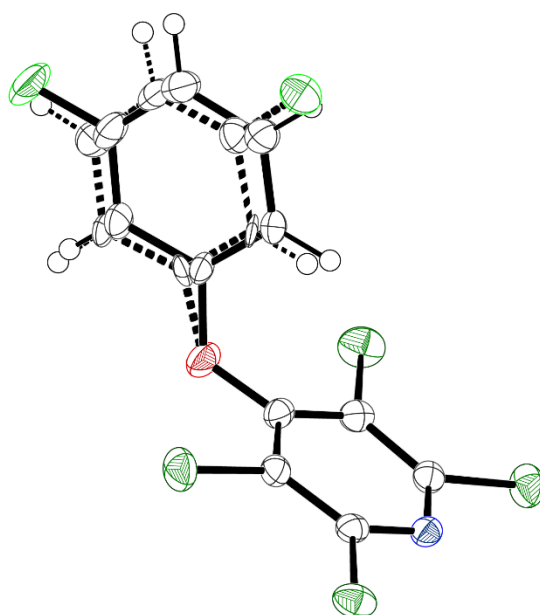

|                                             |                                                               |
|---------------------------------------------|---------------------------------------------------------------|
| Empirical formula                           | C <sub>11</sub> H <sub>4</sub> Cl <sub>4</sub> FNO            |
| Formula weight                              | 326.95                                                        |
| Temperature/K                               | 120.00                                                        |
| Crystal system                              | triclinic                                                     |
| Space group                                 | P-1                                                           |
| a/Å                                         | 6.8399(2)                                                     |
| b/Å                                         | 9.0246(2)                                                     |
| c/Å                                         | 10.6704(3)                                                    |
| α/°                                         | 100.2700(10)                                                  |
| β/°                                         | 105.4190(10)                                                  |
| γ/°                                         | 99.8220(10)                                                   |
| Volume/Å <sup>3</sup>                       | 608.05(3)                                                     |
| Z                                           | 2                                                             |
| ρ <sub>calc</sub> /cm <sup>3</sup>          | 1.786                                                         |
| μ/mm <sup>-1</sup>                          | 0.969                                                         |
| F(000)                                      | 324.0                                                         |
| Crystal size/mm <sup>3</sup>                | 0.311 × 0.23 × 0.152                                          |
| Radiation                                   | Mo Kα (λ = 0.71073)                                           |
| 2θ range for data collection/°              | 4.074 to 66.194                                               |
| Index ranges                                | -10 ≤ h ≤ 10, -13 ≤ k ≤ 13, -16 ≤ l ≤ 16                      |
| Reflections collected                       | 25078                                                         |
| Independent reflections                     | 4616 [R <sub>int</sub> = 0.0323, R <sub>sigma</sub> = 0.0246] |
| Data/restraints/parameters                  | 4616/501/227                                                  |
| Goodness-of-fit on F <sup>2</sup>           | 1.025                                                         |
| Final R indexes [I ≥ 2σ (I)]                | R <sub>1</sub> = 0.0335, wR <sub>2</sub> = 0.0813             |
| Final R indexes [all data]                  | R <sub>1</sub> = 0.0474, wR <sub>2</sub> = 0.0883             |
| Largest diff. peak/hole / e Å <sup>-3</sup> | 0.45/-0.32                                                    |
| CCDC Number                                 | 2392121                                                       |

Crystal structure: 39

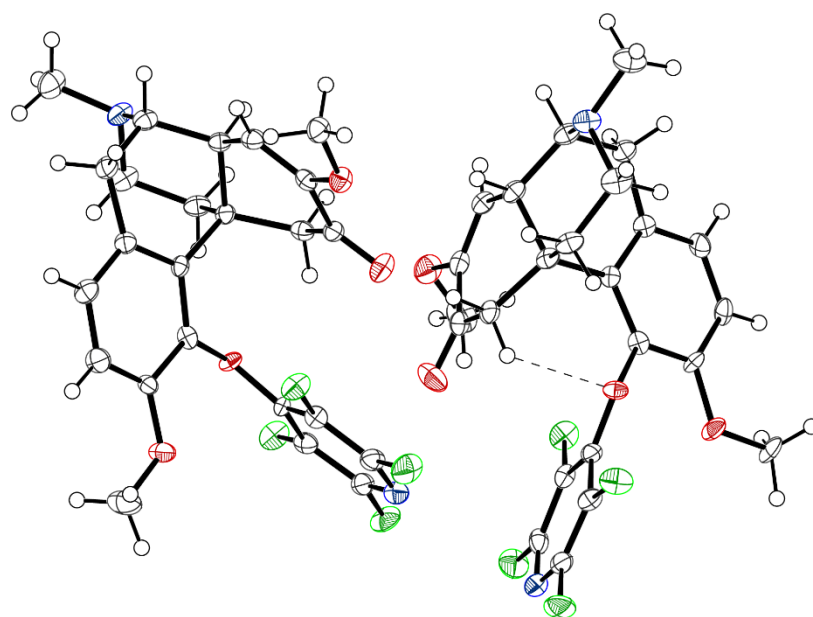

|                                             |                                                                              |
|---------------------------------------------|------------------------------------------------------------------------------|
| Empirical formula                           | C <sub>24</sub> H <sub>22</sub> F <sub>4</sub> N <sub>2</sub> O <sub>4</sub> |
| Formula weight                              | 478.43                                                                       |
| Temperature/K                               | 120.00                                                                       |
| Crystal system                              | monoclinic                                                                   |
| Space group                                 | P2 <sub>1</sub>                                                              |
| a/Å                                         | 10.3202(11)                                                                  |
| b/Å                                         | 13.7561(14)                                                                  |
| c/Å                                         | 15.4577(16)                                                                  |
| α/°                                         | 90                                                                           |
| β/°                                         | 98.611(4)                                                                    |
| γ/°                                         | 90                                                                           |
| Volume/Å <sup>3</sup>                       | 2169.7(4)                                                                    |
| Z                                           | 4                                                                            |
| ρ <sub>calc</sub> /cm <sup>3</sup>          | 1.465                                                                        |
| μ/mm <sup>-1</sup>                          | 0.123                                                                        |
| F(000)                                      | 992.0                                                                        |
| Crystal size/mm <sup>3</sup>                | 0.16 × 0.14 × 0.08                                                           |
| Radiation                                   | MoKα (λ = 0.71073)                                                           |
| 2θ range for data collection/°              | 3.992 to 59.99                                                               |
| Index ranges                                | -14 ≤ h ≤ 14, -19 ≤ k ≤ 19, -21 ≤ l ≤ 21                                     |
| Reflections collected                       | 37925                                                                        |
| Independent reflections                     | 12590 [R <sub>int</sub> = 0.0866, R <sub>sigma</sub> = 0.1236]               |
| Data/restraints/parameters                  | 12590/1/619                                                                  |
| Goodness-of-fit on F <sup>2</sup>           | 1.050                                                                        |
| Final R indexes [I ≥ 2σ (I)]                | R <sub>1</sub> = 0.0765, wR <sub>2</sub> = 0.1347                            |
| Final R indexes [all data]                  | R <sub>1</sub> = 0.1282, wR <sub>2</sub> = 0.1566                            |
| Largest diff. peak/hole / e Å <sup>-3</sup> | 0.31/-0.34                                                                   |
| Flack parameter                             | 0.2(5)                                                                       |
| CCDC Number                                 | 2392122                                                                      |

Crystal structure: 40

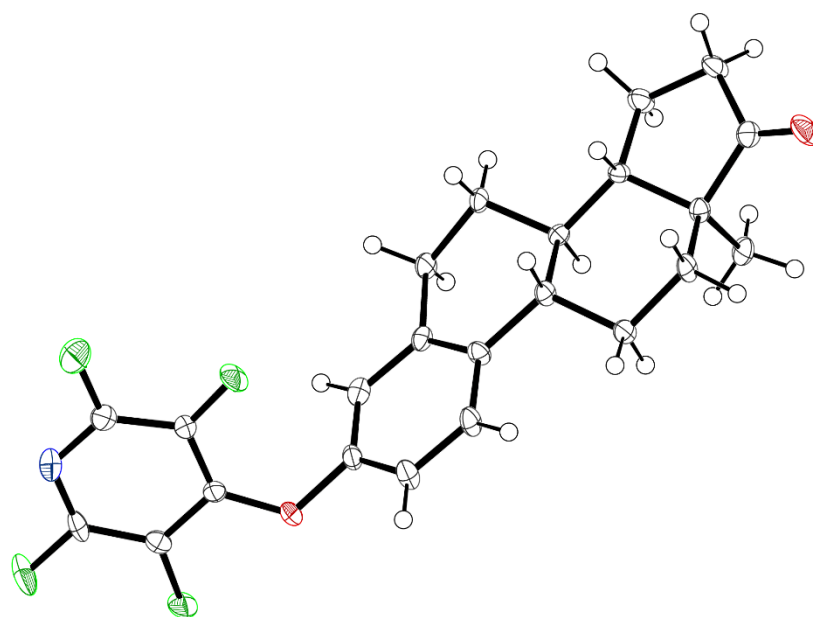

|                                             |                                                                |
|---------------------------------------------|----------------------------------------------------------------|
| Empirical formula                           | C <sub>23</sub> H <sub>21</sub> F <sub>4</sub> NO <sub>2</sub> |
| Formula weight                              | 419.41                                                         |
| Temperature/K                               | 296.15                                                         |
| Crystal system                              | monoclinic                                                     |
| Space group                                 | P2 <sub>1</sub>                                                |
| a/Å                                         | 7.1096(6)                                                      |
| b/Å                                         | 7.9622(7)                                                      |
| c/Å                                         | 17.1109(16)                                                    |
| α/°                                         | 90                                                             |
| β/°                                         | 98.347(3)                                                      |
| γ/°                                         | 90                                                             |
| Volume/Å <sup>3</sup>                       | 958.35(15)                                                     |
| Z                                           | 2                                                              |
| ρ <sub>calc</sub> /cm <sup>3</sup>          | 1.453                                                          |
| μ/mm <sup>-1</sup>                          | 0.119                                                          |
| F(000)                                      | 436.0                                                          |
| Crystal size/mm <sup>3</sup>                | 0.32 × 0.27 × 0.24                                             |
| Radiation                                   | MoKα (λ = 0.71073)                                             |
| 2θ range for data collection/°              | 4.812 to 60                                                    |
| Index ranges                                | -10 ≤ h ≤ 9, -11 ≤ k ≤ 11, 0 ≤ l ≤ 24                          |
| Reflections collected                       | 5482                                                           |
| Independent reflections                     | 5482 [R <sub>int</sub> = ?, R <sub>sigma</sub> = 0.0454]       |
| Data/restraints/parameters                  | 5482/1/273                                                     |
| Goodness-of-fit on F <sup>2</sup>           | 1.114                                                          |
| Final R indexes [I ≥ 2σ (I)]                | R <sub>1</sub> = 0.0633, wR <sub>2</sub> = 0.1578              |
| Final R indexes [all data]                  | R <sub>1</sub> = 0.0653, wR <sub>2</sub> = 0.1590              |
| Largest diff. peak/hole / e Å <sup>-3</sup> | 0.44/-0.34                                                     |
| Flack parameter                             | 0.0(3)                                                         |
| CCDC Number                                 | 2392123                                                        |

Crystal structure: 41

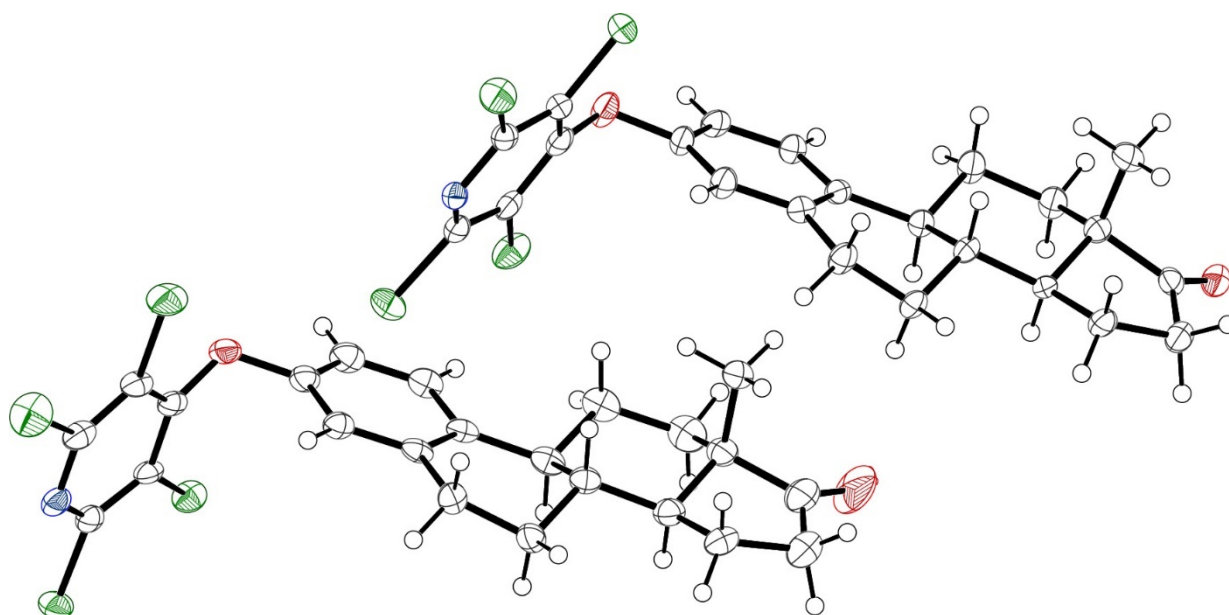

|                                             |                                                                               |
|---------------------------------------------|-------------------------------------------------------------------------------|
| Empirical formula                           | C <sub>48</sub> H <sub>46</sub> Cl <sub>8</sub> N <sub>2</sub> O <sub>5</sub> |
| Formula weight                              | 1014.531                                                                      |
| Temperature/K                               | 120.00                                                                        |
| Crystal system                              | orthorhombic                                                                  |
| Space group                                 | P2 <sub>1</sub> 2 <sub>1</sub> 2 <sub>1</sub>                                 |
| a/Å                                         | 7.8593(3)                                                                     |
| b/Å                                         | 12.9213(4)                                                                    |
| c/Å                                         | 44.5444(15)                                                                   |
| α/°                                         | 90                                                                            |
| β/°                                         | 90                                                                            |
| γ/°                                         | 90                                                                            |
| Volume/Å <sup>3</sup>                       | 4523.6(3)                                                                     |
| Z                                           | 4                                                                             |
| ρ <sub>calc</sub> /cm <sup>3</sup>          | 1.490                                                                         |
| μ/mm <sup>-1</sup>                          | 0.549                                                                         |
| F(000)                                      | 2101.7                                                                        |
| Crystal size/mm <sup>3</sup>                | 0.121 × 0.096 × 0.065                                                         |
| Radiation                                   | MoKα (λ = 0.71073)                                                            |
| 2θ range for data collection/°              | 3.64 to 55                                                                    |
| Index ranges                                | -11 ≤ h ≤ 11, -18 ≤ k ≤ 19, -65 ≤ l ≤ 65                                      |
| Reflections collected                       | 86112                                                                         |
| Independent reflections                     | 10394 [R <sub>int</sub> = 0.1243, R <sub>sigma</sub> = 0.1311]                |
| Data/restraints/parameters                  | 10394/522/543                                                                 |
| Goodness-of-fit on F <sup>2</sup>           | 1.062                                                                         |
| Final R indexes [I ≥ 2σ (I)]                | R <sub>1</sub> = 0.0635, wR <sub>2</sub> = 0.1067                             |
| Final R indexes [all data]                  | R <sub>1</sub> = 0.0965, wR <sub>2</sub> = 0.1197                             |
| Largest diff. peak/hole / e Å <sup>-3</sup> | 0.61/-0.60                                                                    |
| Flack parameter                             | 0.01(3)                                                                       |
| CCDC Number                                 | 2392124                                                                       |

Crystal structure: 42

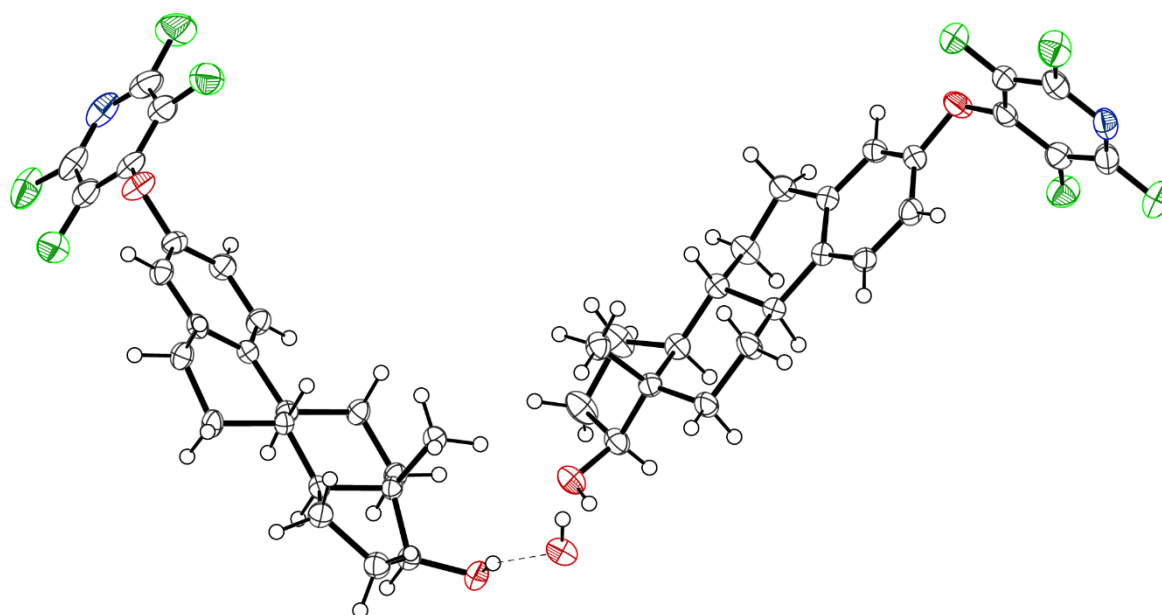

|                                             |                                                                               |
|---------------------------------------------|-------------------------------------------------------------------------------|
| Empirical formula                           | C <sub>92</sub> H <sub>94</sub> F <sub>16</sub> N <sub>4</sub> O <sub>9</sub> |
| Formula weight                              | 1703.71                                                                       |
| Temperature/K                               | 120.00                                                                        |
| Crystal system                              | monoclinic                                                                    |
| Space group                                 | C2                                                                            |
| a/Å                                         | 34.3327(13)                                                                   |
| b/Å                                         | 6.6021(3)                                                                     |
| c/Å                                         | 23.8537(9)                                                                    |
| α/°                                         | 90                                                                            |
| β/°                                         | 132.8876(16)                                                                  |
| γ/°                                         | 90                                                                            |
| Volume/Å <sup>3</sup>                       | 3961.6(3)                                                                     |
| Z                                           | 2                                                                             |
| ρ <sub>calc</sub> /cm <sup>3</sup>          | 1.428                                                                         |
| μ/mm <sup>-1</sup>                          | 0.996                                                                         |
| F(000)                                      | 1780.0                                                                        |
| Crystal size/mm <sup>3</sup>                | 0.36 × 0.08 × 0.01                                                            |
| Radiation                                   | Mo Kα (λ = 1.54178)                                                           |
| 2θ range for data collection/°              | 5.056 to 144.898                                                              |
| Index ranges                                | -42 ≤ h ≤ 42, -7 ≤ k ≤ 8, -29 ≤ l ≤ 29                                        |
| Reflections collected                       | 24165                                                                         |
| Independent reflections                     | 7239 [R <sub>int</sub> = 0.0573, R <sub>sigma</sub> = 0.0579]                 |
| Data/restraints/parameters                  | 7239/1/734                                                                    |
| Goodness-of-fit on F <sup>2</sup>           | 1.027                                                                         |
| Final R indexes [I ≥ 2σ (I)]                | R <sub>1</sub> = 0.0477, wR <sub>2</sub> = 0.1153                             |
| Final R indexes [all data]                  | R <sub>1</sub> = 0.0579, wR <sub>2</sub> = 0.1217                             |
| Largest diff. peak/hole / e Å <sup>-3</sup> | 0.25/-0.25                                                                    |
| Flack parameter                             | -0.14(16)                                                                     |
| CCDC Number                                 | 2392125                                                                       |
| Notes                                       | <i>Asymmetric unit exists as a half hydrate.</i>                              |

Crystal structure: 43

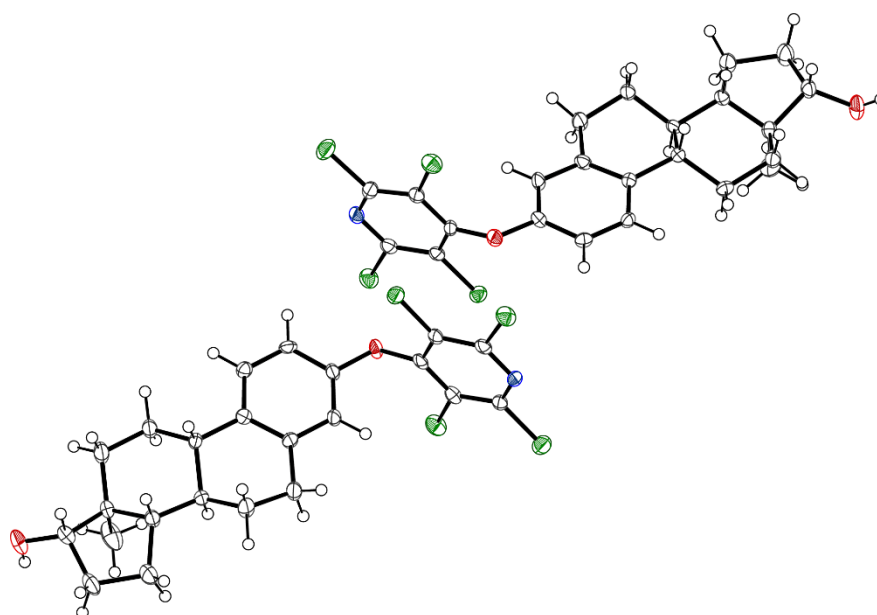

|                                             |                                                                 |
|---------------------------------------------|-----------------------------------------------------------------|
| Empirical formula                           | C <sub>23</sub> H <sub>23</sub> Cl <sub>4</sub> NO <sub>2</sub> |
| Formula weight                              | 487.22                                                          |
| Temperature/K                               | 120.00                                                          |
| Crystal system                              | monoclinic                                                      |
| Space group                                 | P2 <sub>1</sub>                                                 |
| a/Å                                         | 8.8203(3)                                                       |
| b/Å                                         | 8.1152(2)                                                       |
| c/Å                                         | 30.0843(10)                                                     |
| α/°                                         | 90                                                              |
| β/°                                         | 91.5990(10)                                                     |
| γ/°                                         | 90                                                              |
| Volume/Å <sup>3</sup>                       | 2152.55(12)                                                     |
| Z                                           | 4                                                               |
| ρ <sub>calc</sub> /cm <sup>3</sup>          | 1.503                                                           |
| μ/mm <sup>-1</sup>                          | 0.571                                                           |
| F(000)                                      | 1008.0                                                          |
| Crystal size/mm <sup>3</sup>                | 0.182 × 0.089 × 0.028                                           |
| Radiation                                   | Mo Kα (λ = 0.71073)                                             |
| 2θ range for data collection/°              | 4.064 to 61.092                                                 |
| Index ranges                                | -12 ≤ h ≤ 12, -11 ≤ k ≤ 11, -42 ≤ l ≤ 42                        |
| Reflections collected                       | 65705                                                           |
| Independent reflections                     | 12928 [R <sub>int</sub> = 0.0645, R <sub>sigma</sub> = 0.0608]  |
| Data/restraints/parameters                  | 12928/1/551                                                     |
| Goodness-of-fit on F <sup>2</sup>           | 1.101                                                           |
| Final R indexes [I ≥ 2σ (I)]                | R <sub>1</sub> = 0.0591, wR <sub>2</sub> = 0.0973               |
| Final R indexes [all data]                  | R <sub>1</sub> = 0.0770, wR <sub>2</sub> = 0.1027               |
| Largest diff. peak/hole / e Å <sup>-3</sup> | 0.41/-0.47                                                      |
| Flack parameter                             | -0.02(2)                                                        |
| CCDC Number                                 | 2392126                                                         |

## Computational details

### Generation of interacting pairs

Each interacting pair of molecules from the crystal structure of a compound with the hydrogens normalized was generated from Mercury<sup>[6]</sup> as a mol2 file and converted to a Gaussian 16 input file in GaussView.<sup>[7]</sup>

### Generation of output files

The Gaussian 16 package<sup>[8]</sup> was used to generate wavefunction files at the computationally-intensive and benchmark-accurate model chemistry MP2<sup>[9]</sup>/6-311G(d,p) for quantum theory of atoms in molecules (QTAIM) and non-covalent interactions-reduced density gradient (NCI-RDG) analyses and natural bond orbital (NBO) output files for NBO analyses.

### Intermolecular interaction energies

The difference between the interacting pair total electronic energy and the sum of the total electronic energies of the two individual molecules was determined as the intermolecular interaction energy of the specific interacting pair (Tables SX). The computed MP2/6-311G(d,p) energies are based on gas-phase environments so favor non-polar pairs over polar pairs resulting in increased interaction energies for non-polar pairs and decreased interaction energies for polar pairs. Dipole moments for single molecules and interacting pairs are thus listed in the tables to aid our interpretation of the intermolecular interaction energy values.

### QTAIM

QTAIM analyses for all pairs of molecules containing intermolecular interactions in the crystal structures were carried out with the wavefunction file .wfn [at MP2/6-311G(d,p)], obtained from Gaussian 16 as input in the AIMALL package<sup>[10]</sup> and selected parameters like Laplacian ( $\nabla^2\rho$ ) and bond dissociation energy (D.Ev) at the bond critical points (BCPs) were calculated.

### NCI-RDG

NCI-RDG analyses for all pairs of molecules were performed using AIMALL with the wavefunction file .wfx [at MP2/6-311G(d,p)] obtained from Gaussian 16 to generate the reduced density gradient (RDG) and  $\rho*\text{sign}(\lambda_2)$  cube files for isosurface figures.

### NBO

NBO analyses were carried out on all pairs of molecules at MP2/6-311G(d,p) using NBO 3.1 by E. D. Glendening, A. E. Reed, J. E. Carpenter, and F. Weinhold<sup>[11]</sup> in Gaussian 16. The orbital donor-acceptor intermolecular interactions within pairs are assessed by second-order perturbation theory where the stabilization energies  $E(2)$  of delocalizations from the filled NBOs to the unoccupied/unfilled non-Lewis NBOs are estimated.

**Table S3.** Total electronic energies, intermolecular interaction energies and dipole moments of individual molecules and interacting pairs for tetrafluoropyridyl ethers **1**, **5–9**. Two independent molecules in a crystal structure are denoted as molecules A and B here.

| Molecule/Pair | Total Energy<br>a.u. | Intermolecular Interaction Energy<br>kJ mol <sup>-1</sup> | Dipole moment<br>Debye |
|---------------|----------------------|-----------------------------------------------------------|------------------------|
| <b>1</b>      |                      |                                                           |                        |
| Molecule      | -988.53838           |                                                           | 4.13                   |
| Pair 1        | -1977.09565          | 49.58                                                     | 7.81                   |
| Pair 2        | -1977.08986          | 34.39                                                     | 3.99                   |
| Pair 3        | -1977.08708          | 27.10                                                     | 5.14                   |
| Pair 4        | -1977.07907          | 6.06                                                      | 7.09                   |
| <b>5</b>      |                      |                                                           |                        |
| Molecule      | -1063.59041          |                                                           | 3.71                   |
| Pair 1        | -2127.20025          | 51.01                                                     | 7.10                   |
| Pair 2        | -2127.19679          | 41.92                                                     | 5.42                   |
| Pair 3        | -2127.19434          | 35.48                                                     | 0.41                   |
| Pair 4        | -2127.19213          | 29.68                                                     | 6.53                   |
| Pair 5        | -2127.18377          | 7.73                                                      | 5.10                   |
| <b>6</b>      |                      |                                                           |                        |
| Molecule      | -949.33973           |                                                           | 3.83                   |
| Pair 1        | -1898.69519          | 41.30                                                     | 7.25                   |
| Pair 2        | -1898.69440          | 39.22                                                     | 2.86                   |
| Pair 3        | -1898.68831          | 23.24                                                     | 3.96                   |
| Pair 4        | -1898.68798          | 22.37                                                     | 3.06                   |
| Pair 5        | -1898.68286          | 8.91                                                      | 6.69                   |
| <b>7</b>      |                      |                                                           |                        |
| Molecule      | -3521.24224          |                                                           | 1.96                   |
| Pair 1        | -7042.49904          | 38.24                                                     | 3.59                   |
| Pair 2        | -7042.49595          | 30.14                                                     | 0.83                   |
| Pair 3        | -7042.49571          | 29.50                                                     | 0.00                   |
| Pair 4        | -7042.49395          | 24.88                                                     | 0.80                   |
| Pair 5        | -7042.48860          | 10.84                                                     | 0.00                   |
| Pair 6        | -7042.48788          | 8.94                                                      | 4.60                   |
| <b>8</b>      |                      |                                                           |                        |
| Molecule      | -1408.39484          |                                                           | 1.88                   |
| Pair 1        | -2816.80381          | 37.10                                                     | 3.40                   |
| Pair 2        | -2816.80100          | 29.71                                                     | 0.87                   |
| Pair 3        | -2816.80034          | 27.98                                                     | 0.00                   |
| Pair 4        | -2816.79930          | 25.24                                                     | 0.87                   |
| Pair 5        | -2816.79345          | 9.87                                                      | 0.00                   |
| Pair 6        | -2816.79242          | 7.17                                                      | 4.20                   |
| <b>9</b>      |                      |                                                           |                        |
| Molecule A    | -1153.42816          |                                                           | 2.75                   |
| Molecule B    | -1153.42622          |                                                           | 2.68                   |
| Pair 1        | -2306.87477          | 53.54                                                     | 5.24                   |
| Pair 2        | -2306.87243          | 42.32                                                     | 0.00                   |
| Pair 3        | -2306.86480          | 32.45                                                     | 2.82                   |
| Pair 4        | -2306.86589          | 30.22                                                     | 5.45                   |
| Pair 5        | -2306.86525          | 28.56                                                     | 2.55                   |
| Pair 6        | -2306.86374          | 24.60                                                     | 5.16                   |
| Pair 7        | -2306.85926          | 17.89                                                     | 5.12                   |

**Table S4.** Total electronic energies, intermolecular interaction energies and dipole moments of individual molecules and interacting pairs for tetrafluoropyridyl thioethers **2**, **10–14**. Crystal structures that contain two independent molecules are listed as molecules A and B here.

| Molecule/Pair | Total Energy<br>a.u. | Intermolecular Interaction Energy<br>kJ mol <sup>-1</sup> | Dipole moment<br>Debye |
|---------------|----------------------|-----------------------------------------------------------|------------------------|
| <b>2</b>      |                      |                                                           |                        |
| Molecule A    | -1311.14878          |                                                           | 4.38                   |
| Molecule B    | -1311.14719          |                                                           | 4.17                   |
| Pair 1        | -2622.31845          | 54.88                                                     | 8.38                   |
| Pair 2        | -2622.31457          | 53.01                                                     | 7.98                   |
| Pair 3        | -2622.30930          | 30.85                                                     | 0.77                   |
| Pair 4        | -2622.30877          | 29.45                                                     | 0.96                   |
| Pair 5        | -2622.30571          | 25.59                                                     | 5.44                   |
| Pair 6        | -2622.30141          | 18.46                                                     | 0.88                   |
| <b>10</b>     |                      |                                                           |                        |
| Molecule      | -1386.20129          |                                                           | 4.79                   |
| Pair 1        | -2772.42285          | 53.22                                                     | 8.98                   |
| Pair 2        | -2772.41697          | 37.76                                                     | 6.60                   |
| Pair 3        | -2772.41581          | 34.74                                                     | 0.79                   |
| Pair 4        | -2772.41210          | 24.99                                                     | 7.52                   |
| Pair 5        | -2772.40355          | 2.54                                                      | 0.36                   |
| <b>11</b>     |                      |                                                           |                        |
| Molecule A    | -1271.94940          |                                                           | 3.92                   |
| Molecule B    | -1271.94934          |                                                           | 3.97                   |
| Pair 1        | -2543.91617          | 45.63                                                     | 7.57                   |
| Pair 2        | -2543.91603          | 45.58                                                     | 7.64                   |
| Pair 3        | -2543.91038          | 30.74                                                     | 0.60                   |
| Pair 4        | -2543.90947          | 28.04                                                     | 0.58                   |
| Pair 5        | -2543.90488          | 16.14                                                     | 4.49                   |
| <b>12</b>     |                      |                                                           |                        |
| Molecule      | -3843.85339          |                                                           | 2.68                   |
| Pair 1        | -7687.72953          | 59.71                                                     | 0.00                   |
| Pair 2        | -7687.72408          | 45.41                                                     | 0.00                   |
| Pair 3        | -7687.72159          | 38.88                                                     | 4.96                   |
| Pair 4        | -7687.71724          | 27.44                                                     | 1.93                   |
| Pair 5        | -7687.71438          | 19.93                                                     | 0.00                   |
| Pair 6        | -7687.71135          | 11.98                                                     | 5.18                   |
| Pair 7        | -7687.70881          | 5.32                                                      | 0.00                   |
| <b>13</b>     |                      |                                                           |                        |
| Molecule      | -1731.00622          |                                                           | 2.35                   |
| Pair 1        | -3462.02594          | 35.45                                                     | 3.96                   |
| Pair 2        | -3462.02536          | 33.95                                                     | 2.86                   |
| Pair 3        | -3462.02457          | 31.86                                                     | 2.18                   |
| Pair 4        | -3462.01843          | 15.75                                                     | 4.80                   |
| Pair 5        | -3462.01342          | 2.59                                                      | 1.01                   |
| <b>14</b>     |                      |                                                           |                        |
| Molecule      | -1476.03843          |                                                           | 3.86                   |
| Pair 1        | -2952.09506          | 47.81                                                     | 7.61                   |
| Pair 2        | -2952.08900          | 31.90                                                     | 7.28                   |
| Pair 3        | -2952.08675          | 25.99                                                     | 6.76                   |
| Pair 4        | -2952.08612          | 24.33                                                     | 8.25                   |
| Pair 5        | -2952.08482          | 20.92                                                     | 8.79                   |
| Pair 6        | -2952.08361          | 17.76                                                     | 7.33                   |

**Table S5.** Total electronic energies, intermolecular interaction energies and dipole moments of individual molecules and interacting pairs for tetrachloropyridyl ethers **3**, **16–17**, **18–19**. Crystal structures that contain two independent molecules are listed as molecules A and B here.

| Molecule/Pair | Total Energy<br>a.u. | Intermolecular Interaction Energy<br>kJ mol <sup>-1</sup> | Dipole moment<br>Debye |
|---------------|----------------------|-----------------------------------------------------------|------------------------|
| <b>3</b>      |                      |                                                           |                        |
| Molecule      | -2428.47997          |                                                           | 3.84                   |
| Pair 1        | -4856.99152          | 82.92                                                     | 0.00                   |
| Pair 2        | -4856.97292          | 34.09                                                     | 0.00                   |
| Pair 3        | -4856.96990          | 26.17                                                     | 0.00                   |
| Pair 4        | -4856.96980          | 25.90                                                     | 0.00                   |
| Pair 5        | -4856.96496          | 13.19                                                     | 7.46                   |
| Pair 6        | -4856.96171          | 4.65                                                      | 0.00                   |
| <b>16</b>     |                      |                                                           |                        |
| Molecule A    | -2848.33727          |                                                           | 1.53                   |
| Molecule B    | -2848.33687          |                                                           | 1.49                   |
| Pair 1        | -5696.70871          | 91.80                                                     | 0.00                   |
| Pair 2        | -5696.70627          | 85.38                                                     | 0.00                   |
| Pair 3        | -5696.69290          | 50.28                                                     | 0.00                   |
| Pair 4        | -5696.69259          | 49.47                                                     | 0.00                   |
| Pair 5        | -5696.68972          | 40.90                                                     | 0.22                   |
| Pair 6        | -5696.68162          | 20.67                                                     | 2.87                   |
| Pair 7        | -5696.67847          | 12.40                                                     | 2.94                   |
| Pair 8        | -5696.67545          | 3.43                                                      | 0.38                   |
| <b>17</b>     |                      |                                                           |                        |
| Molecule A    | -4961.18126          |                                                           | 1.86                   |
| Molecule B    | -4961.17969          |                                                           | 1.68                   |
| Pair 1        | -9922.39692          | 90.34                                                     | 0.00                   |
| Pair 2        | -9922.39275          | 87.60                                                     | 0.00                   |
| Pair 3        | -9922.37804          | 48.97                                                     | 0.00                   |
| Pair 4        | -9922.38078          | 47.95                                                     | 0.00                   |
| Pair 5        | -9922.37260          | 30.59                                                     | 0.80                   |
| Pair 6        | -9922.36951          | 18.37                                                     | 3.51                   |
| Pair 7        | -9922.36237          | 7.85                                                      | 3.27                   |
| Pair 8        | -9922.36523          | 7.12                                                      | 3.63                   |
| <b>18</b>     |                      |                                                           |                        |
| Molecule A    | -2593.37326          |                                                           | 3.10                   |
| Molecule B    | -2593.37124          |                                                           | 2.95                   |
| Pair 1        | -5186.78052          | 89.27                                                     | 0.00                   |
| Pair 2        | -5186.77535          | 86.34                                                     | 0.00                   |
| Pair 3        | -5186.76753          | 55.17                                                     | 0.00                   |
| Pair 4        | -5186.75747          | 34.05                                                     | 4.96                   |
| Pair 5        | -5186.75482          | 32.43                                                     | 0.00                   |
| Pair 6        | -5186.75693          | 27.33                                                     | 0.00                   |
| Pair 7        | -5186.74693          | 11.71                                                     | 5.71                   |
| <b>19</b>     |                      |                                                           |                        |
| Molecule      | -2503.53258          |                                                           | 4.44                   |
| Pair 1        | -5007.09711          | 83.91                                                     | 0.00                   |
| Pair 2        | -5007.08363          | 48.52                                                     | 0.00                   |
| Pair 3        | -5007.07628          | 29.23                                                     | 0.00                   |

|        |             |       |      |
|--------|-------------|-------|------|
| Pair 4 | -5007.07400 | 23.22 | 6.83 |
| Pair 5 | -5007.07385 | 22.85 | 8.58 |
| Pair 6 | -5007.06960 | 11.69 | 0.00 |

**Table S6.** Total electronic energies, intermolecular interaction energies and dipole moments of individual molecules and interacting pairs for tetrachloropyridyl thioethers **4**, **20–22**. Crystal structures that contain two independent molecules are listed as molecules A and B here.

| Molecule/Pair | Total Energy<br>a.u. | Intermolecular Interaction Energy<br>kJ mol <sup>-1</sup> | Dipole moment<br>Debye |
|---------------|----------------------|-----------------------------------------------------------|------------------------|
| <b>4</b>      |                      |                                                           |                        |
| Molecule      | -2751.08427          |                                                           | 4.32                   |
| Pair 1        | -5502.19844          | 78.51                                                     | 0.00                   |
| Pair 2        | -5502.18489          | 42.94                                                     | 0.00                   |
| Pair 3        | -5502.17836          | 25.78                                                     | 0.00                   |
| Pair 4        | -5502.17541          | 18.04                                                     | 0.00                   |
| Pair 5        | -5502.17307          | 11.89                                                     | 8.37                   |
| Pair 6        | -5502.17149          | 7.73                                                      | 8.39                   |
| Pair 7        | -5502.17048          | 5.10                                                      | 9.00                   |
| <b>20</b>     |                      |                                                           |                        |
| Molecule A    | -3170.94192          |                                                           | 1.53                   |
| Molecule B    | -3170.94166          |                                                           | 1.49                   |
| Pair 1        | -6341.91705          | 87.22                                                     | 0.00                   |
| Pair 2        | -6341.91468          | 82.36                                                     | 0.00                   |
| Pair 3        | -6341.89661          | 33.54                                                     | 0.71                   |
| Pair 4        | -6341.89530          | 30.11                                                     | 4.10                   |
| Pair 5        | -6341.88600          | 5.68                                                      | 4.33                   |
| Pair 6        | -6341.88536          | 4.01                                                      | 4.22                   |
| Pair 7        | -6341.88524          | 3.70                                                      | 0.27                   |
| <b>21</b>     |                      |                                                           |                        |
| Molecule A    | -5283.78905          |                                                           | 2.15                   |
| Molecule B    | -5283.78872          |                                                           | 1.68                   |
| Pair 1        | -10567.61104         | 86.49                                                     | 0.00                   |
| Pair 2        | -10567.60165         | 63.58                                                     | 0.66                   |
| Pair 3        | -10567.60154         | 61.53                                                     | 0.00                   |
| Pair 4        | -10567.59125         | 35.39                                                     | 0.79                   |
| Pair 5        | -10567.58952         | 30.86                                                     | 0.46                   |
| Pair 6        | -10567.58521         | 20.43                                                     | 4.18                   |
| Pair 7        | -10567.58066         | 8.47                                                      | 4.19                   |
| Pair 8        | -10567.58081         | 8.00                                                      | 0.70                   |
| Pair 9        | -10567.58098         | 7.57                                                      | 4.10                   |
| Pair 10       | -10567.57937         | 4.22                                                      | 4.18                   |
| <b>22</b>     |                      |                                                           |                        |
| Molecule      | -2826.13395          |                                                           | 4.96                   |
| Pair 1        | -5652.28773          | 52.05                                                     | 5.94                   |
| Pair 2        | -5652.28739          | 51.16                                                     | 9.20                   |
| Pair 3        | -5652.28013          | 32.08                                                     | 6.96                   |
| Pair 4        | -5652.27910          | 29.39                                                     | 1.53                   |

## QTAIM, NCI-RDG and NBO Analyses Interacting pairs in compounds 1-4

Compound 1 pair 1

Total interaction energy = 49.6 kJ mol<sup>-1</sup>

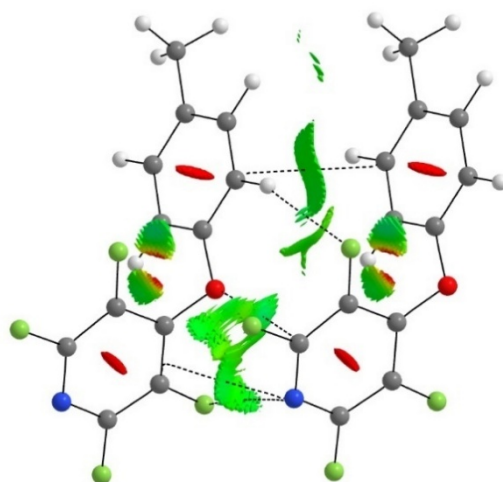

**Figure S117.** Bond critical paths (BCP) as dashed lines and reduced density gradient (RDG) isosurface (isovalue 0.5 mapped on a Blue-Green-Red color scale with values  $-0.02 < \rho^* \text{sign} \lambda_2 < 0.02$  a.u.) in pair.

**Table S7.** Distances, dissociation energies and Laplacian of electron density ( $\nabla^2\rho$ ) of bond critical paths (BCP) identified by QTAIM analysis.

| BCP   | BCP Distance<br>Å | BCP Dissociation Energy<br>kJ mol <sup>-1</sup> | $\nabla^2\rho$<br>e bohr <sup>-3</sup> |
|-------|-------------------|-------------------------------------------------|----------------------------------------|
| O...C | 2.972             | 7.7                                             | 0.0324                                 |
| F...N | 3.290             | 4.0                                             | 0.0183                                 |
| C...N | 3.440             | 3.3                                             | 0.0147                                 |
| H...F | 2.798             | 3.0                                             | 0.0146                                 |
| C...C | 3.499             | 2.9                                             | 0.0142                                 |

**Table S8.** Donor contribution and stabilization energies in Lewis donor-acceptor orbital interactions from NBO analysis. BD = bond, LP = lone pair.

| Donor  | D-A Stabilization Energy<br>kJ mol <sup>-1</sup> |
|--------|--------------------------------------------------|
| BD C-C | 9.5                                              |
| LP O   | 4.1                                              |
| BD N-C | 2.1                                              |
| LP F   | 1.1                                              |
| BD O-C | 0.6                                              |
| BD F-C | 0.5                                              |
| LP N   | 0.3                                              |

Compound **1** pair 2

Total interaction energy = 34.4 kJ mol<sup>-1</sup>

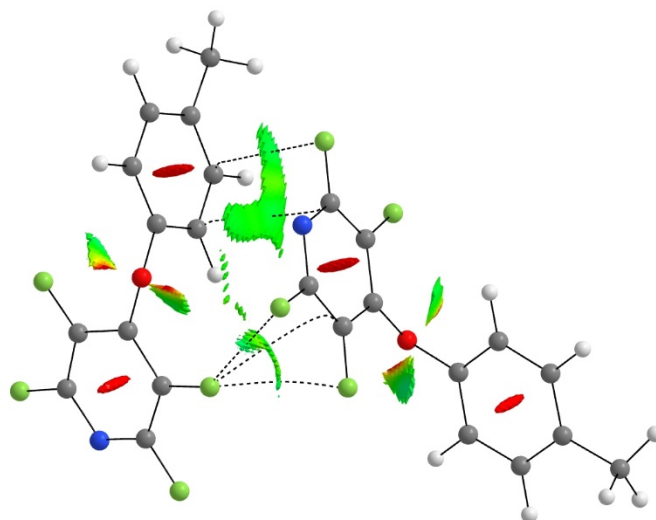

**Figure S118.** Bond critical paths (BCP) as dashed lines and reduced density gradient (RDG) isosurface (isovalue 0.5 mapped on a B-G-R color scale with values  $-0.02 < \rho^* \text{sign} \lambda_2 < 0.02$  a.u.) in pair.

**Table S9.** Distances, dissociation energies and Laplacian of electron density ( $\nabla^2\rho$ ) of bond critical paths (BCP) identified by QTAIM analysis.

| BCP   | BCP Distance<br>Å | BCP Dissociation Energy<br>kJ mol <sup>-1</sup> | $\nabla^2\rho$<br>e bohr <sup>-3</sup> |
|-------|-------------------|-------------------------------------------------|----------------------------------------|
| F...F | 2.940             | 6.9                                             | 0.0298                                 |
| F...F | 2.939             | 6.9                                             | 0.0299                                 |
| F...C | 3.096             | 5.4                                             | 0.0261                                 |
| F...C | 3.394             | 4.5                                             | 0.0197                                 |
| C...C | 3.489             | 3.7                                             | 0.0175                                 |

**Table S10.** Donor contribution and stabilization energies in Lewis donor-acceptor orbital interactions from NBO analysis. BD = bond, LP = lone pair.

| Donor  | D-A Stabilization Energy<br>kJ mol <sup>-1</sup> |
|--------|--------------------------------------------------|
| BD C-C | 8.0                                              |
| LP F   | 3.3                                              |
| BD N-C | 1.7                                              |
| BD F-C | 0.4                                              |

Compound **1** pair 3

Total interaction energy = 27.1 kJ mol<sup>-1</sup>

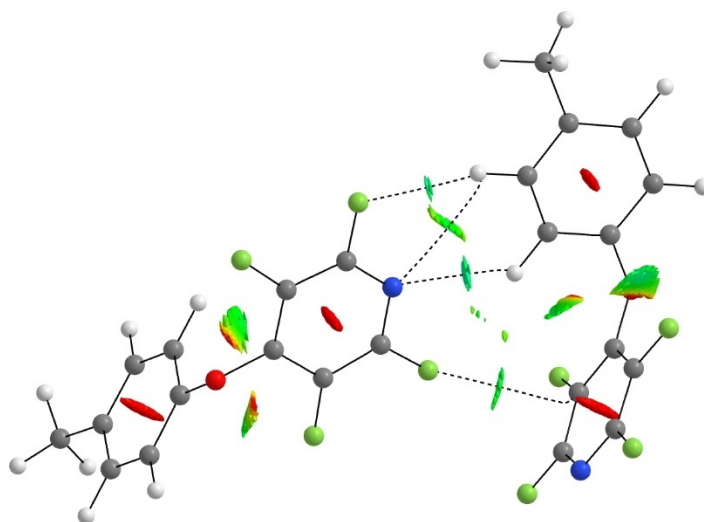

**Figure S119.** Bond critical paths (BCP) as dashed lines and reduced density gradient (RDG) isosurface (isovalue 0.5 mapped on a B-G-R color scale with values  $-0.02 < \rho \cdot \text{sign} \lambda_2 < 0.02$  a.u.) in pair.

**Table S11.** Distances, dissociation energies and Laplacian of electron density ( $\nabla^2\rho$ ) of bond critical paths (BCP) identified by QTAIM analysis.

| BCP   | BCP Distance<br>Å | BCP Dissociation Energy<br>kJ mol <sup>-1</sup> | $\nabla^2\rho$<br>e bohr <sup>-3</sup> |
|-------|-------------------|-------------------------------------------------|----------------------------------------|
| N...H | 2.560             | 6.9                                             | 0.0301                                 |
| H...F | 2.583             | 5.2                                             | 0.0218                                 |
| F...C | 3.171             | 4.4                                             | 0.0208                                 |
| N...H | 3.018             | 3.2                                             | 0.0153                                 |

**Table S12.** Donor contribution and stabilization energies in Lewis donor-acceptor orbital interactions from NBO analysis. BD = bond, LP = lone pair.

| Donor  | D-A Stabilization Energy<br>kJ mol <sup>-1</sup> |
|--------|--------------------------------------------------|
| LP N   | 3.8                                              |
| LP F   | 3.6                                              |
| BD C-H | 0.9                                              |
| BD N-C | 0.8                                              |
| BD C-C | 0.6                                              |
| BD F-C | 0.3                                              |

Compound **1** pair 4

Total interaction energy = 6.1 kJ mol<sup>-1</sup>

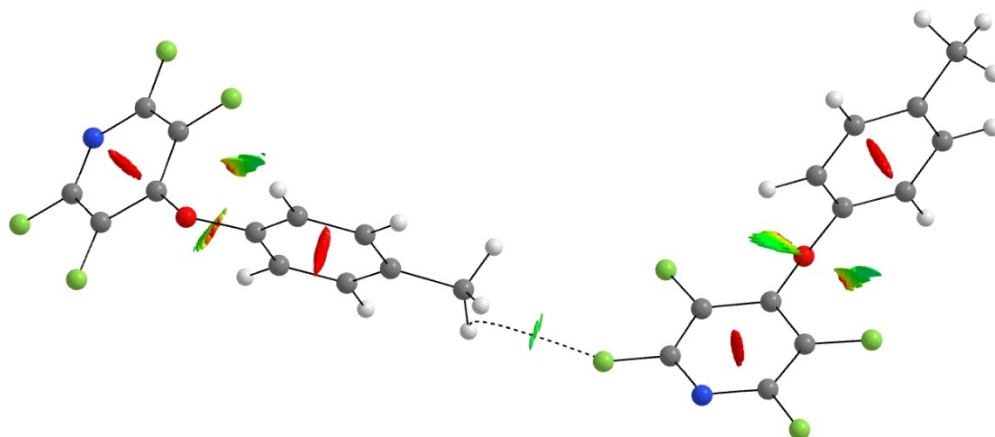

**Figure S120.** Bond critical paths (BCP) as dashed lines and reduced density gradient (RDG) isosurface (isovalue 0.5 mapped on a B-G-R color scale with values  $-0.02 < \rho^* \text{sign} \lambda_2 < 0.02$  a.u.) in pair.

**Table S13.** Distances, dissociation energies and Laplacian of electron density ( $\nabla^2\rho$ ) of bond critical paths (BCP) identified by QTAIM analysis.

| BCP   | BCP Distance<br>Å | BCP Dissociation Energy<br>kJ mol <sup>-1</sup> | $\nabla^2\rho$<br>e bohr <sup>-3</sup> |
|-------|-------------------|-------------------------------------------------|----------------------------------------|
| H...F | 2.748             | 4.8                                             | 0.0236                                 |

**Table S14.** Donor contribution and stabilization energies in Lewis donor-acceptor orbital interactions from NBO analysis. BD = bond, LP = lone pair.

| Donor  | D-A Stabilization Energy<br>kJ mol <sup>-1</sup> |
|--------|--------------------------------------------------|
| LP F   | 1.3                                              |
| BD C-H | 0.3                                              |

Compound **2** pair 1

Total interaction energy = 54.9 kJ mol<sup>-1</sup>

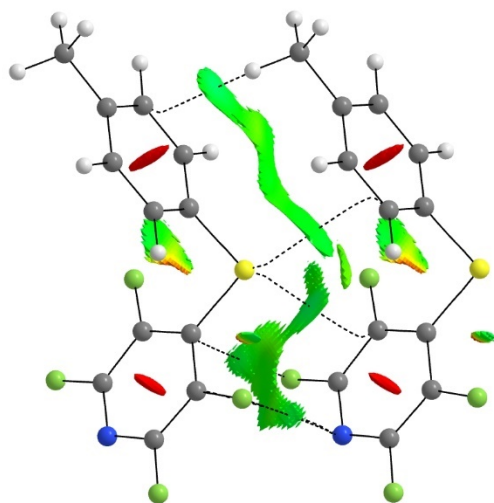

**Figure S121.** Bond critical paths (BCP) as dashed lines and reduced density gradient (RDG) isosurface (isovalue 0.5 mapped on a Blue-Green-Red color scale with values  $-0.02 < \rho^* \text{sign} \lambda_2 < 0.02$  a.u.) in pair.

**Table S15.** Distances, dissociation energies and Laplacian of electron density ( $\nabla^2\rho$ ) of bond critical paths (BCP) identified by QTAIM analysis.

| BCP   | BCP Distance<br>Å | BCP Dissociation Energy<br>kJ mol <sup>-1</sup> | $\nabla^2\rho$<br>e bohr <sup>-3</sup> |
|-------|-------------------|-------------------------------------------------|----------------------------------------|
| C...H | 2.821             | 4.6                                             | 0.0193                                 |
| S...C | 3.482             | 4.4                                             | 0.0208                                 |
| S...C | 3.453             | 4.2                                             | 0.0214                                 |
| F...N | 3.277             | 4.0                                             | 0.0178                                 |
| F...C | 3.300             | 3.8                                             | 0.0178                                 |
| C...N | 3.516             | 2.6                                             | 0.0125                                 |

**Table S16.** Donor contribution and stabilization energies in Lewis donor-acceptor orbital interactions from NBO analysis. 3C = three center bond, BD = bond, LP = lone pair.

| Donor    | D-A Stabilization Energy<br>kJ mol <sup>-1</sup> |
|----------|--------------------------------------------------|
| BD C-C   | 11.7                                             |
| 3C C-C-C | 4.8                                              |
| LP S     | 4.6                                              |
| BD S-C   | 1.9                                              |
| BD C-H   | 0.8                                              |
| 3C C-C-N | 0.7                                              |
| BD F-C   | 0.7                                              |
| BD N-C   | 0.3                                              |
| LP F     | 0.3                                              |

Compound **2** pair 2

Total interaction energy = 53.0 kJ mol<sup>-1</sup>

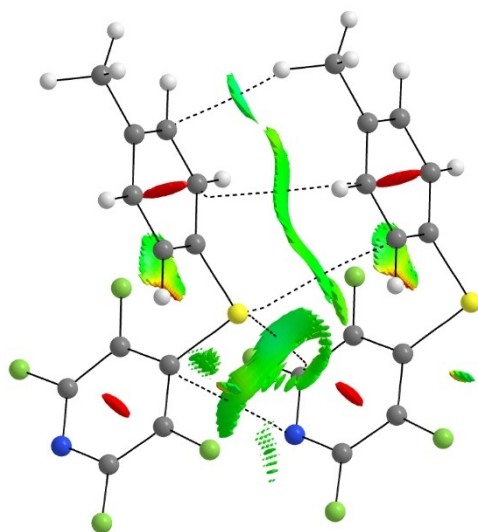

**Figure S122.** Bond critical paths (BCP) as dashed lines and reduced density gradient (RDG) isosurface (isovalue 0.5 mapped on a Blue-Green-Red color scale with values  $-0.02 < \rho^* \text{sign} \lambda_2 < 0.02$  a.u.) in pair.

**Table S17.** Distances, dissociation energies and Laplacian of electron density ( $\nabla^2\rho$ ) of bond critical paths (BCP) identified by QTAIM analysis.

| BCP   | BCP Distance<br>Å | BCP Dissociation Energy<br>kJ mol <sup>-1</sup> | $\nabla^2\rho$<br>e bohr <sup>-3</sup> |
|-------|-------------------|-------------------------------------------------|----------------------------------------|
| S...C | 3.344             | 5.4                                             | 0.0272                                 |
| C...H | 2.665             | 5.2                                             | 0.0220                                 |
| C...N | 3.460             | 3.3                                             | 0.0146                                 |
| S...C | 3.602             | 2.9                                             | 0.0149                                 |
| C...C | 3.581             | 2.6                                             | 0.0118                                 |

**Table S18.** Donor contribution and stabilization energies in Lewis donor-acceptor orbital interactions from NBO analysis. BD = bond, LP = lone pair.

| Donor  | D-A Stabilization Energy<br>kJ mol <sup>-1</sup> |
|--------|--------------------------------------------------|
| BD C-C | 18.8                                             |
| BD C-H | 2.6                                              |
| BD N-C | 2.6                                              |
| BD S-C | 1.9                                              |
| LP S   | 1.6                                              |

Compound **2** pair 3

Total interaction energy = 30.9 kJ mol<sup>-1</sup>

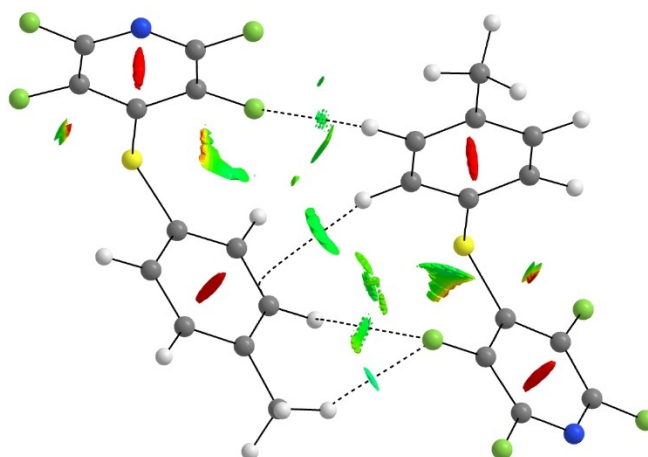

**Figure S123.** Bond critical paths (BCP) as dashed lines and reduced density gradient (RDG) isosurface (isovalue 0.5 mapped on a Blue-Green-Red color scale with values  $-0.02 < \rho^* \text{sign} \lambda_2 < 0.02$  a.u.) in pair.

**Table S19.** Distances, dissociation energies and Laplacian of electron density ( $\nabla^2\rho$ ) of bond critical paths (BCP) identified by QTAIM analysis.

| BCP   | BCP Distance<br>Å | BCP Dissociation Energy<br>kJ mol <sup>-1</sup> | $\nabla^2\rho$<br>e bohr <sup>-3</sup> |
|-------|-------------------|-------------------------------------------------|----------------------------------------|
| F...H | 2.541             | 6.5                                             | 0.0263                                 |
| F...H | 2.807             | 3.6                                             | 0.0177                                 |
| C...H | 2.922             | 3.2                                             | 0.0139                                 |
| F...H | 2.897             | 3.0                                             | 0.0159                                 |

**Table S20.** Donor contribution and stabilization energies in Lewis donor-acceptor orbital interactions from NBO analysis. 3C = three center bond, BD = bond, LP = lone pair.

| Donor    | D-A Stabilization Energy<br>kJ mol <sup>-1</sup> |
|----------|--------------------------------------------------|
| BD C-C   | 2.3                                              |
| 3C C-C-C | 1.2                                              |
| LP F     | 0.9                                              |
| BD C-H   | 0.9                                              |
| LP S     | 0.5                                              |
| BD S-C   | 0.3                                              |

Compound **2** pair 4

Total interaction energy = 29.5 kJ mol<sup>-1</sup>

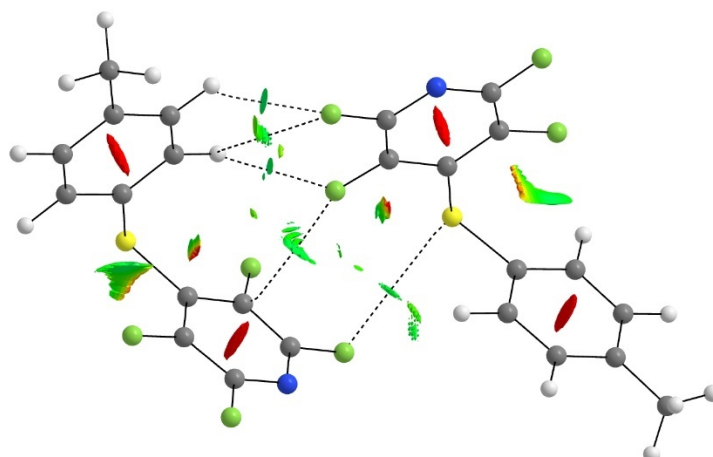

**Figure S124.** Bond critical paths (BCP) as dashed lines and reduced density gradient (RDG) isosurface (isovalue 0.5 mapped on a Blue-Green-Red color scale with values  $-0.02 < \rho^* \text{sign} \lambda_2 < 0.02$  a.u.) in pair.

**Table S21.** Distances, dissociation energies and Laplacian of electron density ( $\nabla^2\rho$ ) of bond critical paths (BCP) identified by QTAIM analysis.

| BCP   | BCP Distance<br>Å | BCP Dissociation Energy<br>kJ mol <sup>-1</sup> | $\nabla^2\rho$<br>e bohr <sup>-3</sup> |
|-------|-------------------|-------------------------------------------------|----------------------------------------|
| F...H | 2.600             | 5.3                                             | 0.0237                                 |
| F...C | 3.103             | 4.8                                             | 0.0221                                 |
| F...H | 2.653             | 4.4                                             | 0.0190                                 |
| F...H | 2.839             | 3.4                                             | 0.0179                                 |
| S...F | 3.607             | 2.8                                             | 0.0156                                 |

**Table S22.** Donor contribution and stabilization energies in Lewis donor-acceptor orbital interactions from NBO analysis. BD = bond, LP = lone pair.

| Donor | D-A Stabilization Energy<br>kJ mol <sup>-1</sup> |
|-------|--------------------------------------------------|
| LP F  | 3.0                                              |
| LP S  | 0.3                                              |

Compound **2** pair 5

Total interaction energy = 25.6 kJ mol<sup>-1</sup>

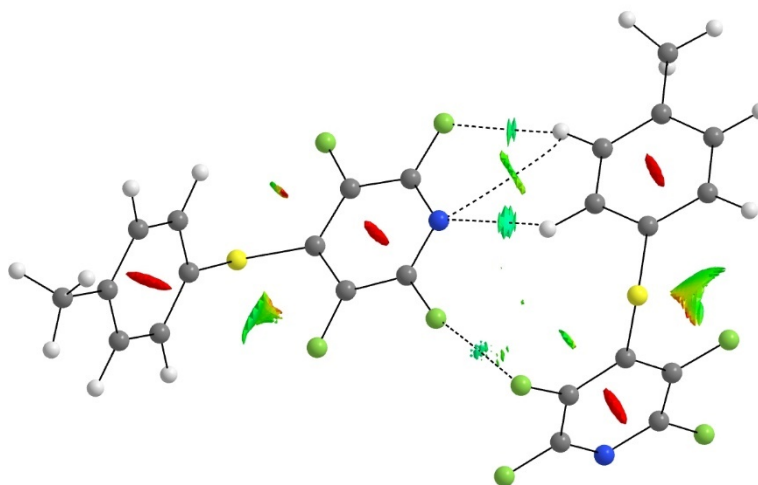

**Figure S125.** Bond critical paths (BCP) as dashed lines and reduced density gradient (RDG) isosurface (isovalue 0.5 mapped on a Blue-Green-Red color scale with values  $-0.02 < \rho^* \text{sign} \lambda_2 < 0.02$  a.u.) in pair.

**Table S23.** Distances, dissociation energies and Laplacian of electron density ( $\nabla^2\rho$ ) of bond critical paths (BCP) identified by QTAIM analysis.

| BCP   | BCP Distance<br>Å | BCP Dissociation Energy<br>kJ mol <sup>-1</sup> | $\nabla^2\rho$<br>e bohr <sup>-3</sup> |
|-------|-------------------|-------------------------------------------------|----------------------------------------|
| F...F | 2.851             | 8.1                                             | 0.0330                                 |
| N...H | 2.640             | 5.8                                             | 0.0253                                 |
| F...H | 2.611             | 4.8                                             | 0.0206                                 |
| N...H | 3.064             | 2.9                                             | 0.0137                                 |

**Table S24.** Donor contribution and stabilization energies in Lewis donor-acceptor orbital interactions from NBO analysis. BD = bond, LP = lone pair.

| Donor  | D-A Stabilization Energy<br>kJ mol <sup>-1</sup> |
|--------|--------------------------------------------------|
| LP F   | 2.9                                              |
| LP N   | 2.6                                              |
| BD C-C | 0.5                                              |
| BD C-H | 0.5                                              |
| BD N-C | 0.4                                              |

Compound **2** pair 6

Total interaction energy = 18.5 kJ mol<sup>-1</sup>

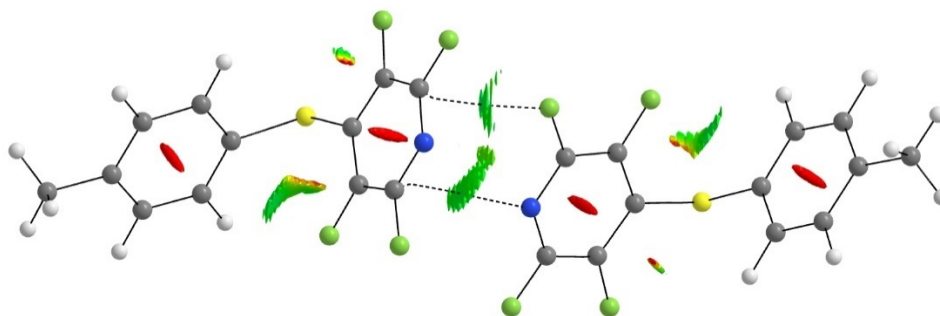

**Figure S126.** Bond critical paths (BCP) as dashed lines and reduced density gradient (RDG) isosurface (isovalue 0.5 mapped on a Blue-Green-Red color scale with values  $-0.02 < \rho \cdot \text{sign} \lambda_2 < 0.02$  a.u.) in pair.

**Table S25.** Distances, dissociation energies and Laplacian of electron density ( $\nabla^2\rho$ ) of bond critical paths (BCP) identified by QTAIM analysis.

| BCP   | BCP Distance<br>Å | BCP Dissociation Energy<br>kJ mol <sup>-1</sup> | $\nabla^2\rho$<br>e bohr <sup>-3</sup> |
|-------|-------------------|-------------------------------------------------|----------------------------------------|
| F...C | 2.982             | 6.5                                             | 0.0294                                 |
| N...C | 3.391             | 3.4                                             | 0.0167                                 |

**Table S26.** Donor contribution and stabilization energies in Lewis donor-acceptor (D-A) orbital interactions from NBO analysis. BD = bond, LP = lone pair.

| Donor  | D-A Stabilization Energy<br>kJ mol <sup>-1</sup> |
|--------|--------------------------------------------------|
| LP F   | 2.8                                              |
| BD N-C | 0.9                                              |
| LP N   | 0.8                                              |
| BD C-C | 0.7                                              |

Compound **3** pair 1

Total interaction energy = 82.9 kJ mol<sup>-1</sup>

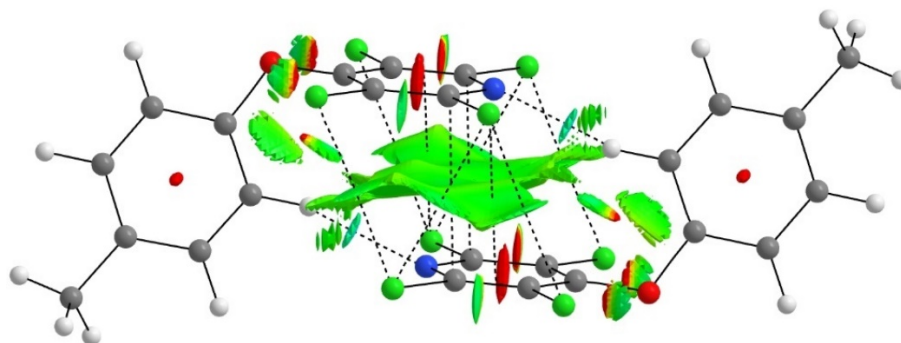

**Figure S127.** Bond critical paths (BCP) as dashed lines and reduced density gradient (RDG) isosurface (isovalue 0.5 mapped on a Blue-Green-Red color scale with values  $-0.02 < \rho^* \text{sign} \lambda_2 < 0.02$  a.u.) in pair.

**Table S27.** Distances, dissociation energies and Laplacian of electron density ( $\nabla^2\rho$ ) of bond critical paths (BCP) identified by QTAIM analysis.

| BCP          | BCP Distance<br>Å | BCP Dissociation Energy<br>kJ mol <sup>-1</sup> | $\nabla^2\rho$<br>e bohr <sup>-3</sup> |
|--------------|-------------------|-------------------------------------------------|----------------------------------------|
| N...H        | 2.416             | 8.6                                             | 0.0378                                 |
| N...H        | 2.416             | 8.6                                             | 0.0378                                 |
| Cl...Cl      | 3.699             | 3.0                                             | 0.0185                                 |
| Cl...Cl      | 3.699             | 3.0                                             | 0.0185                                 |
| Cl...mid C-C | 3.709             | 3.0                                             | 0.0154                                 |
| Cl...mid C-C | 3.709             | 3.0                                             | 0.0154                                 |
| Cl...Cl      | 3.759             | 2.6                                             | 0.0165                                 |
| Cl...Cl      | 3.759             | 2.6                                             | 0.0165                                 |
| Cl...Cl      | 3.796             | 2.4                                             | 0.0151                                 |
| Cl...Cl      | 3.796             | 2.4                                             | 0.0151                                 |

**Table S28.** Donor contribution and stabilization energies in Lewis donor-acceptor (D-A) orbital interactions from NBO analysis. BD = bond, LP = lone pair.

| Donor   | D-A Stabilization Energy<br>kJ mol <sup>-1</sup> |
|---------|--------------------------------------------------|
| LP N    | 18.1                                             |
| BD C-C  | 10.9                                             |
| BD Cl-C | 7.5                                              |
| BD N-C  | 6.7                                              |
| LP Cl   | 2.8                                              |
| BD C-H  | 2.6                                              |

Compound **3** pair 2

Total interaction energy = 34.1 kJ mol<sup>-1</sup>

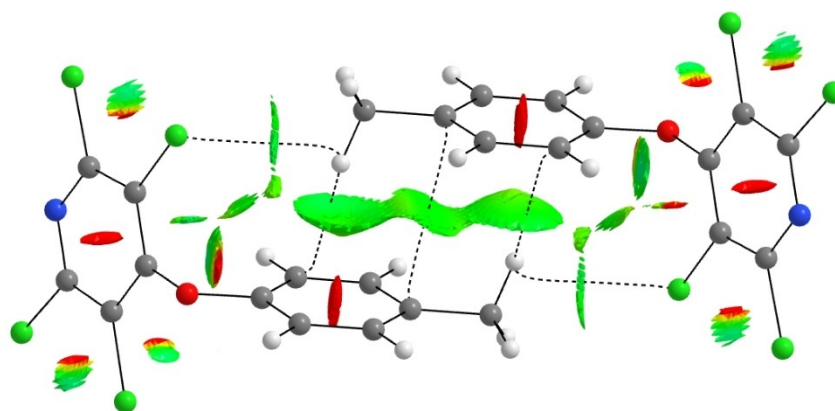

**Figure S128.** Bond critical paths (BCP) as dashed lines and reduced density gradient (RDG) isosurface (isovalue 0.5 mapped on a Blue-Green-Red color scale with values  $-0.02 < \rho \cdot \text{sign} \lambda_2 < 0.02$  a.u.) in pair.

**Table S29.** Distances, dissociation energies and Laplacian of electron density ( $\nabla^2\rho$ ) of bond critical paths (BCP) identified by QTAIM analysis.

| BCP    | BCP Distance<br>Å | BCP Dissociation Energy<br>kJ mol <sup>-1</sup> | $\nabla^2\rho$<br>e bohr <sup>-3</sup> |
|--------|-------------------|-------------------------------------------------|----------------------------------------|
| C...H  | 2.880             | 4.4                                             | 0.0180                                 |
| C...H  | 2.880             | 4.4                                             | 0.0180                                 |
| Cl...H | 3.134             | 3.2                                             | 0.0187                                 |
| Cl...H | 3.134             | 3.2                                             | 0.0187                                 |
| C...C  | 3.733             | 2.4                                             | 0.0102                                 |

**Table S30.** Donor contribution and stabilization energies in Lewis donor-acceptor (D-A) orbital interactions from NBO analysis. BD = bond, LP = lone pair.

| Donor  | D-A Stabilization Energy<br>kJ mol <sup>-1</sup> |
|--------|--------------------------------------------------|
| BD C-C | 13.7                                             |
| LP Cl  | 2.5                                              |
| BD C-H | 0.4                                              |

Compound **3** pair 3

Total interaction energy = 26.2 kJ mol<sup>-1</sup>

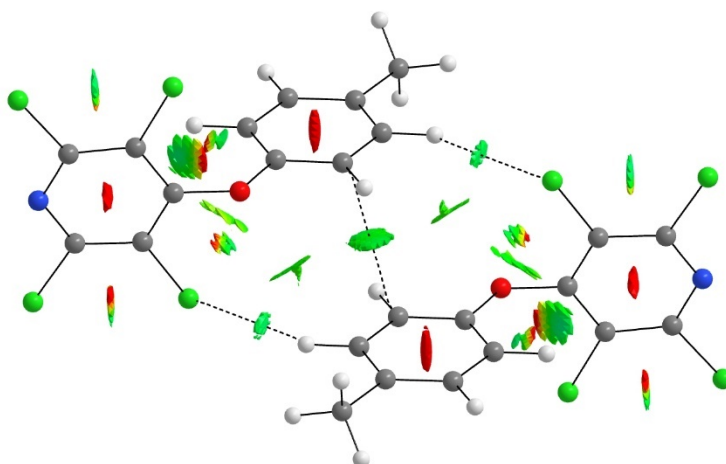

**Figure S129.** Bond critical paths (BCP) as dashed lines and reduced density gradient (RDG) isosurface (isovalue 0.5 mapped on a Blue-Green-Red color scale with values  $-0.02 < \rho^* \text{sign}\lambda_2 < 0.02$  a.u.) in pair.

**Table S31.** Distances, dissociation energies and Laplacian of electron density ( $\nabla^2\rho$ ) of bond critical paths (BCP) identified by QTAIM analysis.

| BCP    | BCP Distance<br>Å | BCP Dissociation Energy<br>kJ mol <sup>-1</sup> | $\nabla^2\rho$<br>e bohr <sup>-3</sup> |
|--------|-------------------|-------------------------------------------------|----------------------------------------|
| C...C  | 3.357             | 4.2                                             | 0.0227                                 |
| Cl...H | 2.973             | 3.3                                             | 0.0171                                 |
| Cl...H | 2.973             | 3.3                                             | 0.0171                                 |

**Table S32.** Donor contribution and stabilization energies in Lewis donor-acceptor (D-A) orbital interactions from NBO analysis. BD = bond, LP = lone pair.

| Donor   | D-A Stabilization Energy<br>kJ mol <sup>-1</sup> |
|---------|--------------------------------------------------|
| BD C-C  | 6.6                                              |
| LP Cl   | 3.5                                              |
| BD C-H  | 2.5                                              |
| BD Cl-C | 0.4                                              |

Compound **3** pair 4

Total interaction energy = 25.9 kJ mol<sup>-1</sup>

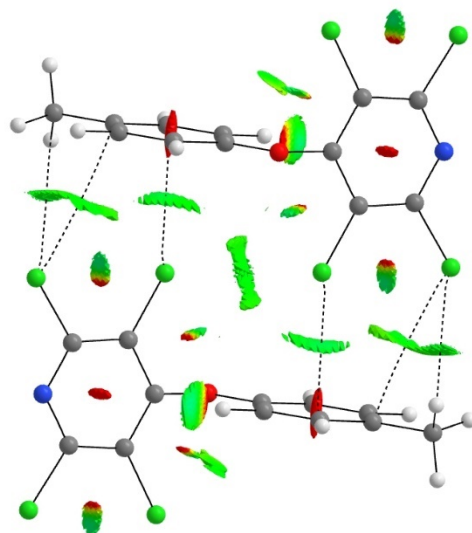

**Figure S130.** Bond critical paths (BCP) as dashed lines and reduced density gradient (RDG) isosurface (isovalue 0.5 mapped on a Blue-Green-Red color scale with values  $-0.02 < \rho \cdot \text{sign} \lambda_2 < 0.02$  a.u.) in pair.

**Table S33.** Distances, dissociation energies and Laplacian of electron density ( $\nabla^2\rho$ ) of bond critical paths (BCP) identified by QTAIM analysis.

| BCP    | BCP Distance<br>Å | BCP Dissociation Energy<br>kJ mol <sup>-1</sup> | $\nabla^2\rho$<br>e bohr <sup>-3</sup> |
|--------|-------------------|-------------------------------------------------|----------------------------------------|
| Cl...C | 3.395             | 4.2                                             | 0.0217                                 |
| Cl...H | 3.350             | 2.1                                             | 0.0134                                 |
| Cl...H | 3.350             | 2.1                                             | 0.0134                                 |
| Cl...C | 3.843             | 1.9                                             | 0.0099                                 |
| Cl...C | 3.843             | 1.9                                             | 0.0099                                 |

**Table S34.** Donor contribution and stabilization energies in Lewis donor-acceptor (D-A) orbital interactions from NBO analysis. BD = bond, LP = lone pair.

| Donor  | D-A Stabilization Energy<br>kJ mol <sup>-1</sup> |
|--------|--------------------------------------------------|
| LP Cl  | 4.2                                              |
| BD C-C | 2.3                                              |
| BD C-H | 1.1                                              |

Compound **3** pair 5

Total interaction energy = 13.2 kJ mol<sup>-1</sup>

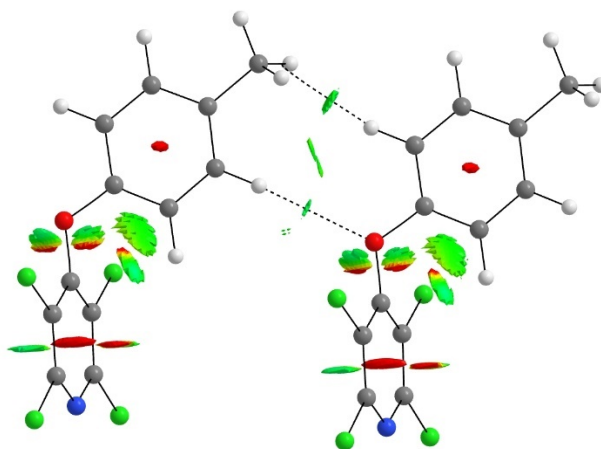

**Figure S131.** Bond critical paths (BCP) as dashed lines and reduced density gradient (RDG) isosurface (isovalue 0.5 mapped on a Blue-Green-Red color scale with values  $-0.02 < \rho^* \text{sign} \lambda_2 < 0.02$  a.u.) in pair.

**Table S35.** Distances, dissociation energies and Laplacian of electron density ( $\nabla^2\rho$ ) of bond critical paths (BCP) identified by QTAIM analysis.

| BCP   | BCP Distance<br>Å | BCP Dissociation Energy<br>kJ mol <sup>-1</sup> | $\nabla^2\rho$<br>e bohr <sup>-3</sup> |
|-------|-------------------|-------------------------------------------------|----------------------------------------|
| H...H | 2.410             | 3.7                                             | 0.0183                                 |
| O...H | 2.863             | 3.2                                             | 0.0136                                 |

**Table S36.** Donor contribution and stabilization energies in Lewis donor-acceptor (D-A) orbital interactions from NBO analysis. BD = bond, LP = lone pair.

| Donor  | D-A Stabilization Energy<br>kJ mol <sup>-1</sup> |
|--------|--------------------------------------------------|
| BD C-H | 1.8                                              |
| LP O   | 0.7                                              |

Compound **3** pair 6

Total interaction energy = 4.7 kJ mol<sup>-1</sup>

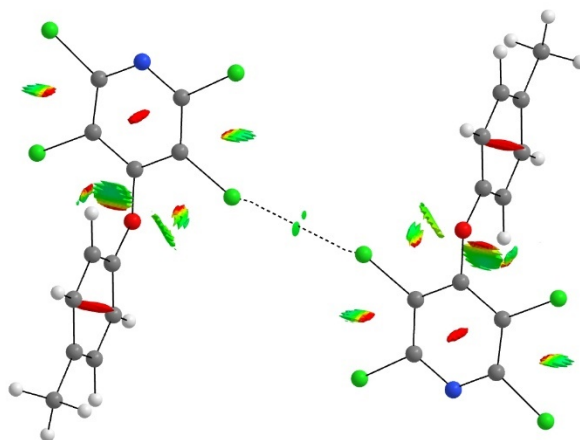

**Figure S132.** Bond critical paths (BCP) as dashed lines and reduced density gradient (RDG) isosurface (isovalue 0.5 mapped on a Blue-Green-Red color scale with values  $-0.02 < \rho^* \text{sign} \lambda_2 < 0.02$  a.u.) in pair.

**Table S37.** Distances, dissociation energies and Laplacian of electron density ( $\nabla^2\rho$ ) of bond critical paths (BCP) identified by QTAIM analysis.

| BCP     | BCP Distance<br>Å | BCP Dissociation Energy<br>kJ mol <sup>-1</sup> | $\nabla^2\rho$<br>e bohr <sup>-3</sup> |
|---------|-------------------|-------------------------------------------------|----------------------------------------|
| Cl...Cl | 3.590             | 2.6                                             | 0.0178                                 |

**Table S38.** Donor contribution and stabilization energies in Lewis donor-acceptor (D-A) orbital interactions from NBO analysis. BD = bond, LP = lone pair.

| Donor   | D-A Stabilization Energy<br>kJ mol <sup>-1</sup> |
|---------|--------------------------------------------------|
| LP Cl   | 2.8                                              |
| BD Cl-C | 0.6                                              |

Compound **4** pairs

Within in all pairs of compound **4**, there is an intramolecular BCP.

**Table S39.** Distance, dissociation energy and Laplacian of electron density ( $\nabla^2\rho$ ) of intramolecular bond critical path (BCP) identified by QTAIM analysis for compound **4**.

| BCP                   | BCP Distance<br>Å | BCP Dissociation Energy<br>kJ mol <sup>-1</sup> | $\nabla^2\rho$<br>e bohr <sup>-3</sup> |
|-----------------------|-------------------|-------------------------------------------------|----------------------------------------|
| Intramolecular Cl...C | 3.088             | 8.6                                             | 0.0454                                 |

Compound **4** pair 1

Total interaction energy = 78.5 kJ mol<sup>-1</sup>

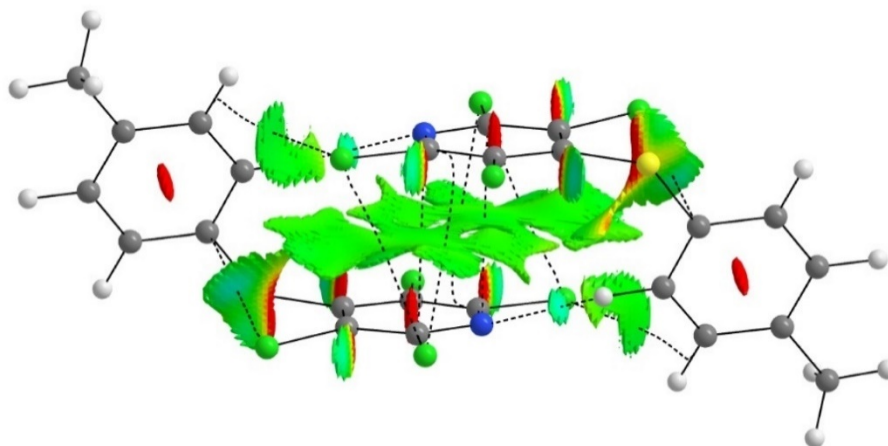

**Figure S133.** Bond critical paths (BCP) as dashed lines and reduced density gradient (RDG) isosurface (isovalue 0.5 mapped on a Blue-Green-Red color scale with values  $-0.02 < \rho^* \text{sign} \lambda_2 < 0.02$  a.u.) in pair.

**Table S40.** Distances, dissociation energies and Laplacian of electron density ( $\nabla^2\rho$ ) of bond critical paths (BCP) identified by QTAIM analysis.

| BCP          | BCP Distance<br>Å | BCP Dissociation Energy<br>kJ mol <sup>-1</sup> | $\nabla^2\rho$<br>e bohr <sup>-3</sup> |
|--------------|-------------------|-------------------------------------------------|----------------------------------------|
| N...H        | 2.624             | 6.1                                             | 0.0255                                 |
| N...H        | 2.624             | 6.1                                             | 0.0255                                 |
| N...C        | 3.546             | 3.0                                             | 0.0132                                 |
| N...C        | 3.546             | 3.0                                             | 0.0132                                 |
| Cl...mid C-H | 3.400             | 2.8                                             | 0.0165                                 |
| Cl...mid C-H | 3.400             | 2.8                                             | 0.0165                                 |
| Cl...C       | 3.699             | 2.8                                             | 0.0143                                 |
| Cl...C       | 3.699             | 2.8                                             | 0.0143                                 |
| Cl...Cl      | 3.823             | 2.4                                             | 0.0144                                 |
| Cl...Cl      | 3.823             | 2.4                                             | 0.0144                                 |

**Table S41.** Donor contribution and stabilization energies in Lewis donor-acceptor (D-A) orbital interactions from NBO analysis. BD = bond, LP = lone pair.

| Donor   | D-A Stabilization Energy<br>kJ mol <sup>-1</sup> |
|---------|--------------------------------------------------|
| LP N    | 5.5                                              |
| BD Cl-C | 3.4                                              |
| LP Cl   | 3.1                                              |
| BD N-C  | 2.9                                              |
| BD C-C  | 2.5                                              |
| BD C-H  | 1.7                                              |

Compound **4** pair 2

Total interaction energy = 42.9 kJ mol<sup>-1</sup>

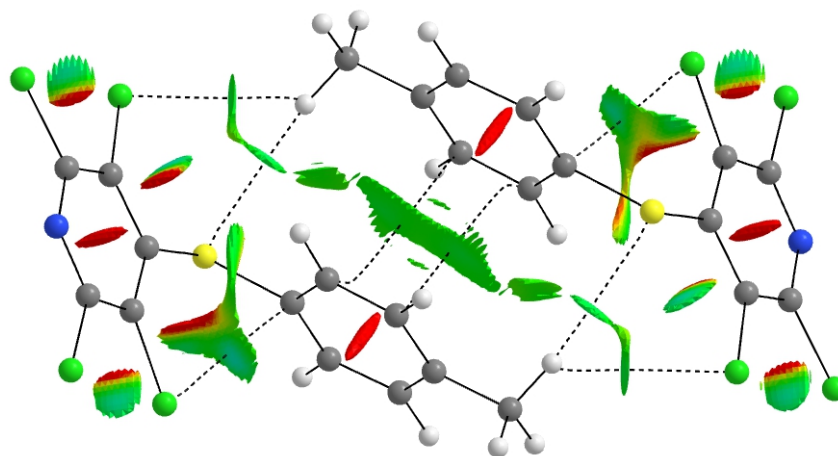

**Figure S134.** Bond critical paths (BCP) as dashed lines and reduced density gradient (RDG) isosurface (isovalue 0.5 mapped on a Blue-Green-Red color scale with values  $-0.02 < \rho^* \text{sign} \lambda_2 < 0.02$  a.u.) in pair.

**Table S42.** Distances, dissociation energies and Laplacian of electron density ( $\nabla^2\rho$ ) of bond critical paths (BCP) identified by QTAIM analysis.

| BCP    | BCP Distance<br>Å | BCP Dissociation Energy<br>kJ mol <sup>-1</sup> | $\nabla^2\rho$<br>e bohr <sup>-3</sup> |
|--------|-------------------|-------------------------------------------------|----------------------------------------|
| S...H  | 3.089             | 3.4                                             | 0.0158                                 |
| S...H  | 3.089             | 3.4                                             | 0.0158                                 |
| C...C  | 3.489             | 3.4                                             | 0.0151                                 |
| C...C  | 3.489             | 3.4                                             | 0.0151                                 |
| Cl...H | 3.160             | 2.6                                             | 0.0141                                 |
| Cl...H | 3.160             | 2.6                                             | 0.0141                                 |

**Table S43.** Donor contribution and stabilization energies in Lewis donor-acceptor (D-A) orbital interactions from NBO analysis. BD = bond, LP = lone pair.

| Donor   | D-A Stabilization Energy<br>kJ mol <sup>-1</sup> |
|---------|--------------------------------------------------|
| BD C-C  | 13.6                                             |
| LP S    | 4.9                                              |
| BD S-C  | 2.4                                              |
| BD C-H  | 0.6                                              |
| LP Cl   | 0.5                                              |
| BD Cl-C | 0.4                                              |

Compound 4 pair 3

Total interaction energy = 25.8 kJ mol<sup>-1</sup>

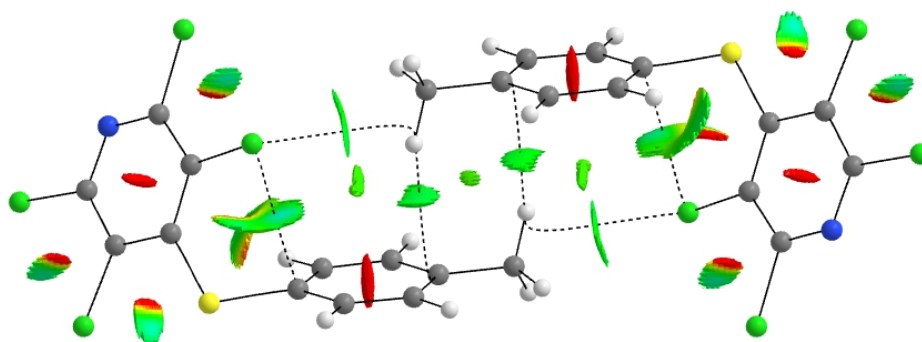

**Figure S135.** Bond critical paths (BCP) as dashed lines and reduced density gradient (RDG) isosurface (isovalue 0.5 mapped on a Blue-Green-Red color scale with values  $-0.02 < \rho^* \text{sign} \lambda_2 < 0.02$  a.u.) in pair.

**Table S44.** Distances, dissociation energies and Laplacian of electron density ( $\nabla^2\rho$ ) of bond critical paths (BCP) identified by QTAIM analysis.

| BCP    | BCP Distance<br>Å | BCP Dissociation Energy<br>kJ mol <sup>-1</sup> | $\nabla^2\rho$<br>e bohr <sup>-3</sup> |
|--------|-------------------|-------------------------------------------------|----------------------------------------|
| C...H  | 2.951             | 3.6                                             | 0.0143                                 |
| C...H  | 2.951             | 3.6                                             | 0.0143                                 |
| Cl...H | 3.170             | 2.9                                             | 0.0179                                 |
| Cl...H | 3.170             | 2.9                                             | 0.0179                                 |

**Table S45.** Donor contribution and stabilization energies in Lewis donor-acceptor (D-A) orbital interactions from NBO analysis. BD = bond, LP = lone pair.

| Donor   | D-A Stabilization Energy<br>kJ mol <sup>-1</sup> |
|---------|--------------------------------------------------|
| BD C-C  | 7.5                                              |
| LP Cl   | 2.4                                              |
| BD C-H  | 0.5                                              |
| BD Cl-C | 0.5                                              |

Compound **4** pair 4

Total interaction energy = 18.0 kJ mol<sup>-1</sup>

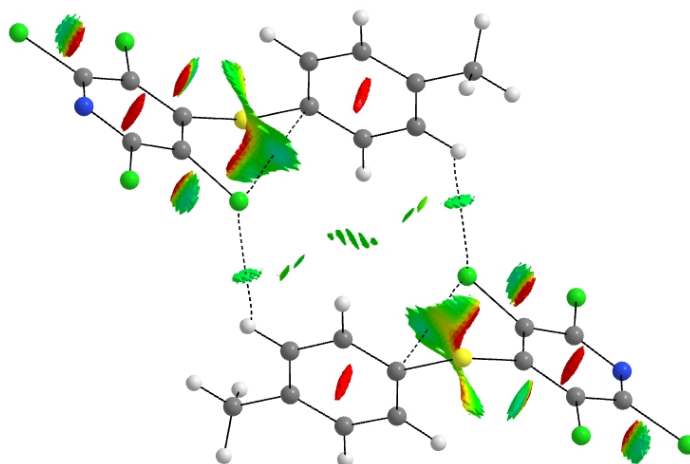

**Figure S136.** Bond critical paths (BCP) as dashed lines and reduced density gradient (RDG) isosurface (isovalue 0.5 mapped on a Blue-Green-Red color scale with values  $-0.02 < \rho \cdot \text{sign} \lambda_2 < 0.02$  a.u.) in pair.

**Table S46.** Distances, dissociation energies and Laplacian of electron density ( $\nabla^2\rho$ ) of bond critical paths (BCP) identified by QTAIM analysis.

| BCP    | BCP Distance<br>Å | BCP Dissociation Energy<br>kJ mol <sup>-1</sup> | $\nabla^2\rho$<br>e bohr <sup>-3</sup> |
|--------|-------------------|-------------------------------------------------|----------------------------------------|
| Cl...H | 3.018             | 3.3                                             | 0.0177                                 |
| Cl...H | 3.018             | 3.3                                             | 0.0177                                 |

**Table S47.** Donor contribution and stabilization energies in Lewis donor-acceptor (D-A) orbital interactions from NBO analysis. BD = bond, LP = lone pair.

| Donor   | D-A Stabilization Energy<br>kJ mol <sup>-1</sup> |
|---------|--------------------------------------------------|
| LP Cl   | 1.8                                              |
| BD Cl-C | 1.3                                              |
| BD C-H  | 0.6                                              |

Compound **4** pair 5

Total interaction energy = 11.9 kJ mol<sup>-1</sup>

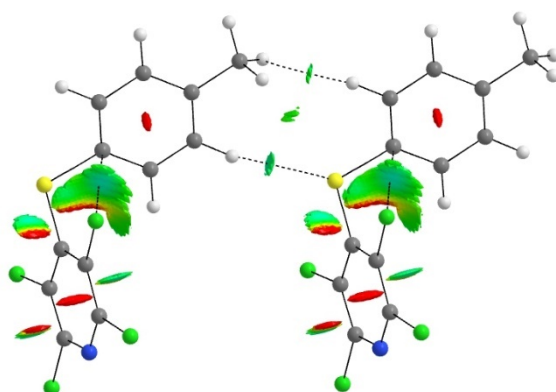

**Figure S137.** Bond critical paths (BCP) as dashed lines and reduced density gradient (RDG) isosurface (isovalue 0.5 mapped on a Blue-Green-Red color scale with values  $-0.02 < \rho^* \text{sign} \lambda_2 < 0.02$  a.u.) in pair.

**Table S48.** Distances, dissociation energies and Laplacian of electron density ( $\nabla^2\rho$ ) of bond critical paths (BCP) identified by QTAIM analysis.

| BCP   | BCP Distance<br>Å | BCP Dissociation Energy<br>kJ mol <sup>-1</sup> | $\nabla^2\rho$<br>e bohr <sup>-3</sup> |
|-------|-------------------|-------------------------------------------------|----------------------------------------|
| S...H | 2.863             | 4.9                                             | 0.0223                                 |
| H...H | 2.422             | 3.3                                             | 0.0147                                 |

**Table S49.** Donor contribution and stabilization energies in Lewis donor-acceptor (D-A) orbital interactions from NBO analysis. BD = bond, LP = lone pair.

| Donor  | D-A Stabilization Energy<br>kJ mol <sup>-1</sup> |
|--------|--------------------------------------------------|
| LP S   | 5.5                                              |
| BD C-H | 1.7                                              |

Compound **4** pair 6

Total interaction energy = 7.7 kJ mol<sup>-1</sup>

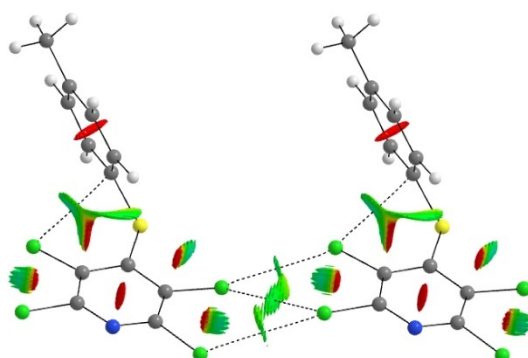

**Figure S138.** Bond critical paths (BCP) as dashed lines and reduced density gradient (RDG) isosurface (isovalue 0.5 mapped on a Blue-Green-Red color scale with values  $-0.02 < \rho \cdot \text{sign} \lambda_2 < 0.02$  a.u.) in pair.

**Table S50.** Distances, dissociation energies and Laplacian of electron density ( $\nabla^2\rho$ ) of bond critical paths (BCP) identified by QTAIM analysis.

| BCP     | BCP Distance<br>Å | BCP Dissociation Energy<br>kJ mol <sup>-1</sup> | $\nabla^2\rho$<br>e bohr <sup>-3</sup> |
|---------|-------------------|-------------------------------------------------|----------------------------------------|
| Cl...Cl | 3.407             | 5.2                                             | 0.0302                                 |
| Cl...Cl | 3.736             | 2.5                                             | 0.0170                                 |
| Cl...Cl | 3.685             | 2.4                                             | 0.0167                                 |

**Table S51.** Donor contribution and stabilization energies in Lewis donor-acceptor (D-A) orbital interactions from NBO analysis. BD = bond, LP = lone pair.

| Donor   | D-A Stabilization Energy<br>kJ mol <sup>-1</sup> |
|---------|--------------------------------------------------|
| LP Cl   | 7.2                                              |
| BD Cl-C | 0.7                                              |

Compound **4** pair 7

Total interaction energy = 5.1 kJ mol<sup>-1</sup>

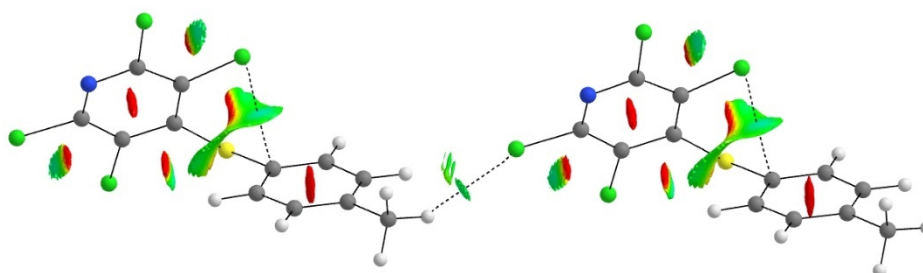

**Figure S139.** Bond critical paths (BCP) as dashed lines and reduced density gradient (RDG) isosurface (isovalue 0.5 mapped on a Blue-Green-Red color scale with values  $-0.02 < \rho^* \text{sign}\lambda_2 < 0.02$  a.u.) in pair.

**Table S52.** Distances, dissociation energies and Laplacian of electron density ( $\nabla^2\rho$ ) of bond critical paths (BCP) identified by QTAIM analysis.

| BCP    | BCP Distance<br>Å | BCP Dissociation Energy<br>kJ mol <sup>-1</sup> | $\nabla^2\rho$<br>e bohr <sup>-3</sup> |
|--------|-------------------|-------------------------------------------------|----------------------------------------|
| Cl...H | 2.889             | 4.0                                             | 0.0200                                 |

**Table S53.** Donor contribution and stabilization energies in Lewis donor-acceptor (D-A) orbital interactions from NBO analysis. BD = bond, LP = lone pair.

| Donor   | D-A Stabilization Energy<br>kJ mol <sup>-1</sup> |
|---------|--------------------------------------------------|
| BD C-H  | 1.9                                              |
| LP Cl   | 1.2                                              |
| BD Cl-C | 1.1                                              |

## Pairs with F...F Interactions

Compound 5 pair 2 containing F...F interactions

Total interaction energy = 41.9 kJ mol<sup>-1</sup>

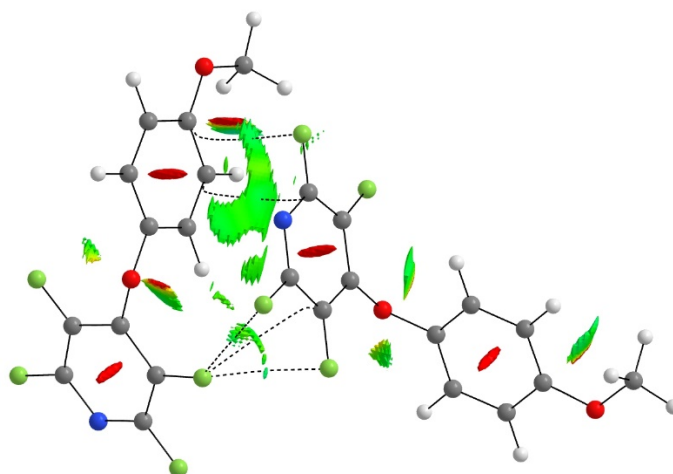

**Figure S140.** Bond critical paths (BCP) as dashed lines and reduced density gradient (RDG) isosurface (isovalue 0.5 mapped on a Blue-Green-Red color scale with values  $-0.02 < \rho \cdot \text{sign} \lambda_2 < 0.02$  a.u.) in pair.

**Table S54.** Distances, dissociation energies and Laplacian of electron densities ( $\nabla^2\rho$ ) of F...F bond critical paths (BCP) identified by QTAIM analysis and corresponding donor and acceptor contributions and stabilization energies in Lewis donor-acceptor orbital interactions from NBO analysis. LP = lone pair, BD\* = anti-bonding.

| Interaction | Distance<br>Å | BCP Dissociation<br>Energy<br>kJ mol <sup>-1</sup> | $\nabla^2\rho$<br>e bohr <sup>-3</sup> | Donor | Acceptor | D-A Stabilization<br>Energy<br>kJ mol <sup>-1</sup> |
|-------------|---------------|----------------------------------------------------|----------------------------------------|-------|----------|-----------------------------------------------------|
| F...F       | 2.895         | 7.7                                                | 0.0315                                 | LP F  | BD* C-C  | 0.79                                                |
| F...F       | 3.046         | 5.2                                                | 0.0241                                 | LP F  | BD* C-C  | 0.42                                                |

Compound **1** pair 2 containing F...F interactions

Total interaction energy = 34.4 kJ mol<sup>-1</sup>

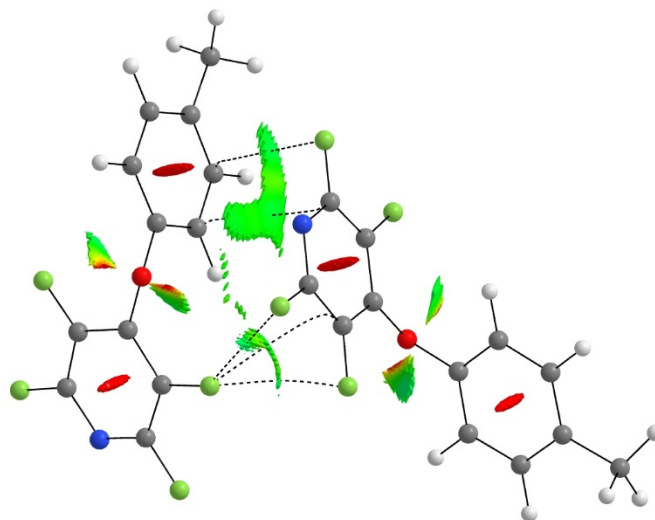

**Figure S141.** Bond critical paths (BCP) as dashed lines and reduced density gradient (RDG) isosurface (isovalue 0.5 mapped on a Blue-Green-Red color scale with values  $-0.02 < \rho^* \text{sign} \lambda_2 < 0.02$  a.u.) in pair.

**Table S55.** Distances, dissociation energies and Laplacian of electron densities ( $\nabla^2\rho$ ) of F...F bond critical paths (BCP) identified by QTAIM analysis and corresponding donor and acceptor contributions and stabilization energies in Lewis donor-acceptor orbital interactions from NBO analysis. LP = lone pair, BD\* = anti-bonding.

| Interaction | Distance<br>Å | BCP Dissociation<br>Energy<br>kJ mol <sup>-1</sup> | $\nabla^2\rho$<br>e bohr <sup>-3</sup> | Donor | Acceptor | D-A Stabilization<br>Energy<br>kJ mol <sup>-1</sup> |
|-------------|---------------|----------------------------------------------------|----------------------------------------|-------|----------|-----------------------------------------------------|
| F...F       | 2.940         | 6.9                                                | 0.0298                                 | LP F  | BD* C-C  | 0.79                                                |
| F...F       | 2.939         | 6.9                                                | 0.0299                                 | LP F  | BD* C-C  | 0.67                                                |

Compound **6** pair 2 containing F...F interaction

Total interaction energy = 39.2 kJ mol<sup>-1</sup>

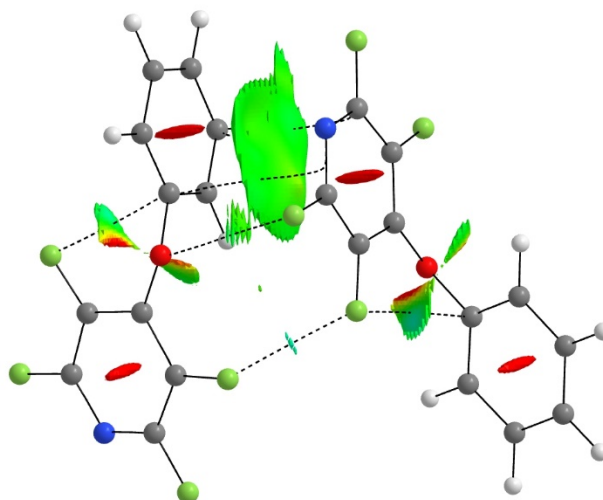

**Figure S142.** Bond critical paths (BCP) as dashed lines and reduced density gradient (RDG) isosurface (isovalue 0.5 mapped on a Blue-Green-Red color scale with values  $-0.02 < \rho^* \text{sign} \lambda_2 < 0.02$  a.u.) in pair.

**Table S56.** Distance, dissociation energy and Laplacian of electron density ( $\nabla^2\rho$ ) of F...F bond critical path (BCP) identified by QTAIM analysis and corresponding donor and acceptor contributions and stabilization energy in Lewis donor-acceptor orbital interaction from NBO analysis. LP = lone pair, BD\* = anti-bonding.

| Interaction | Distance<br>Å | BCP Dissociation<br>Energy<br>kJ mol <sup>-1</sup> | $\nabla^2\rho$<br>e bohr <sup>-3</sup> | Donor | Acceptor | D-A Stabilization<br>Energy<br>kJ mol <sup>-1</sup> |
|-------------|---------------|----------------------------------------------------|----------------------------------------|-------|----------|-----------------------------------------------------|
| F...F       | 2.816         | 4.4                                                | 0.0200                                 | LP F  | BD* C-C  | 0.50                                                |

Compound **8** pair 1 containing F...F interactions

Total interaction energy = 37.1 kJ mol<sup>-1</sup>

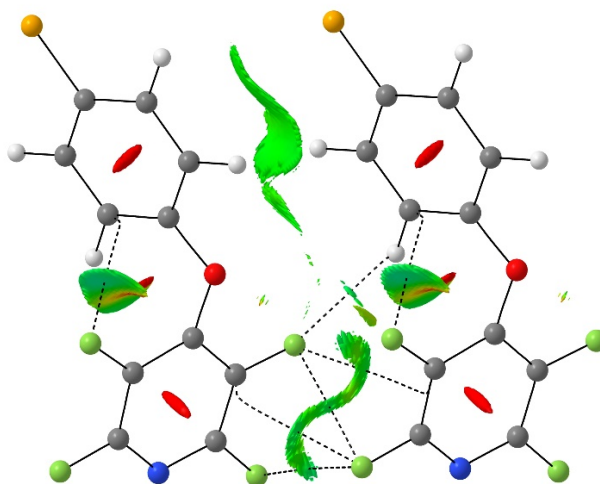

**Figure S143.** Bond critical paths (BCP) as dashed lines and reduced density gradient (RDG) isosurface (isovalue 0.5 mapped on a Blue-Green-Red color scale with values  $-0.02 < \rho^* \text{sign} \lambda_2 < 0.02$  a.u.) in pair.

**Table S57.** Distances, dissociation energies and Laplacian of electron densities ( $\nabla^2\rho$ ) of F...F bond critical paths (BCP) identified by QTAIM analysis and corresponding donor and acceptor contributions and stabilization energies in Lewis donor-acceptor orbital interactions from NBO analysis. LP = lone pair, BD\* = anti-bonding.

| Interaction | Distance<br>Å | BCP Dissociation<br>Energy<br>kJ mol <sup>-1</sup> | $\nabla^2\rho$<br>e bohr <sup>-3</sup> | Donor | Acceptor | D-A Stabilization<br>Energy<br>kJ mol <sup>-1</sup> |
|-------------|---------------|----------------------------------------------------|----------------------------------------|-------|----------|-----------------------------------------------------|
| F...F       | 2.940         | 7.9                                                | 0.0327                                 | LP F  | BD* C-C  | 0.79                                                |
| F...F       | 2.981         | 6.6                                                | 0.0287                                 | LP F  | BD* C-C  | 0.56                                                |
| F...F       | 3.015         | -                                                  | -                                      | LP F  | BD* C-C  | 0.67                                                |

Compound **8** pair 4 containing F...F interaction

Total interaction energy = 25.2 kJ mol<sup>-1</sup>

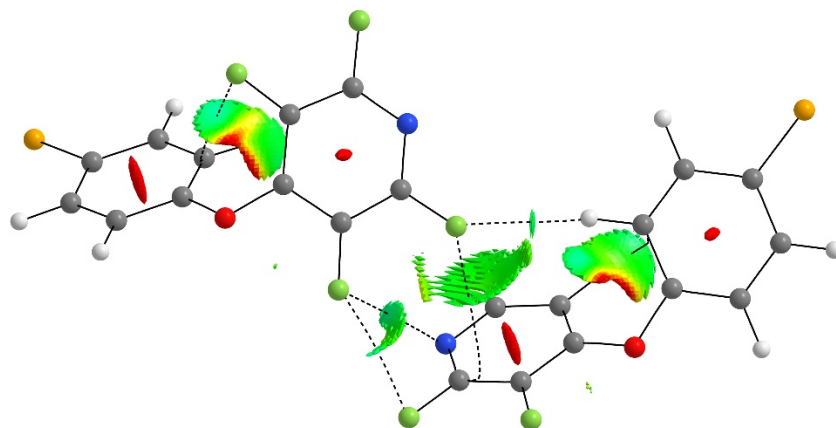

**Figure S144.** Bond critical paths (BCP) as dashed lines and reduced density gradient (RDG) isosurface (isovalue 0.5 mapped on a Blue-Green-Red color scale with values  $-0.02 < \rho^* \text{sign} \lambda_2 < 0.02$  a.u.) in pair.

**Table S58.** Distance, dissociation energy and Laplacian of electron density ( $\nabla^2\rho$ ) of F...F bond critical path (BCP) identified by QTAIM analysis and corresponding donor and acceptor contributions and stabilization energy in Lewis donor-acceptor orbital interaction from NBO analysis. LP = lone pair, BD\* = anti-bonding.

| Interaction | Distance<br>Å | BCP Dissociation<br>Energy<br>kJ mol <sup>-1</sup> | $\nabla^2\rho$<br>e bohr <sup>-3</sup> | Donor | Acceptor | D-A Stabilization<br>Energy<br>kJ mol <sup>-1</sup> |
|-------------|---------------|----------------------------------------------------|----------------------------------------|-------|----------|-----------------------------------------------------|
| F...F       | 2.902         | 7.4                                                | 0.0316                                 | LP F  | BD* C-C  | 0.75                                                |

Compound **7** pair 1 containing F...F interactions

Total interaction energy = 38.2 kJ mol<sup>-1</sup>

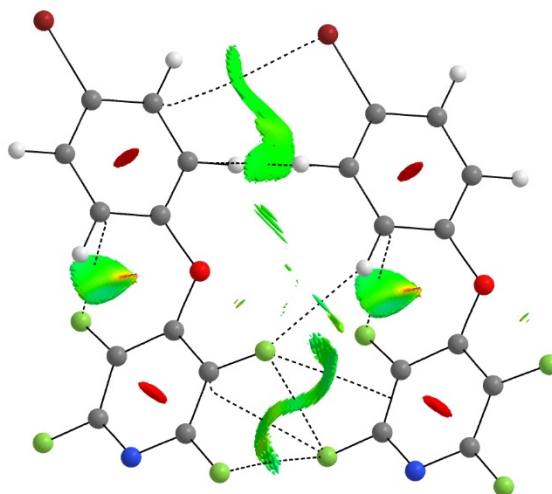

**Figure S145.** Bond critical paths (BCP) as dashed lines and reduced density gradient (RDG) isosurface (isovalue 0.5 mapped on a Blue-Green-Red color scale with values  $-0.02 < \rho^* \text{sign} \lambda_2 < 0.02$  a.u.) in pair.

**Table S59.** Distances, dissociation energies and Laplacian of electron densities ( $\nabla^2\rho$ ) of F...F bond critical paths (BCP) identified by QTAIM analysis and corresponding donor and acceptor contributions and stabilization energies in Lewis donor-acceptor orbital interactions from NBO analysis. LP = lone pair, BD\* = anti-bonding.

| Interaction | Distance<br>Å | BCP Dissociation<br>Energy<br>kJ mol <sup>-1</sup> | $\nabla^2\rho$<br>e bohr <sup>-3</sup> | Donor | Acceptor | D-A Stabilization<br>Energy<br>kJ mol <sup>-1</sup> |
|-------------|---------------|----------------------------------------------------|----------------------------------------|-------|----------|-----------------------------------------------------|
| F...F       | 2.917         | 8.5                                                | 0.0341                                 | LP F  | BD* C-C  | 0.71                                                |
| F...F       | 2.999         | 6.4                                                | 0.0258                                 | LP F  | BD* C-C  | 0.54                                                |
| F...F       | 3.009         | -                                                  | -                                      | LP F  | BD* C-C  | 0.67                                                |

Compound **7** pair 4 containing F...F interaction

Total interaction energy = 24.9 kJ mol<sup>-1</sup>

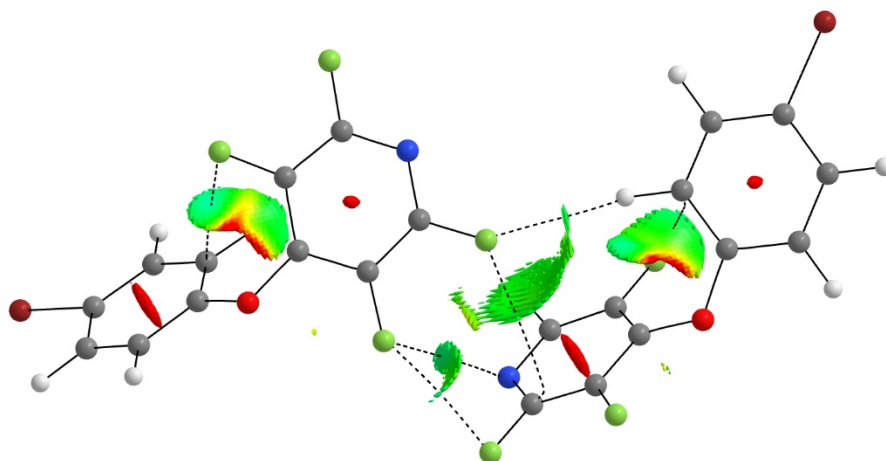

**Figure S146.** Bond critical paths (BCP) as dashed lines and reduced density gradient (RDG) isosurface (isovalue 0.5 mapped on a Blue-Green-Red color scale with values  $-0.02 < \rho^* \text{sign} \lambda_2 < 0.02$  a.u.) in pair.

**Table S60.** Distance, dissociation energy and Laplacian of electron density ( $\nabla^2\rho$ ) of F...F bond critical path (BCP) identified by QTAIM analysis and corresponding donor and acceptor contributions and stabilization energy in Lewis donor-acceptor orbital interaction from NBO analysis. LP = lone pair, BD\* = anti-bonding.

| Interaction | Distance<br>Å | BCP Dissociation<br>Energy<br>kJ mol <sup>-1</sup> | $\nabla^2\rho$<br>e bohr <sup>-3</sup> | Donor | Acceptor | D-A Stabilization<br>Energy<br>kJ mol <sup>-1</sup> |
|-------------|---------------|----------------------------------------------------|----------------------------------------|-------|----------|-----------------------------------------------------|
| F...F       | 2.886         | 7.8                                                | 0.0325                                 | LP F  | BD* C-C  | 0.79                                                |

Compound **9** pair 6 containing F...F interactions

Total interaction energy = 24.6 kJ mol<sup>-1</sup>

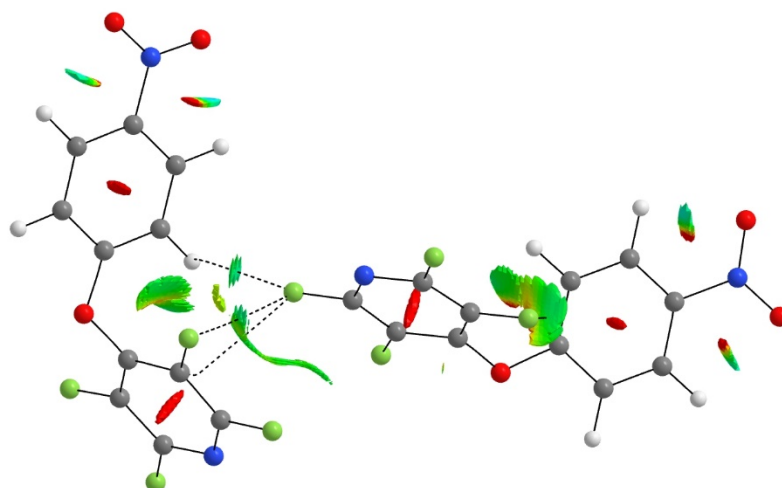

**Figure S147.** Bond critical paths (BCP) as dashed lines and reduced density gradient (RDG) isosurface (isovalue 0.5 mapped on a Blue-Green-Red color scale with values  $-0.02 < \rho^* \text{sign}\lambda_2 < 0.02$  a.u.) in pair.

**Table S61.** Distances, dissociation energy and Laplacian of electron density ( $\nabla^2\rho$ ) of F...F bond critical path (BCP) identified by QTAIM analysis and corresponding donor and acceptor contributions and stabilization energies in Lewis donor-acceptor orbital interactions from NBO analysis. LP = lone pair, BD\* = anti-bonding.

| Interaction | Distance<br>Å | BCP Dissociation<br>Energy<br>kJ mol <sup>-1</sup> | $\nabla^2\rho$<br>e bohr <sup>-3</sup> | Donor | Acceptor | D-A Stabilization<br>Energy<br>kJ mol <sup>-1</sup> |
|-------------|---------------|----------------------------------------------------|----------------------------------------|-------|----------|-----------------------------------------------------|
| F...F       | 2.836         | 9.9                                                | 0.0397                                 | LP F  | BD* C-C  | 1.38                                                |
| F...F       | 3.036         | -                                                  | -                                      | LP F  | BD* C-C  | 0.54                                                |

Compound **10** pair 5 containing F...F interaction

Total interaction energy = 2.5 kJ mol<sup>-1</sup>

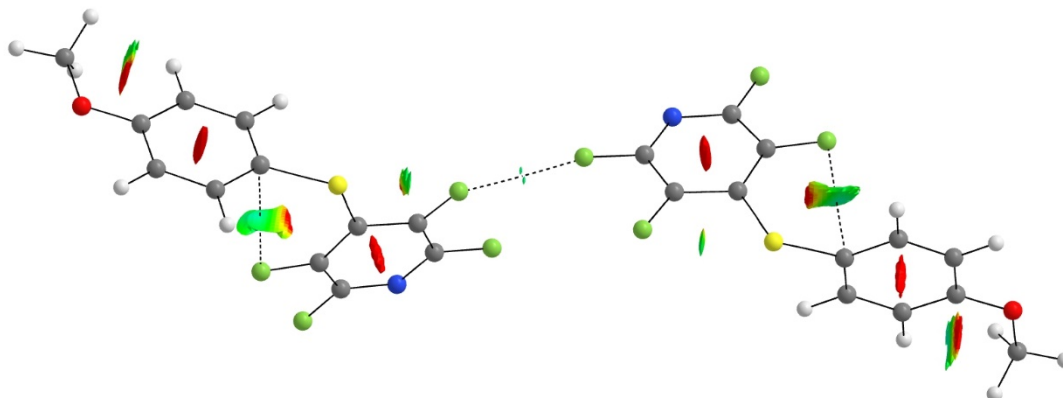

**Figure S148.** Bond critical paths (BCP) as dashed lines and reduced density gradient (RDG) isosurface (isovalue 0.5 mapped on a Blue-Green-Red color scale with values  $-0.02 < \rho^* \text{sign} \lambda_2 < 0.02$  a.u.) in pair.

**Table S62.** Distance, dissociation energy and Laplacian of electron density ( $\nabla^2\rho$ ) of F...F bond critical path (BCP) identified by QTAIM analysis. No donor-acceptor interaction found with NBO analysis.

| Interaction | Distance<br>Å | BCP Dissociation<br>Energy<br>kJ mol <sup>-1</sup> | $\nabla^2\rho$<br>e bohr <sup>-3</sup> | Donor | Acceptor | D-A Stabilization<br>Energy<br>kJ mol <sup>-1</sup> |
|-------------|---------------|----------------------------------------------------|----------------------------------------|-------|----------|-----------------------------------------------------|
| F...F       | 2.853         | 7.1                                                | 0.0305                                 | -     | -        | -                                                   |

Compound **2** pair 5 containing F...F interaction

Total interaction energy = 25.6 kJ mol<sup>-1</sup>

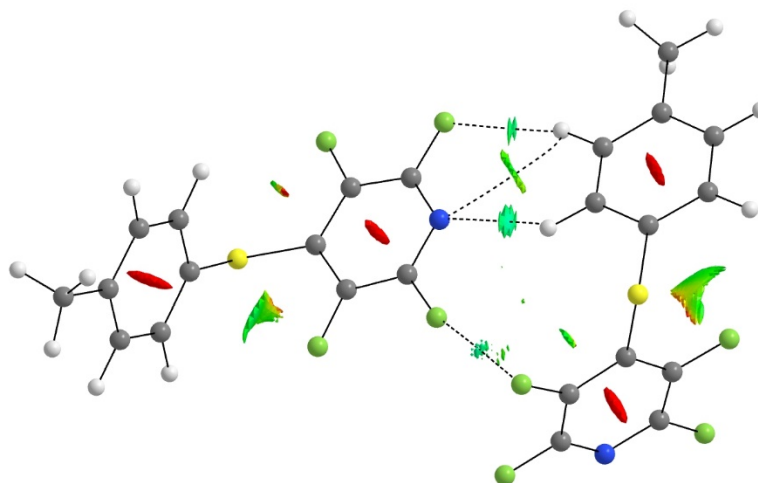

**Figure S149.** Bond critical paths (BCP) as dashed lines and reduced density gradient (RDG) isosurface (isovalue 0.5 mapped on a Blue-Green-Red color scale with values  $-0.02 < \rho^* \text{sign} \lambda_2 < 0.02$  a.u.) in pair.

**Table S63.** Distance, dissociation energy and Laplacian of electron density ( $\nabla^2\rho$ ) of F...F bond critical path (BCP) identified by QTAIM analysis and corresponding donor and acceptor contributions and stabilization energy in Lewis donor-acceptor orbital interaction from NBO analysis. LP = lone pair, BD\* = anti-bonding.

| Interaction | Distance<br>Å | BCP Dissociation<br>Energy<br>kJ mol <sup>-1</sup> | $\nabla^2\rho$<br>e bohr <sup>-3</sup> | Donor | Acceptor | D-A Stabilization<br>Energy<br>kJ mol <sup>-1</sup> |
|-------------|---------------|----------------------------------------------------|----------------------------------------|-------|----------|-----------------------------------------------------|
| F...F       | 2.851         | 8.1                                                | 0.0330                                 | LP F  | BD* C-C  | 0.88                                                |

Compound **11** pair 3 containing F...F interaction

Total interaction energy = 30.7 kJ mol<sup>-1</sup>

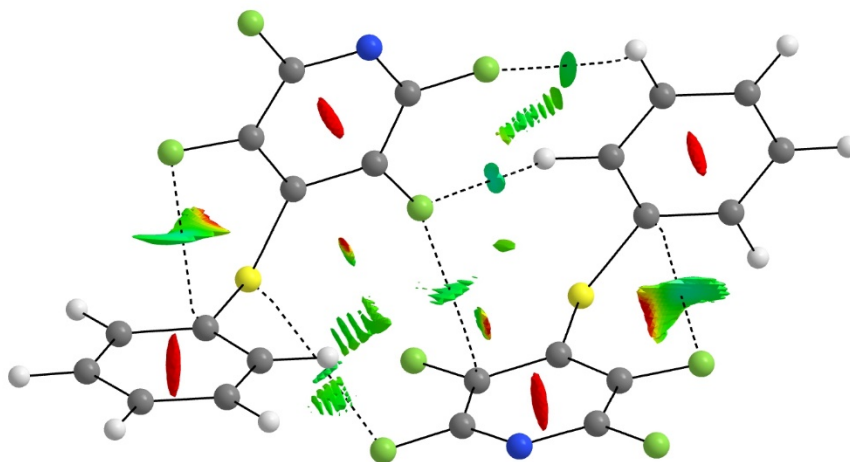

**Figure S150.** Bond critical paths (BCP) as dashed lines and reduced density gradient (RDG) isosurface (isovalue 0.5 mapped on a Blue-Green-Red color scale with values  $-0.02 < \rho^* \text{sign} \lambda_2 < 0.02$  a.u.) in pair.

**Table S64.** Distance, stabilization energy in Lewis donor-acceptor orbital interaction from NBO analysis. LP = lone pair, BD\* = anti-bonding. BCP for F...F not located.

| Interaction | Distance<br>Å | BCP Dissociation<br>Energy<br>kJ mol <sup>-1</sup> | $\nabla^2 \rho$<br>e bohr <sup>-3</sup> | Donor | Acceptor | D-A Stabilization<br>Energy<br>kJ mol <sup>-1</sup> |
|-------------|---------------|----------------------------------------------------|-----------------------------------------|-------|----------|-----------------------------------------------------|
| F...F       | 3.202         | -                                                  | -                                       | LP F  | BD* C-C  | 0.29                                                |

Compound **13** pair 1 containing F...F interaction

Total interaction energy = 35.5 kJ mol<sup>-1</sup>

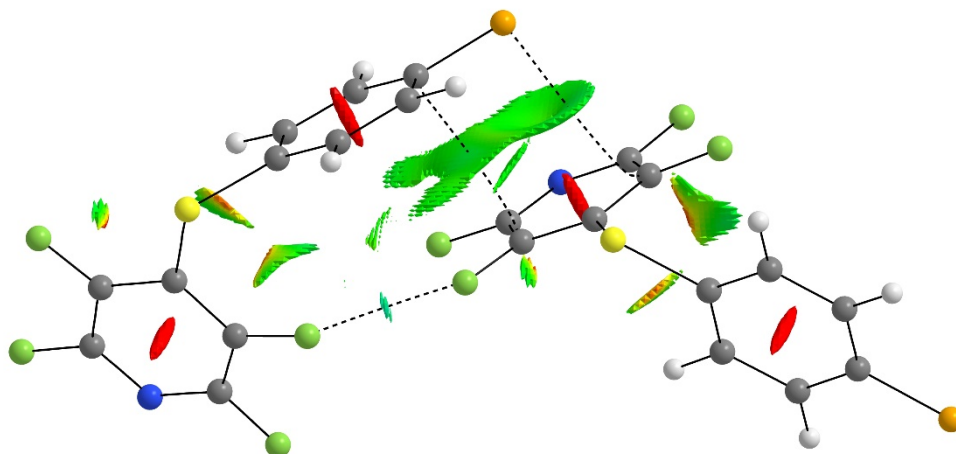

**Figure S151.** Bond critical paths (BCP) as dashed lines and reduced density gradient (RDG) isosurface (isovalue 0.5 mapped on a Blue-Green-Red color scale with values  $-0.02 < \rho^* \text{sign}\lambda_2 < 0.02$  a.u.) in pair.

**Table S65.** Distance, dissociation energy and Laplacian of electron density ( $\nabla^2\rho$ ) of F...F bond critical path (BCP) identified by QTAIM analysis and corresponding donor and acceptor contributions and stabilization energy in Lewis donor-acceptor orbital interaction from NBO analysis. LP = lone pair, BD\* = anti-bonding.

| Interaction | Distance<br>Å | BCP Dissociation<br>Energy<br>kJ mol <sup>-1</sup> | $\nabla^2\rho$<br>e bohr <sup>-3</sup> | Donor | Acceptor | D-A Stabilization<br>Energy<br>kJ mol <sup>-1</sup> |
|-------------|---------------|----------------------------------------------------|----------------------------------------|-------|----------|-----------------------------------------------------|
| F...F       | 2.780         | 9.3                                                | 0.369                                  | LP F  | BD* C-C  | 0.71                                                |

Compound **12** pair 3 containing F...F interactions

Total interaction energy = 38.9 kJ mol<sup>-1</sup>

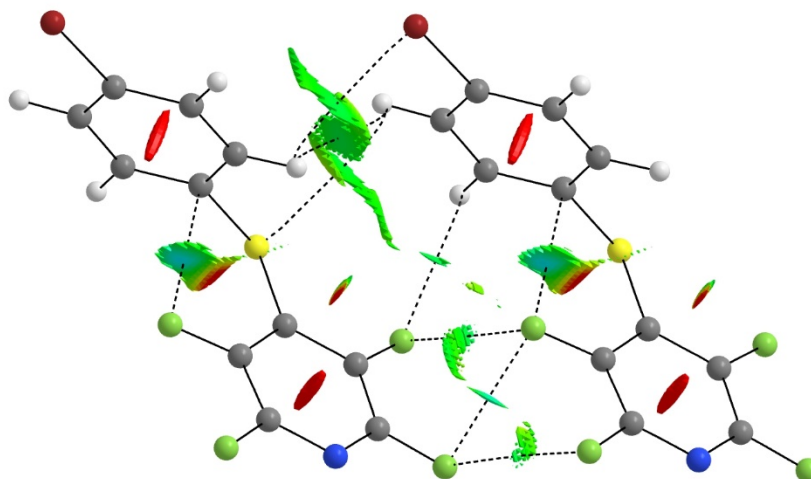

**Figure S152.** Bond critical paths (BCP) as dashed lines and reduced density gradient (RDG) isosurface (isovalue 0.5 mapped on a Blue-Green-Red color scale with values  $-0.02 < \rho^* \text{sign} \lambda_2 < 0.02$  a.u.) in pair.

**Table S66.** Distances, dissociation energies and Laplacian of electron densities ( $\nabla^2\rho$ ) of F...F bond critical paths (BCP) identified by QTAIM analysis and corresponding donor and acceptor contributions and stabilization energies in Lewis donor-acceptor orbital interactions from NBO analysis. LP = lone pair, BD\* = anti-bonding.

| Interaction | Distance<br>Å | BCP Dissociation<br>Energy<br>kJ mol <sup>-1</sup> | $\nabla^2\rho$<br>e bohr <sup>-3</sup> | Donor | Acceptor | D-A Stabilization<br>Energy<br>kJ mol <sup>-1</sup> |
|-------------|---------------|----------------------------------------------------|----------------------------------------|-------|----------|-----------------------------------------------------|
| F...F       | 2.830         | 10.2                                               | 0.0384                                 | LP F  | BD* C-C  | 1.34                                                |
| F...F       | 3.044         | 5.6                                                | 0.0255                                 | LP F  | BD* C-C  | 0.25                                                |
| F...F       | 3.131         | 4.2                                                | 0.0210                                 | -     | -        | -                                                   |

Compound **12** pair 5 containing F...F interactions

Total interaction energy = 19.9 kJ mol<sup>-1</sup>

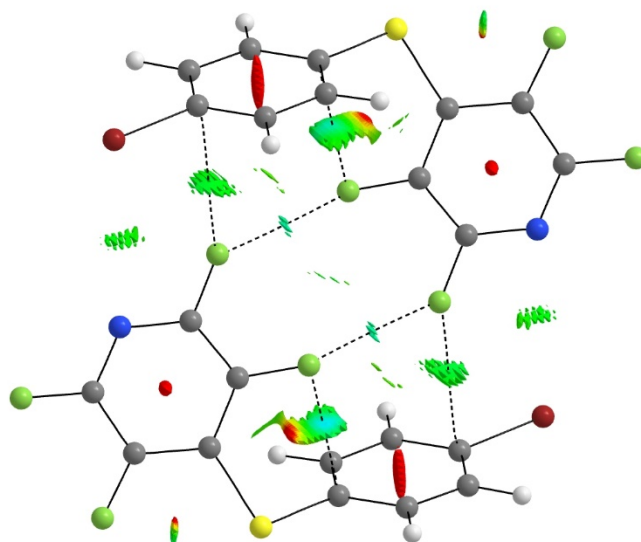

**Figure S153.** Bond critical paths (BCP) as dashed lines and reduced density gradient (RDG) isosurface (isovalue 0.5 mapped on a Blue-Green-Red color scale with values  $-0.02 < \rho^* \text{sign} \lambda_2 < 0.02$  a.u.) in pair.

**Table S67.** Distances, dissociation energies and Laplacian of electron densities ( $\nabla^2\rho$ ) of F...F bond critical paths (BCP) identified by QTAIM analysis and corresponding donor and acceptor contributions and stabilization energies in Lewis donor-acceptor orbital interactions from NBO analysis. LP = lone pair, BD\* = anti-bonding.

| Interaction | Distance<br>Å | BCP Dissociation<br>Energy<br>kJ mol <sup>-1</sup> | $\nabla^2\rho$<br>e bohr <sup>-3</sup> | Donor | Acceptor | D-A Stabilization<br>Energy<br>kJ mol <sup>-1</sup> |
|-------------|---------------|----------------------------------------------------|----------------------------------------|-------|----------|-----------------------------------------------------|
| F...F       | 2.819         | 8.5                                                | 0.0342                                 | LP F  | BD* C-C  | 0.21                                                |
| F...F       | 2.819         | 8.5                                                | 0.0342                                 | LP F  | BD* C-C  | 0.21                                                |

Compound **12** pair 7 containing F...F interactions

Total interaction energy = 5.3 kJ mol<sup>-1</sup>

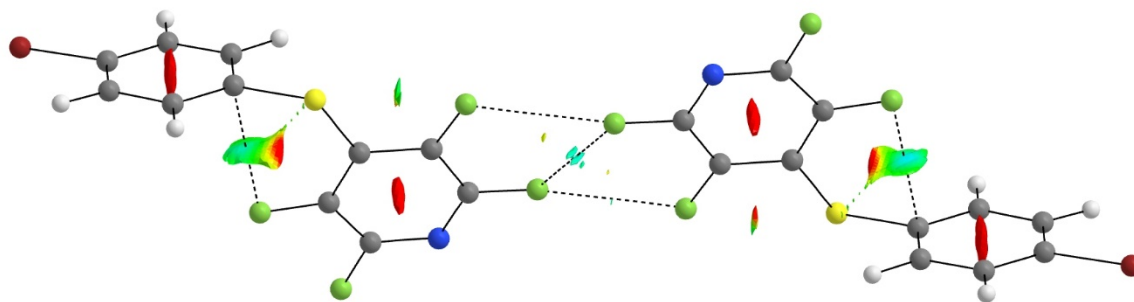

**Figure S154.** Bond critical paths (BCP) as dashed lines and reduced density gradient (RDG) isosurface (isovalue 0.5 mapped on a Blue-Green-Red color scale with values  $-0.02 < \rho^* \text{sign} \lambda_2 < 0.02$  a.u.) in pair.

**Table S68.** Distances, dissociation energies and Laplacian of electron densities ( $\nabla^2 \rho$ ) of F...F bond critical paths (BCP) identified by QTAIM analysis and corresponding donor and acceptor contributions and stabilization energies in Lewis donor-acceptor orbital interactions from NBO analysis. LP = lone pair, BD\* = anti-bonding.

| Interaction | Distance<br>Å | BCP Dissociation<br>Energy<br>kJ mol <sup>-1</sup> | $\nabla^2 \rho$<br>e bohr <sup>-3</sup> | Donor | Acceptor | D-A Stabilization<br>Energy<br>kJ mol <sup>-1</sup> |
|-------------|---------------|----------------------------------------------------|-----------------------------------------|-------|----------|-----------------------------------------------------|
| F...F       | 2.816         | 9.5                                                | 0.0371                                  | LP F  | BD* C-C  | 0.42                                                |
| F...F       | 2.899         | 6.8                                                | 0.0292                                  | LP F  | BD* C-C  | 0.25                                                |
| F...F       | 2.899         | 6.8                                                | 0.0291                                  | LP F  | BD* C-C  | 0.25                                                |

Compound **14** pair 1 containing F...F interactions

Total interaction energy = 47.8 kJ mol<sup>-1</sup>

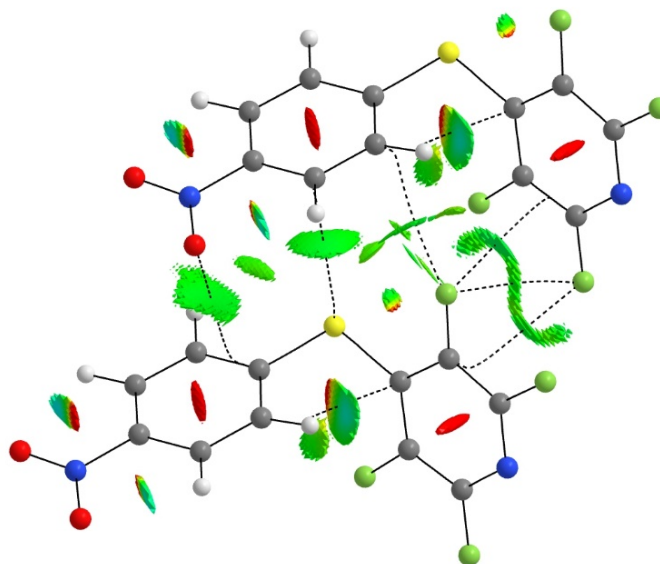

**Figure S155.** Bond critical paths (BCP) as dashed lines and reduced density gradient (RDG) isosurface (isovalue 0.5 mapped on a Blue-Green-Red color scale with values  $-0.02 < \rho^* \text{sign} \lambda_2 < 0.02$  a.u.) in pair.

**Table S69.** Distances, dissociation energy and Laplacian of electron densities ( $\nabla^2\rho$ ) of F...F bond critical path (BCP) identified by QTAIM analysis and corresponding donor and acceptor contributions and stabilization energies in Lewis donor-acceptor orbital interactions from NBO analysis. LP = lone pair, BD\* = anti-bonding.

| Interaction | Distance<br>Å | BCP Dissociation<br>Energy<br>kJ mol <sup>-1</sup> | $\nabla^2\rho$<br>e bohr <sup>-3</sup> | Donor | Acceptor | D-A Stabilization<br>Energy<br>kJ mol <sup>-1</sup> |
|-------------|---------------|----------------------------------------------------|----------------------------------------|-------|----------|-----------------------------------------------------|
| F...F       | 3.012         | 6.6                                                | 0.0295                                 | LP F  | BD* C-C  | 0.42                                                |
| F...F       | 3.054         | -                                                  | -                                      | LP F  | BD* C-C  | 0.29                                                |
| F...F       | 3.083         | -                                                  | -                                      | LP F  | BD* C-C  | 0.29                                                |

Compound **14** pair 2 containing F...F interaction

Total interaction energy = 31.9 kJ mol<sup>-1</sup>

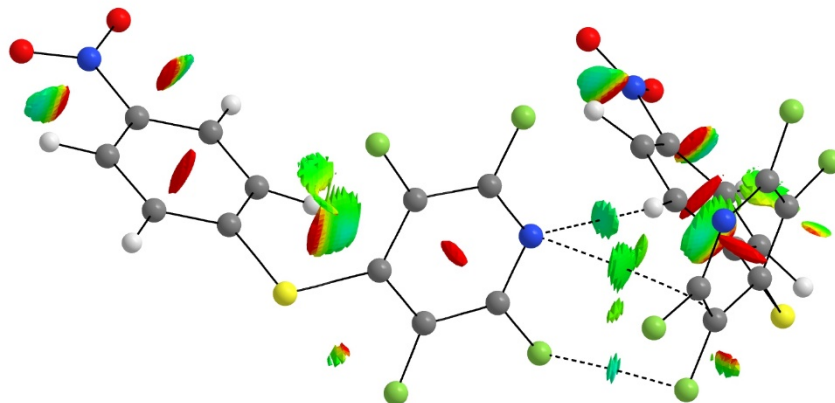

**Figure S156.** Bond critical paths (BCP) as dashed lines and reduced density gradient (RDG) isosurface (isovalue 0.5 mapped on a Blue-Green-Red color scale with values  $-0.02 < \rho^* \text{sign} \lambda_2 < 0.02$  a.u.) in pair.

**Table S70.** Distance, dissociation energy and Laplacian of electron density ( $\nabla^2 \rho$ ) of F...F bond critical path (BCP) identified by QTAIM analysis and corresponding donor and acceptor contributions and stabilization energy in Lewis donor-acceptor orbital interaction from NBO analysis. LP = lone pair, BD\* = anti-bonding.

| Interaction | Distance<br>Å | BCP Dissociation<br>Energy<br>kJ mol <sup>-1</sup> | $\nabla^2 \rho$<br>e bohr <sup>-3</sup> | Donor | Acceptor | D-A Stabilization<br>Energy<br>kJ mol <sup>-1</sup> |
|-------------|---------------|----------------------------------------------------|-----------------------------------------|-------|----------|-----------------------------------------------------|
| F...F       | 2.858         | 9.3                                                | 0.348                                   | LP F  | BD* C-C  | 0.79                                                |

## Intramolecular interactions

**Table S80.** Distance, dissociation energy and Laplacian of electron density ( $\nabla^2\rho$ ) of intramolecular bond critical path (BCP) identified by QTAIM analysis. Donor contribution and stabilization energies in Lewis donor-acceptor (D-A) orbital intramolecular interactions from NBO analysis. BD\* = antibonding, LP = lone pair, BD = bond, 3C\* 3-center C-C-C antibonding. Two independent molecules in a crystal structure are denoted as molecules A and B here.

| Molecule       | BCP    | BCP Distance<br>Å | BCP<br>Dissociation<br>Energy<br>kJ mol <sup>-1</sup> | $\nabla^2\rho$<br>e bohr <sup>-3</sup> | D-A<br>type     | D-A<br>Stabilization<br>Energy<br>kJ mol <sup>-1</sup> |
|----------------|--------|-------------------|-------------------------------------------------------|----------------------------------------|-----------------|--------------------------------------------------------|
| TFP ethers     | -      | -                 | -                                                     | -                                      | -               | -                                                      |
| <b>1</b>       | -      | -                 | -                                                     | -                                      | -               | -                                                      |
| <b>5</b>       | -      | -                 | -                                                     | -                                      | -               | -                                                      |
| <b>6</b>       | F...C  | 2.814             | 12.3                                                  | 0.0478                                 | LP F...BD* C-C  | 2.6                                                    |
| <b>7</b>       | F...C  | 2.869             | 11.0                                                  | 0.0451                                 | -               | -                                                      |
| <b>8</b>       | F...C  | 2.876             | 10.9                                                  | 0.0450                                 | -               | -                                                      |
| <b>9A</b>      | F...C  | 2.983             | 8.3                                                   | 0.0377                                 | -               | -                                                      |
| <b>9B</b>      | -      | -                 | -                                                     | -                                      | -               | -                                                      |
| <b>10</b>      | F...C  | 2.829             | 12.4                                                  | 0.0456                                 | -               | -                                                      |
| TFP thioethers | -      | -                 | -                                                     | -                                      | -               | -                                                      |
| <b>2A</b>      | -      | -                 | -                                                     | -                                      | -               | -                                                      |
| <b>2B</b>      | -      | -                 | -                                                     | -                                      | -               | -                                                      |
| <b>11A</b>     | F...C  | 2.890             | 11.0                                                  | 0.0431                                 | -               | -                                                      |
| <b>11B</b>     | -      | -                 | -                                                     | -                                      | -               | -                                                      |
| <b>12</b>      | F...C  | 2.765             | 14.0                                                  | 0.0511                                 | LP F...BD* C-C  | 2.5                                                    |
| <b>13</b>      | -      | -                 | -                                                     | -                                      | -               | -                                                      |
| <b>14</b>      | C...H  | 2.494             | 12.0                                                  | 0.0524                                 | BD C-H...3C*    | 2.8                                                    |
| <b>19</b>      | -      | -                 | -                                                     | -                                      | -               | -                                                      |
| TCP ethers     | -      | -                 | -                                                     | -                                      | -               | -                                                      |
| <b>3</b>       | -      | -                 | -                                                     | -                                      | -               | -                                                      |
| <b>16A</b>     | -      | -                 | -                                                     | -                                      | -               | -                                                      |
| <b>16B</b>     | -      | -                 | -                                                     | -                                      | -               | -                                                      |
| <b>17A</b>     | -      | -                 | -                                                     | -                                      | -               | -                                                      |
| <b>17B</b>     | -      | -                 | -                                                     | -                                      | -               | -                                                      |
| <b>18A</b>     | -      | -                 | -                                                     | -                                      | -               | -                                                      |
| <b>18B</b>     | -      | -                 | -                                                     | -                                      | -               | -                                                      |
| TCP thioethers | -      | -                 | -                                                     | -                                      | -               | -                                                      |
| <b>4</b>       | Cl...C | 3.088             | 8.6                                                   | 0.0454                                 | LP Cl...BD* C-C | 2.8                                                    |
| <b>20A</b>     | -      | -                 | -                                                     | -                                      | -               | -                                                      |
| <b>20B</b>     | -      | -                 | -                                                     | -                                      | -               | -                                                      |
| <b>21A</b>     | -      | -                 | -                                                     | -                                      | -               | -                                                      |
| <b>21B</b>     | -      | -                 | -                                                     | -                                      | -               | -                                                      |
| <b>22</b>      | Cl...C | 3.029             | 12.3                                                  | 0.0492                                 | LP Cl...BD* C-C | 5.3                                                    |

**Figure S157.** Intramolecular interactions in independent molecules. Dash lines show BCP identified by QTAIM analysis. Red circles highlight favorable NCI-RDG intramolecular interactions (Blue = strong and blue green = weak).

### TFP ethers

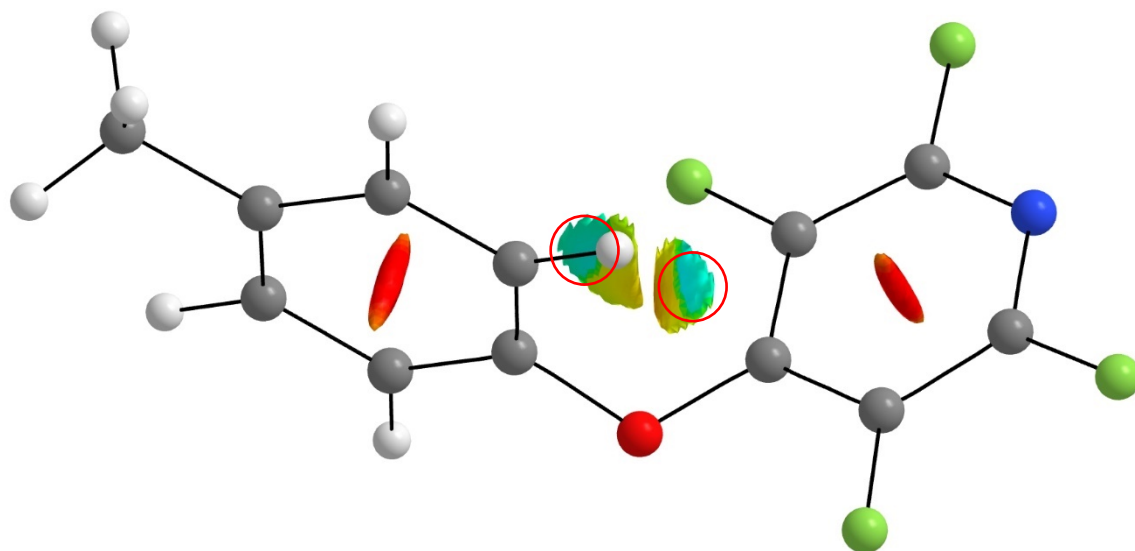

**1**

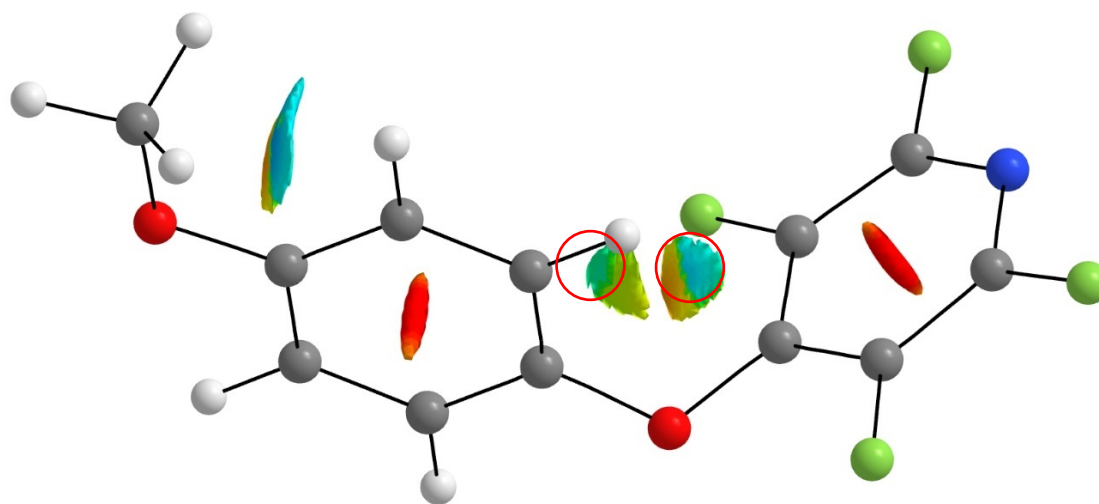

**5**

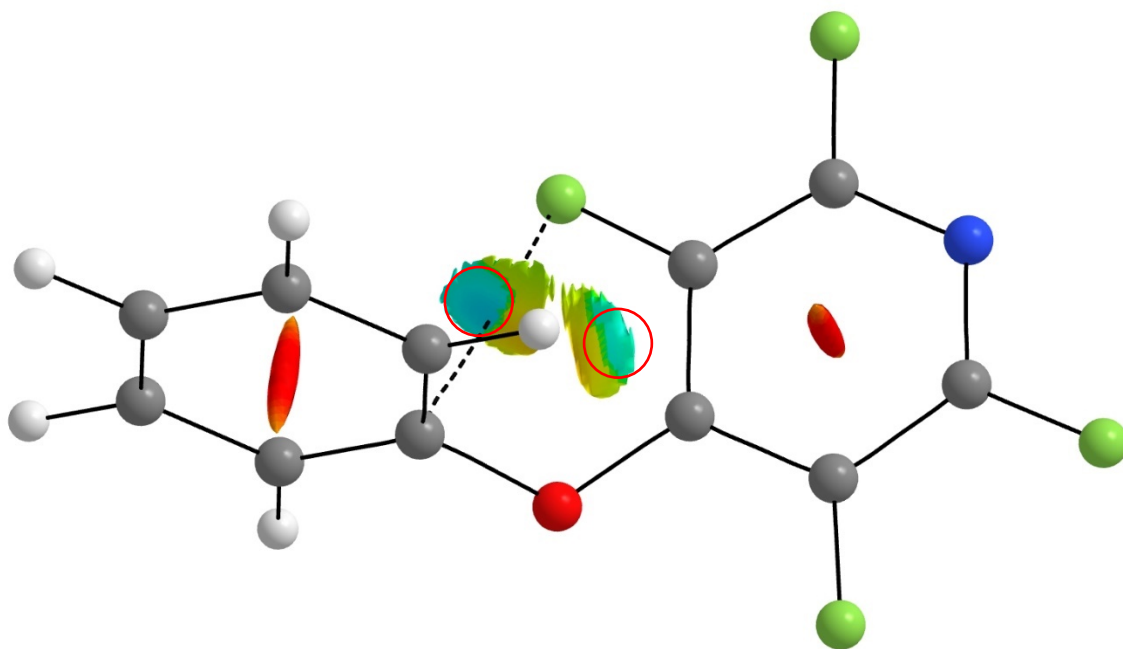

6

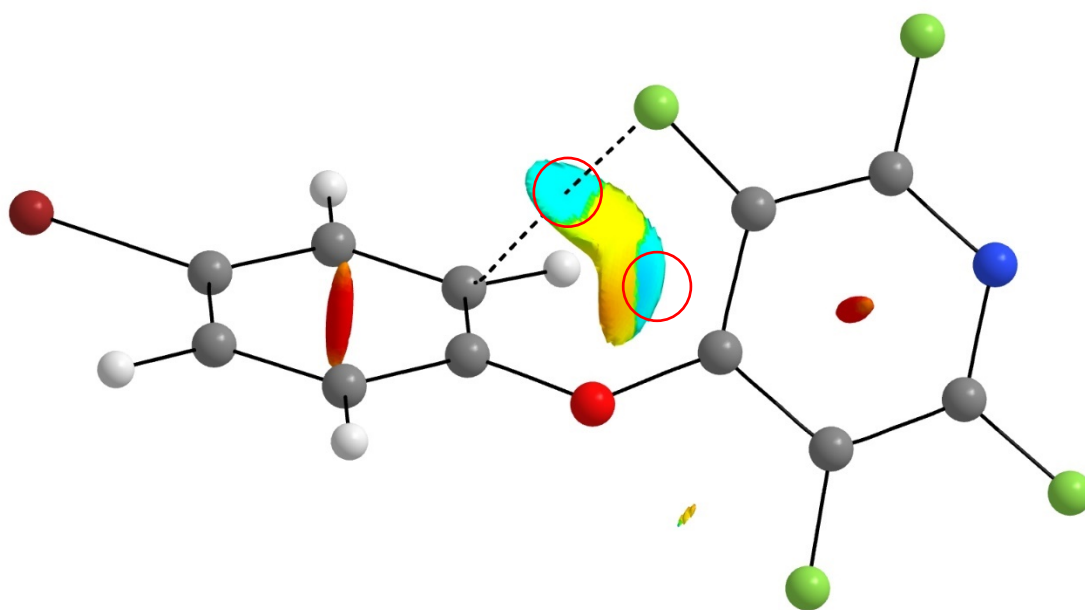

7

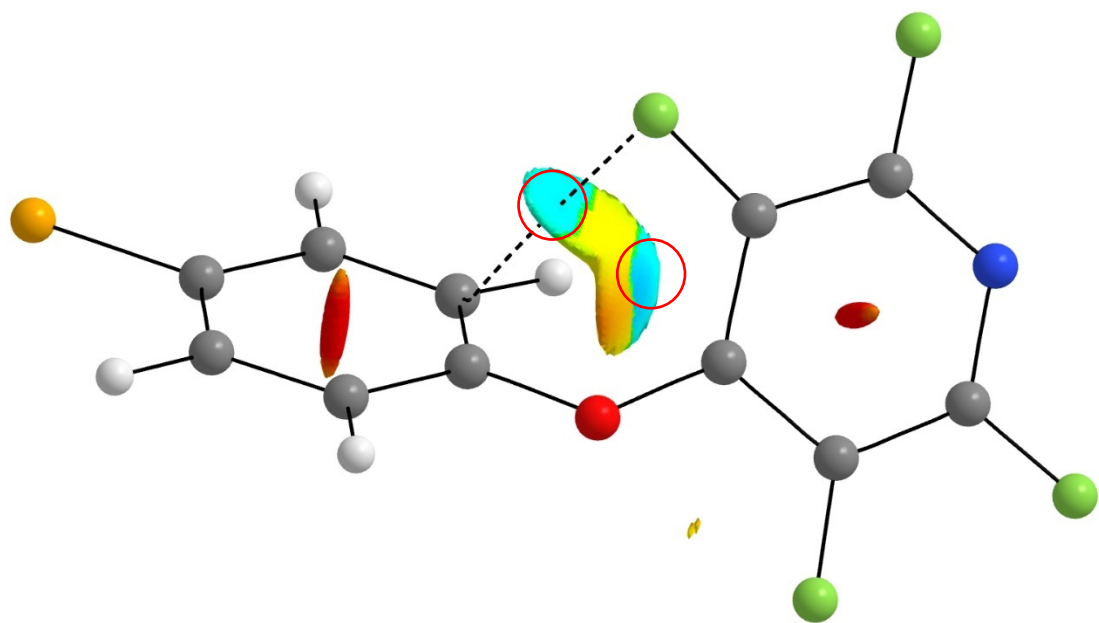

8

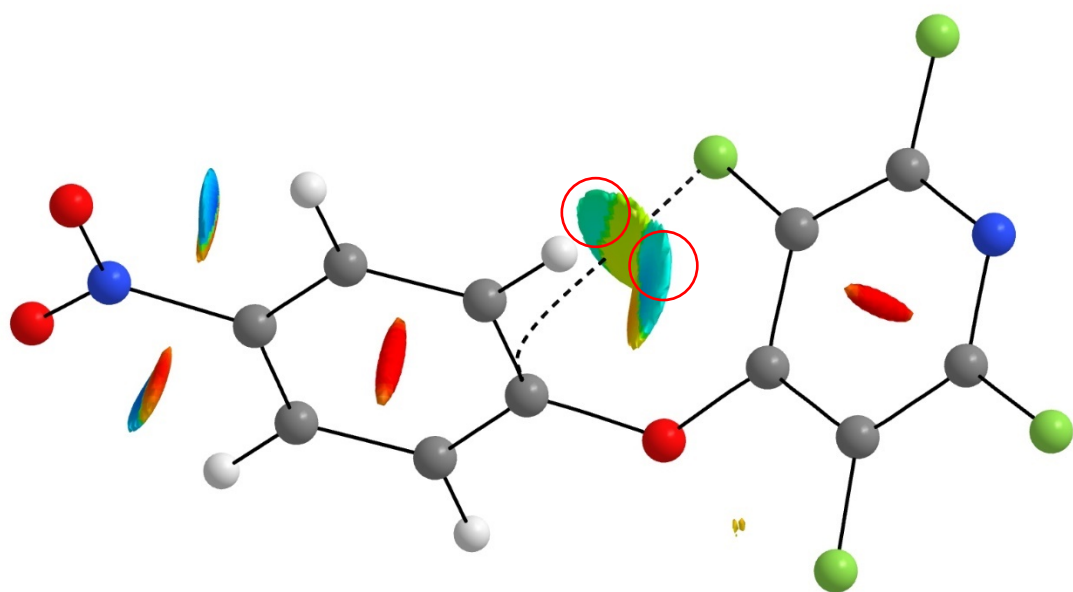

9A

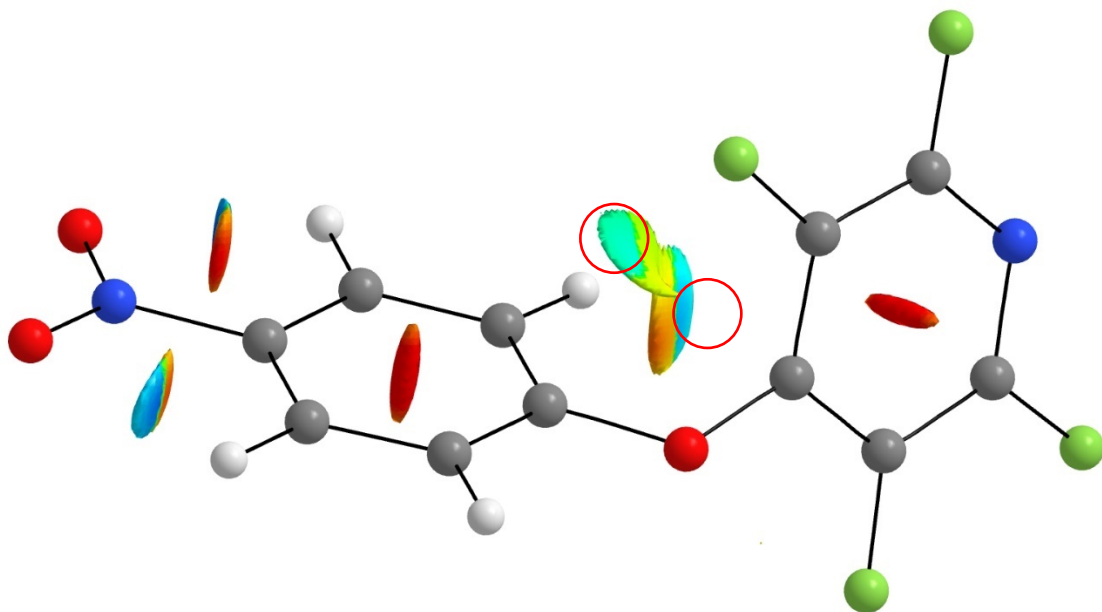

**9B**

TFP thioethers

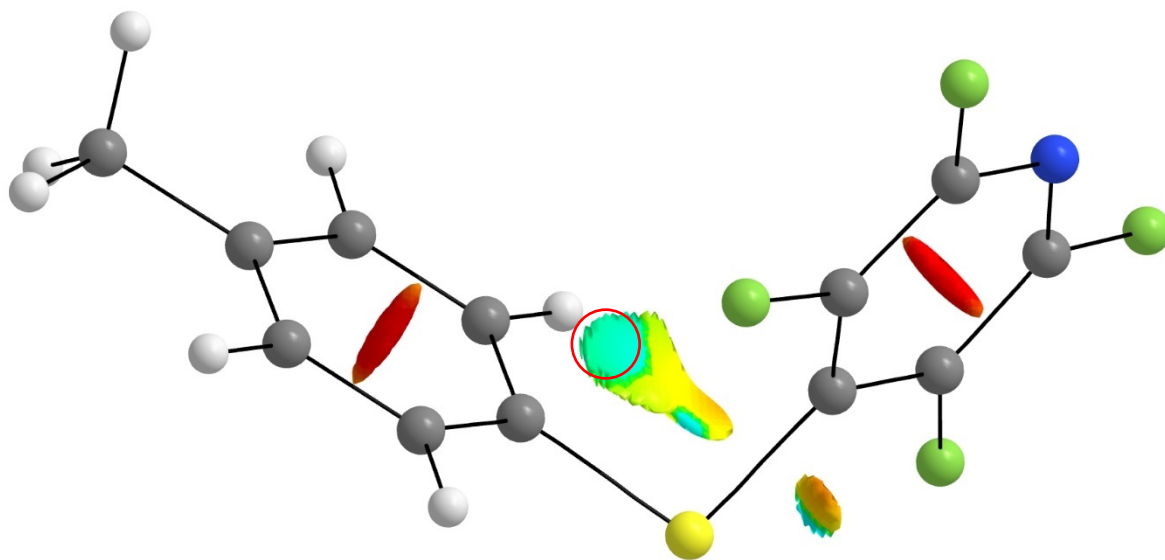

**2A**

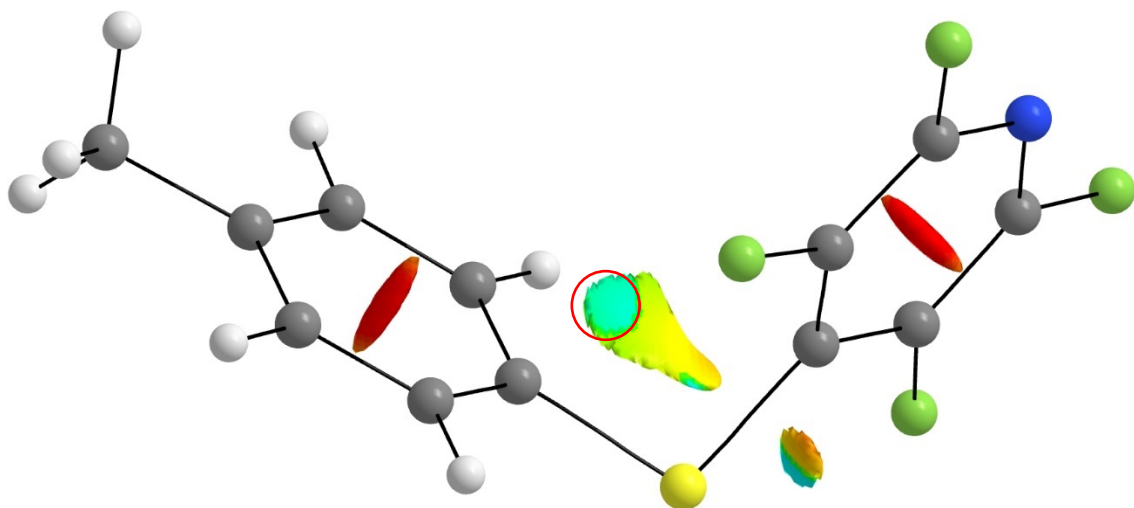

**2B**

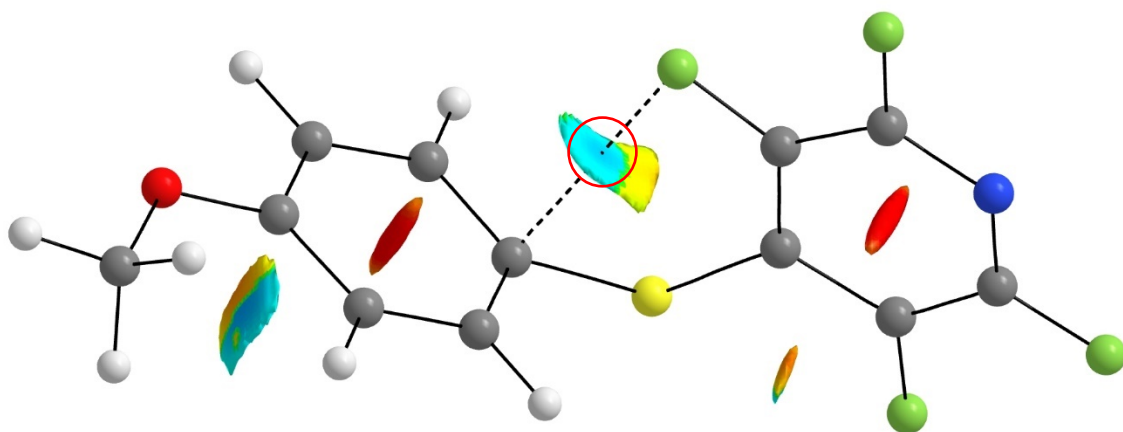

**10**

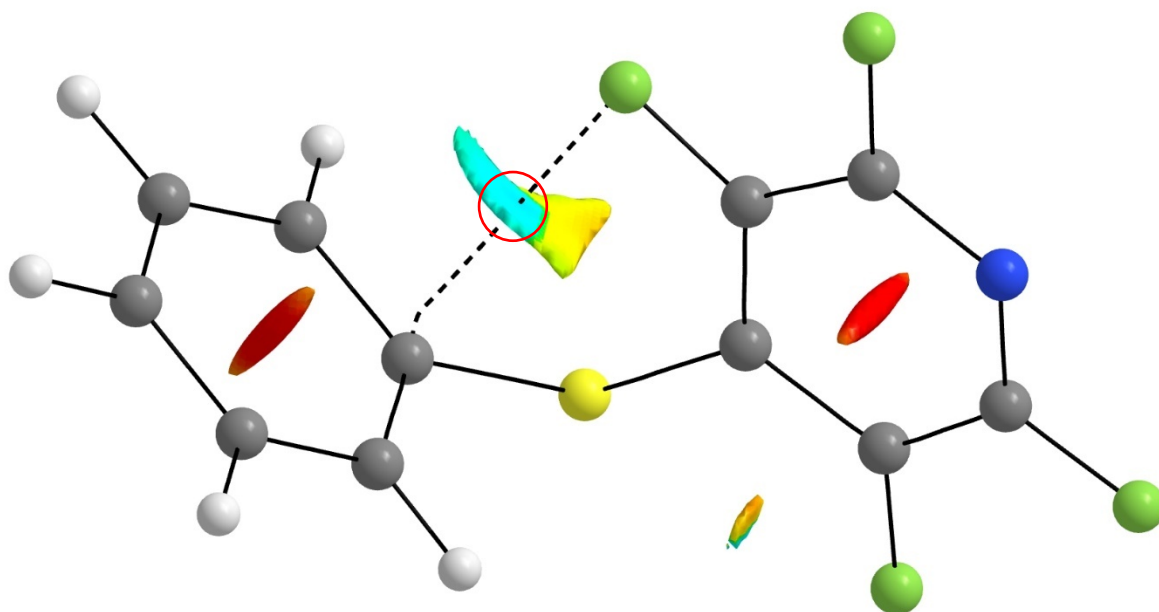

**11A**

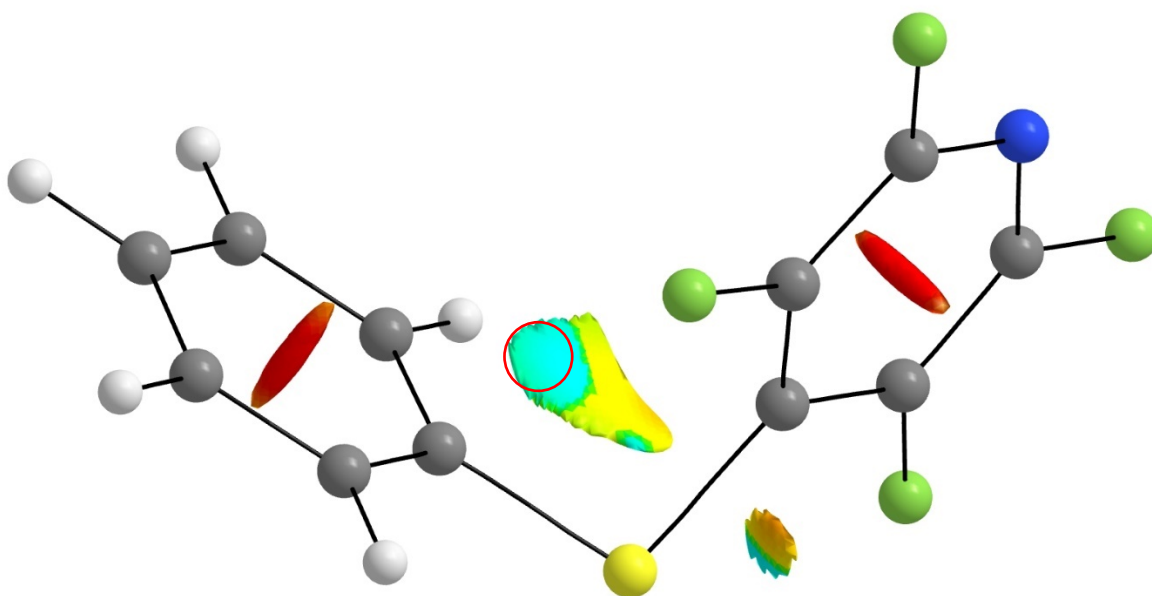

**11B**

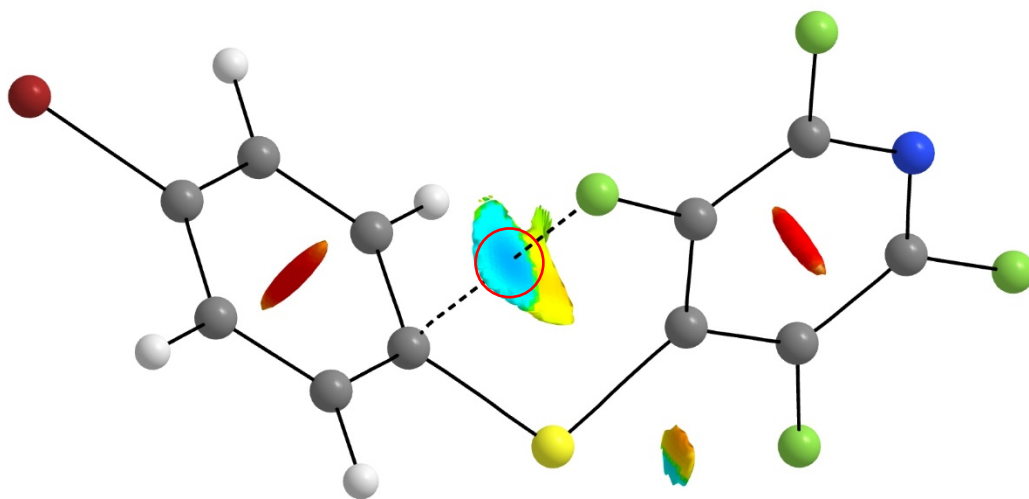

12

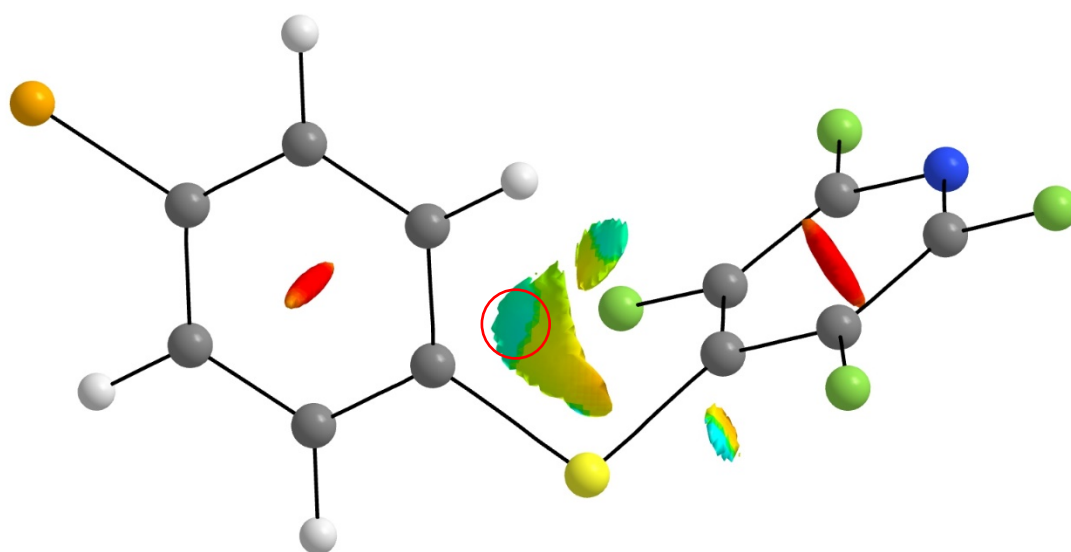

13

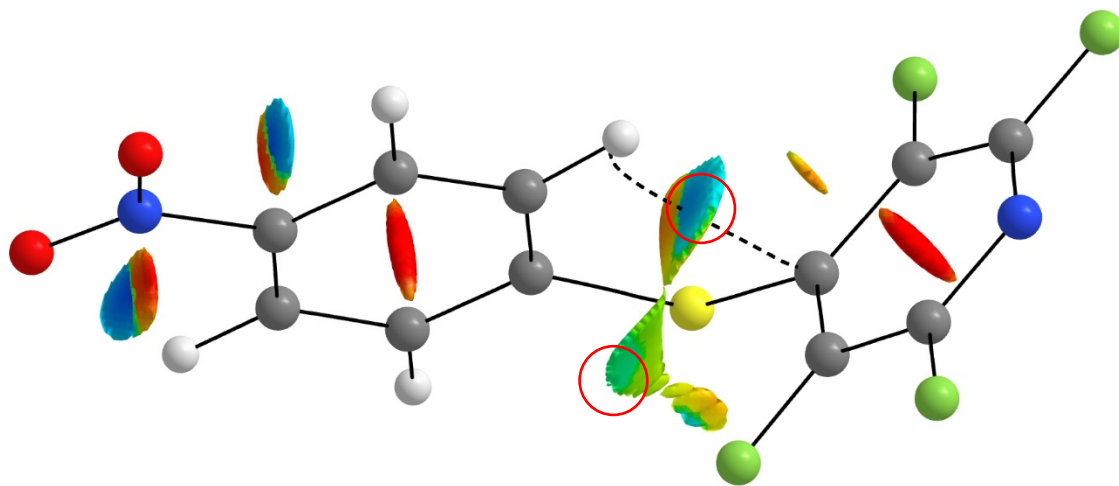

14

TCP ethers

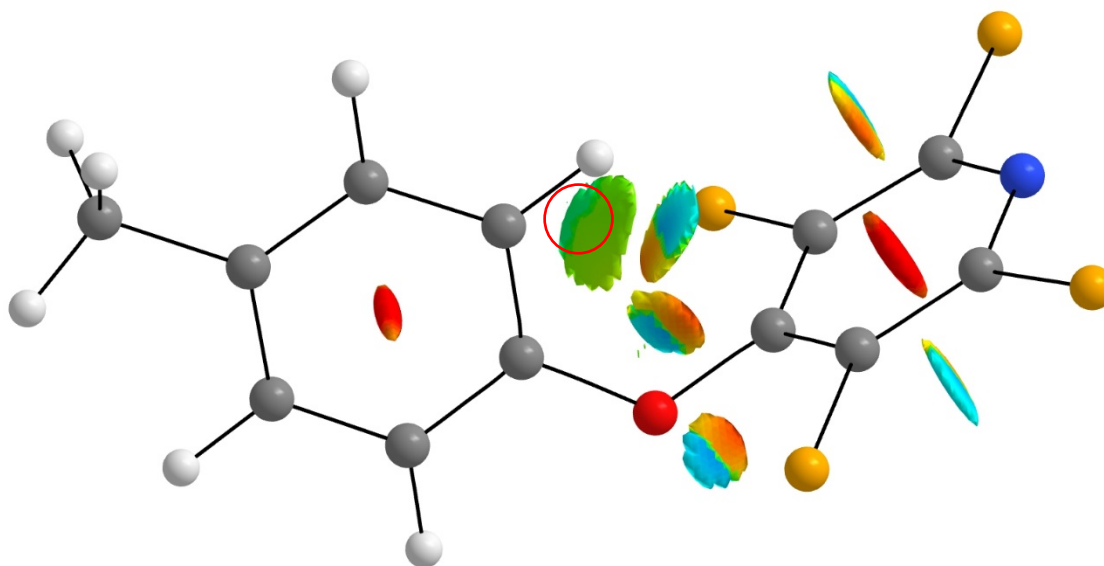

3

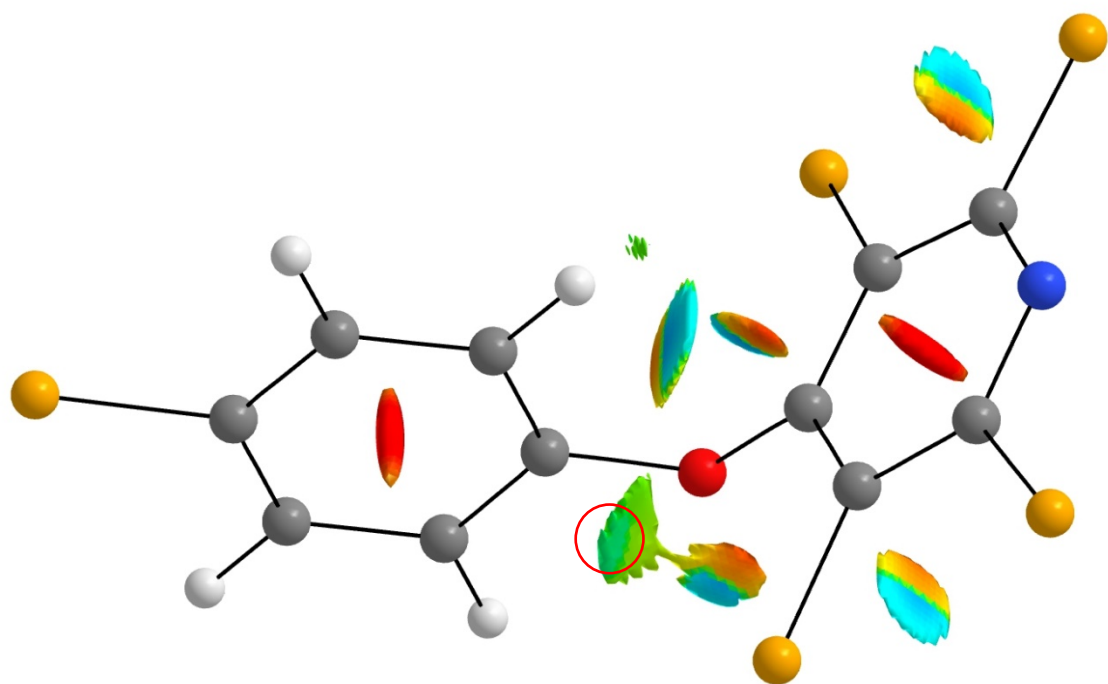

16A

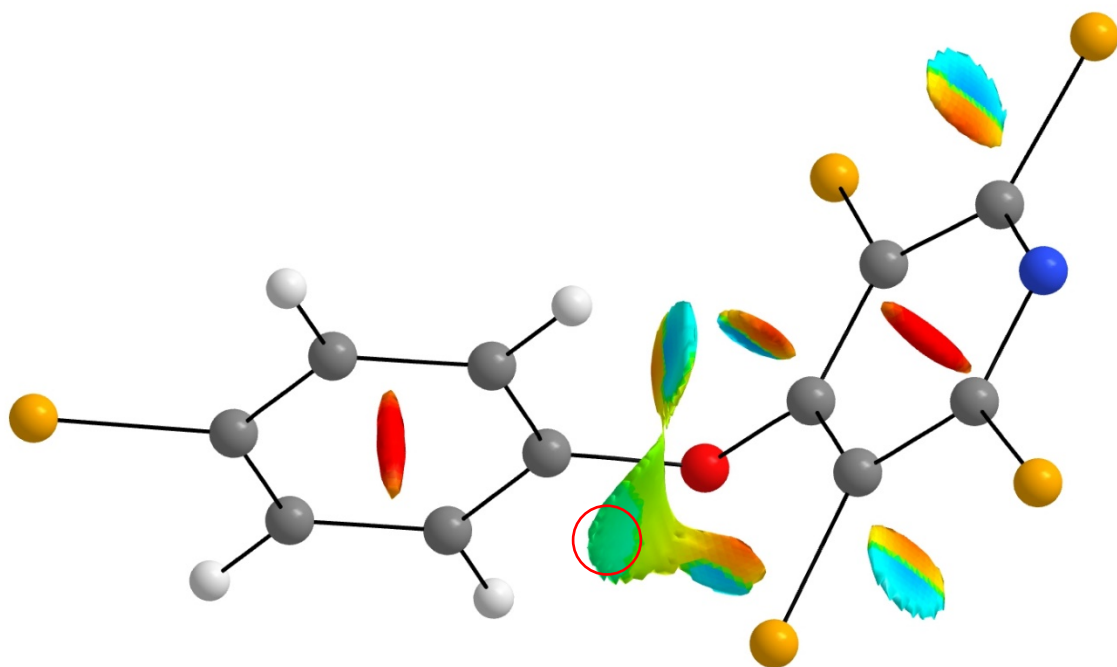

16B

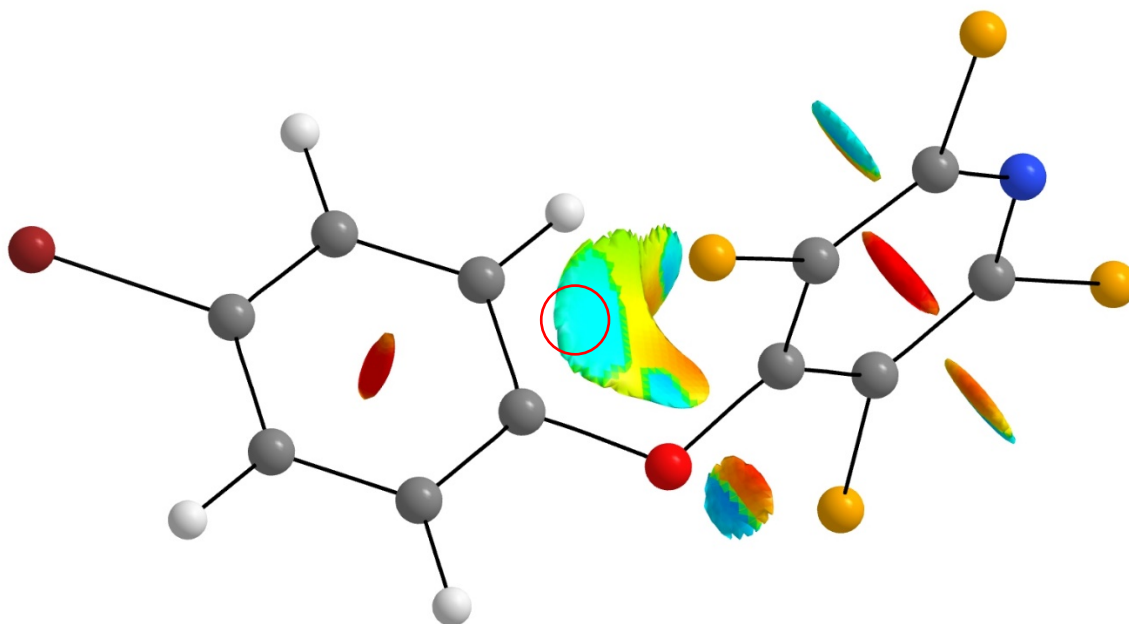

17A

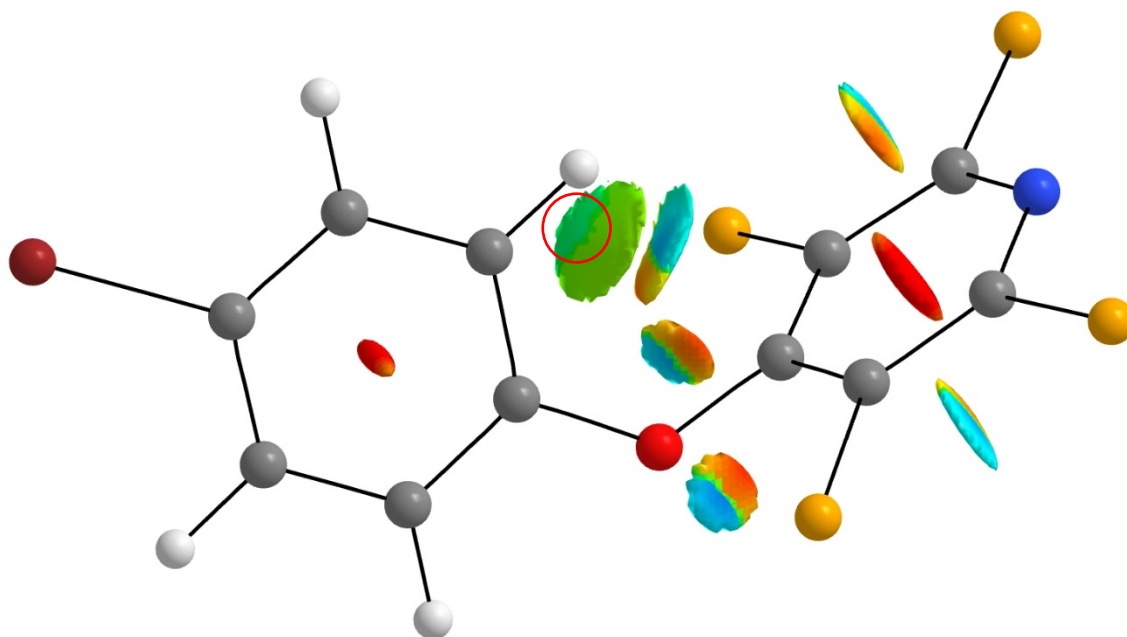

17B

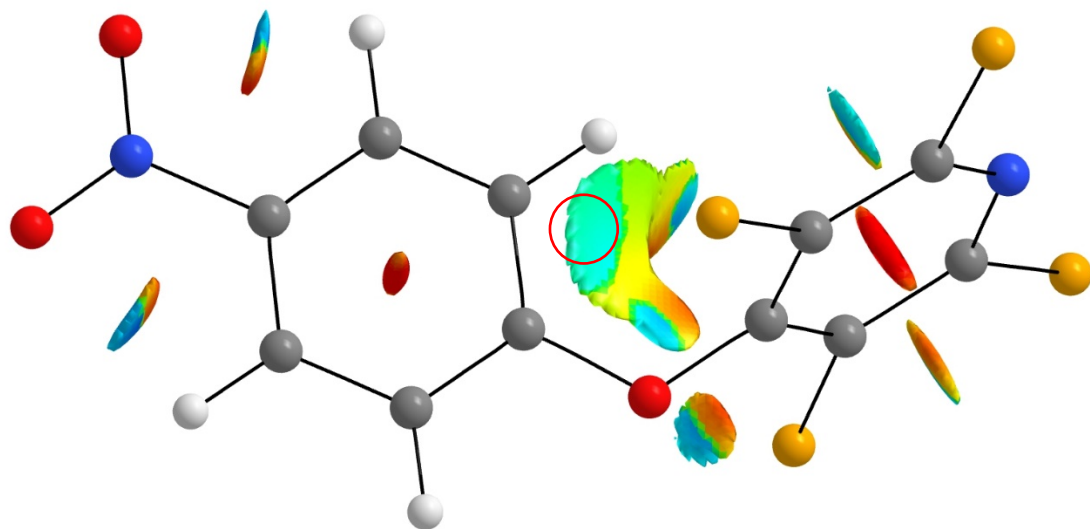

18A

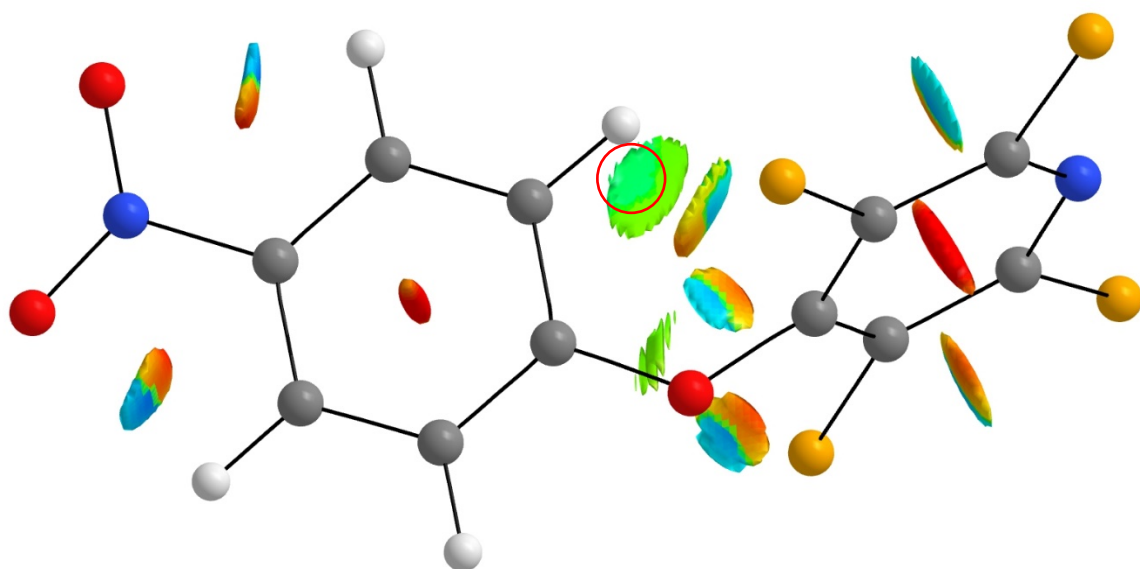

18B

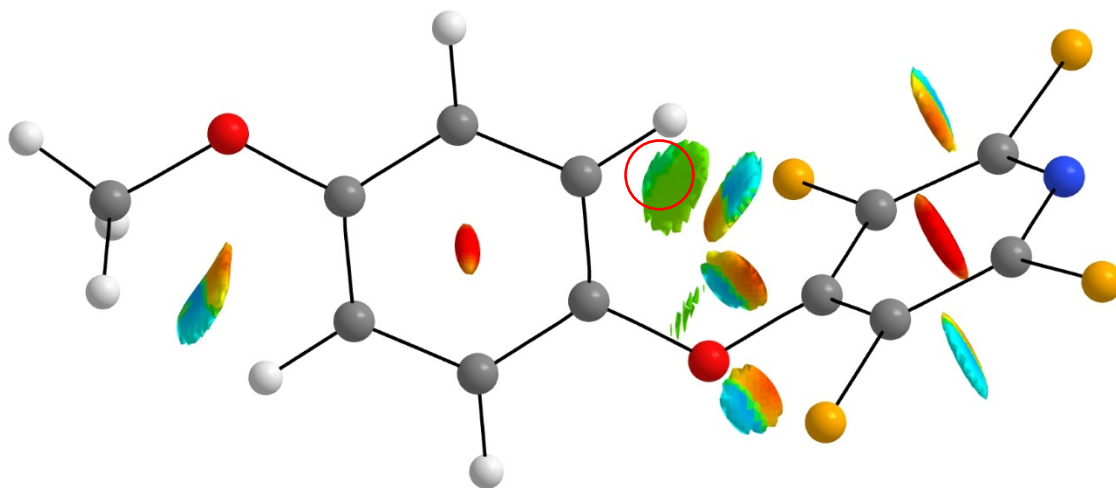

19

TCP thioethers

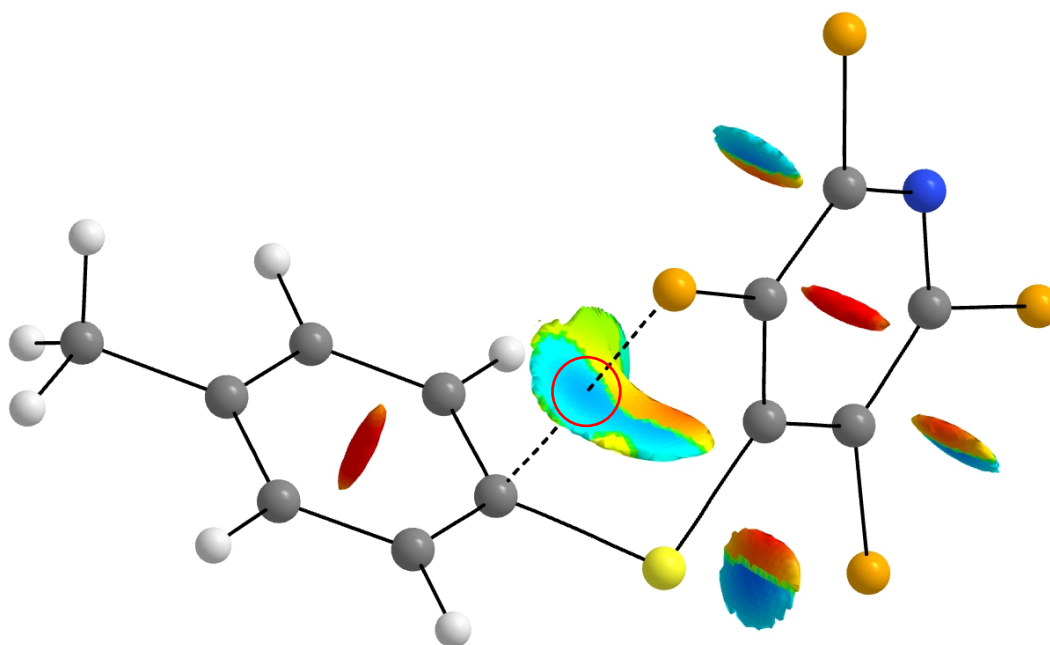

4

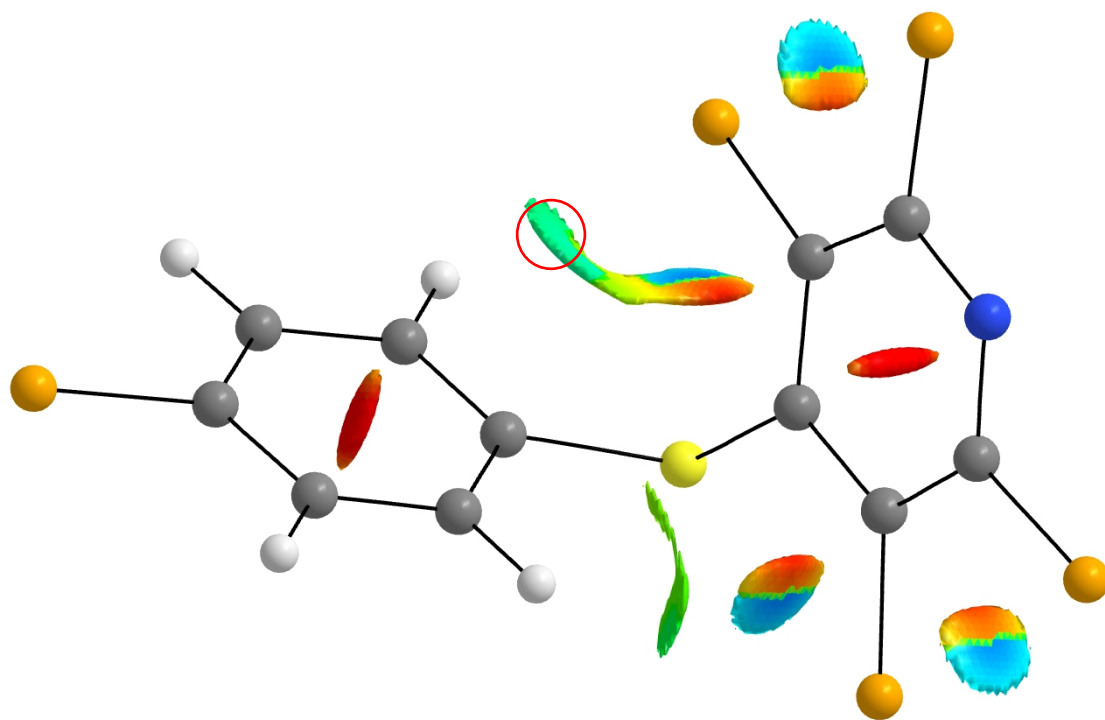

20A

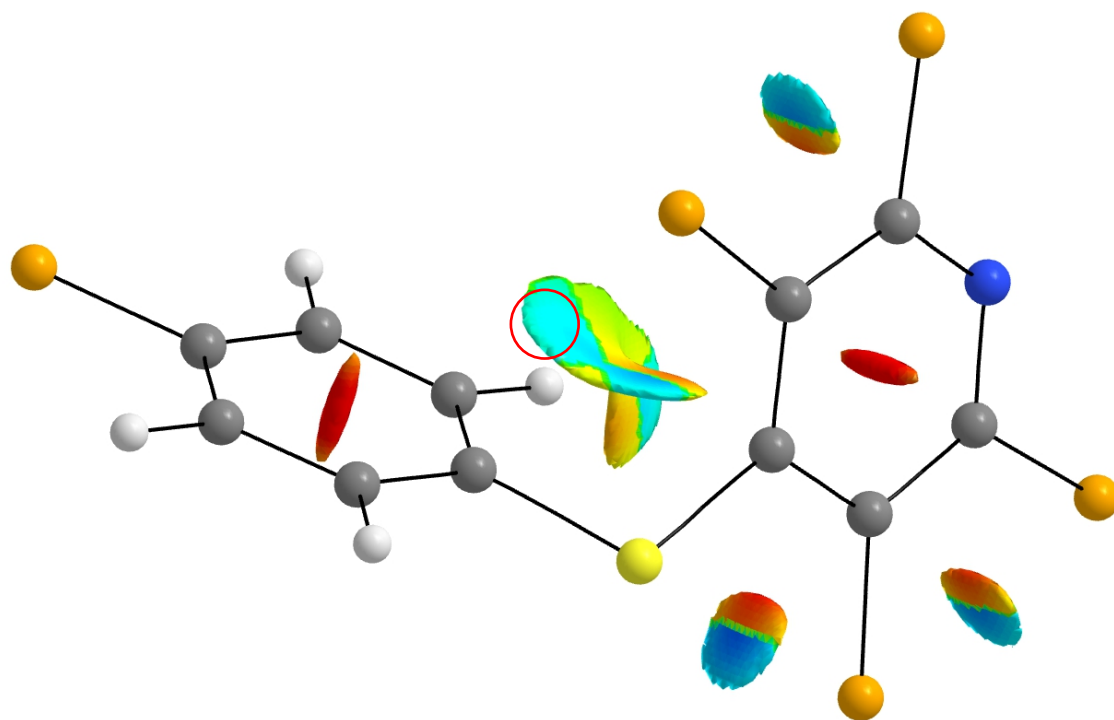

20B

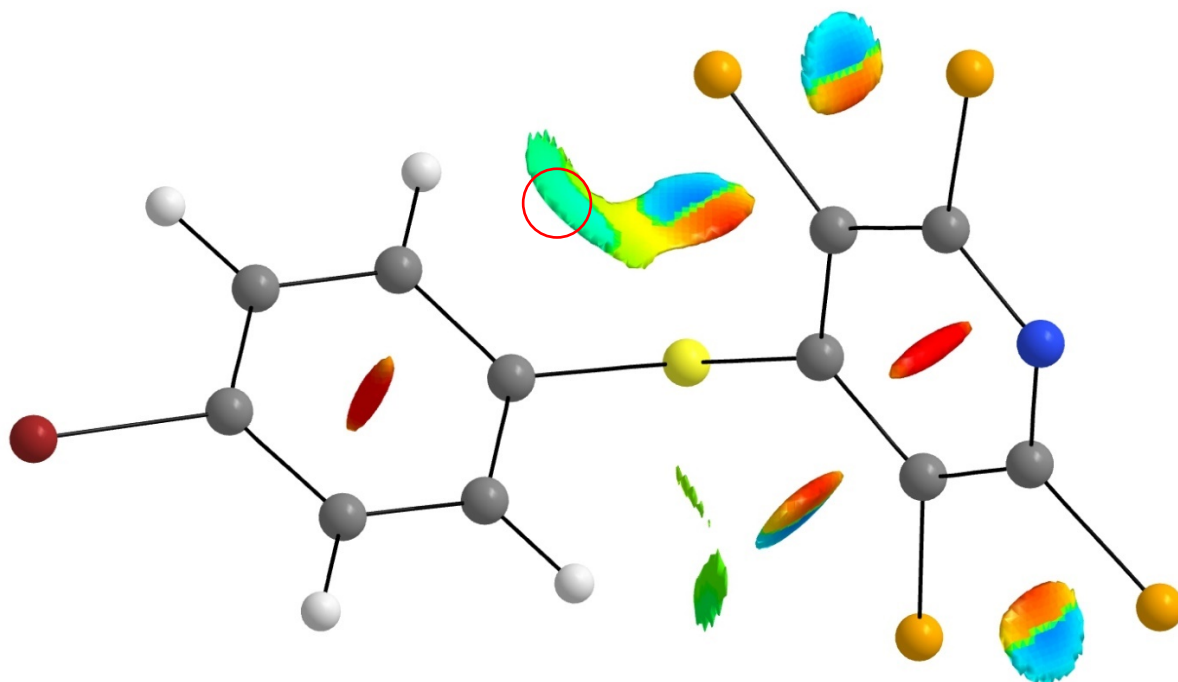

21A

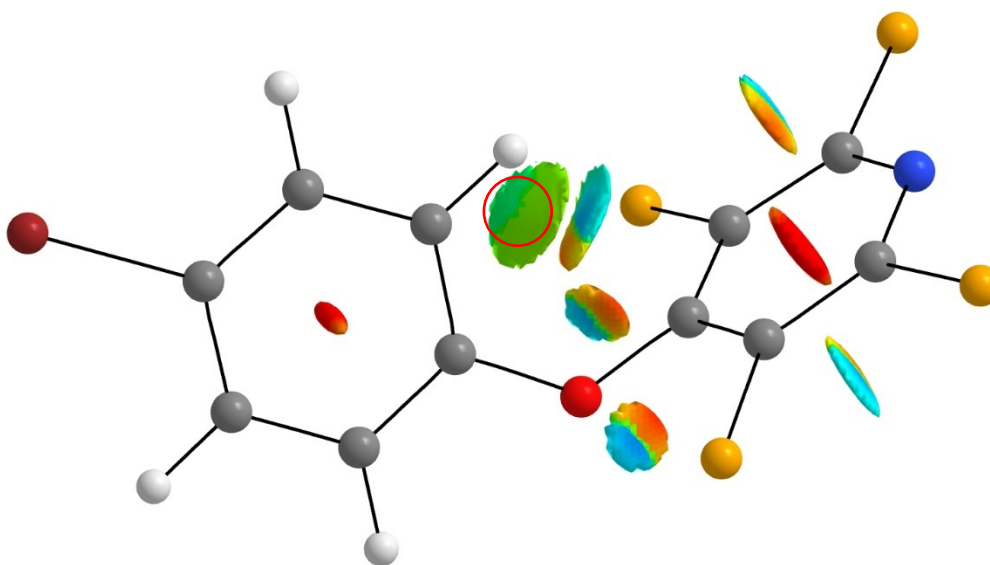

21B

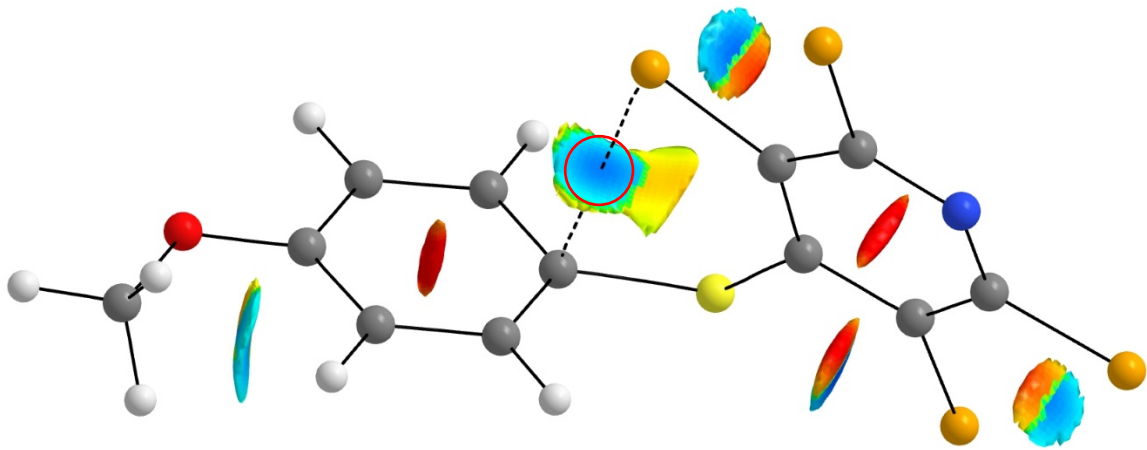

22

## References

- [1] a) W. D. G. Brittain, S. L. Cobb, *J. Org. Chem* **2020**, *85*, 6862-6871; b) W. D. G. Brittain, S. L. Cobb, *Org. Biomol. Chem* **2019**, *17*, 2110-2115; c) R. Gautam, I. Geniza, S. T. Iacono, C. M. Friesen, A. R. Jennings, *Molecules* **2022**, *27*, 1616.
- [2] Peloquin, A. J.; Corley, C. A.; Adas, S. K.; Balaich, G. J.; Iacono, S. T. Crystal structures and Hirshfeld surface analysis of a series of 4-O-arylperfluoropyridines. *Acta Crystallogr., Sect. E* 2019, *75*, 1102–1107.
- [3] O. V Dolomanov, L. J. Bourhis, J. A. Howard and H. Puschmann, *J. Appl. Cryst.*, 2009, *42*, 339–341.
- [4] C. B. Hübschle, G. M. Sheldrick and B. Dittrich, *J. Appl. Cryst.*, 2011, *44*, 1281–1284.
- [5] G. M. Sheldrick, *Acta Cryst.*, 2015, *A71*, 3–8.
- [6] C. F. Macrae, I. Sovago, S. J. Cottrell, P. T. A. Galek, P. McCabe, E. Pidcock, M. Platings, G. P. Shields, J. S. Stevens, M. Towler, and P. A. Wood, *J. Appl. Cryst.*, 53, 226-235. Mercury Version 4.0.
- [7] R. Dennington, T. Keith and J. Millam, Semichem Inc., Shawnee Mission, KS, 2019. GaussView, Version 6
- [8] [M. J. Frisch, G. W. Trucks, H. B. Schlegel, G. E. Scuseria, M. A. Robb, J. R. Cheeseman, G. Scalmani, V. Barone, G. A. Petersson, H. Nakatsuji, X. Li, M. Caricato, A. V. Marenich, J. Bloino, B. G. Janesko, R. Gomperts, B. Mennucci, H. P. Hratchian, J. V. Ortiz, A. F. Izmaylov, J. L. Sonnenberg, D. Williams-Young, F. Ding, F. Lipparini, F. Egidi, J. Goings, B. Peng, A. Petrone, T. Henderson, D. Ranasinghe, V. G. Zakrzewski, J. Gao, N. Rega, G. Zheng, W. Liang, M. Hada, M. Ehara, K. Toyota, R. Fukuda, J. Hasegawa, M. Ishida, T. Nakajima, Y. Honda, O. Kitao, H. Nakai, T. Vreven, K. Throssell, J. A. Montgomery, Jr., J. E. Peralta, F. Ogliaro, M. J. Bearpark, J. J. Heyd, E. N. Brothers, K. N. Kudin, V. N. Staroverov, T. A. Keith, R. Kobayashi, J. Normand, K. Raghavachari, A. P. Rendell, J. C. Burant, S. S. Iyengar, J. Tomasi, M. Cossi, J. M. Millam, M. Klene, C. Adamo, R. Cammi, J. W. Ochterski, R. L. Martin, K. Morokuma, O. Farkas, J. B. Foresman, and D. J. Fox, Gaussian 16, Revision B.01, Gaussian, Inc., Wallingford CT, 2016.
- [9] M. C. Madhusudhanan, H. Balan, D. B. Werz, K. M. Sureshan, *Angew. Chem. Int. Ed.* **2021**, *60*, 22797-22803.
- [10] T. A. Keith, AIMALL, version 19.10.12, TK Gristmill Software, Overland Park, KS, USA, 2019, <http://aim.tkgristmill.com>.
- [11] J. P. Foster and F. Weinhold, Natural hybrid orbitals, *J. Am. Chem. Soc.*, 102 (1980) 7211-18. A. E. Reed and F. Weinhold, Natural bond orbital analysis of near-Hartree-Fock water dimer, *J. Chem. Phys.*, 78 (1983) 4066-73.
